# Supplementary material for: Chromatin accessibility dynamics reveal novel functional enhancers in C. elegans
Source: Genome Res. 2017 Dec;27(12):2096–107. doi: 10.1101/gr.226233.117 (PMC5741055; doi:10.1101/gr.226233.117)
Supplement: Supplemental Material [file supp_gr.226233.117_Supplemental_Table_S1.xlsx]

## Sheet: S1 - Read details
Stage	Replicate	Mapping read number
Early embryo	A	35189228
Early embryo	B	29488800
Early embryo	C	37904556
Larval stage 3	A	6095682
Larval stage 3	B	4025832
Larval stage 3	C	21160826
Young adult	A	12805986
Young adult	B	3534182
Young adult	C	26410574
Input control	-	9823376
