# Supplementary material for: Chromatin accessibility dynamics reveal novel functional enhancers in C. elegans
Source: Genome Res. 2017 Dec;27(12):2096–107. doi: 10.1101/gr.226233.117 (PMC5741055; doi:10.1101/gr.226233.117)
Supplement: Supplemental Material [file supp_gr.226233.117_Supplemental_Table_S2.xlsx]

## Sheet: S2 - Peak details
Sample	Number of peaks
Early embryo	27694
Larval stage 3	13040
Young adult	15159
Merged all stage consensus	30832
