# Supplementary material for: Chromatin accessibility dynamics reveal novel functional enhancers in C. elegans
Source: Genome Res. 2017 Dec;27(12):2096–107. doi: 10.1101/gr.226233.117 (PMC5741055; doi:10.1101/gr.226233.117)
Supplement: Supplemental Material [file supp_gr.226233.117_Supplemental_Table_S3.xlsx]

## Sheet: S3 - Consensus Peaks
chr	start	stop	peak	EEvL3_FC	EEvL3_FDR	L3vYA_FC	L3vYA_FDR	EE_chromHMMState	L3_chromHMMState	YA_chromHMMState
chrI	295	1002	peak0	-0.327	0.504	-0.919	0.308	EE_lowSignal	L3_H3K27me3Repressed	NA
chrI	1859	1935	peak1	1.928	0.00209	-1.589	0.154	EE_activeEnhancer	L3_lowSignal	YA_repressedEnhancer
chrI	3887	4099	peak2	-1.437	9.11e-05	-0.912	0.325	EE_promoterTSS	L3_promoterTSS	YA_activeEnhancer
chrI	10341	10498	peak3	0.033	0.743	-0.186	0.747	EE_transcribedGeneBody	L3_lowSignal	YA_transcribedGeneBody
chrI	11076	11572	peak4	-0.742	0.0573	-0.579	0.613	EE_repressedEnhancer	L3_lowSignal	YA_activeEnhancer
chrI	12817	13338	peak5	0.564	0.36	-0.736	0.539	EE_repressedEnhancer	L3_transcribedGeneBody	YA_activeEnhancer
chrI	14929	15225	peak6	2.146	0.000532	-2.224	0.0329	EE_transcribedGeneBody	L3_transcribedGeneBody	YA_activeEnhancer
chrI	16933	17496	peak7	-0.067	0.737	-1	0.342	EE_promoterTSS	L3_repressedEnhancer	YA_repressedEnhancer
chrI	27065	27247	peak8	-1.27	0.00125	-0.494	0.671	EE_lowSignal	L3_lowSignal	YA_lowSignal
chrI	30239	30437	peak9	1.25	0.0123	-0.756	0.475	EE_repressedEnhancer	L3_transcribedGeneBody	YA_transcribedGeneBody
chrI	32037	32254	peak10	0.753	0.113	-0.83	0.449	EE_repressedEnhancer	L3_transcribedGeneBody	YA_promoterTSS
chrI	33693	34016	peak11	-0.645	0.117	-0.494	0.647	EE_activeEnhancer	L3_activeEnhancer	YA_activeEnhancer
chrI	34834	35110	peak12	0.331	0.606	-0.773	0.522	EE_repressedEnhancer	L3_activeEnhancer	YA_promoterTSS
chrI	35283	35602	peak13	-1.047	0.00586	0.538	0.606	NA	L3_activeEnhancer	YA_promoterTSS
chrI	38009	38359	peak14	2.362	1.24e-05	-2.217	0.0275	EE_repressedEnhancer	L3_transcribedGeneBody	YA_activeEnhancer
chrI	38906	39169	peak15	-0.999	0.0112	-0.394	0.749	EE_H3K27me3Repressed	L3_transcribedGeneBody	YA_activeEnhancer
chrI	39700	40101	peak16	-2.394	4.54e-11	-0.059	0.975	EE_repressedEnhancer	L3_activeEnhancer	YA_activeEnhancer
chrI	40291	40472	peak17	-1.349	0.000717	0.008	0.982	EE_repressedEnhancer	L3_activeEnhancer	YA_activeEnhancer
chrI	41926	42379	peak18	-1.822	4.32e-07	0.034	0.987	EE_repressedEnhancer	L3_activeEnhancer	NA
chrI	42932	43209	peak19	-0.528	0.205	0.378	0.795	EE_repressedEnhancer	L3_repressedEnhancer	YA_repressedEnhancer
chrI	45041	45283	peak20	-0.938	0.0283	-0.136	0.907	EE_H3K27me3Repressed	L3_lowSignal	YA_transcribedGeneBody
chrI	55647	55864	peak21	2.745	1.1e-05	-1.432	0.325	EE_repressedEnhancer	L3_H3K27me3Repressed	YA_transcribedGeneBody
chrI	56081	57384	peak22	0.005	0.982	-0.046	0.977	NA	L3_lowSignal	YA_H3K27me3Repressed
chrI	61783	62040	peak23	0.373	0.481	0.545	0.792	EE_lowSignal	L3_lowSignal	YA_heterochromatin
chrI	66973	67153	peak24	0.186	0.712	-0.659	0.636	EE_heterochromatin	L3_heterochromatin	YA_transcribedGeneBody
chrI	67770	67989	peak25	0.748	0.151	0.526	0.696	EE_H3K27me3Repressed	L3_lowSignal	YA_transcribedGeneBody
chrI	68486	68690	peak26	0.034	0.855	0.531	0.778	EE_heterochromatin	L3_transcribedGeneBody	YA_transcribedGeneBody
chrI	69841	70406	peak27	-0.901	0.0139	-0.006	0.998	EE_promoterTSS	L3_promoterTSS	YA_activeEnhancer
chrI	84313	84489	peak28	0.792	0.129	0.116	0.973	EE_transcribedGeneBody	L3_transcribedGeneBody	YA_transcribedGeneBody
chrI	85937	86223	peak29	-0.048	0.907	0.071	0.961	NA	L3_transcribedGeneBody	YA_transcribedGeneBody
chrI	86138	86649	peak30	-0.048	0.907	0.071	0.961	EE_activeEnhancer	L3_transcribedGeneBody	YA_transcribedGeneBody
chrI	91415	91615	peak31	0.885	0.0617	-0.815	0.362	EE_transcribedGeneBody	L3_transcribedGeneBody	YA_transcribedGeneBody
chrI	92198	92403	peak32	1.002	0.0522	-1.064	0.366	EE_activeEnhancer	L3_activeEnhancer	YA_transcribedGeneBody
chrI	93132	94006	peak33	-0.217	0.659	-1.05	0.26	EE_transcribedGeneBody	L3_transcribedGeneBody	YA_transcribedGeneBody
chrI	95000	95224	peak34	1.104	0.131	-1.916	0.0648	EE_transcribedGeneBody	L3_repressedEnhancer	YA_transcribedGeneBody
chrI	96457	96797	peak35	0.419	0.494	-0.78	0.456	EE_promoterTSS	L3_activeEnhancer	YA_promoterTSS
chrI	98561	99007	peak36	0.222	0.652	-0.87	0.41	EE_transcribedGeneBody	L3_transcribedGeneBody	YA_transcribedGeneBody
chrI	103086	103317	peak37	0.495	0.371	-1.025	0.397	EE_transcribedGeneBody	L3_transcribedGeneBody	YA_transcribedGeneBody
chrI	108182	109776	peak38	-0.736	0.0508	-0.056	0.971	EE_transcribedGeneBody	NA	YA_promoterTSS
chrI	110531	110834	peak39	-1.539	3.11e-05	-0.267	0.838	EE_promoterTSS	L3_promoterTSS	YA_promoterTSS
chrI	111530	112646	peak40	-0.374	0.385	-0.86	0.354	EE_transcribedGeneBody	L3_promoterTSS	YA_promoterTSS
chrI	116450	116989	peak41	0.215	0.581	-0.67	0.531	EE_repressedEnhancer	L3_H3K27me3Repressed	YA_H3K27me3Repressed
chrI	117092	117408	peak42	0.375	0.311	-0.609	0.584	EE_repressedEnhancer	L3_H3K27me3Repressed	YA_H3K27me3Repressed
chrI	119678	120631	peak43	0.345	0.416	-0.337	0.77	NA	L3_lowSignal	YA_heterochromatin
chrI	120901	121247	peak44	-0.082	0.886	0.043	0.954	EE_repressedEnhancer	L3_lowSignal	YA_H3K27me3Repressed
chrI	122366	122701	peak45	0.26	0.569	0.073	0.928	EE_repressedEnhancer	L3_repressedEnhancer	YA_H3K27me3Repressed
chrI	124741	124958	peak46	2.215	3.23e-05	0.231	0.897	EE_repressedEnhancer	L3_repressedEnhancer	YA_repressedEnhancer
chrI	128179	129274	peak47	-0.086	0.887	-0.214	0.86	EE_promoterTSS	L3_promoterTSS	YA_transcribedGeneBody
chrI	129861	130089	peak48	-0.156	0.73	0.927	0.451	EE_activeEnhancer	L3_transcribedGeneBody	YA_activeEnhancer
chrI	130313	131161	peak49	0.339	0.426	0.383	0.751	EE_activeEnhancer	L3_repressedEnhancer	YA_transcribedGeneBody
chrI	132323	132528	peak50	1.747	0.00216	-2.142	0.0356	EE_transcribedGeneBody	L3_transcribedGeneBody	YA_transcribedGeneBody
chrI	137635	138331	peak51	0.349	0.408	0.043	0.975	EE_H3K27me3Repressed	L3_heterochromatin	YA_H3K27me3Repressed
chrI	142030	142181	peak52	-0.039	0.992	0.234	0.765	EE_heterochromatin	L3_heterochromatin	YA_heterochromatin
chrI	142335	142818	peak53	3.701	5.72e-10	-1.524	0.231	EE_heterochromatin	L3_heterochromatin	YA_heterochromatin
chrI	149345	149779	peak54	0.932	0.0191	-0.015	0.871	EE_heterochromatin	L3_heterochromatin	YA_heterochromatin
chrI	150936	151469	peak55	0.091	0.89	0.387	0.778	EE_heterochromatin	L3_heterochromatin	YA_H3K27me3Repressed
chrI	153386	153613	peak56	0.362	0.49	-0.241	0.98	EE_heterochromatin	L3_lowSignal	YA_lowSignal
chrI	155971	156255	peak57	-1.041	0.0077	0.748	0.485	EE_repressedEnhancer	L3_lowSignal	YA_activeEnhancer
chrI	159276	159550	peak58	0.126	0.991	0.207	0.95	EE_repressedEnhancer	L3_lowSignal	YA_activeEnhancer
chrI	160138	160584	peak59	0.549	0.352	0.161	0.979	EE_lowSignal	L3_lowSignal	YA_repressedEnhancer
chrI	160738	161032	peak60	0.675	0.0766	-0.57	0.64	EE_H3K27me3Repressed	L3_lowSignal	YA_H3K27me3Repressed
chrI	161657	161841	peak61	2.094	0.000904	-0.955	0.544	EE_H3K27me3Repressed	L3_transcribedGeneBody	YA_H3K27me3Repressed
chrI	166907	167213	peak62	-0.998	0.0129	1.64	0.0908	EE_H3K27me3Repressed	L3_lowSignal	YA_repressedEnhancer
chrI	167953	168260	peak63	0.664	0.157	-0.026	0.979	EE_repressedEnhancer	L3_promoterTSS	YA_H3K27me3Repressed
chrI	168545	168730	peak64	0.049	0.967	0.401	0.697	EE_repressedEnhancer	L3_repressedEnhancer	YA_H3K27me3Repressed
chrI	169754	169984	peak65	0.008	0.956	1.29	0.304	EE_repressedEnhancer	L3_repressedEnhancer	NA
chrI	172073	172266	peak66	2.274	4.07e-05	-1.535	0.253	EE_repressedEnhancer	L3_lowSignal	YA_activeEnhancer
chrI	172702	174527	peak67	-0.057	0.915	-0.016	0.996	NA	L3_transcribedGeneBody	NA
chrI	178054	178698	peak68	-0.082	0.853	0.607	0.593	EE_repressedEnhancer	L3_lowSignal	YA_activeEnhancer
chrI	179253	179433	peak69	-0.631	0.11	1.213	0.321	EE_activeEnhancer	L3_lowSignal	YA_activeEnhancer
chrI	180124	180448	peak70	-0.224	0.588	0.125	0.948	EE_activeEnhancer	L3_activeEnhancer	YA_activeEnhancer
chrI	181666	182006	peak71	-0.202	0.678	-0.32	0.807	EE_transcribedGeneBody	L3_transcribedGeneBody	YA_promoterTSS
chrI	198962	199210	peak72	3.318	7.9e-08	-1.925	0.107	EE_repressedEnhancer	L3_lowSignal	YA_transcribedGeneBody
chrI	227858	228174	peak73	0.456	0.359	0.622	0.733	EE_H3K27me3Repressed	L3_heterochromatin	YA_transcribedGeneBody
chrI	228187	230098	peak74	0.248	0.568	-0.094	0.95	EE_H3K27me3Repressed	L3_heterochromatin	YA_transcribedGeneBody
chrI	230211	230887	peak75	0.398	0.347	-0.287	0.851	EE_H3K27me3Repressed	L3_H3K27me3Repressed	YA_transcribedGeneBody
chrI	231268	231721	peak76	1.4	0.000923	0.005	0.936	EE_H3K27me3Repressed	L3_heterochromatin	YA_transcribedGeneBody
chrI	231772	232181	peak77	0.493	0.23	-0.699	0.507	EE_H3K27me3Repressed	L3_H3K27me3Repressed	YA_transcribedGeneBody
chrI	238258	238416	peak78	0.506	0.433	-0.769	0.658	EE_H3K27me3Repressed	L3_H3K27me3Repressed	YA_transcribedGeneBody
chrI	240265	240545	peak79	1.526	0.00019	0.455	0.676	EE_H3K27me3Repressed	L3_repressedEnhancer	YA_H3K27me3Repressed
chrI	248216	248376	peak80	1.263	0.0266	-1.042	0.441	EE_heterochromatin	L3_heterochromatin	YA_H3K27me3Repressed
chrI	248651	248911	peak81	-0.113	0.987	0.121	0.997	EE_heterochromatin	L3_heterochromatin	YA_transcribedGeneBody
chrI	257444	257707	peak82	0.453	0.358	-0.091	0.87	EE_H3K27me3Repressed	L3_lowSignal	YA_H3K27me3Repressed
chrI	257929	258372	peak83	-0.302	0.581	0.347	0.813	EE_repressedEnhancer	L3_lowSignal	YA_H3K27me3Repressed
chrI	260146	260456	peak84	0.353	0.535	-0.417	0.806	EE_repressedEnhancer	L3_lowSignal	YA_H3K27me3Repressed
chrI	261930	262256	peak85	-0.257	0.443	-0.801	0.516	EE_lowSignal	L3_lowSignal	YA_H3K27me3Repressed
chrI	269367	269442	peak86	0.263	0.204	0.623	0.944	EE_repressedEnhancer	L3_repressedEnhancer	YA_H3K27me3Repressed
chrI	270243	270445	peak87	0.692	0.0669	-0.101	0.945	EE_activeEnhancer	L3_repressedEnhancer	YA_lowSignal
chrI	274454	274676	peak88	1.721	0.000459	0.296	0.918	EE_repressedEnhancer	L3_repressedEnhancer	YA_repressedEnhancer
chrI	275602	275887	peak89	-0.405	0.323	0.83	0.566	EE_repressedEnhancer	L3_repressedEnhancer	YA_H3K27me3Repressed
chrI	276300	276801	peak90	1.007	0.0177	-0.432	0.83	EE_repressedEnhancer	NA	YA_repressedEnhancer
chrI	276998	277336	peak91	0.278	0.742	-0.229	0.942	EE_repressedEnhancer	L3_transcribedGeneBody	YA_activeEnhancer
chrI	279691	280113	peak92	-0.094	0.796	0.107	0.942	EE_repressedEnhancer	L3_repressedEnhancer	YA_activeEnhancer
chrI	284971	285284	peak93	1.82	0.000318	-1.524	0.217	EE_repressedEnhancer	L3_transcribedGeneBody	YA_H3K27me3Repressed
chrI	289078	289289	peak94	-1.344	0.000562	0.788	0.504	EE_promoterTSS	L3_promoterTSS	YA_activeEnhancer
chrI	290352	290568	peak95	0.567	0.321	-0.224	0.899	EE_repressedEnhancer	L3_transcribedGeneBody	YA_transcribedGeneBody
chrI	293166	293373	peak96	0.657	0.13	0.758	0.711	EE_repressedEnhancer	L3_transcribedGeneBody	YA_transcribedGeneBody
chrI	295905	296431	peak97	-0.809	0.0397	1.253	0.18	EE_repressedEnhancer	L3_activeEnhancer	YA_transcribedGeneBody
chrI	297396	297762	peak98	0.154	0.805	-0.119	0.994	EE_repressedEnhancer	L3_activeEnhancer	YA_transcribedGeneBody
chrI	298512	298745	peak99	-1.442	8.9e-05	0.485	0.684	EE_heterochromatin	L3_activeEnhancer	YA_transcribedGeneBody
chrI	299473	300217	peak100	-1.628	7.29e-06	0.658	0.528	EE_repressedEnhancer	L3_activeEnhancer	YA_activeEnhancer
chrI	301303	301524	peak101	0.73	0.29	-0.95	0.47	EE_repressedEnhancer	L3_transcribedGeneBody	YA_activeEnhancer
chrI	307986	308437	peak102	1.057	0.014	-0.942	0.369	EE_H3K27me3Repressed	L3_transcribedGeneBody	YA_transcribedGeneBody
chrI	310821	311511	peak103	0.079	0.873	-0.003	0.987	EE_promoterTSS	L3_activeEnhancer	YA_transcribedGeneBody
chrI	312116	312311	peak104	0.009	0.979	-0.455	0.697	EE_transcribedGeneBody	L3_transcribedGeneBody	YA_transcribedGeneBody
chrI	314136	314650	peak105	-0.293	0.569	-0.515	0.628	EE_transcribedGeneBody	L3_transcribedGeneBody	YA_promoterTSS
chrI	315122	315389	peak106	-0.688	0.0304	-0.7	0.514	EE_promoterTSS	L3_promoterTSS	YA_activeEnhancer
chrI	316261	316418	peak107	-0.54	0.0528	-0.973	0.376	EE_promoterTSS	L3_transcribedGeneBody	YA_lowSignal
chrI	318849	319055	peak108	1.447	0.0233	-1.089	0.357	EE_promoterTSS	L3_transcribedGeneBody	YA_transcribedGeneBody
chrI	321223	322350	peak109	0.124	0.784	-0.843	0.378	EE_transcribedGeneBody	L3_transcribedGeneBody	YA_transcribedGeneBody
chrI	322905	323069	peak110	1.187	0.229	-2.025	0.114	EE_promoterTSS	L3_transcribedGeneBody	YA_promoterTSS
chrI	332693	332904	peak111	1.768	0.00187	-1.581	0.108	EE_transcribedGeneBody	L3_transcribedGeneBody	YA_transcribedGeneBody
chrI	341209	341869	peak112	0.688	0.122	-1.059	0.265	EE_heterochromatin	L3_heterochromatin	YA_transcribedGeneBody
chrI	360722	361005	peak113	-0.27	0.632	0.466	0.708	EE_transcribedGeneBody	L3_lowSignal	YA_transcribedGeneBody
chrI	364233	364411	peak114	-0.422	0.305	-1.463	0.116	EE_lowSignal	L3_lowSignal	YA_transcribedGeneBody
chrI	364671	365131	peak115	0.138	0.729	-1.129	0.24	EE_transcribedGeneBody	L3_promoterTSS	YA_promoterTSS
chrI	366893	367101	peak116	2.97	1.78e-06	-2.739	0.00401	EE_transcribedGeneBody	L3_lowSignal	YA_transcribedGeneBody
chrI	367747	367906	peak117	1.61	0.00308	-1.049	0.311	EE_transcribedGeneBody	L3_lowSignal	YA_transcribedGeneBody
chrI	368748	369267	peak118	0.895	0.0472	-1.804	0.0226	EE_transcribedGeneBody	L3_transcribedGeneBody	YA_transcribedGeneBody
chrI	378716	380110	peak119	-0.595	0.128	-0.445	0.688	EE_transcribedGeneBody	L3_transcribedGeneBody	YA_promoterTSS
chrI	380209	380599	peak120	-0.264	0.649	-0.57	0.629	EE_transcribedGeneBody	L3_transcribedGeneBody	YA_promoterTSS
chrI	380776	381879	peak121	-0.184	0.712	-0.695	0.494	EE_promoterTSS	L3_promoterTSS	YA_promoterTSS
chrI	382149	382911	peak122	-0.611	0.114	-0.559	0.597	EE_promoterTSS	L3_promoterTSS	YA_promoterTSS
chrI	384720	385076	peak123	0.307	0.45	-1.002	0.332	EE_transcribedGeneBody	L3_transcribedGeneBody	YA_promoterTSS
chrI	391342	391504	peak124	0.279	0.387	-0.096	0.842	EE_transcribedGeneBody	L3_transcribedGeneBody	YA_transcribedGeneBody
chrI	392556	392966	peak125	0.427	0.319	-0.629	0.587	EE_transcribedGeneBody	L3_transcribedGeneBody	YA_transcribedGeneBody
chrI	393009	393233	peak126	0.202	0.673	-0.521	0.693	EE_transcribedGeneBody	L3_transcribedGeneBody	YA_transcribedGeneBody
chrI	395196	395815	peak127	-0.8	0.0369	0.488	0.664	EE_activeEnhancer	L3_transcribedGeneBody	YA_activeEnhancer
chrI	397561	398303	peak128	-1.669	3.02e-06	0.235	0.856	EE_activeEnhancer	L3_promoterTSS	YA_activeEnhancer
chrI	421430	421721	peak129	2.402	3.98e-05	0.247	0.739	EE_lowSignal	L3_lowSignal	YA_heterochromatin
chrI	424552	424824	peak130	0.907	0.0502	-0.173	0.942	EE_repressedEnhancer	L3_repressedEnhancer	YA_lowSignal
chrI	426884	427034	peak131	-1.037	0.0142	0.246	0.882	EE_repressedEnhancer	L3_lowSignal	YA_H3K27me3Repressed
chrI	428713	428899	peak132	-0.469	0.408	0.286	0.861	EE_lowSignal	L3_repressedEnhancer	YA_H3K27me3Repressed
chrI	429136	429465	peak133	-1.49	8.47e-05	1.755	0.052	EE_repressedEnhancer	L3_repressedEnhancer	YA_H3K27me3Repressed
chrI	430313	430465	peak134	0.146	0.943	1.069	0.424	EE_repressedEnhancer	L3_lowSignal	YA_H3K27me3Repressed
chrI	431075	431279	peak135	4.133	8.06e-12	-1.692	0.117	EE_lowSignal	L3_repressedEnhancer	YA_lowSignal
chrI	432583	432904	peak136	1.067	0.0631	0.153	0.958	EE_repressedEnhancer	L3_repressedEnhancer	YA_repressedEnhancer
chrI	433353	433961	peak137	-1.22	0.000802	0.714	0.466	EE_repressedEnhancer	L3_activeEnhancer	YA_repressedEnhancer
chrI	437670	438326	peak138	-0.398	0.371	0.538	0.599	EE_repressedEnhancer	L3_activeEnhancer	YA_repressedEnhancer
chrI	438874	439311	peak139	0.584	0.177	1.049	0.385	EE_activeEnhancer	L3_transcribedGeneBody	YA_lowSignal
chrI	439331	439660	peak140	1.978	1.25e-06	-0.488	0.803	EE_activeEnhancer	L3_transcribedGeneBody	YA_repressedEnhancer
chrI	440434	440730	peak141	2.212	5.15e-08	-0.199	0.96	EE_activeEnhancer	L3_transcribedGeneBody	YA_H3K27me3Repressed
chrI	441228	442418	peak142	1.03	0.00532	0.095	0.943	EE_activeEnhancer	L3_transcribedGeneBody	YA_repressedEnhancer
chrI	442772	443447	peak143	0.848	0.0257	-0.156	0.929	EE_activeEnhancer	L3_transcribedGeneBody	NA
chrI	445581	445815	peak144	2.107	8.3e-06	0.054	0.942	EE_promoterTSS	L3_transcribedGeneBody	YA_transcribedGeneBody
chrI	447930	448193	peak145	0.348	0.465	-0.003	0.992	EE_transcribedGeneBody	L3_transcribedGeneBody	YA_transcribedGeneBody
chrI	448571	448847	peak146	1.89	0.000913	-0.557	0.944	EE_repressedEnhancer	L3_transcribedGeneBody	YA_transcribedGeneBody
chrI	449383	449705	peak147	0.148	0.699	1.193	0.356	EE_activeEnhancer	L3_transcribedGeneBody	YA_transcribedGeneBody
chrI	452371	452998	peak148	2.195	9.23e-08	-0.033	0.968	EE_transcribedGeneBody	L3_transcribedGeneBody	YA_transcribedGeneBody
chrI	453453	453931	peak149	1.836	1.65e-05	-0.862	0.462	EE_transcribedGeneBody	L3_transcribedGeneBody	YA_transcribedGeneBody
chrI	454813	454977	peak150	2.487	5.75e-05	-1.028	0.541	EE_transcribedGeneBody	L3_transcribedGeneBody	YA_transcribedGeneBody
chrI	457695	458103	peak151	0.253	0.547	-0.362	0.719	EE_transcribedGeneBody	L3_transcribedGeneBody	YA_transcribedGeneBody
chrI	458220	458546	peak152	0.978	0.0636	-0.713	0.476	EE_transcribedGeneBody	L3_transcribedGeneBody	YA_transcribedGeneBody
chrI	461683	461838	peak153	-0.282	0.464	-0.356	0.876	EE_promoterTSS	L3_promoterTSS	YA_lowSignal
chrI	464030	464320	peak154	1.892	7.46e-05	-1.194	0.198	EE_repressedEnhancer	L3_lowSignal	YA_repressedEnhancer
chrI	470985	471277	peak155	1.369	0.0331	0.577	0.617	EE_activeEnhancer	L3_lowSignal	YA_H3K27me3Repressed
chrI	472386	472461	peak156	0.281	0.85	0.401	0.472	EE_H3K27me3Repressed	L3_H3K27me3Repressed	YA_heterochromatin
chrI	475365	475675	peak157	2.284	5.18e-07	-0.204	0.842	EE_repressedEnhancer	L3_lowSignal	YA_heterochromatin
chrI	476388	476595	peak158	4.013	1.22e-11	-0.749	0.713	EE_repressedEnhancer	L3_lowSignal	YA_H3K27me3Repressed
chrI	477355	477697	peak159	2.556	4.88e-09	-0.691	0.597	EE_repressedEnhancer	L3_H3K27me3Repressed	YA_H3K27me3Repressed
chrI	477842	478143	peak160	0.478	0.155	-0.187	0.859	EE_repressedEnhancer	L3_H3K27me3Repressed	YA_H3K27me3Repressed
chrI	478863	479115	peak161	2.121	3.04e-05	-1.258	0.369	EE_repressedEnhancer	L3_heterochromatin	YA_H3K27me3Repressed
chrI	484251	485052	peak162	0.5	0.205	-1.026	0.271	EE_H3K27me3Repressed	L3_H3K27me3Repressed	YA_H3K27me3Repressed
chrI	486237	486678	peak163	0.179	0.652	-0.802	0.473	EE_H3K27me3Repressed	L3_heterochromatin	YA_H3K27me3Repressed
chrI	488305	488521	peak164	-1.521	0.000123	-0.607	0.61	EE_promoterTSS	L3_promoterTSS	YA_promoterTSS
chrI	489855	490097	peak165	-0.86	0.0192	-0.444	0.778	EE_transcribedGeneBody	L3_transcribedGeneBody	YA_activeEnhancer
chrI	491296	491536	peak166	0.698	0.146	-1.517	0.15	EE_heterochromatin	L3_H3K27me3Repressed	YA_transcribedGeneBody
chrI	491793	492172	peak167	-0.398	0.407	-0.611	0.617	EE_heterochromatin	L3_H3K27me3Repressed	YA_transcribedGeneBody
chrI	492716	493505	peak168	-0.056	0.938	-0.708	0.49	EE_heterochromatin	L3_heterochromatin	YA_transcribedGeneBody
chrI	495063	495870	peak169	2.288	2.78e-08	-2.272	0.00123	EE_heterochromatin	L3_heterochromatin	YA_transcribedGeneBody
chrI	501275	501454	peak170	3.034	1.07e-06	-2.445	0.0133	EE_lowSignal	L3_heterochromatin	YA_transcribedGeneBody
chrI	502462	502646	peak171	2.448	0.000154	-2.705	0.00416	EE_lowSignal	L3_heterochromatin	YA_transcribedGeneBody
chrI	507339	507735	peak172	-0.153	0.756	-0.565	0.629	EE_transcribedGeneBody	L3_lowSignal	YA_transcribedGeneBody
chrI	508939	509563	peak173	0.009	0.963	-1.055	0.251	EE_transcribedGeneBody	L3_lowSignal	YA_transcribedGeneBody
chrI	511126	511327	peak174	-0.278	0.601	-0.057	0.913	EE_transcribedGeneBody	L3_lowSignal	YA_lowSignal
chrI	512606	513006	peak175	1.703	0.000566	-1.393	0.117	EE_transcribedGeneBody	L3_transcribedGeneBody	YA_transcribedGeneBody
chrI	513233	513692	peak176	-0.099	0.902	-0.542	0.58	EE_transcribedGeneBody	L3_transcribedGeneBody	YA_transcribedGeneBody
chrI	514059	514211	peak177	2.337	0.000374	-2.347	0.0253	EE_transcribedGeneBody	L3_transcribedGeneBody	YA_promoterTSS
chrI	516589	516999	peak178	-1.676	4.76e-06	0.603	0.62	EE_promoterTSS	L3_transcribedGeneBody	YA_activeEnhancer
chrI	518144	518861	peak179	-1.577	1.05e-05	0.832	0.378	EE_promoterTSS	L3_promoterTSS	YA_activeEnhancer
chrI	521373	521735	peak180	-0.526	0.236	0.673	0.551	EE_repressedEnhancer	L3_repressedEnhancer	YA_H3K27me3Repressed
chrI	524232	524809	peak181	-1.096	0.00305	1.188	0.169	EE_repressedEnhancer	L3_lowSignal	YA_repressedEnhancer
chrI	525610	525857	peak182	0.978	0.0141	0.063	0.977	EE_repressedEnhancer	L3_repressedEnhancer	YA_H3K27me3Repressed
chrI	527279	527752	peak183	-1.638	9.03e-06	1.814	0.0148	EE_H3K27me3Repressed	L3_activeEnhancer	YA_H3K27me3Repressed
chrI	527895	528229	peak184	-1.765	2.03e-06	2.191	0.00193	EE_H3K27me3Repressed	L3_repressedEnhancer	YA_H3K27me3Repressed
chrI	529527	529772	peak185	-1.897	6.08e-07	1.454	0.0468	EE_H3K27me3Repressed	L3_heterochromatin	YA_H3K27me3Repressed
chrI	529853	530198	peak186	-1.38	0.000207	1.328	0.116	EE_H3K27me3Repressed	L3_lowSignal	YA_H3K27me3Repressed
chrI	530264	530692	peak187	-0.88	0.0218	1.149	0.179	EE_H3K27me3Repressed	L3_promoterTSS	YA_H3K27me3Repressed
chrI	532207	533171	peak188	-0.447	0.285	-0.114	0.939	NA	L3_promoterTSS	NA
chrI	535351	535545	peak189	-0.709	0.0404	-0.552	0.636	EE_promoterTSS	L3_promoterTSS	YA_promoterTSS
chrI	535943	537080	peak190	-1.03	0.00504	-0.331	0.775	EE_promoterTSS	L3_promoterTSS	YA_promoterTSS
chrI	537188	537405	peak191	-0.933	0.025	-0.566	0.622	EE_promoterTSS	L3_promoterTSS	YA_promoterTSS
chrI	538670	538912	peak192	0.606	0.198	-1.254	0.236	EE_promoterTSS	L3_transcribedGeneBody	YA_promoterTSS
chrI	542225	542459	peak193	0.32	0.562	0.491	0.807	EE_activeEnhancer	L3_transcribedGeneBody	YA_transcribedGeneBody
chrI	545331	545778	peak194	-0.626	0.119	-0.235	0.835	EE_repressedEnhancer	L3_transcribedGeneBody	YA_activeEnhancer
chrI	547163	547360	peak195	-0.825	0.0695	0.761	0.527	EE_repressedEnhancer	L3_activeEnhancer	YA_activeEnhancer
chrI	549254	549527	peak196	-0.589	0.144	-0.242	0.892	EE_lowSignal	L3_transcribedGeneBody	YA_activeEnhancer
chrI	549948	550392	peak197	0.203	0.833	-0.693	0.575	EE_H3K27me3Repressed	L3_transcribedGeneBody	YA_activeEnhancer
chrI	552658	552808	peak198	-0.382	0.599	0.332	0.92	EE_H3K27me3Repressed	L3_transcribedGeneBody	YA_transcribedGeneBody
chrI	553766	554255	peak199	0.294	0.551	-0.505	0.596	EE_H3K27me3Repressed	L3_transcribedGeneBody	YA_transcribedGeneBody
chrI	554906	555143	peak200	0.135	0.972	-0.703	0.677	EE_H3K27me3Repressed	L3_transcribedGeneBody	YA_transcribedGeneBody
chrI	555248	556404	peak201	-0.245	0.597	-0.409	0.723	EE_H3K27me3Repressed	L3_transcribedGeneBody	YA_transcribedGeneBody
chrI	556729	557469	peak202	-0.82	0.0337	1.225	0.187	EE_repressedEnhancer	L3_repressedEnhancer	YA_repressedEnhancer
chrI	562327	562557	peak203	0.479	0.277	0.078	0.971	EE_H3K27me3Repressed	L3_lowSignal	NA
chrI	562630	563372	peak204	-0.049	0.971	-0.085	0.948	EE_H3K27me3Repressed	L3_H3K27me3Repressed	YA_heterochromatin
chrI	564624	564767	peak205	1.598	0.00763	-0.746	0.565	EE_H3K27me3Repressed	L3_heterochromatin	YA_H3K27me3Repressed
chrI	564869	565206	peak206	0.486	0.5	-0.259	0.916	EE_heterochromatin	L3_heterochromatin	YA_H3K27me3Repressed
chrI	566269	566751	peak207	-0.053	0.95	0.356	0.709	EE_H3K27me3Repressed	L3_lowSignal	YA_heterochromatin
chrI	566883	567159	peak208	0.129	0.611	-0.08	0.89	EE_H3K27me3Repressed	L3_H3K27me3Repressed	YA_H3K27me3Repressed
chrI	570905	571121	peak209	0.745	0.0967	1.135	0.352	EE_activeEnhancer	L3_lowSignal	YA_lowSignal
chrI	573588	574776	peak210	-0.241	0.606	-0.325	0.787	EE_heterochromatin	L3_H3K27me3Repressed	YA_heterochromatin
chrI	574909	575410	peak211	-1.143	0.00375	0.429	0.68	EE_heterochromatin	L3_H3K27me3Repressed	YA_H3K27me3Repressed
chrI	585903	586144	peak212	1.801	0.00279	-1.467	0.427	EE_H3K27me3Repressed	L3_H3K27me3Repressed	YA_H3K27me3Repressed
chrI	592151	592305	peak213	0.032	0.898	-0.423	0.871	EE_lowSignal	L3_lowSignal	YA_heterochromatin
chrI	593455	593611	peak214	-0.489	0.404	0.282	0.762	EE_lowSignal	L3_heterochromatin	YA_heterochromatin
chrI	606539	607110	peak215	1.316	0.000478	-0.576	0.663	EE_lowSignal	L3_heterochromatin	YA_heterochromatin
chrI	607330	607561	peak216	0.603	0.191	-0.169	0.955	EE_lowSignal	L3_heterochromatin	YA_heterochromatin
chrI	613122	613498	peak217	0.49	0.31	-0.933	0.394	EE_lowSignal	L3_lowSignal	YA_repressedEnhancer
chrI	617975	618224	peak218	-1.106	0.00921	-0.241	0.892	EE_heterochromatin	L3_heterochromatin	YA_transcribedGeneBody
chrI	634017	634637	peak219	3.56	1.79e-09	-3.955	1.48e-06	EE_transcribedGeneBody	L3_transcribedGeneBody	YA_promoterTSS
chrI	637488	637754	peak220	0.176	0.477	-0.948	0.212	EE_promoterTSS	L3_transcribedGeneBody	YA_promoterTSS
chrI	638228	638711	peak221	-0.337	0.415	-1.195	0.177	EE_lowSignal	L3_repressedEnhancer	YA_activeEnhancer
chrI	644362	645016	peak222	3.665	4.53e-11	-3.287	0.000178	EE_H3K27me3Repressed	L3_heterochromatin	YA_H3K27me3Repressed
chrI	663296	663789	peak223	-1.227	0.00101	-0.242	0.858	EE_activeEnhancer	L3_promoterTSS	YA_promoterTSS
chrI	666425	666640	peak224	2.239	0.000582	-2.243	0.0284	EE_H3K27me3Repressed	L3_heterochromatin	YA_H3K27me3Repressed
chrI	681459	681642	peak225	3.346	5.26e-08	-0.747	0.669	EE_lowSignal	L3_H3K27me3Repressed	YA_repressedEnhancer
chrI	683497	683799	peak226	0.64	0.101	-1.113	0.276	EE_H3K27me3Repressed	L3_H3K27me3Repressed	YA_H3K27me3Repressed
chrI	702253	702724	peak227	2.232	3.33e-05	-2.381	0.00378	EE_transcribedGeneBody	L3_transcribedGeneBody	YA_transcribedGeneBody
chrI	702752	703080	peak228	0.132	0.961	-1.005	0.388	EE_transcribedGeneBody	L3_transcribedGeneBody	YA_transcribedGeneBody
chrI	703136	703493	peak229	-0.151	0.798	-0.462	0.654	EE_transcribedGeneBody	L3_transcribedGeneBody	YA_transcribedGeneBody
chrI	703699	703993	peak230	0.932	0.105	-1.537	0.178	EE_transcribedGeneBody	L3_transcribedGeneBody	YA_transcribedGeneBody
chrI	715372	715633	peak231	3.366	2.69e-08	-3.464	0.000189	EE_transcribedGeneBody	L3_transcribedGeneBody	YA_transcribedGeneBody
chrI	716569	716932	peak232	-1.646	6.17e-06	0.346	0.766	EE_promoterTSS	L3_promoterTSS	YA_activeEnhancer
chrI	719890	720079	peak233	-0.615	0.16	-0.467	0.719	EE_promoterTSS	L3_activeEnhancer	YA_activeEnhancer
chrI	720264	720482	peak234	0.343	0.442	-0.098	0.91	EE_activeEnhancer	L3_repressedEnhancer	YA_activeEnhancer
chrI	730549	730725	peak235	1.579	0.00214	-1.753	0.0672	EE_transcribedGeneBody	L3_heterochromatin	YA_transcribedGeneBody
chrI	732090	732326	peak236	0.766	0.0644	-0.782	0.476	EE_lowSignal	L3_heterochromatin	YA_H3K27me3Repressed
chrI	733315	733484	peak237	0.178	0.707	1.245	0.376	EE_H3K27me3Repressed	L3_heterochromatin	YA_heterochromatin
chrI	736744	737606	peak238	0.984	0.00916	-1.248	0.147	EE_H3K27me3Repressed	L3_heterochromatin	YA_H3K27me3Repressed
chrI	743119	743354	peak239	2.305	0.000259	-2.007	0.0915	EE_H3K27me3Repressed	L3_H3K27me3Repressed	YA_H3K27me3Repressed
chrI	746792	747143	peak240	0.615	0.252	-0.676	0.6	EE_H3K27me3Repressed	L3_H3K27me3Repressed	YA_heterochromatin
chrI	754537	754872	peak241	-1.55	2.88e-05	-0.869	0.376	EE_lowSignal	L3_lowSignal	YA_repressedEnhancer
chrI	756854	757227	peak242	-1.433	9.47e-05	0.996	0.279	EE_repressedEnhancer	L3_lowSignal	YA_H3K27me3Repressed
chrI	757227	757704	peak243	-1.433	9.47e-05	0.996	0.279	EE_repressedEnhancer	NA	YA_H3K27me3Repressed
chrI	762387	762784	peak244	1.034	0.0267	-1.259	0.255	EE_H3K27me3Repressed	L3_heterochromatin	YA_H3K27me3Repressed
chrI	763284	763771	peak245	-1.781	1.71e-06	1.015	0.318	EE_H3K27me3Repressed	L3_lowSignal	YA_heterochromatin
chrI	767564	767805	peak246	0.695	0.0996	-0.355	0.815	EE_H3K27me3Repressed	L3_H3K27me3Repressed	YA_H3K27me3Repressed
chrI	772932	773137	peak247	1.072	0.00937	-1.089	0.168	EE_H3K27me3Repressed	L3_heterochromatin	YA_heterochromatin
chrI	775192	775500	peak248	-0.331	0.639	-0.362	0.797	EE_H3K27me3Repressed	L3_H3K27me3Repressed	YA_heterochromatin
chrI	776159	776310	peak249	0.681	0.124	-0.414	0.569	EE_H3K27me3Repressed	L3_H3K27me3Repressed	YA_heterochromatin
chrI	782334	782641	peak250	2.061	1.98e-05	-1.91	0.0748	EE_repressedEnhancer	L3_lowSignal	YA_H3K27me3Repressed
chrI	783468	783690	peak251	1.745	0.00213	-1.479	0.349	EE_repressedEnhancer	L3_H3K27me3Repressed	YA_heterochromatin
chrI	784032	784190	peak252	0.999	0.121	-0.097	0.984	EE_lowSignal	L3_lowSignal	YA_heterochromatin
chrI	785281	785468	peak253	1.01	0.0681	-0.11	0.99	EE_lowSignal	L3_lowSignal	YA_heterochromatin
chrI	788110	788247	peak254	-0.324	0.381	1.011	0.449	EE_repressedEnhancer	L3_repressedEnhancer	YA_H3K27me3Repressed
chrI	789438	789678	peak255	0.722	0.0962	0.029	0.958	EE_repressedEnhancer	L3_H3K27me3Repressed	YA_H3K27me3Repressed
chrI	790397	790601	peak256	0.79	0.0213	-0.13	0.997	EE_lowSignal	L3_H3K27me3Repressed	YA_heterochromatin
chrI	791109	791508	peak257	1.805	5.75e-05	-1.331	0.192	EE_H3K27me3Repressed	L3_H3K27me3Repressed	YA_heterochromatin
chrI	795764	795944	peak258	0.569	0.496	0.822	0.511	EE_repressedEnhancer	L3_H3K27me3Repressed	YA_heterochromatin
chrI	796463	796888	peak259	-0.028	0.951	-0.031	0.972	EE_H3K27me3Repressed	L3_lowSignal	YA_H3K27me3Repressed
chrI	798346	798582	peak260	0.056	0.962	1.065	0.414	EE_H3K27me3Repressed	L3_H3K27me3Repressed	YA_H3K27me3Repressed
chrI	799004	799500	peak261	0.405	0.452	-0.891	0.432	EE_repressedEnhancer	L3_heterochromatin	YA_heterochromatin
chrI	801124	801523	peak262	0.654	0.103	-0.819	0.448	EE_H3K27me3Repressed	L3_heterochromatin	YA_heterochromatin
chrI	801947	802238	peak263	0.271	0.365	-0.808	0.416	EE_lowSignal	L3_H3K27me3Repressed	YA_H3K27me3Repressed
chrI	802937	803152	peak264	0.164	0.679	0.043	0.983	EE_H3K27me3Repressed	L3_H3K27me3Repressed	YA_heterochromatin
chrI	803730	804034	peak265	0.344	0.538	-1.012	0.339	EE_H3K27me3Repressed	L3_heterochromatin	YA_heterochromatin
chrI	806777	807075	peak266	-0.328	0.595	0.762	0.477	EE_lowSignal	L3_lowSignal	YA_heterochromatin
chrI	809783	810479	peak267	0.842	0.037	-0.987	0.359	NA	L3_heterochromatin	YA_heterochromatin
chrI	810852	810980	peak268	2.069	6.26e-05	-1.485	0.416	EE_repressedEnhancer	L3_promoterTSS	YA_H3K27me3Repressed
chrI	812226	812739	peak269	-0.318	0.55	0.79	0.485	EE_repressedEnhancer	L3_lowSignal	YA_lowSignal
chrI	813976	814164	peak270	1.022	0.0626	0.51	0.778	EE_repressedEnhancer	L3_transcribedGeneBody	YA_H3K27me3Repressed
chrI	814430	814724	peak271	-0.121	0.94	-0.154	0.881	EE_H3K27me3Repressed	L3_transcribedGeneBody	YA_H3K27me3Repressed
chrI	815957	816472	peak272	-0.99	0.00733	1.129	0.31	EE_heterochromatin	L3_transcribedGeneBody	YA_H3K27me3Repressed
chrI	819388	820006	peak273	-0.142	0.776	0.04	0.959	EE_repressedEnhancer	L3_transcribedGeneBody	YA_H3K27me3Repressed
chrI	820257	820409	peak274	0.589	0.928	-0.831	0.816	EE_repressedEnhancer	L3_transcribedGeneBody	YA_H3K27me3Repressed
chrI	823811	824115	peak275	1.438	0.00104	-0.401	0.608	EE_H3K27me3Repressed	L3_transcribedGeneBody	YA_heterochromatin
chrI	826191	826597	peak276	-0.227	0.58	0.47	0.685	EE_repressedEnhancer	L3_transcribedGeneBody	YA_H3K27me3Repressed
chrI	827407	827819	peak277	0.016	0.924	0.181	0.934	EE_H3K27me3Repressed	L3_transcribedGeneBody	YA_H3K27me3Repressed
chrI	828463	829114	peak278	-0.484	0.273	-0.592	0.582	NA	L3_transcribedGeneBody	YA_H3K27me3Repressed
chrI	829226	829494	peak279	-0.54	0.331	-0.374	0.805	EE_H3K27me3Repressed	L3_transcribedGeneBody	YA_H3K27me3Repressed
chrI	829948	830148	peak280	0.22	0.716	0.148	0.807	EE_repressedEnhancer	L3_transcribedGeneBody	YA_H3K27me3Repressed
chrI	834359	834978	peak281	-0.275	0.616	-0.101	0.947	EE_H3K27me3Repressed	L3_transcribedGeneBody	YA_H3K27me3Repressed
chrI	836047	836344	peak282	-1.9	2.26e-06	2.668	0.00165	EE_H3K27me3Repressed	L3_repressedEnhancer	YA_H3K27me3Repressed
chrI	838528	839078	peak283	0.505	0.246	-0.571	0.582	EE_heterochromatin	L3_H3K27me3Repressed	YA_H3K27me3Repressed
chrI	840109	840846	peak284	-0.696	0.0823	0.721	0.525	EE_heterochromatin	L3_heterochromatin	YA_H3K27me3Repressed
chrI	841456	841619	peak285	-0.648	0.21	0.404	0.781	EE_heterochromatin	L3_lowSignal	YA_H3K27me3Repressed
chrI	850258	850545	peak286	0.17	0.719	-0.052	0.884	EE_H3K27me3Repressed	L3_promoterTSS	YA_repressedEnhancer
chrI	851000	851622	peak287	-0.275	0.613	-0.367	0.739	EE_H3K27me3Repressed	L3_activeEnhancer	YA_repressedEnhancer
chrI	851701	852890	peak288	-1.975	4.9e-08	0.366	0.752	NA	L3_activeEnhancer	YA_activeEnhancer
chrI	875711	876267	peak289	0.017	0.968	-1.01	0.303	EE_H3K27me3Repressed	L3_transcribedGeneBody	YA_transcribedGeneBody
chrI	881401	882046	peak290	-2.662	1.93e-13	0.911	0.318	EE_repressedEnhancer	L3_promoterTSS	YA_activeEnhancer
chrI	882422	883219	peak291	-3.507	3.89e-21	0.554	0.589	EE_repressedEnhancer	L3_transcribedGeneBody	YA_activeEnhancer
chrI	883723	884035	peak292	-1.311	0.000521	0.543	0.619	EE_H3K27me3Repressed	L3_transcribedGeneBody	YA_activeEnhancer
chrI	887467	887845	peak293	-0.068	0.978	-0.607	0.553	EE_H3K27me3Repressed	L3_heterochromatin	YA_H3K27me3Repressed
chrI	912772	912975	peak294	2.56	1.95e-06	-1.282	0.252	EE_H3K27me3Repressed	L3_heterochromatin	YA_heterochromatin
chrI	913810	914112	peak295	1.845	0.000384	-1.209	0.524	EE_lowSignal	L3_heterochromatin	YA_heterochromatin
chrI	915300	915417	peak296	-0.624	0.436	0.134	0.993	EE_H3K27me3Repressed	L3_lowSignal	YA_heterochromatin
chrI	915666	916113	peak297	0.227	0.537	-0.137	0.875	EE_H3K27me3Repressed	L3_lowSignal	YA_heterochromatin
chrI	917191	917284	peak298	2.532	6.97e-05	-2.388	0.0206	EE_lowSignal	L3_heterochromatin	YA_heterochromatin
chrI	920447	920915	peak299	1.095	0.0125	-0.925	0.4	EE_H3K27me3Repressed	L3_heterochromatin	YA_H3K27me3Repressed
chrI	920915	921262	peak300	1.095	0.0125	-0.925	0.4	EE_H3K27me3Repressed	L3_heterochromatin	YA_H3K27me3Repressed
chrI	927047	927698	peak301	0.447	0.285	-0.944	0.31	EE_H3K27me3Repressed	L3_heterochromatin	YA_H3K27me3Repressed
chrI	929558	929885	peak302	-1.157	0.00367	0.582	0.746	EE_H3K27me3Repressed	L3_H3K27me3Repressed	YA_heterochromatin
chrI	935089	935346	peak303	-0.44	0.218	1.353	0.218	EE_repressedEnhancer	L3_lowSignal	YA_H3K27me3Repressed
chrI	935473	935668	peak304	0.005	0.99	0	0.997	EE_repressedEnhancer	L3_lowSignal	YA_H3K27me3Repressed
chrI	939623	939889	peak305	0.627	0.229	-0.45	0.613	EE_lowSignal	L3_lowSignal	YA_heterochromatin
chrI	943007	943443	peak306	-0.06	0.994	-0.126	0.865	EE_H3K27me3Repressed	L3_H3K27me3Repressed	YA_heterochromatin
chrI	943700	944084	peak307	0.62	0.283	-0.426	0.743	EE_H3K27me3Repressed	L3_lowSignal	YA_heterochromatin
chrI	944240	944666	peak308	0.446	0.307	-0.528	0.686	EE_H3K27me3Repressed	L3_lowSignal	YA_heterochromatin
chrI	945081	945642	peak309	0.215	0.616	-0.414	0.689	EE_H3K27me3Repressed	L3_H3K27me3Repressed	YA_H3K27me3Repressed
chrI	945922	946622	peak310	-0.481	0.199	-0.698	0.494	EE_H3K27me3Repressed	L3_repressedEnhancer	YA_H3K27me3Repressed
chrI	949136	949394	peak311	0.346	0.744	-1.007	0.475	EE_H3K27me3Repressed	L3_H3K27me3Repressed	YA_H3K27me3Repressed
chrI	954278	954671	peak312	-1.533	3.51e-05	1.041	0.266	EE_transcribedGeneBody	L3_transcribedGeneBody	YA_H3K27me3Repressed
chrI	955212	955780	peak313	0.51	0.211	0.609	0.53	EE_activeEnhancer	L3_activeEnhancer	YA_repressedEnhancer
chrI	955840	957029	peak314	-0.324	0.457	0.202	0.871	EE_transcribedGeneBody	NA	YA_heterochromatin
chrI	957223	957797	peak315	-0.278	0.539	0.308	0.821	EE_activeEnhancer	L3_activeEnhancer	YA_H3K27me3Repressed
chrI	960016	960228	peak316	1.234	0.00579	0.216	0.821	EE_repressedEnhancer	L3_repressedEnhancer	YA_H3K27me3Repressed
chrI	960540	960834	peak317	0.622	0.163	-0.297	0.765	EE_repressedEnhancer	L3_H3K27me3Repressed	YA_H3K27me3Repressed
chrI	961292	961591	peak318	-0.315	0.526	0.527	0.61	EE_repressedEnhancer	L3_activeEnhancer	YA_H3K27me3Repressed
chrI	962619	962901	peak319	0.774	0.0443	-0.678	0.58	EE_H3K27me3Repressed	L3_lowSignal	YA_H3K27me3Repressed
chrI	963120	963632	peak320	0.114	0.742	0.428	0.827	EE_lowSignal	L3_lowSignal	YA_heterochromatin
chrI	963874	964214	peak321	0.538	0.203	-0.276	0.92	EE_H3K27me3Repressed	L3_lowSignal	YA_H3K27me3Repressed
chrI	968687	969616	peak322	0.076	0.853	-0.026	0.977	EE_lowSignal	L3_transcribedGeneBody	YA_H3K27me3Repressed
chrI	973038	973410	peak323	-0.756	0.0476	-0.456	0.688	EE_activeEnhancer	L3_transcribedGeneBody	YA_repressedEnhancer
chrI	973771	974000	peak324	-0.772	0.0412	-0.862	0.376	EE_lowSignal	L3_transcribedGeneBody	YA_lowSignal
chrI	978616	978905	peak325	-0.737	0.0743	1.511	0.179	EE_lowSignal	L3_H3K27me3Repressed	YA_heterochromatin
chrI	979543	979751	peak326	-0.955	0.0234	1.58	0.168	EE_lowSignal	L3_lowSignal	YA_heterochromatin
chrI	981517	981863	peak327	2.441	1.58e-07	0.91	0.571	EE_repressedEnhancer	L3_lowSignal	YA_heterochromatin
chrI	984313	985231	peak328	-0.646	0.0939	0.079	0.957	EE_lowSignal	L3_lowSignal	YA_heterochromatin
chrI	985893	986108	peak329	-0.632	0.186	1.024	0.43	EE_lowSignal	L3_lowSignal	YA_H3K27me3Repressed
chrI	986779	986986	peak330	-1.235	0.00226	0.587	0.732	EE_H3K27me3Repressed	L3_lowSignal	YA_lowSignal
chrI	988906	989459	peak331	-1.054	0.00452	1.492	0.079	EE_repressedEnhancer	L3_promoterTSS	NA
chrI	989744	990620	peak332	0.276	0.533	-0.638	0.561	EE_transcribedGeneBody	L3_transcribedGeneBody	YA_H3K27me3Repressed
chrI	990942	991668	peak333	0.373	0.4	-0.264	0.872	EE_lowSignal	L3_transcribedGeneBody	YA_heterochromatin
chrI	998885	999818	peak334	-3.01	2.68e-16	2.649	6.33e-05	EE_H3K27me3Repressed	L3_activeEnhancer	YA_repressedEnhancer
chrI	1000921	1001216	peak335	-1.495	4.51e-05	2.265	0.00152	EE_repressedEnhancer	L3_repressedEnhancer	YA_repressedEnhancer
chrI	1004090	1004611	peak336	0.996	0.0263	-1.138	0.31	EE_H3K27me3Repressed	L3_lowSignal	YA_heterochromatin
chrI	1008030	1008337	peak337	3.93	2.84e-12	-3.122	0.000189	EE_H3K27me3Repressed	L3_heterochromatin	YA_H3K27me3Repressed
chrI	1015179	1015539	peak338	1.676	0.0237	-3.144	0.000689	EE_H3K27me3Repressed	L3_H3K27me3Repressed	YA_H3K27me3Repressed
chrI	1016942	1017163	peak339	-0.35	0.535	-0.976	0.335	EE_H3K27me3Repressed	L3_heterochromatin	YA_H3K27me3Repressed
chrI	1030834	1031041	peak340	2.353	0.000334	-2.848	0.00218	EE_transcribedGeneBody	L3_transcribedGeneBody	YA_activeEnhancer
chrI	1031992	1032292	peak341	0.454	0.904	-1.524	0.196	EE_transcribedGeneBody	L3_transcribedGeneBody	YA_promoterTSS
chrI	1034274	1034482	peak342	-0.354	0.35	-0.625	0.577	EE_promoterTSS	L3_promoterTSS	YA_activeEnhancer
chrI	1052540	1052882	peak343	2.194	0.000893	-2.613	0.00462	EE_heterochromatin	L3_activeEnhancer	YA_activeEnhancer
chrI	1053569	1053930	peak344	-2.1	2.33e-08	0.533	0.638	EE_activeEnhancer	L3_activeEnhancer	YA_promoterTSS
chrI	1061875	1062672	peak345	-3.501	5.52e-21	0.841	0.366	EE_heterochromatin	L3_transcribedGeneBody	YA_activeEnhancer
chrI	1067962	1068751	peak346	-2.916	8.8e-16	0.602	0.551	EE_repressedEnhancer	L3_transcribedGeneBody	YA_activeEnhancer
chrI	1068664	1068998	peak347	-2.916	8.8e-16	0.602	0.551	EE_repressedEnhancer	L3_promoterTSS	YA_activeEnhancer
chrI	1069167	1069550	peak348	-2.88	4.85e-15	1.11	0.198	EE_H3K27me3Repressed	L3_promoterTSS	YA_activeEnhancer
chrI	1069552	1070281	peak349	-3.061	7.97e-17	0.579	0.572	EE_H3K27me3Repressed	L3_activeEnhancer	YA_activeEnhancer
chrI	1077287	1077487	peak350	0.689	0.626	0.162	0.886	EE_activeEnhancer	L3_activeEnhancer	YA_lowSignal
chrI	1078590	1078706	peak351	-0.248	0.989	0.132	0.981	EE_transcribedGeneBody	L3_lowSignal	YA_transcribedGeneBody
chrI	1090340	1090842	peak352	1.792	1.05e-05	-1.025	0.218	EE_H3K27me3Repressed	L3_H3K27me3Repressed	YA_H3K27me3Repressed
chrI	1095975	1096689	peak353	0.248	0.685	-0.68	0.541	NA	L3_transcribedGeneBody	YA_H3K27me3Repressed
chrI	1099060	1099398	peak354	-0.171	0.604	0.677	0.663	EE_H3K27me3Repressed	L3_transcribedGeneBody	YA_repressedEnhancer
chrI	1100596	1100976	peak355	-0.881	0.0293	1.442	0.159	EE_repressedEnhancer	L3_activeEnhancer	YA_activeEnhancer
chrI	1109128	1109710	peak356	2.025	1.11e-05	-1.398	0.222	EE_H3K27me3Repressed	L3_H3K27me3Repressed	YA_heterochromatin
chrI	1110525	1110799	peak357	1.844	9.06e-06	-0.502	0.838	EE_repressedEnhancer	L3_lowSignal	YA_H3K27me3Repressed
chrI	1124939	1125174	peak358	4.487	6.76e-14	-1.989	0.0481	EE_repressedEnhancer	L3_H3K27me3Repressed	YA_heterochromatin
chrI	1126223	1126587	peak359	1.439	0.000644	0.522	0.682	EE_repressedEnhancer	L3_H3K27me3Repressed	YA_H3K27me3Repressed
chrI	1126961	1127400	peak360	0.424	0.33	0.125	0.896	EE_repressedEnhancer	L3_lowSignal	YA_H3K27me3Repressed
chrI	1128143	1128403	peak361	1.421	0.00186	-0.22	0.747	EE_repressedEnhancer	L3_H3K27me3Repressed	YA_H3K27me3Repressed
chrI	1130760	1131036	peak362	1.199	0.00101	-0.809	0.429	EE_repressedEnhancer	L3_heterochromatin	YA_H3K27me3Repressed
chrI	1131261	1131413	peak363	0.846	0.0573	-0.464	0.874	EE_repressedEnhancer	L3_heterochromatin	YA_heterochromatin
chrI	1131733	1132313	peak364	1.3	0.000786	-0.99	0.384	EE_repressedEnhancer	L3_heterochromatin	YA_H3K27me3Repressed
chrI	1133499	1133690	peak365	1.214	0.00281	-1.306	0.233	EE_repressedEnhancer	L3_heterochromatin	YA_heterochromatin
chrI	1135464	1135768	peak366	2.332	3.67e-06	-0.595	0.596	EE_repressedEnhancer	L3_lowSignal	YA_H3K27me3Repressed
chrI	1147112	1147358	peak367	3.504	1.18e-08	-1.229	0.324	EE_transcribedGeneBody	L3_lowSignal	YA_transcribedGeneBody
chrI	1149856	1150170	peak368	2.763	1.2e-05	-1.54	0.266	EE_transcribedGeneBody	L3_transcribedGeneBody	YA_promoterTSS
chrI	1155497	1155662	peak369	1.151	0.256	-2.199	0.0715	EE_promoterTSS	L3_transcribedGeneBody	YA_promoterTSS
chrI	1156068	1156295	peak370	-0.781	0.0265	-0.802	0.49	EE_promoterTSS	L3_promoterTSS	YA_promoterTSS
chrI	1156572	1157130	peak371	-0.136	0.816	-0.583	0.593	EE_promoterTSS	L3_promoterTSS	YA_promoterTSS
chrI	1157491	1157799	peak372	0.308	0.771	-1.717	0.0357	EE_transcribedGeneBody	L3_transcribedGeneBody	YA_promoterTSS
chrI	1157799	1158089	peak373	0.308	0.771	-1.717	0.0357	EE_transcribedGeneBody	L3_transcribedGeneBody	YA_promoterTSS
chrI	1159209	1160433	peak374	1.242	0.00189	-0.811	0.351	EE_heterochromatin	L3_lowSignal	YA_transcribedGeneBody
chrI	1166369	1166602	peak375	0.568	0.257	-1.047	0.277	EE_transcribedGeneBody	L3_transcribedGeneBody	YA_transcribedGeneBody
chrI	1167575	1168028	peak376	2.134	1.43e-05	-2.596	0.00254	EE_repressedEnhancer	L3_lowSignal	YA_transcribedGeneBody
chrI	1175408	1175608	peak377	-1.413	0.655	-1.934	0.0588	EE_promoterTSS	L3_promoterTSS	YA_promoterTSS
chrI	1180293	1180615	peak378	0.997	0.0766	-1.295	0.158	EE_transcribedGeneBody	L3_transcribedGeneBody	YA_promoterTSS
chrI	1180687	1180883	peak379	-0.184	0.95	-0.471	0.671	EE_transcribedGeneBody	L3_transcribedGeneBody	YA_promoterTSS
chrI	1213230	1213975	peak380	2.27	5.01e-08	-1.011	0.251	EE_lowSignal	L3_transcribedGeneBody	YA_transcribedGeneBody
chrI	1214030	1214291	peak381	3.388	3.66e-08	-0.809	0.617	EE_lowSignal	L3_transcribedGeneBody	YA_transcribedGeneBody
chrI	1217855	1218095	peak382	1.885	0.00193	0.563	0.591	EE_heterochromatin	L3_heterochromatin	YA_transcribedGeneBody
chrI	1218483	1218751	peak383	0.157	0.697	-0.926	0.44	EE_heterochromatin	L3_heterochromatin	YA_transcribedGeneBody
chrI	1224591	1224746	peak384	0.39	0.358	-0.993	0.361	EE_transcribedGeneBody	L3_transcribedGeneBody	YA_transcribedGeneBody
chrI	1225161	1225544	peak385	0.398	0.596	-1.127	0.302	EE_transcribedGeneBody	L3_transcribedGeneBody	YA_promoterTSS
chrI	1226605	1226844	peak386	0.021	0.924	-0.546	0.572	EE_transcribedGeneBody	L3_activeEnhancer	YA_activeEnhancer
chrI	1227846	1228207	peak387	-1.021	0.00321	-0.673	0.566	EE_activeEnhancer	L3_activeEnhancer	YA_promoterTSS
chrI	1229158	1229581	peak388	-1.107	0.00252	-0.207	0.87	EE_promoterTSS	L3_transcribedGeneBody	YA_promoterTSS
chrI	1230201	1230918	peak389	-0.702	0.0684	0.714	0.533	EE_H3K27me3Repressed	NA	YA_activeEnhancer
chrI	1241332	1241711	peak390	5.005	3.32e-17	-2.876	0.00193	EE_activeEnhancer	L3_lowSignal	YA_transcribedGeneBody
chrI	1251331	1251924	peak391	-0.779	0.0418	0.815	0.418	EE_activeEnhancer	L3_activeEnhancer	YA_activeEnhancer
chrI	1255918	1256385	peak392	-2.297	8.37e-10	2.475	0.00106	EE_heterochromatin	L3_lowSignal	YA_transcribedGeneBody
chrI	1258546	1258795	peak393	1.092	0.19	-0.353	0.869	EE_heterochromatin	L3_H3K27me3Repressed	YA_transcribedGeneBody
chrI	1261491	1261831	peak394	-1.079	0.00383	1.075	0.314	EE_H3K27me3Repressed	L3_transcribedGeneBody	YA_H3K27me3Repressed
chrI	1270798	1271538	peak395	-2.414	3.8e-11	0.995	0.271	EE_H3K27me3Repressed	L3_transcribedGeneBody	YA_H3K27me3Repressed
chrI	1272528	1272740	peak396	-1.198	0.00234	1.387	0.17	EE_lowSignal	L3_promoterTSS	YA_H3K27me3Repressed
chrI	1273757	1274290	peak397	-2.261	4.91e-10	0.112	0.943	EE_lowSignal	L3_activeEnhancer	YA_H3K27me3Repressed
chrI	1285461	1285608	peak398	0.929	0.0933	-0.558	0.642	EE_lowSignal	L3_heterochromatin	YA_heterochromatin
chrI	1288715	1289039	peak399	0.483	0.228	0.508	0.723	EE_activeEnhancer	L3_lowSignal	YA_H3K27me3Repressed
chrI	1291950	1292188	peak400	-0.452	0.508	-0.413	0.758	EE_H3K27me3Repressed	L3_transcribedGeneBody	YA_repressedEnhancer
chrI	1293566	1293767	peak401	0.91	0.0102	-0.079	0.664	EE_lowSignal	L3_transcribedGeneBody	YA_lowSignal
chrI	1295518	1295745	peak402	0.544	0.601	0.048	0.999	EE_activeEnhancer	L3_activeEnhancer	YA_lowSignal
chrI	1301347	1301774	peak403	-1.243	0.000545	-0.266	0.841	EE_H3K27me3Repressed	L3_activeEnhancer	YA_activeEnhancer
chrI	1309402	1309528	peak404	-0.282	0.968	0.487	0.908	EE_heterochromatin	L3_transcribedGeneBody	YA_transcribedGeneBody
chrI	1310918	1311340	peak405	0.827	0.0377	-0.121	0.948	EE_repressedEnhancer	L3_transcribedGeneBody	YA_transcribedGeneBody
chrI	1315347	1315800	peak406	-0.973	0.01	1.177	0.205	EE_repressedEnhancer	L3_transcribedGeneBody	YA_repressedEnhancer
chrI	1316638	1317347	peak407	-0.07	0.88	-0.073	0.942	EE_H3K27me3Repressed	L3_transcribedGeneBody	NA
chrI	1320319	1320551	peak408	0.39	0.419	-0.08	0.984	EE_H3K27me3Repressed	L3_transcribedGeneBody	YA_transcribedGeneBody
chrI	1321775	1322263	peak409	0.152	0.731	-0.73	0.52	EE_heterochromatin	L3_transcribedGeneBody	YA_transcribedGeneBody
chrI	1327944	1328118	peak410	0.243	0.327	-0.008	0.87	EE_H3K27me3Repressed	L3_transcribedGeneBody	YA_H3K27me3Repressed
chrI	1331165	1331360	peak411	-0.54	0.297	-0.317	0.719	EE_H3K27me3Repressed	L3_repressedEnhancer	YA_repressedEnhancer
chrI	1333190	1333418	peak412	3.072	7.33e-07	-2.734	0.00293	EE_H3K27me3Repressed	L3_heterochromatin	YA_H3K27me3Repressed
chrI	1334141	1334906	peak413	5.538	4.33e-21	-4.453	4.08e-08	EE_lowSignal	L3_heterochromatin	YA_heterochromatin
chrI	1340053	1340308	peak414	-0.236	0.612	0.177	0.983	EE_promoterTSS	L3_promoterTSS	YA_activeEnhancer
chrI	1340440	1341530	peak415	1.486	0.00043	-1.048	0.294	EE_promoterTSS	L3_transcribedGeneBody	YA_promoterTSS
chrI	1342064	1342553	peak416	0.034	0.943	-0.813	0.414	EE_transcribedGeneBody	L3_transcribedGeneBody	YA_transcribedGeneBody
chrI	1342430	1342782	peak417	0.034	0.943	-0.813	0.414	EE_transcribedGeneBody	L3_transcribedGeneBody	YA_transcribedGeneBody
chrI	1358143	1358342	peak418	1.37	0.00195	-0.689	0.448	EE_transcribedGeneBody	L3_transcribedGeneBody	YA_promoterTSS
chrI	1361209	1361608	peak419	-2.903	4.85e-15	0.529	0.629	EE_activeEnhancer	L3_promoterTSS	YA_activeEnhancer
chrI	1365382	1365597	peak420	-0.544	0.406	1.729	0.165	EE_activeEnhancer	L3_promoterTSS	YA_promoterTSS
chrI	1378541	1378790	peak421	0.534	0.0362	-0.858	0.311	EE_transcribedGeneBody	L3_transcribedGeneBody	YA_transcribedGeneBody
chrI	1392533	1393106	peak422	-0.536	0.202	0.663	0.568	EE_promoterTSS	L3_promoterTSS	YA_promoterTSS
chrI	1402382	1402792	peak423	0.917	0.0226	-0.448	0.583	EE_transcribedGeneBody	L3_transcribedGeneBody	YA_transcribedGeneBody
chrI	1409968	1410113	peak424	0.127	0.706	-0.214	0.934	EE_lowSignal	L3_lowSignal	YA_lowSignal
chrI	1411498	1411655	peak425	0.538	0.164	-0.175	0.71	EE_transcribedGeneBody	L3_H3K27me3Repressed	YA_transcribedGeneBody
chrI	1416086	1416309	peak426	-1.534	5.47e-05	-0.526	0.672	EE_promoterTSS	L3_promoterTSS	YA_promoterTSS
chrI	1421076	1421296	peak427	0.034	0.898	-0.383	0.791	EE_transcribedGeneBody	L3_transcribedGeneBody	YA_transcribedGeneBody
chrI	1425185	1425461	peak428	1.273	0.0112	-1.351	0.326	EE_activeEnhancer	L3_transcribedGeneBody	YA_repressedEnhancer
chrI	1430588	1431141	peak429	5.306	1.89e-19	-4.259	1.65e-07	EE_transcribedGeneBody	L3_transcribedGeneBody	YA_lowSignal
chrI	1435154	1435482	peak430	-1.829	7.28e-07	0.911	0.381	EE_promoterTSS	L3_promoterTSS	YA_activeEnhancer
chrI	1435504	1435809	peak431	-1.421	0.000107	-0.297	0.813	EE_promoterTSS	L3_promoterTSS	YA_activeEnhancer
chrI	1444111	1444576	peak432	-2.816	3.99e-14	0.551	0.61	EE_activeEnhancer	L3_promoterTSS	YA_activeEnhancer
chrI	1446551	1446857	peak433	-0.932	0.011	-0.751	0.436	EE_repressedEnhancer	L3_repressedEnhancer	YA_activeEnhancer
chrI	1446724	1447616	peak434	-0.932	0.011	-0.751	0.436	EE_lowSignal	L3_repressedEnhancer	NA
chrI	1449594	1449765	peak435	-0.593	0.318	-0.342	0.792	EE_H3K27me3Repressed	L3_heterochromatin	YA_H3K27me3Repressed
chrI	1451493	1451803	peak436	1.849	6.82e-06	-1.033	0.355	EE_repressedEnhancer	L3_heterochromatin	YA_transcribedGeneBody
chrI	1453339	1453495	peak437	3.316	8.14e-08	-1.766	0.12	EE_heterochromatin	L3_H3K27me3Repressed	YA_transcribedGeneBody
chrI	1455257	1455651	peak438	0.063	0.835	-0.929	0.309	EE_H3K27me3Repressed	L3_heterochromatin	YA_transcribedGeneBody
chrI	1459024	1459259	peak439	-1.326	0.00046	0.666	0.636	EE_H3K27me3Repressed	L3_activeEnhancer	YA_transcribedGeneBody
chrI	1470968	1471375	peak440	-0.336	0.361	0.716	0.597	EE_repressedEnhancer	L3_lowSignal	YA_H3K27me3Repressed
chrI	1481446	1481918	peak441	-1.148	0.00172	-0.028	0.992	NA	L3_activeEnhancer	YA_repressedEnhancer
chrI	1482856	1483012	peak442	-0.157	0.882	0.292	0.842	EE_transcribedGeneBody	L3_transcribedGeneBody	YA_transcribedGeneBody
chrI	1511197	1511775	peak443	3.267	4.59e-08	-2.366	0.019	EE_transcribedGeneBody	L3_transcribedGeneBody	YA_transcribedGeneBody
chrI	1529237	1529638	peak444	4.616	1.14e-14	-2.891	0.00152	EE_transcribedGeneBody	L3_transcribedGeneBody	YA_transcribedGeneBody
chrI	1535696	1535945	peak445	0.314	0.448	-0.375	0.883	EE_H3K27me3Repressed	NA	YA_transcribedGeneBody
chrI	1540471	1540869	peak446	-2.317	1.99e-10	0.649	0.539	EE_activeEnhancer	L3_activeEnhancer	YA_activeEnhancer
chrI	1548180	1548488	peak447	0.437	0.283	0.003	0.967	EE_repressedEnhancer	L3_transcribedGeneBody	YA_transcribedGeneBody
chrI	1548944	1549202	peak448	2.545	2.96e-05	-1.002	0.507	EE_lowSignal	L3_transcribedGeneBody	YA_transcribedGeneBody
chrI	1549506	1549787	peak449	0.284	0.652	-0.332	0.852	EE_repressedEnhancer	L3_transcribedGeneBody	YA_transcribedGeneBody
chrI	1554809	1555164	peak450	1.136	0.0147	-1.343	0.23	EE_heterochromatin	L3_transcribedGeneBody	YA_transcribedGeneBody
chrI	1557369	1557838	peak451	1.419	0.00162	-1.824	0.0289	EE_heterochromatin	L3_lowSignal	YA_transcribedGeneBody
chrI	1559046	1559511	peak452	-1.021	0.00573	0.668	0.514	EE_promoterTSS	L3_promoterTSS	YA_activeEnhancer
chrI	1562543	1562878	peak453	-0.679	0.0683	0.448	0.694	EE_activeEnhancer	L3_activeEnhancer	YA_activeEnhancer
chrI	1565262	1565397	peak454	-0.625	0.0415	0.221	0.812	EE_transcribedGeneBody	L3_activeEnhancer	YA_transcribedGeneBody
chrI	1575541	1575844	peak455	-0.396	0.294	-0.122	0.899	EE_transcribedGeneBody	L3_transcribedGeneBody	YA_transcribedGeneBody
chrI	1583351	1583640	peak456	0.091	0.792	1.031	0.373	EE_repressedEnhancer	L3_repressedEnhancer	YA_repressedEnhancer
chrI	1585070	1585369	peak457	0.01	0.887	0.838	0.56	EE_repressedEnhancer	L3_transcribedGeneBody	YA_activeEnhancer
chrI	1590747	1590952	peak458	0.356	0.475	-0.072	0.973	EE_repressedEnhancer	L3_transcribedGeneBody	YA_activeEnhancer
chrI	1598446	1598830	peak459	-2.812	1.19e-13	0.963	0.376	EE_H3K27me3Repressed	L3_H3K27me3Repressed	YA_H3K27me3Repressed
chrI	1628526	1628917	peak460	-2.198	3.41e-09	0.02	0.998	EE_activeEnhancer	L3_promoterTSS	YA_activeEnhancer
chrI	1634406	1634754	peak461	-1.498	8.65e-05	1.566	0.127	EE_lowSignal	L3_lowSignal	YA_repressedEnhancer
chrI	1638510	1638692	peak462	0.518	0.231	0.4	0.872	EE_H3K27me3Repressed	L3_heterochromatin	YA_heterochromatin
chrI	1640452	1640706	peak463	0.956	0.0396	-1.662	0.0819	EE_H3K27me3Repressed	L3_heterochromatin	YA_heterochromatin
chrI	1651253	1651682	peak464	-0.305	0.481	0.635	0.533	EE_activeEnhancer	L3_transcribedGeneBody	YA_lowSignal
chrI	1651788	1651978	peak465	2.047	3.16e-05	-0.244	0.985	EE_activeEnhancer	L3_repressedEnhancer	YA_repressedEnhancer
chrI	1653131	1653449	peak466	-0.121	0.957	-0.266	0.874	EE_H3K27me3Repressed	L3_lowSignal	YA_heterochromatin
chrI	1660454	1661021	peak467	2.559	1.72e-08	-1.037	0.4	EE_repressedEnhancer	L3_H3K27me3Repressed	YA_H3K27me3Repressed
chrI	1668144	1668414	peak468	0.297	0.5	-0.563	0.657	EE_H3K27me3Repressed	L3_heterochromatin	YA_H3K27me3Repressed
chrI	1669043	1669392	peak469	0.642	0.319	-1.666	0.064	EE_H3K27me3Repressed	L3_heterochromatin	YA_H3K27me3Repressed
chrI	1672086	1672763	peak470	0.394	0.385	-1.081	0.228	EE_repressedEnhancer	L3_lowSignal	NA
chrI	1676520	1676871	peak471	-1.406	0.000187	0.822	0.387	EE_repressedEnhancer	L3_transcribedGeneBody	YA_repressedEnhancer
chrI	1682926	1683314	peak472	1.032	0.023	-1.65	0.088	EE_H3K27me3Repressed	L3_transcribedGeneBody	YA_H3K27me3Repressed
chrI	1686208	1686370	peak473	0.078	0.962	0.436	0.872	EE_repressedEnhancer	L3_lowSignal	YA_repressedEnhancer
chrI	1687597	1688139	peak474	-0.457	0.287	-0.051	0.97	EE_repressedEnhancer	L3_repressedEnhancer	YA_activeEnhancer
chrI	1691006	1691709	peak475	-1.142	0.00162	0.668	0.515	EE_activeEnhancer	L3_activeEnhancer	YA_activeEnhancer
chrI	1692776	1693345	peak476	0.542	0.355	0.561	0.676	EE_activeEnhancer	L3_activeEnhancer	YA_activeEnhancer
chrI	1695075	1695413	peak477	-0.286	0.524	0.813	0.418	EE_promoterTSS	L3_promoterTSS	YA_activeEnhancer
chrI	1698044	1698284	peak478	-1.265	0.00044	0.228	0.859	EE_promoterTSS	L3_promoterTSS	YA_activeEnhancer
chrI	1698272	1698841	peak479	-1.265	0.00044	0.228	0.859	EE_promoterTSS	L3_promoterTSS	YA_activeEnhancer
chrI	1699704	1700027	peak480	0.194	0.66	-0.228	0.893	EE_promoterTSS	L3_transcribedGeneBody	YA_promoterTSS
chrI	1717393	1717828	peak481	-0.2	0.623	0.718	0.559	EE_promoterTSS	L3_transcribedGeneBody	YA_lowSignal
chrI	1718936	1719437	peak482	-1.151	0.00178	0.852	0.376	EE_promoterTSS	L3_activeEnhancer	YA_lowSignal
chrI	1720594	1720974	peak483	-1.096	0.0055	1.434	0.167	EE_transcribedGeneBody	L3_transcribedGeneBody	YA_transcribedGeneBody
chrI	1722518	1722651	peak484	1.113	0.276	-0.769	0.888	EE_transcribedGeneBody	L3_transcribedGeneBody	YA_transcribedGeneBody
chrI	1726737	1727280	peak485	0.277	0.475	0.1	0.954	EE_transcribedGeneBody	L3_transcribedGeneBody	YA_transcribedGeneBody
chrI	1727674	1727956	peak486	1.806	0.000411	-1.399	0.234	EE_transcribedGeneBody	L3_transcribedGeneBody	YA_transcribedGeneBody
chrI	1728565	1728846	peak487	0.277	0.7	-0.452	0.854	EE_transcribedGeneBody	L3_transcribedGeneBody	YA_promoterTSS
chrI	1729564	1730134	peak488	-0.519	0.24	0.664	0.529	EE_transcribedGeneBody	L3_transcribedGeneBody	YA_transcribedGeneBody
chrI	1730876	1731330	peak489	0.437	0.322	-0.085	0.982	EE_transcribedGeneBody	L3_transcribedGeneBody	YA_transcribedGeneBody
chrI	1734686	1735429	peak490	-0.33	0.498	-0.142	0.916	EE_heterochromatin	L3_transcribedGeneBody	YA_transcribedGeneBody
chrI	1735655	1736045	peak491	-0.032	0.937	-0.75	0.512	EE_heterochromatin	L3_transcribedGeneBody	YA_transcribedGeneBody
chrI	1736194	1736530	peak492	-0.69	0.131	0.091	0.953	EE_heterochromatin	L3_transcribedGeneBody	YA_transcribedGeneBody
chrI	1736626	1737010	peak493	-0.704	0.114	1.064	0.384	EE_heterochromatin	L3_transcribedGeneBody	YA_transcribedGeneBody
chrI	1737297	1737979	peak494	-0.446	0.292	-0.331	0.81	EE_heterochromatin	L3_transcribedGeneBody	YA_transcribedGeneBody
chrI	1738064	1739237	peak495	-0.484	0.241	0.092	0.947	NA	L3_transcribedGeneBody	YA_transcribedGeneBody
chrI	1747620	1747827	peak496	3.211	2.2e-07	-2.915	0.00152	EE_transcribedGeneBody	L3_transcribedGeneBody	YA_transcribedGeneBody
chrI	1763079	1763312	peak497	2.908	1.01e-06	-1.314	0.37	EE_promoterTSS	L3_transcribedGeneBody	YA_transcribedGeneBody
chrI	1763556	1763726	peak498	2.961	8.11e-07	-1.487	0.47	EE_promoterTSS	L3_transcribedGeneBody	YA_transcribedGeneBody
chrI	1773401	1773675	peak499	1.509	0.0599	-0.546	0.83	EE_transcribedGeneBody	L3_transcribedGeneBody	YA_activeEnhancer
chrI	1775423	1775971	peak500	1.207	0.00712	-1.42	0.18	EE_transcribedGeneBody	L3_transcribedGeneBody	YA_transcribedGeneBody
chrI	1777234	1777669	peak501	-1.088	0.00318	0.937	0.321	EE_H3K27me3Repressed	L3_transcribedGeneBody	YA_transcribedGeneBody
chrI	1778674	1779027	peak502	-0.947	0.0121	0.749	0.507	EE_activeEnhancer	L3_transcribedGeneBody	YA_transcribedGeneBody
chrI	1779869	1780245	peak503	1.2	0.0145	-0.46	0.895	EE_activeEnhancer	L3_transcribedGeneBody	YA_activeEnhancer
chrI	1780890	1781833	peak504	0.16	0.76	-0.251	0.869	EE_transcribedGeneBody	L3_lowSignal	YA_transcribedGeneBody
chrI	1791740	1791994	peak505	2.314	0.000151	-1.025	0.516	EE_activeEnhancer	L3_lowSignal	YA_lowSignal
chrI	1797246	1797430	peak506	0.401	0.533	-1.33	0.234	EE_H3K27me3Repressed	L3_repressedEnhancer	YA_H3K27me3Repressed
chrI	1800013	1800444	peak507	0.179	0.685	-1.017	0.291	EE_H3K27me3Repressed	L3_heterochromatin	YA_H3K27me3Repressed
chrI	1800894	1801047	peak508	-0.199	0.845	0.608	0.68	EE_H3K27me3Repressed	L3_H3K27me3Repressed	YA_heterochromatin
chrI	1802583	1802782	peak509	1.227	0.0321	-1.045	0.5	EE_H3K27me3Repressed	L3_heterochromatin	YA_heterochromatin
chrI	1807851	1808232	peak510	-2.031	5.93e-08	1.447	0.124	EE_repressedEnhancer	L3_promoterTSS	YA_H3K27me3Repressed
chrI	1808600	1808861	peak511	2.748	1.84e-06	-1.341	0.307	EE_lowSignal	L3_promoterTSS	YA_H3K27me3Repressed
chrI	1809393	1810050	peak512	0.537	0.238	-0.912	0.376	EE_H3K27me3Repressed	L3_transcribedGeneBody	YA_H3K27me3Repressed
chrI	1811221	1811607	peak513	1.163	0.0167	-1.138	0.325	EE_H3K27me3Repressed	L3_transcribedGeneBody	YA_H3K27me3Repressed
chrI	1818724	1819287	peak514	1.195	0.00279	-1.023	0.208	EE_H3K27me3Repressed	L3_heterochromatin	YA_H3K27me3Repressed
chrI	1820489	1820720	peak515	3.548	3.1e-09	-2.033	0.081	EE_repressedEnhancer	L3_lowSignal	YA_H3K27me3Repressed
chrI	1822367	1822578	peak516	1.728	0.00495	-0.216	0.888	EE_repressedEnhancer	L3_lowSignal	YA_repressedEnhancer
chrI	1822758	1822985	peak517	1.452	0.0228	-1.061	0.455	EE_activeEnhancer	L3_repressedEnhancer	YA_repressedEnhancer
chrI	1823184	1823763	peak518	-0.293	0.508	-0.218	0.852	EE_promoterTSS	L3_promoterTSS	YA_activeEnhancer
chrI	1824216	1824499	peak519	2.963	1.69e-06	-2.984	0.001	EE_promoterTSS	L3_transcribedGeneBody	YA_promoterTSS
chrI	1825409	1825585	peak520	1.381	0.0898	-0.894	0.594	EE_transcribedGeneBody	L3_transcribedGeneBody	YA_transcribedGeneBody
chrI	1835400	1835957	peak521	-2.117	3.19e-09	0.266	0.83	EE_promoterTSS	L3_promoterTSS	YA_promoterTSS
chrI	1835762	1835977	peak522	-2.117	3.19e-09	0.266	0.83	EE_promoterTSS	L3_promoterTSS	YA_promoterTSS
chrI	1836225	1837370	peak523	-2.544	1.22e-12	0.514	0.621	EE_promoterTSS	L3_promoterTSS	YA_activeEnhancer
chrI	1843214	1843838	peak524	0.332	0.462	-0.669	0.552	EE_transcribedGeneBody	L3_lowSignal	YA_activeEnhancer
chrI	1844232	1844369	peak525	2.328	0.000336	-1.755	0.189	EE_lowSignal	L3_lowSignal	YA_repressedEnhancer
chrI	1844936	1845228	peak526	1.541	0.00277	0.081	0.993	EE_repressedEnhancer	L3_repressedEnhancer	YA_repressedEnhancer
chrI	1852207	1853572	peak527	0.713	0.0579	-0.665	0.507	NA	L3_lowSignal	YA_heterochromatin
chrI	1861114	1861274	peak528	2.485	3.71e-05	-1.194	0.837	EE_repressedEnhancer	L3_lowSignal	YA_lowSignal
chrI	1861675	1862120	peak529	1.032	0.0123	-0.021	0.998	EE_activeEnhancer	L3_repressedEnhancer	YA_repressedEnhancer
chrI	1862192	1862391	peak530	1.472	0.00719	0.056	0.992	EE_activeEnhancer	L3_repressedEnhancer	YA_lowSignal
chrI	1873612	1874441	peak531	-1.666	2.84e-06	0.041	0.979	EE_promoterTSS	L3_promoterTSS	YA_promoterTSS
chrI	1874443	1875125	peak532	0.165	0.706	-0.351	0.773	EE_transcribedGeneBody	L3_transcribedGeneBody	YA_promoterTSS
chrI	1876491	1876700	peak533	0.418	0.274	-0.271	0.855	EE_transcribedGeneBody	L3_transcribedGeneBody	YA_transcribedGeneBody
chrI	1879412	1880011	peak534	0.414	0.298	-0.234	0.852	EE_transcribedGeneBody	L3_transcribedGeneBody	YA_promoterTSS
chrI	1881725	1882161	peak535	0.826	0.0624	-0.315	0.813	EE_transcribedGeneBody	L3_transcribedGeneBody	YA_transcribedGeneBody
chrI	1883712	1884071	peak536	0.062	0.987	0.158	0.946	EE_lowSignal	L3_transcribedGeneBody	YA_transcribedGeneBody
chrI	1884196	1884497	peak537	-0.144	0.888	-0.46	0.731	EE_lowSignal	L3_transcribedGeneBody	YA_repressedEnhancer
chrI	1892000	1892891	peak538	1.714	8e-05	-1.546	0.0754	EE_H3K27me3Repressed	L3_lowSignal	YA_H3K27me3Repressed
chrI	1893102	1893333	peak539	0.548	0.0741	-0.488	0.604	EE_H3K27me3Repressed	L3_H3K27me3Repressed	YA_H3K27me3Repressed
chrI	1913448	1913843	peak540	0.632	0.471	-1.469	0.238	EE_heterochromatin	L3_H3K27me3Repressed	YA_transcribedGeneBody
chrI	1913926	1914523	peak541	-0.973	0.00946	-0.537	0.59	EE_heterochromatin	L3_heterochromatin	YA_transcribedGeneBody
chrI	1914817	1914994	peak542	0.825	0.053	-0.411	0.62	EE_heterochromatin	L3_heterochromatin	YA_transcribedGeneBody
chrI	1915682	1916157	peak543	0.457	0.668	-0.585	0.58	EE_heterochromatin	L3_heterochromatin	YA_transcribedGeneBody
chrI	1917908	1918155	peak544	-0.26	0.514	-0.058	0.984	EE_transcribedGeneBody	L3_transcribedGeneBody	YA_transcribedGeneBody
chrI	1934576	1934746	peak545	0.873	0.0554	-1.102	0.311	EE_transcribedGeneBody	L3_transcribedGeneBody	YA_transcribedGeneBody
chrI	1958469	1958666	peak546	-1.237	0.00212	-0.724	0.539	EE_promoterTSS	L3_promoterTSS	YA_promoterTSS
chrI	1972620	1972869	peak547	2.47	7.07e-07	-1.815	0.0703	EE_transcribedGeneBody	L3_transcribedGeneBody	YA_promoterTSS
chrI	1973738	1973957	peak548	0.7	0.258	-0.1	0.899	EE_lowSignal	L3_transcribedGeneBody	YA_transcribedGeneBody
chrI	1974397	1974760	peak549	-0.308	0.608	-0.664	0.485	EE_lowSignal	L3_lowSignal	YA_transcribedGeneBody
chrI	1978568	1978723	peak550	1.363	0.0896	-0.453	0.861	EE_promoterTSS	L3_activeEnhancer	YA_promoterTSS
chrI	2007296	2007522	peak551	3.913	1.2e-10	-2.905	0.00173	EE_transcribedGeneBody	L3_transcribedGeneBody	YA_transcribedGeneBody
chrI	2011126	2011761	peak552	-0.963	0.00851	0.089	0.95	EE_activeEnhancer	L3_activeEnhancer	YA_activeEnhancer
chrI	2019480	2019877	peak553	-0.788	0.0362	0.003	0.954	EE_lowSignal	L3_activeEnhancer	YA_activeEnhancer
chrI	2019877	2020273	peak554	-0.788	0.0362	0.003	0.954	EE_H3K27me3Repressed	L3_activeEnhancer	YA_activeEnhancer
chrI	2021187	2021551	peak555	-7.895	5.94e-42	-0.523	0.651	EE_H3K27me3Repressed	L3_activeEnhancer	YA_activeEnhancer
chrI	2024624	2024904	peak556	-1.522	3.9e-05	0.053	0.957	EE_activeEnhancer	L3_activeEnhancer	YA_activeEnhancer
chrI	2026033	2026286	peak557	-1.108	0.00377	0.95	0.399	EE_H3K27me3Repressed	L3_transcribedGeneBody	YA_activeEnhancer
chrI	2031830	2032000	peak558	0.141	0.763	-0.04	0.982	EE_H3K27me3Repressed	L3_transcribedGeneBody	YA_transcribedGeneBody
chrI	2033167	2033410	peak559	0.546	0.191	-0.527	0.617	EE_lowSignal	L3_transcribedGeneBody	YA_transcribedGeneBody
chrI	2034469	2034688	peak560	1.856	0.00523	-1.106	0.44	EE_lowSignal	L3_transcribedGeneBody	YA_transcribedGeneBody
chrI	2040990	2042552	peak561	-0.1	0.87	-0.836	0.368	EE_heterochromatin	L3_transcribedGeneBody	YA_transcribedGeneBody
chrI	2044988	2045214	peak562	-1.474	0.000191	0.672	0.577	EE_repressedEnhancer	L3_transcribedGeneBody	YA_activeEnhancer
chrI	2049166	2049396	peak563	1.91	0.00209	-1.339	0.309	EE_H3K27me3Repressed	L3_heterochromatin	YA_transcribedGeneBody
chrI	2055953	2056163	peak564	1.143	0.0329	-1.309	0.305	EE_heterochromatin	L3_heterochromatin	YA_transcribedGeneBody
chrI	2058158	2058622	peak565	0.589	0.186	-0.849	0.425	EE_heterochromatin	L3_heterochromatin	YA_transcribedGeneBody
chrI	2063550	2063719	peak566	0.222	0.823	-0.496	0.766	EE_promoterTSS	L3_promoterTSS	YA_promoterTSS
chrI	2064730	2065008	peak567	0.408	0.493	-0.276	0.808	EE_promoterTSS	L3_activeEnhancer	YA_promoterTSS
chrI	2065501	2065714	peak568	-0.562	0.263	-0.902	0.418	EE_promoterTSS	L3_transcribedGeneBody	YA_promoterTSS
chrI	2067436	2067675	peak569	1.847	0.00033	-2.167	0.0153	EE_lowSignal	L3_lowSignal	YA_lowSignal
chrI	2068570	2070674	peak570	-0.44	0.28	-1.189	0.155	EE_transcribedGeneBody	L3_promoterTSS	YA_transcribedGeneBody
chrI	2070777	2071016	peak571	-0.994	0.00702	0.148	0.938	EE_promoterTSS	L3_promoterTSS	YA_promoterTSS
chrI	2073436	2073750	peak572	2.422	6.35e-05	-1.969	0.0611	EE_transcribedGeneBody	L3_transcribedGeneBody	YA_transcribedGeneBody
chrI	2076884	2077196	peak573	0.588	0.431	-0.761	0.443	EE_activeEnhancer	L3_activeEnhancer	YA_activeEnhancer
chrI	2084751	2085451	peak574	-1.433	7.48e-05	-0.73	0.453	EE_activeEnhancer	NA	YA_activeEnhancer
chrI	2086908	2087318	peak575	3.349	2.28e-09	-1.729	0.151	EE_repressedEnhancer	L3_lowSignal	YA_repressedEnhancer
chrI	2087701	2087916	peak576	0.563	0.127	-0.545	0.592	EE_lowSignal	L3_lowSignal	YA_H3K27me3Repressed
chrI	2088852	2089141	peak577	0.84	0.0522	-0.104	0.929	EE_repressedEnhancer	L3_repressedEnhancer	YA_H3K27me3Repressed
chrI	2095131	2095437	peak578	1.752	8.29e-05	-0.187	0.808	EE_repressedEnhancer	L3_H3K27me3Repressed	YA_H3K27me3Repressed
chrI	2097469	2097774	peak579	1.962	0.00388	-2.733	0.00538	EE_promoterTSS	L3_transcribedGeneBody	YA_promoterTSS
chrI	2102397	2102503	peak580	-0.149	0.978	0.785	0.731	EE_transcribedGeneBody	L3_transcribedGeneBody	YA_transcribedGeneBody
chrI	2117169	2117481	peak581	1.345	0.00287	-0.803	0.351	EE_transcribedGeneBody	L3_transcribedGeneBody	YA_transcribedGeneBody
chrI	2118216	2118429	peak582	-0.318	0.624	-1.102	0.359	EE_transcribedGeneBody	L3_transcribedGeneBody	YA_transcribedGeneBody
chrI	2126744	2127049	peak583	-2.021	6.02e-08	0.853	0.44	EE_activeEnhancer	L3_activeEnhancer	YA_activeEnhancer
chrI	2139146	2139227	peak584	0.435	0.425	-0.665	0.661	EE_transcribedGeneBody	L3_transcribedGeneBody	YA_transcribedGeneBody
chrI	2150829	2150981	peak585	3.26	1.18e-07	-0.216	0.888	EE_transcribedGeneBody	L3_transcribedGeneBody	YA_H3K27me3Repressed
chrI	2151684	2151992	peak586	2.523	2.35e-07	1.024	0.31	EE_promoterTSS	L3_repressedEnhancer	YA_H3K27me3Repressed
chrI	2154994	2155266	peak587	1.973	0.00118	-0.327	0.936	EE_activeEnhancer	L3_repressedEnhancer	YA_repressedEnhancer
chrI	2155365	2156271	peak588	-0.315	0.457	0.39	0.726	EE_promoterTSS	L3_activeEnhancer	YA_activeEnhancer
chrI	2176827	2177338	peak589	0.625	0.151	1.129	0.342	EE_transcribedGeneBody	L3_transcribedGeneBody	YA_transcribedGeneBody
chrI	2177425	2178389	peak590	0.52	0.187	0.593	0.575	EE_activeEnhancer	L3_transcribedGeneBody	YA_transcribedGeneBody
chrI	2179767	2180255	peak591	-0.071	0.768	0.716	0.537	EE_activeEnhancer	L3_transcribedGeneBody	YA_transcribedGeneBody
chrI	2182780	2183237	peak592	-0.913	0.0184	1.344	0.187	EE_transcribedGeneBody	L3_transcribedGeneBody	YA_transcribedGeneBody
chrI	2184235	2184410	peak593	0.593	0.369	-0.645	0.893	EE_transcribedGeneBody	L3_transcribedGeneBody	YA_transcribedGeneBody
chrI	2184883	2185123	peak594	-1.515	8.8e-05	1.593	0.118	EE_transcribedGeneBody	L3_transcribedGeneBody	YA_transcribedGeneBody
chrI	2189404	2189631	peak595	0.676	0.278	0.711	0.689	EE_activeEnhancer	L3_transcribedGeneBody	YA_transcribedGeneBody
chrI	2190382	2190756	peak596	-1.109	0.00406	0.386	0.844	NA	L3_transcribedGeneBody	YA_transcribedGeneBody
chrI	2191339	2191528	peak597	-0.919	0.00159	0.323	0.776	EE_transcribedGeneBody	L3_activeEnhancer	YA_transcribedGeneBody
chrI	2195771	2196607	peak598	-0.253	0.629	-0.35	0.748	EE_transcribedGeneBody	L3_transcribedGeneBody	YA_transcribedGeneBody
chrI	2199325	2199752	peak599	0.24	0.573	-0.299	0.841	EE_transcribedGeneBody	L3_transcribedGeneBody	YA_transcribedGeneBody
chrI	2204807	2205203	peak600	1.142	0.00797	-1.133	0.312	EE_transcribedGeneBody	L3_transcribedGeneBody	YA_promoterTSS
chrI	2211799	2212012	peak601	-1.506	0.000315	1.288	0.195	EE_lowSignal	L3_lowSignal	YA_lowSignal
chrI	2215860	2216064	peak602	0.068	0.679	-0.559	0.588	EE_lowSignal	L3_lowSignal	NA
chrI	2218946	2219306	peak603	1.737	5e-05	-0.506	0.562	EE_repressedEnhancer	L3_H3K27me3Repressed	YA_H3K27me3Repressed
chrI	2219560	2219806	peak604	1.339	0.00366	-1.353	0.203	EE_H3K27me3Repressed	L3_H3K27me3Repressed	YA_heterochromatin
chrI	2220554	2221033	peak605	0.761	0.0448	-0.817	0.462	EE_repressedEnhancer	L3_H3K27me3Repressed	YA_H3K27me3Repressed
chrI	2223060	2223337	peak606	1.201	0.00103	-0.776	0.304	EE_lowSignal	L3_H3K27me3Repressed	YA_heterochromatin
chrI	2223885	2224221	peak607	0.483	0.183	-1.025	0.278	EE_lowSignal	L3_H3K27me3Repressed	YA_heterochromatin
chrI	2225803	2226244	peak608	-0.047	0.971	-0.288	0.829	EE_H3K27me3Repressed	L3_lowSignal	YA_heterochromatin
chrI	2227670	2227886	peak609	1.221	0.0168	-0.724	0.692	EE_lowSignal	L3_lowSignal	YA_heterochromatin
chrI	2234407	2234666	peak610	0.477	0.341	-0.226	0.89	EE_H3K27me3Repressed	L3_H3K27me3Repressed	YA_heterochromatin
chrI	2235074	2235487	peak611	0.435	0.386	-0.459	0.708	EE_H3K27me3Repressed	L3_lowSignal	YA_heterochromatin
chrI	2235933	2236495	peak612	-0.224	0.625	-0.109	0.939	EE_H3K27me3Repressed	L3_lowSignal	YA_heterochromatin
chrI	2236490	2237286	peak613	-0.224	0.625	-0.109	0.939	EE_H3K27me3Repressed	L3_lowSignal	YA_heterochromatin
chrI	2238192	2238427	peak614	0.219	0.79	-0.739	0.511	EE_H3K27me3Repressed	L3_H3K27me3Repressed	YA_heterochromatin
chrI	2246529	2247143	peak615	0.709	0.0659	-1.273	0.159	EE_lowSignal	L3_lowSignal	YA_heterochromatin
chrI	2247325	2247875	peak616	-0.322	0.502	-0.345	0.797	EE_lowSignal	L3_lowSignal	YA_H3K27me3Repressed
chrI	2253382	2253850	peak617	0.188	0.588	-1.13	0.232	EE_H3K27me3Repressed	L3_heterochromatin	YA_H3K27me3Repressed
chrI	2259438	2259598	peak618	1.519	0.00775	-1.199	0.467	EE_lowSignal	L3_transcribedGeneBody	YA_H3K27me3Repressed
chrI	2261590	2261781	peak619	1.549	0.00383	-0.876	0.723	EE_lowSignal	L3_transcribedGeneBody	YA_heterochromatin
chrI	2269179	2269321	peak620	0.475	0.133	-0.729	0.568	EE_H3K27me3Repressed	L3_transcribedGeneBody	YA_H3K27me3Repressed
chrI	2269558	2269693	peak621	0.958	0.00835	-0.041	0.694	EE_lowSignal	L3_lowSignal	YA_heterochromatin
chrI	2270105	2270624	peak622	0.339	0.346	-0.525	0.652	EE_H3K27me3Repressed	L3_lowSignal	YA_H3K27me3Repressed
chrI	2273033	2273466	peak623	0.005	0.921	-0.272	0.837	EE_repressedEnhancer	NA	YA_H3K27me3Repressed
chrI	2273592	2273805	peak624	0.922	0.0976	-0.715	0.535	EE_lowSignal	L3_lowSignal	YA_repressedEnhancer
chrI	2276489	2276714	peak625	0.72	0.0832	-0.306	0.852	EE_lowSignal	L3_transcribedGeneBody	YA_lowSignal
chrI	2277026	2277276	peak626	-0.119	0.588	0.529	0.693	EE_activeEnhancer	L3_repressedEnhancer	YA_lowSignal
chrI	2278368	2278651	peak627	4.717	2.53e-15	-1.624	0.141	EE_activeEnhancer	L3_lowSignal	YA_lowSignal
chrI	2280378	2280873	peak628	0.844	0.0788	0.256	0.94	EE_promoterTSS	L3_repressedEnhancer	YA_promoterTSS
chrI	2291033	2291394	peak629	-1.347	0.000227	0.204	0.887	EE_promoterTSS	L3_activeEnhancer	YA_activeEnhancer
chrI	2291499	2291664	peak630	-0.21	0.425	-0.332	0.802	EE_promoterTSS	L3_activeEnhancer	YA_activeEnhancer
chrI	2292619	2294149	peak631	-0.873	0.0182	0.227	0.859	EE_promoterTSS	NA	YA_promoterTSS
chrI	2294436	2294625	peak632	-0.207	0.787	-0.202	0.875	EE_transcribedGeneBody	L3_transcribedGeneBody	YA_promoterTSS
chrI	2299340	2300139	peak633	0.553	0.157	0.29	0.815	EE_promoterTSS	L3_activeEnhancer	YA_activeEnhancer
chrI	2299917	2300137	peak634	0.553	0.157	0.29	0.815	EE_promoterTSS	L3_activeEnhancer	YA_transcribedGeneBody
chrI	2301661	2301846	peak635	1.144	0.00463	-0.547	0.557	EE_promoterTSS	L3_transcribedGeneBody	YA_transcribedGeneBody
chrI	2302852	2303061	peak636	0.402	0.351	0.122	0.964	EE_promoterTSS	L3_transcribedGeneBody	YA_promoterTSS
chrI	2305723	2305936	peak637	-0.2	0.699	-0.367	0.725	EE_transcribedGeneBody	L3_transcribedGeneBody	YA_promoterTSS
chrI	2306070	2307056	peak638	-0.115	0.832	-0.127	0.918	EE_promoterTSS	L3_promoterTSS	YA_promoterTSS
chrI	2307991	2308201	peak639	0.283	0.597	-1.212	0.209	EE_transcribedGeneBody	L3_transcribedGeneBody	YA_promoterTSS
chrI	2311035	2311233	peak640	0.451	0.562	-0.858	0.489	EE_transcribedGeneBody	L3_transcribedGeneBody	YA_transcribedGeneBody
chrI	2311799	2312035	peak641	1.737	0.00414	-1.736	0.13	EE_activeEnhancer	L3_activeEnhancer	YA_promoterTSS
chrI	2313048	2313230	peak642	-1.048	0.00557	-0.073	0.975	EE_promoterTSS	L3_promoterTSS	YA_promoterTSS
chrI	2313539	2313993	peak643	2.054	5.1e-06	-1.851	0.0274	EE_promoterTSS	L3_transcribedGeneBody	YA_promoterTSS
chrI	2315997	2316227	peak644	-0.612	0.163	-1.397	0.108	EE_transcribedGeneBody	L3_transcribedGeneBody	YA_transcribedGeneBody
chrI	2316694	2316904	peak645	0.563	0.448	-1.713	0.0791	EE_transcribedGeneBody	L3_transcribedGeneBody	YA_transcribedGeneBody
chrI	2317596	2317754	peak646	-0.319	0.626	-0.832	0.383	EE_transcribedGeneBody	L3_transcribedGeneBody	YA_promoterTSS
chrI	2318374	2318667	peak647	-0.018	0.974	-1.626	0.0464	EE_transcribedGeneBody	L3_transcribedGeneBody	YA_transcribedGeneBody
chrI	2319595	2320652	peak648	-0.263	0.588	-0.943	0.3	EE_transcribedGeneBody	L3_transcribedGeneBody	YA_transcribedGeneBody
chrI	2321880	2322042	peak649	-0.714	0.0229	-0.525	0.699	EE_promoterTSS	L3_transcribedGeneBody	YA_activeEnhancer
chrI	2325961	2326694	peak650	1.06	0.0161	-1.132	0.245	EE_heterochromatin	L3_heterochromatin	YA_heterochromatin
chrI	2328683	2328881	peak651	0.98	0.00548	-0.981	0.297	EE_lowSignal	L3_H3K27me3Repressed	YA_heterochromatin
chrI	2329408	2329825	peak652	0.32	0.294	-1.052	0.242	EE_H3K27me3Repressed	L3_H3K27me3Repressed	YA_heterochromatin
chrI	2333093	2333347	peak653	0.704	0.606	0.058	0.938	EE_activeEnhancer	L3_lowSignal	YA_lowSignal
chrI	2342300	2342445	peak654	2.572	4.89e-05	-0.711	0.773	EE_promoterTSS	L3_repressedEnhancer	YA_H3K27me3Repressed
chrI	2377291	2377544	peak655	0.338	0.214	-1.289	0.149	EE_transcribedGeneBody	L3_transcribedGeneBody	YA_transcribedGeneBody
chrI	2384732	2384860	peak656	1.332	0.13	-0.364	0.965	EE_transcribedGeneBody	L3_transcribedGeneBody	YA_transcribedGeneBody
chrI	2388225	2388465	peak657	0.301	0.508	-0.516	0.647	EE_transcribedGeneBody	L3_transcribedGeneBody	YA_transcribedGeneBody
chrI	2393327	2393741	peak658	-1.841	3.92e-07	0.185	0.888	EE_promoterTSS	NA	YA_promoterTSS
chrI	2401560	2401765	peak659	-0.551	0.205	-0.168	0.886	EE_promoterTSS	L3_promoterTSS	YA_promoterTSS
chrI	2404742	2405048	peak660	0.273	0.573	-1.259	0.188	EE_promoterTSS	L3_transcribedGeneBody	YA_promoterTSS
chrI	2409341	2409894	peak661	1.58	0.00579	-2.6	0.00153	EE_transcribedGeneBody	L3_promoterTSS	YA_transcribedGeneBody
chrI	2410031	2410315	peak662	-1.128	0.00446	-0.739	0.476	EE_repressedEnhancer	L3_repressedEnhancer	YA_repressedEnhancer
chrI	2411733	2412099	peak663	4.065	1.67e-11	-5.505	1.31e-11	EE_lowSignal	L3_lowSignal	YA_lowSignal
chrI	2413023	2413281	peak664	3.402	2.88e-08	-3.438	9.5e-05	EE_lowSignal	L3_repressedEnhancer	YA_H3K27me3Repressed
chrI	2413556	2413726	peak665	-0.272	0.302	0.737	0.546	EE_lowSignal	L3_repressedEnhancer	YA_H3K27me3Repressed
chrI	2417298	2417552	peak666	0.934	0.0537	-0.189	0.823	EE_activeEnhancer	L3_repressedEnhancer	YA_H3K27me3Repressed
chrI	2419567	2420068	peak667	0.13	0.883	-0.864	0.379	EE_transcribedGeneBody	L3_transcribedGeneBody	YA_promoterTSS
chrI	2420586	2421400	peak668	-0.518	0.171	-0.274	0.82	EE_promoterTSS	L3_promoterTSS	YA_promoterTSS
chrI	2421747	2421934	peak669	-0.601	0.0755	-0.618	0.673	EE_promoterTSS	L3_promoterTSS	YA_promoterTSS
chrI	2422840	2423082	peak670	0.377	0.475	-0.579	0.625	EE_lowSignal	L3_lowSignal	YA_H3K27me3Repressed
chrI	2424906	2425116	peak671	0.634	0.293	-1.079	0.388	EE_lowSignal	L3_lowSignal	YA_H3K27me3Repressed
chrI	2428005	2428255	peak672	0.642	0.174	-0.891	0.488	EE_H3K27me3Repressed	L3_heterochromatin	YA_H3K27me3Repressed
chrI	2428822	2429006	peak673	-0.299	0.529	0.131	0.992	EE_heterochromatin	L3_heterochromatin	YA_H3K27me3Repressed
chrI	2429911	2430106	peak674	1.551	0.00257	-1.494	0.207	EE_H3K27me3Repressed	L3_lowSignal	YA_H3K27me3Repressed
chrI	2431329	2431922	peak675	0.684	0.16	-0.645	0.55	EE_repressedEnhancer	L3_lowSignal	NA
chrI	2433671	2434266	peak676	-0.031	0.753	-0.859	0.455	EE_promoterTSS	L3_promoterTSS	YA_promoterTSS
chrI	2436630	2437250	peak677	0.685	0.156	-0.131	0.952	EE_activeEnhancer	L3_transcribedGeneBody	YA_lowSignal
chrI	2437394	2437817	peak678	0.215	0.694	0.387	0.732	EE_activeEnhancer	L3_transcribedGeneBody	YA_repressedEnhancer
chrI	2456215	2456430	peak679	0.866	0.0512	-0.982	0.617	EE_H3K27me3Repressed	L3_H3K27me3Repressed	YA_H3K27me3Repressed
chrI	2460860	2461118	peak680	1.167	0.0495	0.459	0.737	EE_activeEnhancer	L3_lowSignal	YA_H3K27me3Repressed
chrI	2462649	2462817	peak681	1.698	0.000221	-0.789	0.365	EE_lowSignal	L3_H3K27me3Repressed	YA_H3K27me3Repressed
chrI	2462948	2463858	peak682	1.338	0.000603	-1.064	0.285	EE_repressedEnhancer	L3_lowSignal	YA_H3K27me3Repressed
chrI	2482788	2483105	peak683	-0.215	0.751	-0.578	0.577	EE_transcribedGeneBody	L3_transcribedGeneBody	YA_transcribedGeneBody
chrI	2483162	2483436	peak684	0.948	0.157	-1.378	0.212	EE_transcribedGeneBody	L3_transcribedGeneBody	YA_transcribedGeneBody
chrI	2485541	2485753	peak685	-0.339	0.446	-0.198	0.825	EE_promoterTSS	L3_promoterTSS	YA_promoterTSS
chrI	2490276	2490545	peak686	-0.032	0.937	-1.026	0.357	EE_transcribedGeneBody	L3_transcribedGeneBody	YA_promoterTSS
chrI	2513789	2513980	peak687	2.037	0.000327	-0.306	0.858	EE_activeEnhancer	L3_lowSignal	YA_repressedEnhancer
chrI	2514011	2514525	peak688	-0.853	0.0263	-0.814	0.391	NA	L3_repressedEnhancer	YA_repressedEnhancer
chrI	2518782	2518989	peak689	0.527	0.294	0.113	0.956	EE_repressedEnhancer	L3_H3K27me3Repressed	YA_H3K27me3Repressed
chrI	2525806	2526304	peak690	0.191	0.618	0.021	0.977	EE_lowSignal	L3_lowSignal	YA_heterochromatin
chrI	2532438	2532862	peak691	-0.039	0.923	-0.143	0.931	EE_H3K27me3Repressed	L3_H3K27me3Repressed	YA_H3K27me3Repressed
chrI	2552816	2553135	peak692	0.751	0.0556	0.673	0.692	EE_repressedEnhancer	L3_H3K27me3Repressed	YA_H3K27me3Repressed
chrI	2565105	2565492	peak693	2.65	1.36e-08	0.083	0.965	EE_activeEnhancer	L3_H3K27me3Repressed	YA_heterochromatin
chrI	2566577	2567072	peak694	1.949	2.75e-05	-0.749	0.685	EE_repressedEnhancer	L3_lowSignal	YA_H3K27me3Repressed
chrI	2567299	2567466	peak695	1.301	0.0107	0.026	0.937	EE_repressedEnhancer	L3_H3K27me3Repressed	YA_heterochromatin
chrI	2567969	2568123	peak696	2.492	0.000118	-0.684	0.774	EE_repressedEnhancer	L3_H3K27me3Repressed	YA_heterochromatin
chrI	2571277	2571628	peak697	-0.552	0.25	-0.3	0.815	EE_lowSignal	L3_H3K27me3Repressed	YA_H3K27me3Repressed
chrI	2572638	2572939	peak698	0.275	0.727	-0.003	0.995	EE_H3K27me3Repressed	L3_transcribedGeneBody	YA_heterochromatin
chrI	2573973	2574267	peak699	-0.263	0.721	-0.31	0.796	EE_H3K27me3Repressed	L3_transcribedGeneBody	YA_H3K27me3Repressed
chrI	2577371	2577664	peak700	-1.562	4.51e-05	1.026	0.354	EE_repressedEnhancer	L3_activeEnhancer	YA_H3K27me3Repressed
chrI	2580022	2580418	peak701	-2.686	8.21e-13	1.028	0.298	EE_lowSignal	L3_activeEnhancer	YA_repressedEnhancer
chrI	2586206	2586496	peak702	-1.333	0.000173	0.395	0.77	EE_activeEnhancer	L3_promoterTSS	YA_activeEnhancer
chrI	2587318	2587792	peak703	-1.699	1.99e-06	-0.413	0.734	EE_activeEnhancer	L3_promoterTSS	YA_activeEnhancer
chrI	2589130	2589295	peak704	-0.893	0.0357	0.408	0.626	EE_H3K27me3Repressed	L3_lowSignal	YA_lowSignal
chrI	2589578	2590300	peak705	-0.057	0.904	-0.482	0.683	EE_H3K27me3Repressed	L3_lowSignal	YA_heterochromatin
chrI	2591496	2591787	peak706	-1.18	0.002	0.772	0.398	EE_repressedEnhancer	L3_activeEnhancer	YA_activeEnhancer
chrI	2592115	2592827	peak707	-0.019	0.957	0.006	0.998	EE_repressedEnhancer	L3_lowSignal	YA_heterochromatin
chrI	2594498	2595073	peak708	0.224	0.644	0.247	0.887	EE_lowSignal	L3_lowSignal	YA_heterochromatin
chrI	2595430	2595632	peak709	-0.386	0.426	-0.174	0.946	EE_lowSignal	L3_lowSignal	YA_heterochromatin
chrI	2598453	2598814	peak710	-1.463	7.67e-05	0.097	0.965	EE_repressedEnhancer	L3_activeEnhancer	YA_H3K27me3Repressed
chrI	2602308	2602490	peak711	0.889	0.147	-0.418	0.836	EE_H3K27me3Repressed	L3_lowSignal	YA_heterochromatin
chrI	2603491	2604521	peak712	-1.133	0.00181	0.37	0.742	EE_activeEnhancer	L3_activeEnhancer	YA_activeEnhancer
chrI	2605172	2605708	peak713	-2.303	2.26e-10	0.786	0.419	EE_repressedEnhancer	L3_activeEnhancer	YA_activeEnhancer
chrI	2611603	2612311	peak714	0.764	0.0541	-0.713	0.511	EE_lowSignal	L3_transcribedGeneBody	YA_transcribedGeneBody
chrI	2612918	2613113	peak715	0.686	0.309	-0.511	0.846	EE_H3K27me3Repressed	L3_transcribedGeneBody	YA_H3K27me3Repressed
chrI	2614117	2614363	peak716	1.896	0.00054	-1.799	0.119	EE_H3K27me3Repressed	L3_transcribedGeneBody	YA_transcribedGeneBody
chrI	2616336	2616540	peak717	0.785	0.0909	-1.624	0.109	EE_H3K27me3Repressed	L3_transcribedGeneBody	YA_repressedEnhancer
chrI	2617017	2617112	peak718	0.693	0.32	-0.583	0.629	EE_H3K27me3Repressed	L3_lowSignal	YA_heterochromatin
chrI	2617574	2617876	peak719	1.327	0.00505	-0.86	0.355	EE_repressedEnhancer	L3_H3K27me3Repressed	YA_H3K27me3Repressed
chrI	2618622	2619062	peak720	1.754	0.000111	-1.526	0.0713	EE_repressedEnhancer	L3_lowSignal	YA_H3K27me3Repressed
chrI	2621358	2621530	peak721	0.633	0.225	-0.701	0.42	EE_transcribedGeneBody	L3_transcribedGeneBody	YA_promoterTSS
chrI	2622341	2622709	peak722	0.088	0.872	-0.774	0.467	EE_transcribedGeneBody	L3_transcribedGeneBody	YA_promoterTSS
chrI	2622937	2623140	peak723	1.695	0.00751	-1.921	0.107	EE_transcribedGeneBody	L3_transcribedGeneBody	YA_promoterTSS
chrI	2625347	2625846	peak724	0.636	0.14	-0.899	0.376	EE_transcribedGeneBody	L3_transcribedGeneBody	YA_transcribedGeneBody
chrI	2632265	2632432	peak725	0.173	0.858	-0.261	0.803	EE_heterochromatin	L3_heterochromatin	YA_transcribedGeneBody
chrI	2639641	2639981	peak726	-1.555	2.54e-05	0.046	0.983	EE_promoterTSS	L3_activeEnhancer	YA_promoterTSS
chrI	2643506	2643762	peak727	1.478	0.00157	-1.093	0.195	EE_transcribedGeneBody	L3_transcribedGeneBody	YA_transcribedGeneBody
chrI	2646474	2646624	peak728	-0.148	0.983	-0.424	0.755	EE_H3K27me3Repressed	L3_H3K27me3Repressed	YA_heterochromatin
chrI	2646820	2647093	peak729	0.423	0.241	-0.88	0.407	EE_H3K27me3Repressed	L3_lowSignal	YA_heterochromatin
chrI	2647443	2647605	peak730	2.454	0.000178	-1.484	0.305	EE_lowSignal	L3_heterochromatin	YA_heterochromatin
chrI	2648832	2649137	peak731	0.122	0.696	-0.08	1	EE_repressedEnhancer	L3_lowSignal	YA_H3K27me3Repressed
chrI	2649789	2650124	peak732	0.532	0.327	0.293	0.856	EE_H3K27me3Repressed	L3_lowSignal	YA_repressedEnhancer
chrI	2654422	2654772	peak733	-0.423	0.397	0.881	0.45	EE_repressedEnhancer	L3_lowSignal	YA_H3K27me3Repressed
chrI	2655778	2655970	peak734	-0.318	0.502	0.564	0.799	EE_H3K27me3Repressed	L3_activeEnhancer	YA_activeEnhancer
chrI	2657702	2657906	peak735	0.885	0.131	0.273	0.844	EE_lowSignal	L3_lowSignal	YA_activeEnhancer
chrI	2659863	2660049	peak736	-1.213	0.0025	0.469	0.712	EE_lowSignal	L3_activeEnhancer	YA_activeEnhancer
chrI	2663226	2663315	peak737	-0.356	0.545	-0.313	0.852	EE_H3K27me3Repressed	L3_activeEnhancer	YA_repressedEnhancer
chrI	2665308	2665587	peak738	-0.29	0.53	0.252	0.801	EE_repressedEnhancer	L3_transcribedGeneBody	YA_activeEnhancer
chrI	2665687	2666143	peak739	-1.315	0.000408	0.98	0.302	EE_lowSignal	L3_transcribedGeneBody	YA_repressedEnhancer
chrI	2667632	2668361	peak740	-1.765	9.34e-07	0.138	0.924	EE_H3K27me3Repressed	L3_activeEnhancer	YA_activeEnhancer
chrI	2668807	2668971	peak741	-1.232	0.00352	0.223	0.851	EE_H3K27me3Repressed	L3_promoterTSS	YA_activeEnhancer
chrI	2673515	2673661	peak742	-0.05	0.928	-0.868	0.429	EE_H3K27me3Repressed	L3_transcribedGeneBody	YA_lowSignal
chrI	2678053	2678353	peak743	-1.457	0.000136	1.44	0.121	EE_H3K27me3Repressed	L3_transcribedGeneBody	YA_heterochromatin
chrI	2678566	2678972	peak744	-0.554	0.223	0.442	0.672	EE_lowSignal	L3_transcribedGeneBody	YA_heterochromatin
chrI	2679367	2680077	peak745	-0.909	0.0154	0.746	0.456	EE_repressedEnhancer	L3_activeEnhancer	YA_H3K27me3Repressed
chrI	2681466	2681867	peak746	-0.994	0.00871	0.42	0.711	EE_H3K27me3Repressed	L3_activeEnhancer	NA
chrI	2682695	2683247	peak747	-2.676	3.03e-13	1.07	0.229	EE_H3K27me3Repressed	NA	YA_H3K27me3Repressed
chrI	2683415	2683567	peak748	-0.614	0.274	0.674	0.546	EE_H3K27me3Repressed	L3_repressedEnhancer	YA_H3K27me3Repressed
chrI	2686956	2687088	peak749	-0.02	0.892	-1.065	0.328	EE_repressedEnhancer	L3_repressedEnhancer	YA_activeEnhancer
chrI	2687536	2687913	peak750	0.19	0.737	-0.759	0.45	EE_repressedEnhancer	L3_activeEnhancer	YA_activeEnhancer
chrI	2689056	2689625	peak751	-1.347	0.000215	-0.24	0.853	EE_lowSignal	L3_activeEnhancer	YA_activeEnhancer
chrI	2690126	2690389	peak752	-0.552	0.21	-1.017	0.346	EE_lowSignal	NA	YA_activeEnhancer
chrI	2693428	2693628	peak753	0.403	0.477	-0.283	0.911	EE_lowSignal	L3_lowSignal	YA_heterochromatin
chrI	2696270	2697613	peak754	0.514	0.187	-0.242	0.848	EE_repressedEnhancer	L3_lowSignal	YA_heterochromatin
chrI	2699343	2699547	peak755	0.641	0.0411	-0.106	0.703	EE_H3K27me3Repressed	L3_H3K27me3Repressed	YA_heterochromatin
chrI	2699688	2699838	peak756	0.341	0.407	-0.738	0.747	EE_H3K27me3Repressed	L3_H3K27me3Repressed	YA_heterochromatin
chrI	2703161	2703662	peak757	-1.313	0.000394	1.137	0.204	EE_repressedEnhancer	L3_activeEnhancer	YA_H3K27me3Repressed
chrI	2704309	2704722	peak758	0.008	0.914	0.099	0.923	EE_activeEnhancer	L3_transcribedGeneBody	NA
chrI	2706031	2706393	peak759	-0.083	0.87	1.502	0.128	EE_activeEnhancer	L3_transcribedGeneBody	YA_activeEnhancer
chrI	2707140	2707427	peak760	-0.25	0.607	0.926	0.349	EE_promoterTSS	L3_transcribedGeneBody	YA_activeEnhancer
chrI	2707755	2707982	peak761	0.049	0.927	1.16	0.377	EE_promoterTSS	L3_transcribedGeneBody	YA_repressedEnhancer
chrI	2708111	2708516	peak762	-0.183	0.634	1.322	0.181	EE_transcribedGeneBody	L3_transcribedGeneBody	NA
chrI	2709789	2709898	peak763	0.287	0.656	0.083	0.912	EE_transcribedGeneBody	L3_transcribedGeneBody	YA_activeEnhancer
chrI	2710894	2711462	peak764	0.904	0.0228	-0.634	0.585	EE_activeEnhancer	L3_transcribedGeneBody	YA_repressedEnhancer
chrI	2713821	2714330	peak765	0.989	0.0236	-0.751	0.531	EE_transcribedGeneBody	L3_transcribedGeneBody	YA_transcribedGeneBody
chrI	2726626	2726840	peak766	-0.674	0.0914	0.02	0.98	EE_promoterTSS	L3_promoterTSS	YA_promoterTSS
chrI	2727542	2727948	peak767	-1.969	5.25e-08	0.868	0.365	EE_promoterTSS	L3_promoterTSS	YA_promoterTSS
chrI	2728623	2729117	peak768	-1.064	0.0041	-0.043	0.975	EE_promoterTSS	L3_activeEnhancer	YA_activeEnhancer
chrI	2729999	2730240	peak769	0.78	0.245	-0.855	0.412	EE_transcribedGeneBody	L3_transcribedGeneBody	YA_transcribedGeneBody
chrI	2731001	2731183	peak770	1.88	0.00877	-1.328	0.345	EE_transcribedGeneBody	L3_transcribedGeneBody	YA_transcribedGeneBody
chrI	2735142	2735313	peak771	2.214	0.000402	-0.372	0.943	EE_transcribedGeneBody	L3_transcribedGeneBody	YA_transcribedGeneBody
chrI	2735549	2736880	peak772	1.6	2.39e-05	-1.135	0.181	EE_transcribedGeneBody	L3_transcribedGeneBody	YA_transcribedGeneBody
chrI	2738250	2738631	peak773	1.348	0.000812	-0.646	0.672	EE_activeEnhancer	L3_transcribedGeneBody	YA_transcribedGeneBody
chrI	2739389	2739726	peak774	1.898	1.05e-05	-0.544	0.75	EE_activeEnhancer	L3_transcribedGeneBody	YA_repressedEnhancer
chrI	2739969	2740953	peak775	0.652	0.0865	-0.1	0.944	EE_activeEnhancer	L3_transcribedGeneBody	NA
chrI	2742249	2742339	peak776	1.688	0.00202	-0.294	0.826	EE_promoterTSS	L3_transcribedGeneBody	YA_heterochromatin
chrI	2742974	2743132	peak777	2.722	1.21e-06	-0.451	0.748	EE_promoterTSS	L3_transcribedGeneBody	YA_H3K27me3Repressed
chrI	2744336	2744723	peak778	1.036	0.00643	0.008	0.994	EE_activeEnhancer	L3_transcribedGeneBody	YA_repressedEnhancer
chrI	2744864	2745280	peak779	0.582	0.175	0.545	0.625	EE_activeEnhancer	L3_transcribedGeneBody	NA
chrI	2745885	2746052	peak780	1.863	0.000567	-0.741	0.783	EE_activeEnhancer	L3_transcribedGeneBody	YA_repressedEnhancer
chrI	2747681	2747882	peak781	1.674	0.00192	0.966	0.42	EE_repressedEnhancer	L3_transcribedGeneBody	YA_repressedEnhancer
chrI	2750793	2750998	peak782	0.748	0.266	0.591	0.68	EE_activeEnhancer	L3_lowSignal	YA_activeEnhancer
chrI	2751014	2751350	peak783	1.041	0.0166	0.676	0.638	EE_activeEnhancer	L3_repressedEnhancer	YA_activeEnhancer
chrI	2752735	2753307	peak784	1.563	8.04e-05	-0.795	0.487	EE_activeEnhancer	L3_repressedEnhancer	YA_repressedEnhancer
chrI	2754202	2754354	peak785	0.67	0.215	-0.472	0.681	EE_activeEnhancer	L3_repressedEnhancer	YA_activeEnhancer
chrI	2761287	2761504	peak786	2.205	0.000578	-1.734	0.136	EE_transcribedGeneBody	L3_transcribedGeneBody	YA_activeEnhancer
chrI	2762111	2762371	peak787	1.429	0.00291	-0.239	0.774	EE_promoterTSS	L3_transcribedGeneBody	YA_transcribedGeneBody
chrI	2765510	2765712	peak788	1.869	0.00229	-2.26	0.0419	EE_transcribedGeneBody	L3_transcribedGeneBody	YA_transcribedGeneBody
chrI	2767213	2767457	peak789	0.87	0.266	-1.712	0.121	EE_transcribedGeneBody	L3_transcribedGeneBody	YA_transcribedGeneBody
chrI	2775005	2775257	peak790	0.882	0.111	-0.911	0.415	EE_promoterTSS	L3_transcribedGeneBody	YA_promoterTSS
chrI	2776164	2776377	peak791	-0.914	0.016	0.222	0.93	EE_promoterTSS	L3_promoterTSS	YA_promoterTSS
chrI	2776544	2776815	peak792	0.234	0.799	-0.111	0.958	EE_activeEnhancer	L3_repressedEnhancer	YA_activeEnhancer
chrI	2776957	2777671	peak793	1.354	0.00315	-0.985	0.305	EE_repressedEnhancer	L3_repressedEnhancer	YA_repressedEnhancer
chrI	2777855	2777969	peak794	1.067	0.344	-1.241	0.382	EE_lowSignal	L3_lowSignal	YA_H3K27me3Repressed
chrI	2778355	2778745	peak795	-0.824	0.0542	-1.898	0.00786	EE_repressedEnhancer	L3_H3K27me3Repressed	YA_H3K27me3Repressed
chrI	2781397	2781724	peak796	0.109	0.83	-0.688	0.541	EE_H3K27me3Repressed	L3_H3K27me3Repressed	YA_heterochromatin
chrI	2782834	2783085	peak797	-0.057	0.999	0.389	0.845	EE_H3K27me3Repressed	L3_lowSignal	YA_heterochromatin
chrI	2783233	2784012	peak798	-0.215	0.651	-0.3	0.829	EE_H3K27me3Repressed	L3_H3K27me3Repressed	YA_heterochromatin
chrI	2788177	2788427	peak799	0.438	0.405	-0.52	0.721	EE_lowSignal	L3_lowSignal	YA_heterochromatin
chrI	2788729	2789375	peak800	-0.204	0.705	-0.131	0.951	EE_H3K27me3Repressed	L3_H3K27me3Repressed	YA_heterochromatin
chrI	2791403	2791710	peak801	-1.406	0.000425	0.481	0.773	EE_lowSignal	L3_lowSignal	YA_heterochromatin
chrI	2798241	2798517	peak802	-0.575	0.241	0.192	0.838	EE_H3K27me3Repressed	L3_lowSignal	YA_heterochromatin
chrI	2799033	2799345	peak803	-0.128	0.833	-0.36	0.835	EE_H3K27me3Repressed	L3_lowSignal	YA_heterochromatin
chrI	2799462	2799754	peak804	0.248	0.567	-0.199	0.893	EE_H3K27me3Repressed	L3_lowSignal	YA_H3K27me3Repressed
chrI	2800018	2800275	peak805	0.547	0.294	0.033	0.975	EE_lowSignal	L3_lowSignal	YA_H3K27me3Repressed
chrI	2800457	2801111	peak806	-1.326	0.000376	0.578	0.61	EE_repressedEnhancer	L3_lowSignal	YA_lowSignal
chrI	2804837	2805374	peak807	0.199	0.692	-0.59	0.626	EE_H3K27me3Repressed	L3_H3K27me3Repressed	YA_H3K27me3Repressed
chrI	2806240	2806609	peak808	1.054	0.00965	-1.127	0.263	EE_lowSignal	L3_lowSignal	YA_heterochromatin
chrI	2807668	2807900	peak809	0.294	0.522	0.055	0.965	EE_lowSignal	L3_lowSignal	YA_heterochromatin
chrI	2808832	2809172	peak810	-0.232	0.771	0.034	0.986	EE_H3K27me3Repressed	L3_lowSignal	YA_heterochromatin
chrI	2811299	2811474	peak811	0.19	0.732	-0.139	0.995	EE_H3K27me3Repressed	L3_lowSignal	YA_heterochromatin
chrI	2811968	2812118	peak812	0.773	0.101	-0.476	0.712	EE_lowSignal	L3_lowSignal	YA_heterochromatin
chrI	2812470	2812747	peak813	0.823	0.0554	-0.252	0.838	EE_lowSignal	L3_lowSignal	YA_heterochromatin
chrI	2816904	2817145	peak814	0.886	0.0337	-0.923	0.427	EE_H3K27me3Repressed	L3_lowSignal	YA_heterochromatin
chrI	2821197	2821459	peak815	1.548	0.000594	-1.586	0.116	EE_lowSignal	L3_H3K27me3Repressed	YA_H3K27me3Repressed
chrI	2821616	2821885	peak816	0.381	0.342	-0.566	0.656	EE_lowSignal	L3_H3K27me3Repressed	YA_H3K27me3Repressed
chrI	2823637	2823867	peak817	1.993	0.000287	-1.571	0.205	EE_transcribedGeneBody	L3_transcribedGeneBody	YA_transcribedGeneBody
chrI	2825756	2826037	peak818	0.496	0.254	0.054	0.987	EE_activeEnhancer	L3_transcribedGeneBody	YA_transcribedGeneBody
chrI	2826170	2827175	peak819	1.214	0.00191	-0.513	0.681	EE_activeEnhancer	L3_transcribedGeneBody	YA_transcribedGeneBody
chrI	2829097	2829387	peak820	2.729	1.16e-10	-0.537	0.528	EE_promoterTSS	L3_transcribedGeneBody	YA_transcribedGeneBody
chrI	2831326	2832078	peak821	-0.148	0.742	-0.117	0.933	EE_promoterTSS	L3_activeEnhancer	YA_activeEnhancer
chrI	2833219	2833369	peak822	0.675	0.412	0.032	0.888	EE_activeEnhancer	L3_transcribedGeneBody	YA_activeEnhancer
chrI	2834197	2834467	peak823	1.804	4.35e-05	0.691	0.634	EE_activeEnhancer	L3_transcribedGeneBody	YA_repressedEnhancer
chrI	2835283	2835576	peak824	-0.135	0.819	0.97	0.39	EE_activeEnhancer	L3_transcribedGeneBody	YA_activeEnhancer
chrI	2835727	2836068	peak825	0.639	0.142	0.723	0.506	EE_activeEnhancer	L3_transcribedGeneBody	YA_activeEnhancer
chrI	2836884	2837093	peak826	0.619	0.0943	0.423	0.778	EE_activeEnhancer	L3_transcribedGeneBody	YA_H3K27me3Repressed
chrI	2837846	2838120	peak827	0.701	0.0847	-0.113	0.98	EE_repressedEnhancer	L3_transcribedGeneBody	YA_H3K27me3Repressed
chrI	2838401	2838602	peak828	1.138	0.00914	1.087	0.376	EE_repressedEnhancer	L3_transcribedGeneBody	YA_heterochromatin
chrI	2840155	2840412	peak829	-0.32	0.591	0.548	0.623	EE_activeEnhancer	L3_transcribedGeneBody	YA_repressedEnhancer
chrI	2840773	2841295	peak830	0.907	0.0209	0.816	0.426	EE_activeEnhancer	L3_repressedEnhancer	YA_repressedEnhancer
chrI	2844102	2844773	peak831	0.587	0.146	0.348	0.74	EE_activeEnhancer	L3_repressedEnhancer	YA_H3K27me3Repressed
chrI	2845534	2845988	peak832	1.003	0.0297	0.034	0.96	EE_activeEnhancer	L3_lowSignal	YA_heterochromatin
chrI	2847282	2847535	peak833	0.513	0.263	0.589	0.802	EE_lowSignal	L3_lowSignal	YA_heterochromatin
chrI	2847881	2848251	peak834	1.406	0.00372	-1.497	0.165	EE_H3K27me3Repressed	L3_lowSignal	YA_heterochromatin
chrI	2855451	2855664	peak835	-0.547	0.288	-0.091	0.999	EE_H3K27me3Repressed	L3_transcribedGeneBody	YA_activeEnhancer
chrI	2857692	2857864	peak836	-1.486	0.000193	0.827	0.553	EE_repressedEnhancer	L3_promoterTSS	YA_activeEnhancer
chrI	2859790	2859988	peak837	-0.371	0.568	0.23	0.912	EE_repressedEnhancer	L3_transcribedGeneBody	YA_repressedEnhancer
chrI	2861089	2861350	peak838	-1.56	2.15e-05	0.173	0.848	EE_repressedEnhancer	L3_activeEnhancer	YA_activeEnhancer
chrI	2863887	2864493	peak839	-1.391	0.000109	-0.397	0.74	EE_activeEnhancer	L3_promoterTSS	YA_activeEnhancer
chrI	2869777	2870164	peak840	-0.894	0.0206	0.443	0.772	EE_activeEnhancer	L3_activeEnhancer	YA_activeEnhancer
chrI	2875166	2876359	peak841	-0.814	0.0307	-0.685	0.492	EE_transcribedGeneBody	L3_promoterTSS	YA_promoterTSS
chrI	2876382	2876974	peak842	-1.901	1.16e-07	0.047	0.975	EE_promoterTSS	L3_promoterTSS	YA_promoterTSS
chrI	2877120	2878082	peak843	-0.226	0.621	-0.583	0.568	EE_promoterTSS	L3_promoterTSS	YA_promoterTSS
chrI	2879132	2879317	peak844	0.81	0.253	-0.951	0.448	EE_transcribedGeneBody	L3_transcribedGeneBody	YA_promoterTSS
chrI	2885767	2886068	peak845	0.925	0.0683	-0.304	0.781	EE_transcribedGeneBody	L3_transcribedGeneBody	YA_transcribedGeneBody
chrI	2886303	2886427	peak846	1.112	0.177	-0.804	0.874	EE_promoterTSS	L3_transcribedGeneBody	YA_transcribedGeneBody
chrI	2887189	2887582	peak847	1.988	2.31e-07	-0.673	0.585	EE_activeEnhancer	L3_activeEnhancer	YA_activeEnhancer
chrI	2887582	2888297	peak848	1.988	2.31e-07	-0.673	0.585	EE_promoterTSS	L3_transcribedGeneBody	YA_transcribedGeneBody
chrI	2888568	2889228	peak849	2.95	1.64e-10	-0.832	0.719	EE_promoterTSS	L3_transcribedGeneBody	YA_transcribedGeneBody
chrI	2890627	2890901	peak850	3.495	2.68e-11	-1.761	0.242	EE_promoterTSS	L3_transcribedGeneBody	YA_transcribedGeneBody
chrI	2895581	2895856	peak851	0.47	0.246	0.026	0.94	EE_promoterTSS	L3_transcribedGeneBody	YA_transcribedGeneBody
chrI	2896287	2897119	peak852	0.639	0.188	-0.883	0.404	EE_transcribedGeneBody	L3_transcribedGeneBody	YA_transcribedGeneBody
chrI	2898112	2898552	peak853	0.176	0.785	-0.68	0.539	EE_transcribedGeneBody	L3_transcribedGeneBody	YA_transcribedGeneBody
chrI	2898635	2898894	peak854	0.775	0.175	-1.256	0.269	EE_transcribedGeneBody	L3_transcribedGeneBody	YA_transcribedGeneBody
chrI	2900002	2900395	peak855	0.018	0.813	-0.693	0.465	EE_transcribedGeneBody	L3_transcribedGeneBody	YA_promoterTSS
chrI	2900993	2901192	peak856	-0.856	0.0226	0.199	0.888	EE_promoterTSS	L3_promoterTSS	YA_promoterTSS
chrI	2902431	2902582	peak857	0.615	0.165	-1.05	0.372	EE_transcribedGeneBody	L3_transcribedGeneBody	YA_transcribedGeneBody
chrI	2903956	2904155	peak858	0.952	0.403	-0.972	0.641	EE_activeEnhancer	L3_repressedEnhancer	YA_activeEnhancer
chrI	2905712	2905896	peak859	1.004	0.194	-2.728	0.00117	EE_transcribedGeneBody	L3_repressedEnhancer	YA_promoterTSS
chrI	2915210	2915570	peak860	0.674	0.175	-0.747	0.45	EE_transcribedGeneBody	L3_promoterTSS	YA_activeEnhancer
chrI	2927700	2928021	peak861	0.309	0.73	-0.977	0.427	EE_promoterTSS	L3_promoterTSS	YA_promoterTSS
chrI	2928059	2929362	peak862	-0.604	0.12	-0.382	0.737	EE_promoterTSS	L3_promoterTSS	YA_promoterTSS
chrI	2929659	2929822	peak863	0.115	0.531	-1.195	0.381	EE_promoterTSS	L3_promoterTSS	YA_promoterTSS
chrI	2935577	2935913	peak864	-1.392	0.000192	0.157	0.915	EE_transcribedGeneBody	L3_transcribedGeneBody	YA_promoterTSS
chrI	2939935	2940022	peak865	-0.008	0.891	-0.389	0.769	EE_transcribedGeneBody	L3_transcribedGeneBody	YA_transcribedGeneBody
chrI	2944273	2944578	peak866	0.567	0.262	-0.234	0.76	EE_lowSignal	L3_transcribedGeneBody	YA_transcribedGeneBody
chrI	2945400	2945685	peak867	0.128	0.859	0.629	0.732	EE_repressedEnhancer	L3_lowSignal	YA_transcribedGeneBody
chrI	2945808	2945989	peak868	-0.226	0.799	-0.069	0.935	EE_transcribedGeneBody	L3_lowSignal	YA_transcribedGeneBody
chrI	2949868	2950075	peak869	1.885	0.000274	-0.529	0.619	EE_lowSignal	L3_transcribedGeneBody	YA_transcribedGeneBody
chrI	2950265	2950562	peak870	0.532	0.155	0.534	0.865	EE_lowSignal	L3_transcribedGeneBody	YA_lowSignal
chrI	2950772	2951157	peak871	0.315	0.445	-0.532	0.636	EE_lowSignal	L3_lowSignal	YA_lowSignal
chrI	2951434	2951967	peak872	0.368	0.473	0.485	0.809	EE_lowSignal	L3_transcribedGeneBody	YA_lowSignal
chrI	2957006	2957088	peak873	-0.039	0.899	0.654	0.792	EE_lowSignal	L3_transcribedGeneBody	YA_transcribedGeneBody
chrI	2960561	2960987	peak874	0.121	0.974	0.16	0.876	EE_repressedEnhancer	L3_transcribedGeneBody	NA
chrI	2962031	2962390	peak875	-1.12	0.00373	0.93	0.385	EE_repressedEnhancer	L3_activeEnhancer	YA_activeEnhancer
chrI	2964499	2964656	peak876	2.004	0.000226	0.602	0.636	EE_activeEnhancer	L3_repressedEnhancer	YA_repressedEnhancer
chrI	2966359	2966708	peak877	0.607	0.136	0.419	0.716	EE_repressedEnhancer	L3_repressedEnhancer	YA_repressedEnhancer
chrI	2967014	2967150	peak878	0.176	0.588	-0.448	0.74	EE_repressedEnhancer	L3_lowSignal	YA_repressedEnhancer
chrI	2967464	2968023	peak879	-0.56	0.155	1.454	0.0879	EE_repressedEnhancer	L3_repressedEnhancer	YA_repressedEnhancer
chrI	2969608	2969901	peak880	1.481	0.0002	-0.089	0.927	EE_repressedEnhancer	L3_repressedEnhancer	YA_repressedEnhancer
chrI	2970665	2970941	peak881	-0.157	0.811	0.238	0.796	EE_repressedEnhancer	L3_repressedEnhancer	YA_repressedEnhancer
chrI	2970973	2971307	peak882	0.76	0.0663	1.542	0.188	EE_repressedEnhancer	L3_repressedEnhancer	YA_repressedEnhancer
chrI	2972351	2972501	peak883	1.959	0.00215	-0.882	0.578	EE_repressedEnhancer	L3_H3K27me3Repressed	YA_H3K27me3Repressed
chrI	2976287	2976587	peak884	1.296	0.00594	-0.215	0.869	EE_repressedEnhancer	L3_repressedEnhancer	YA_H3K27me3Repressed
chrI	2977877	2978091	peak885	1.161	0.00955	0.318	0.958	EE_lowSignal	L3_lowSignal	YA_heterochromatin
chrI	2978361	2978865	peak886	1.408	0.00047	0.364	0.797	EE_activeEnhancer	L3_repressedEnhancer	YA_H3K27me3Repressed
chrI	2985087	2985438	peak887	0.677	0.147	-0.534	0.701	EE_activeEnhancer	L3_repressedEnhancer	YA_transcribedGeneBody
chrI	3004016	3004213	peak888	-1.969	1.93e-06	1.035	0.381	EE_transcribedGeneBody	L3_promoterTSS	YA_promoterTSS
chrI	3010055	3012872	peak889	-0.737	0.0509	-0.301	0.806	EE_transcribedGeneBody	L3_transcribedGeneBody	YA_transcribedGeneBody
chrI	3017948	3018139	peak890	2.6	5.97e-05	-0.627	0.803	EE_transcribedGeneBody	L3_transcribedGeneBody	YA_transcribedGeneBody
chrI	3031611	3031812	peak891	0.693	0.176	-0.616	0.57	EE_transcribedGeneBody	L3_transcribedGeneBody	YA_transcribedGeneBody
chrI	3035263	3035432	peak892	1.535	0.031	-0.847	0.591	EE_promoterTSS	L3_repressedEnhancer	YA_activeEnhancer
chrI	3038570	3038734	peak893	0.986	0.171	0.157	0.928	EE_lowSignal	L3_heterochromatin	YA_lowSignal
chrI	3040912	3041069	peak894	2.678	3.06e-05	-2.215	0.0435	EE_lowSignal	L3_H3K27me3Repressed	YA_H3K27me3Repressed
chrI	3042727	3043142	peak895	-0.518	0.251	0.065	0.977	EE_H3K27me3Repressed	L3_heterochromatin	YA_heterochromatin
chrI	3044528	3044714	peak896	0.897	0.0814	-0.498	0.75	EE_lowSignal	L3_H3K27me3Repressed	YA_H3K27me3Repressed
chrI	3045177	3045395	peak897	2.023	0.00059	-0.558	0.772	EE_H3K27me3Repressed	L3_H3K27me3Repressed	YA_H3K27me3Repressed
chrI	3059058	3059333	peak898	-1.288	0.00118	-0.104	0.96	EE_promoterTSS	L3_promoterTSS	YA_promoterTSS
chrI	3069641	3070034	peak899	0.804	0.195	-1.636	0.0748	EE_promoterTSS	L3_promoterTSS	YA_promoterTSS
chrI	3070170	3070353	peak900	-1.232	0.0025	0.222	0.929	EE_promoterTSS	L3_transcribedGeneBody	YA_promoterTSS
chrI	3071325	3071485	peak901	1.239	0.0307	-1.333	0.442	EE_transcribedGeneBody	L3_transcribedGeneBody	YA_transcribedGeneBody
chrI	3087150	3087420	peak902	-1.967	3.59e-07	0.84	0.434	EE_transcribedGeneBody	L3_transcribedGeneBody	YA_promoterTSS
chrI	3089126	3089319	peak903	2.037	0.00232	-0.492	0.89	EE_activeEnhancer	L3_transcribedGeneBody	YA_transcribedGeneBody
chrI	3096212	3096461	peak904	-0.564	0.111	0.011	0.951	EE_transcribedGeneBody	L3_activeEnhancer	YA_activeEnhancer
chrI	3099927	3100094	peak905	0.881	0.177	-1.336	0.425	EE_transcribedGeneBody	L3_activeEnhancer	YA_activeEnhancer
chrI	3100753	3101198	peak906	-0.405	0.348	1.145	0.319	EE_activeEnhancer	L3_activeEnhancer	YA_activeEnhancer
chrI	3101648	3102099	peak907	-1.726	1.85e-06	0.609	0.563	EE_activeEnhancer	L3_activeEnhancer	YA_activeEnhancer
chrI	3106485	3106823	peak908	0.965	0.0384	0.19	0.856	EE_activeEnhancer	L3_transcribedGeneBody	YA_repressedEnhancer
chrI	3107666	3107821	peak909	1.54	0.0325	-1.709	0.192	EE_lowSignal	L3_transcribedGeneBody	YA_transcribedGeneBody
chrI	3110656	3110936	peak910	-1.116	0.00664	1.095	0.376	EE_H3K27me3Repressed	L3_lowSignal	YA_H3K27me3Repressed
chrI	3117305	3117595	peak911	0.263	0.67	-0.843	0.473	EE_repressedEnhancer	L3_transcribedGeneBody	YA_H3K27me3Repressed
chrI	3118993	3119403	peak912	-1.83	1.34e-06	0.088	0.987	EE_lowSignal	L3_lowSignal	NA
chrI	3121999	3122210	peak913	-0.265	0.198	-1.221	0.409	EE_lowSignal	L3_lowSignal	YA_repressedEnhancer
chrI	3137816	3139434	peak914	0.005	0.965	-0.504	0.641	EE_lowSignal	L3_lowSignal	YA_heterochromatin
chrI	3140628	3140802	peak915	-0.236	0.421	-0.195	0.817	EE_lowSignal	L3_lowSignal	YA_lowSignal
chrI	3144844	3145481	peak916	0.226	0.649	-0.172	0.858	EE_transcribedGeneBody	L3_transcribedGeneBody	YA_transcribedGeneBody
chrI	3147811	3148015	peak917	-0.798	0.0233	0.021	0.989	EE_promoterTSS	L3_lowSignal	YA_promoterTSS
chrI	3149929	3150079	peak918	1.898	0.00812	-1.892	0.109	EE_transcribedGeneBody	L3_lowSignal	YA_transcribedGeneBody
chrI	3151150	3151265	peak919	1.59	0.043	-0.823	0.675	EE_lowSignal	L3_lowSignal	YA_transcribedGeneBody
chrI	3152065	3152812	peak920	1.173	0.012	-3.351	1.65e-07	EE_repressedEnhancer	L3_lowSignal	YA_H3K27me3Repressed
chrI	3159139	3159289	peak921	0.192	0.972	-0.803	0.597	EE_transcribedGeneBody	L3_transcribedGeneBody	YA_transcribedGeneBody
chrI	3160380	3162289	peak922	-0.095	0.87	-0.443	0.679	EE_transcribedGeneBody	L3_transcribedGeneBody	YA_transcribedGeneBody
chrI	3162475	3163076	peak923	-0.966	0.00836	-0.463	0.698	EE_promoterTSS	L3_promoterTSS	YA_promoterTSS
chrI	3173412	3173666	peak924	0.914	0.128	-0.314	0.782	EE_transcribedGeneBody	L3_transcribedGeneBody	YA_transcribedGeneBody
chrI	3192654	3192881	peak925	-0.553	0.0769	-0.483	0.862	EE_promoterTSS	L3_promoterTSS	NA
chrI	3208992	3209435	peak926	0.431	0.334	-0.516	0.673	EE_lowSignal	L3_heterochromatin	YA_heterochromatin
chrI	3227090	3227386	peak927	-0.152	0.86	-0.45	0.724	EE_promoterTSS	L3_transcribedGeneBody	YA_transcribedGeneBody
chrI	3227506	3227780	peak928	0.039	0.958	-0.659	0.611	EE_promoterTSS	L3_transcribedGeneBody	YA_promoterTSS
chrI	3227957	3228212	peak929	-1.101	0.00406	-0.349	0.775	EE_promoterTSS	L3_promoterTSS	YA_promoterTSS
chrI	3246164	3247329	peak930	-1.563	1.15e-05	0.567	0.578	EE_H3K27me3Repressed	L3_promoterTSS	YA_promoterTSS
chrI	3247323	3247804	peak931	-1.563	1.15e-05	0.567	0.578	EE_repressedEnhancer	L3_activeEnhancer	YA_promoterTSS
chrI	3247831	3248867	peak932	-2.099	4.14e-09	0.778	0.415	EE_H3K27me3Repressed	L3_activeEnhancer	YA_activeEnhancer
chrI	3249033	3249520	peak933	-1.266	0.000599	0.506	0.648	EE_repressedEnhancer	L3_activeEnhancer	YA_activeEnhancer
chrI	3256560	3257175	peak934	-0.236	0.665	-0.785	0.426	EE_lowSignal	L3_lowSignal	YA_H3K27me3Repressed
chrI	3258587	3259013	peak935	-0.193	0.869	-0.641	0.49	EE_lowSignal	L3_lowSignal	YA_heterochromatin
chrI	3259241	3259577	peak936	0.017	0.893	0.065	0.944	EE_lowSignal	L3_H3K27me3Repressed	YA_heterochromatin
chrI	3260977	3261770	peak937	0.241	0.637	-0.684	0.532	EE_H3K27me3Repressed	L3_lowSignal	YA_heterochromatin
chrI	3265958	3266176	peak938	-1.561	3.41e-05	0.788	0.502	EE_promoterTSS	L3_promoterTSS	YA_promoterTSS
chrI	3266677	3266884	peak939	-0.282	0.331	0.157	0.921	EE_promoterTSS	L3_promoterTSS	YA_promoterTSS
chrI	3267070	3268375	peak940	0.146	0.759	-0.51	0.647	EE_promoterTSS	L3_promoterTSS	YA_promoterTSS
chrI	3269613	3269840	peak941	0.282	0.384	-0.632	0.504	EE_transcribedGeneBody	L3_transcribedGeneBody	YA_transcribedGeneBody
chrI	3270235	3270697	peak942	-0.468	0.291	-0.543	0.651	EE_lowSignal	L3_lowSignal	YA_transcribedGeneBody
chrI	3272763	3273226	peak943	-0.287	0.619	-0.298	0.752	EE_H3K27me3Repressed	L3_H3K27me3Repressed	YA_transcribedGeneBody
chrI	3274297	3274779	peak944	-0.316	0.5	-0.507	0.659	EE_H3K27me3Repressed	L3_H3K27me3Repressed	YA_transcribedGeneBody
chrI	3274719	3275024	peak945	-0.316	0.5	-0.507	0.659	EE_H3K27me3Repressed	L3_lowSignal	YA_transcribedGeneBody
chrI	3277829	3278060	peak946	-1.378	0.00031	0.267	0.855	EE_lowSignal	L3_lowSignal	YA_transcribedGeneBody
chrI	3280127	3280319	peak947	1.539	0.000114	-1.286	0.117	EE_lowSignal	L3_lowSignal	YA_H3K27me3Repressed
chrI	3281331	3281803	peak948	-0.625	0.161	-0.316	0.794	EE_H3K27me3Repressed	L3_H3K27me3Repressed	YA_H3K27me3Repressed
chrI	3289005	3290855	peak949	-0.138	0.769	0.144	0.913	EE_H3K27me3Repressed	L3_lowSignal	YA_heterochromatin
chrI	3291447	3291634	peak950	-0.361	0.514	-0.421	0.868	EE_lowSignal	L3_H3K27me3Repressed	YA_heterochromatin
chrI	3291920	3292224	peak951	-0.41	0.345	-0.067	1	EE_H3K27me3Repressed	L3_lowSignal	YA_heterochromatin
chrI	3292616	3292971	peak952	-0.221	0.523	-0.784	0.52	EE_H3K27me3Repressed	L3_lowSignal	YA_H3K27me3Repressed
chrI	3293289	3293550	peak953	-0.495	0.366	-0.107	0.938	EE_lowSignal	L3_lowSignal	YA_repressedEnhancer
chrI	3306599	3308169	peak954	-0.422	0.313	0.006	0.99	NA	L3_transcribedGeneBody	YA_lowSignal
chrI	3309609	3309921	peak955	-1.433	0.000198	0.021	0.999	EE_H3K27me3Repressed	L3_lowSignal	YA_activeEnhancer
chrI	3313111	3313392	peak956	-0.691	0.114	0.555	0.608	EE_lowSignal	L3_lowSignal	YA_H3K27me3Repressed
chrI	3316508	3316825	peak957	-2.112	4.86e-08	0.631	0.689	EE_repressedEnhancer	L3_repressedEnhancer	YA_repressedEnhancer
chrI	3324948	3325258	peak958	-2.088	2.62e-08	1.009	0.408	EE_transcribedGeneBody	L3_activeEnhancer	YA_transcribedGeneBody
chrI	3330791	3331131	peak959	-1.429	0.000144	0.199	0.889	EE_transcribedGeneBody	L3_activeEnhancer	YA_activeEnhancer
chrI	3332605	3333090	peak960	-0.246	0.582	0.374	0.757	EE_activeEnhancer	L3_activeEnhancer	YA_activeEnhancer
chrI	3334303	3334895	peak961	-1.444	6.17e-05	0.32	0.794	EE_activeEnhancer	L3_activeEnhancer	YA_activeEnhancer
chrI	3335971	3336521	peak962	0.018	0.997	0.116	0.94	EE_repressedEnhancer	L3_repressedEnhancer	YA_repressedEnhancer
chrI	3338296	3338615	peak963	0.262	0.713	0.867	0.4	EE_activeEnhancer	L3_activeEnhancer	YA_activeEnhancer
chrI	3349891	3350161	peak964	-0.965	0.00555	0.169	0.971	EE_promoterTSS	L3_promoterTSS	YA_lowSignal
chrI	3351266	3352172	peak965	1.331	0.00117	-0.732	0.498	EE_lowSignal	L3_lowSignal	NA
chrI	3354677	3354872	peak966	0.544	0.301	0.582	0.71	EE_H3K27me3Repressed	L3_lowSignal	YA_heterochromatin
chrI	3355245	3355497	peak967	0.237	0.585	0.181	0.951	EE_H3K27me3Repressed	L3_lowSignal	YA_heterochromatin
chrI	3355611	3357011	peak968	-0.109	0.828	-0.287	0.822	EE_H3K27me3Repressed	L3_H3K27me3Repressed	YA_heterochromatin
chrI	3366836	3367304	peak969	0.482	0.335	-1.121	0.21	EE_lowSignal	L3_lowSignal	YA_lowSignal
chrI	3367892	3368588	peak970	0.881	0.0541	-1.95	0.0105	EE_transcribedGeneBody	NA	YA_transcribedGeneBody
chrI	3376312	3376577	peak971	0.335	0.471	-1.091	0.385	EE_H3K27me3Repressed	L3_transcribedGeneBody	YA_H3K27me3Repressed
chrI	3381640	3381954	peak972	-0.751	0.0574	0.08	0.923	EE_H3K27me3Repressed	L3_activeEnhancer	YA_activeEnhancer
chrI	3382650	3382841	peak973	-0.372	0.367	0.613	0.535	EE_lowSignal	L3_lowSignal	YA_H3K27me3Repressed
chrI	3384915	3385236	peak974	-0.253	0.708	0.238	0.933	EE_H3K27me3Repressed	L3_lowSignal	YA_H3K27me3Repressed
chrI	3385308	3385462	peak975	0.124	0.897	0.766	0.672	EE_H3K27me3Repressed	L3_lowSignal	YA_H3K27me3Repressed
chrI	3386385	3386760	peak976	-1.484	0.000124	1.141	0.21	EE_H3K27me3Repressed	L3_lowSignal	YA_H3K27me3Repressed
chrI	3397577	3397769	peak977	2.041	0.000977	-0.761	0.677	EE_H3K27me3Repressed	L3_lowSignal	YA_H3K27me3Repressed
chrI	3398332	3398849	peak978	1.434	0.00119	-0.878	0.522	EE_H3K27me3Repressed	L3_heterochromatin	YA_heterochromatin
chrI	3399628	3399843	peak979	1.068	0.0158	-0.311	0.646	EE_H3K27me3Repressed	L3_heterochromatin	YA_H3K27me3Repressed
chrI	3401920	3402377	peak980	0.523	0.173	-0.488	0.671	EE_lowSignal	L3_lowSignal	YA_H3K27me3Repressed
chrI	3402869	3403040	peak981	1.86	0.00393	0.136	0.846	EE_lowSignal	L3_lowSignal	YA_heterochromatin
chrI	3403574	3403725	peak982	0.547	0.283	0.32	0.956	EE_repressedEnhancer	L3_lowSignal	YA_heterochromatin
chrI	3404190	3404355	peak983	-1.1	0.0131	0.397	0.774	EE_H3K27me3Repressed	L3_lowSignal	YA_H3K27me3Repressed
chrI	3405558	3406152	peak984	-1.96	7.15e-08	1.191	0.177	EE_H3K27me3Repressed	L3_lowSignal	YA_H3K27me3Repressed
chrI	3409785	3410010	peak985	0.116	0.983	0.839	0.545	EE_promoterTSS	L3_repressedEnhancer	YA_promoterTSS
chrI	3414644	3414991	peak986	0.093	0.611	-0.179	0.887	EE_activeEnhancer	L3_transcribedGeneBody	YA_promoterTSS
chrI	3416379	3416621	peak987	0.126	0.951	-0.006	0.934	EE_lowSignal	L3_activeEnhancer	YA_transcribedGeneBody
chrI	3419350	3419719	peak988	-0.483	0.254	-0.035	0.965	EE_repressedEnhancer	L3_repressedEnhancer	YA_H3K27me3Repressed
chrI	3421189	3421445	peak989	0.592	0.27	0.046	0.995	EE_repressedEnhancer	L3_lowSignal	YA_heterochromatin
chrI	3427318	3429313	peak990	-1.213	0.000775	-0.022	0.986	EE_H3K27me3Repressed	NA	YA_heterochromatin
chrI	3434953	3435103	peak991	-0.132	0.934	-0.164	0.946	EE_transcribedGeneBody	L3_transcribedGeneBody	YA_transcribedGeneBody
chrI	3435328	3435555	peak992	-0.067	0.892	-1.033	0.4	EE_transcribedGeneBody	L3_transcribedGeneBody	YA_transcribedGeneBody
chrI	3437113	3437320	peak993	0.357	0.375	0.072	0.97	EE_transcribedGeneBody	L3_transcribedGeneBody	YA_transcribedGeneBody
chrI	3438043	3438222	peak994	0.277	0.513	-0.153	0.774	EE_transcribedGeneBody	L3_promoterTSS	YA_promoterTSS
chrI	3439636	3439960	peak995	0.509	0.268	-0.971	0.316	EE_promoterTSS	L3_promoterTSS	YA_activeEnhancer
chrI	3440742	3441021	peak996	2.804	6.96e-06	-1.427	0.25	EE_transcribedGeneBody	L3_H3K27me3Repressed	YA_transcribedGeneBody
chrI	3441911	3442088	peak997	3.608	3.66e-09	-1.183	0.388	EE_transcribedGeneBody	L3_H3K27me3Repressed	YA_transcribedGeneBody
chrI	3445675	3445915	peak998	2.313	0.000211	-1.53	0.264	EE_promoterTSS	L3_transcribedGeneBody	YA_transcribedGeneBody
chrI	3470934	3471680	peak999	0.154	0.811	-0.844	0.416	EE_transcribedGeneBody	L3_transcribedGeneBody	YA_transcribedGeneBody
chrI	3472823	3473030	peak1000	0.524	0.628	-0.868	0.601	EE_transcribedGeneBody	L3_transcribedGeneBody	YA_transcribedGeneBody
chrI	3475123	3475273	peak1001	1.867	0.00452	-1.223	0.474	EE_transcribedGeneBody	L3_transcribedGeneBody	YA_transcribedGeneBody
chrI	3484250	3484410	peak1002	-0.089	0.978	0.695	0.711	EE_transcribedGeneBody	L3_transcribedGeneBody	YA_transcribedGeneBody
chrI	3490262	3490936	peak1003	0.865	0.0201	-0.938	0.317	EE_H3K27me3Repressed	L3_H3K27me3Repressed	YA_heterochromatin
chrI	3492857	3493505	peak1004	0.765	0.0435	-0.35	0.729	EE_lowSignal	L3_lowSignal	YA_heterochromatin
chrI	3494356	3494531	peak1005	1.119	0.0161	0.101	0.947	EE_lowSignal	L3_lowSignal	YA_heterochromatin
chrI	3499487	3499917	peak1006	1.279	0.0017	-0.355	0.835	EE_repressedEnhancer	L3_lowSignal	NA
chrI	3500750	3501543	peak1007	-0.485	0.204	0.148	0.914	EE_activeEnhancer	L3_activeEnhancer	YA_activeEnhancer
chrI	3502675	3502941	peak1008	0.188	0.815	-1.23	0.266	EE_transcribedGeneBody	L3_activeEnhancer	YA_lowSignal
chrI	3504999	3505184	peak1009	1.177	0.0635	-0.844	0.754	EE_transcribedGeneBody	L3_transcribedGeneBody	YA_transcribedGeneBody
chrI	3514004	3514678	peak1010	-1.968	4.71e-08	0.624	0.55	EE_promoterTSS	L3_promoterTSS	YA_activeEnhancer
chrI	3529688	3530295	peak1011	-0.437	0.24	-0.08	0.951	EE_lowSignal	L3_lowSignal	YA_heterochromatin
chrI	3530870	3531289	peak1012	-1.264	0.000471	0.162	0.897	EE_lowSignal	L3_lowSignal	YA_heterochromatin
chrI	3533753	3534018	peak1013	-1.591	5.21e-05	0.094	0.982	EE_H3K27me3Repressed	L3_lowSignal	YA_H3K27me3Repressed
chrI	3551962	3552295	peak1014	0.938	0.106	-0.734	0.472	EE_transcribedGeneBody	L3_transcribedGeneBody	YA_transcribedGeneBody
chrI	3560000	3560343	peak1015	-0.193	0.629	0.182	0.957	EE_activeEnhancer	L3_lowSignal	YA_transcribedGeneBody
chrI	3562592	3563138	peak1016	-0.612	0.0779	-0.261	0.863	EE_transcribedGeneBody	NA	NA
chrI	3563837	3564156	peak1017	0.827	0.408	-1.685	0.0793	EE_repressedEnhancer	L3_lowSignal	YA_transcribedGeneBody
chrI	3576547	3577341	peak1018	-0.326	0.467	-0.05	0.977	EE_transcribedGeneBody	L3_transcribedGeneBody	YA_transcribedGeneBody
chrI	3583894	3584406	peak1019	-0.047	0.909	-0.42	0.731	EE_transcribedGeneBody	L3_transcribedGeneBody	YA_transcribedGeneBody
chrI	3601546	3601778	peak1020	0.734	0.0829	-1.057	0.312	EE_repressedEnhancer	L3_lowSignal	YA_transcribedGeneBody
chrI	3602496	3602651	peak1021	-0.028	0.63	0.12	0.957	EE_transcribedGeneBody	L3_lowSignal	YA_transcribedGeneBody
chrI	3602746	3602953	peak1022	0.56	0.24	0.732	0.641	EE_activeEnhancer	L3_lowSignal	YA_transcribedGeneBody
chrI	3603132	3603717	peak1023	1.325	0.000496	-0.707	0.507	EE_promoterTSS	L3_repressedEnhancer	YA_transcribedGeneBody
chrI	3609164	3609304	peak1024	1.484	0.0691	-0.99	0.569	EE_transcribedGeneBody	L3_lowSignal	YA_transcribedGeneBody
chrI	3618007	3618157	peak1025	0.991	0.15	-1.465	0.569	EE_lowSignal	L3_lowSignal	YA_lowSignal
chrI	3619015	3619349	peak1026	0.329	0.317	-0.593	0.602	EE_lowSignal	L3_lowSignal	YA_heterochromatin
chrI	3620335	3620623	peak1027	-0.032	0.939	0.887	0.381	EE_repressedEnhancer	L3_lowSignal	YA_H3K27me3Repressed
chrI	3621989	3622271	peak1028	1.031	0.0786	0.175	0.942	EE_lowSignal	L3_lowSignal	YA_H3K27me3Repressed
chrI	3625803	3626112	peak1029	-0.026	0.991	-0.365	0.818	EE_lowSignal	L3_activeEnhancer	NA
chrI	3627047	3627360	peak1030	-1.305	0.000712	1.126	0.245	EE_lowSignal	L3_activeEnhancer	YA_lowSignal
chrI	3628534	3628826	peak1031	0.348	0.407	0.624	0.661	EE_H3K27me3Repressed	L3_transcribedGeneBody	YA_repressedEnhancer
chrI	3631871	3632282	peak1032	0.066	0.876	0.902	0.406	EE_lowSignal	L3_transcribedGeneBody	YA_transcribedGeneBody
chrI	3632374	3632650	peak1033	-0.054	0.9	0.401	0.725	EE_repressedEnhancer	L3_transcribedGeneBody	YA_transcribedGeneBody
chrI	3632904	3633602	peak1034	-0.039	0.979	-0.007	0.993	EE_transcribedGeneBody	L3_transcribedGeneBody	YA_transcribedGeneBody
chrI	3636559	3636848	peak1035	-0.409	0.306	0.155	0.899	EE_promoterTSS	L3_promoterTSS	YA_activeEnhancer
chrI	3638791	3639196	peak1036	-1.206	0.000949	-0.536	0.621	EE_lowSignal	L3_lowSignal	YA_activeEnhancer
chrI	3640617	3640953	peak1037	-0.262	0.657	0.357	0.776	EE_H3K27me3Repressed	L3_lowSignal	YA_lowSignal
chrI	3641986	3642265	peak1038	-0.187	0.717	0.204	0.871	EE_H3K27me3Repressed	L3_transcribedGeneBody	YA_H3K27me3Repressed
chrI	3642395	3642764	peak1039	-0.048	0.968	0.066	0.997	EE_H3K27me3Repressed	L3_transcribedGeneBody	YA_H3K27me3Repressed
chrI	3647920	3648528	peak1040	-3.303	5.41e-19	0.682	0.494	EE_H3K27me3Repressed	NA	YA_activeEnhancer
chrI	3650734	3650997	peak1041	-2.234	5.56e-09	0.965	0.305	EE_H3K27me3Repressed	L3_activeEnhancer	YA_H3K27me3Repressed
chrI	3654976	3655245	peak1042	0.951	0.397	-1.246	0.314	EE_H3K27me3Repressed	L3_H3K27me3Repressed	YA_heterochromatin
chrI	3657265	3657400	peak1043	1.798	0.00359	-1.169	0.338	EE_lowSignal	L3_lowSignal	YA_lowSignal
chrI	3671599	3672188	peak1044	-0.886	0.0158	0.626	0.559	EE_lowSignal	L3_promoterTSS	YA_activeEnhancer
chrI	3672658	3672904	peak1045	-1.885	8.23e-07	0.442	0.711	EE_lowSignal	L3_lowSignal	YA_activeEnhancer
chrI	3676982	3677249	peak1046	0.661	0.306	-1.441	0.208	EE_lowSignal	L3_lowSignal	YA_H3K27me3Repressed
chrI	3678633	3678821	peak1047	-0.053	0.791	0.065	0.848	EE_repressedEnhancer	L3_lowSignal	YA_lowSignal
chrI	3680248	3681086	peak1048	-0.732	0.0548	-0.211	0.875	NA	L3_promoterTSS	NA
chrI	3682902	3683151	peak1049	1.449	0.00526	-0.251	0.851	EE_activeEnhancer	L3_activeEnhancer	YA_activeEnhancer
chrI	3683426	3683614	peak1050	0.621	0.413	-0.591	0.744	EE_transcribedGeneBody	L3_transcribedGeneBody	YA_promoterTSS
chrI	3684082	3684766	peak1051	-0.191	0.628	-0.134	0.931	EE_promoterTSS	L3_promoterTSS	YA_promoterTSS
chrI	3693455	3693728	peak1052	0.729	0.0612	-0.847	0.385	EE_lowSignal	L3_lowSignal	YA_lowSignal
chrI	3706453	3706771	peak1053	0.274	0.535	-0.781	0.504	EE_repressedEnhancer	L3_lowSignal	YA_repressedEnhancer
chrI	3708142	3708620	peak1054	1.463	0.000767	-0.83	0.49	EE_repressedEnhancer	L3_lowSignal	YA_lowSignal
chrI	3709310	3709390	peak1055	0.473	0.919	-0.249	0.888	EE_repressedEnhancer	L3_lowSignal	YA_repressedEnhancer
chrI	3709887	3710183	peak1056	0.063	0.967	0.002	0.929	EE_repressedEnhancer	L3_repressedEnhancer	YA_repressedEnhancer
chrI	3711826	3712109	peak1057	0.3	0.703	0.7	0.609	EE_lowSignal	L3_lowSignal	YA_lowSignal
chrI	3713630	3713772	peak1058	-0.038	0.942	-0.169	0.984	EE_repressedEnhancer	L3_transcribedGeneBody	YA_transcribedGeneBody
chrI	3718998	3719191	peak1059	-0.053	0.964	0.37	0.844	EE_transcribedGeneBody	L3_transcribedGeneBody	YA_promoterTSS
chrI	3721232	3722138	peak1060	-2.326	7.24e-11	0.644	0.52	EE_activeEnhancer	NA	YA_activeEnhancer
chrI	3723413	3723799	peak1061	-2.442	3.14e-11	0.601	0.589	EE_repressedEnhancer	L3_transcribedGeneBody	YA_activeEnhancer
chrI	3724736	3725005	peak1062	-1.019	0.0084	0.56	0.598	EE_activeEnhancer	L3_activeEnhancer	YA_activeEnhancer
chrI	3734743	3734828	peak1063	-0.255	0.727	-0.483	0.792	EE_transcribedGeneBody	L3_transcribedGeneBody	YA_transcribedGeneBody
chrI	3735020	3735182	peak1064	0.572	0.393	-0.688	0.638	EE_transcribedGeneBody	L3_transcribedGeneBody	YA_transcribedGeneBody
chrI	3735693	3735899	peak1065	0.22	0.6	-0.363	0.738	EE_transcribedGeneBody	L3_transcribedGeneBody	YA_transcribedGeneBody
chrI	3738089	3738720	peak1066	-0.976	0.0087	0.285	0.821	EE_activeEnhancer	L3_activeEnhancer	YA_activeEnhancer
chrI	3739272	3739603	peak1067	0.211	0.679	0.85	0.38	EE_promoterTSS	L3_activeEnhancer	YA_activeEnhancer
chrI	3740166	3740958	peak1068	-1.834	2.72e-07	0.379	0.738	EE_promoterTSS	L3_promoterTSS	YA_activeEnhancer
chrI	3740722	3740966	peak1069	-1.834	2.72e-07	0.379	0.738	EE_promoterTSS	L3_promoterTSS	YA_promoterTSS
chrI	3748574	3748759	peak1070	1.591	0.02	0.856	0.364	EE_repressedEnhancer	L3_lowSignal	YA_heterochromatin
chrI	3749045	3749552	peak1071	0.625	0.146	0.574	0.583	EE_repressedEnhancer	L3_lowSignal	YA_repressedEnhancer
chrI	3751759	3751978	peak1072	0.208	0.793	-0.013	0.931	EE_repressedEnhancer	L3_transcribedGeneBody	YA_heterochromatin
chrI	3752750	3752910	peak1073	-0.352	0.377	0.018	0.995	EE_lowSignal	L3_lowSignal	YA_heterochromatin
chrI	3753210	3754807	peak1074	-0.57	0.141	0.148	0.906	NA	L3_lowSignal	NA
chrI	3757549	3757699	peak1075	-0.102	0.94	0.803	0.702	EE_lowSignal	L3_transcribedGeneBody	YA_heterochromatin
chrI	3757864	3758102	peak1076	-0.438	0.424	0.14	0.841	EE_lowSignal	L3_transcribedGeneBody	YA_H3K27me3Repressed
chrI	3758827	3759501	peak1077	-1.496	3.63e-05	0.631	0.539	EE_repressedEnhancer	L3_lowSignal	NA
chrI	3781476	3781984	peak1078	-1.332	0.000272	0.274	0.846	EE_promoterTSS	L3_promoterTSS	YA_activeEnhancer
chrI	3782448	3782928	peak1079	-0.246	0.609	-0.519	0.644	EE_transcribedGeneBody	L3_transcribedGeneBody	YA_promoterTSS
chrI	3785129	3785694	peak1080	-1.913	1.24e-07	0.977	0.295	EE_transcribedGeneBody	L3_activeEnhancer	YA_activeEnhancer
chrI	3785920	3786379	peak1081	-1.785	1.13e-06	1.119	0.239	EE_transcribedGeneBody	L3_promoterTSS	YA_activeEnhancer
chrI	3787665	3787904	peak1082	-1.431	0.00014	0.278	0.855	EE_promoterTSS	L3_promoterTSS	YA_promoterTSS
chrI	3788069	3788492	peak1083	-0.34	0.459	-0.402	0.724	EE_promoterTSS	L3_promoterTSS	YA_promoterTSS
chrI	3789384	3789563	peak1084	-0.417	0.408	-0.503	0.652	EE_transcribedGeneBody	L3_transcribedGeneBody	YA_transcribedGeneBody
chrI	3793427	3793685	peak1085	-1.125	0.00711	1.014	0.314	EE_activeEnhancer	L3_repressedEnhancer	YA_activeEnhancer
chrI	3805592	3805863	peak1086	-0.565	0.108	-0.321	0.806	EE_promoterTSS	L3_promoterTSS	YA_activeEnhancer
chrI	3806004	3806226	peak1087	-0.1	0.606	-1.864	0.0213	EE_promoterTSS	L3_promoterTSS	YA_activeEnhancer
chrI	3806426	3807021	peak1088	-2.002	2.7e-08	0.609	0.556	EE_activeEnhancer	L3_promoterTSS	YA_activeEnhancer
chrI	3807533	3807702	peak1089	-0.463	0.0758	0.75	0.537	EE_transcribedGeneBody	L3_activeEnhancer	YA_repressedEnhancer
chrI	3807897	3808095	peak1090	0.219	0.762	-0.09	0.859	EE_transcribedGeneBody	L3_transcribedGeneBody	YA_transcribedGeneBody
chrI	3809689	3810074	peak1091	0.537	0.244	-0.88	0.421	EE_transcribedGeneBody	L3_transcribedGeneBody	YA_transcribedGeneBody
chrI	3810935	3811146	peak1092	0.628	0.16	-0.865	0.393	EE_transcribedGeneBody	L3_transcribedGeneBody	YA_transcribedGeneBody
chrI	3816641	3817161	peak1093	-0.256	0.56	0.614	0.58	EE_promoterTSS	L3_promoterTSS	YA_promoterTSS
chrI	3817834	3817989	peak1094	-1.025	0.00904	0.746	0.534	EE_promoterTSS	L3_promoterTSS	YA_promoterTSS
chrI	3818229	3818365	peak1095	-0.606	0.17	0.095	0.931	EE_promoterTSS	L3_promoterTSS	YA_promoterTSS
chrI	3818693	3819917	peak1096	-0.833	0.0292	-0.48	0.655	EE_transcribedGeneBody	L3_transcribedGeneBody	YA_transcribedGeneBody
chrI	3822330	3823014	peak1097	-2.225	6.35e-10	0.745	0.451	EE_transcribedGeneBody	L3_activeEnhancer	YA_activeEnhancer
chrI	3823511	3823738	peak1098	-1.183	0.00191	0.355	0.75	EE_transcribedGeneBody	L3_promoterTSS	YA_activeEnhancer
chrI	3824074	3824642	peak1099	-1.366	0.000157	0.224	0.859	EE_activeEnhancer	L3_activeEnhancer	YA_promoterTSS
chrI	3824702	3824916	peak1100	-1.456	0.000147	0.162	0.893	EE_promoterTSS	L3_promoterTSS	YA_promoterTSS
chrI	3829370	3829520	peak1101	-0.496	0.102	-0.721	0.604	EE_promoterTSS	L3_promoterTSS	YA_activeEnhancer
chrI	3829654	3830031	peak1102	-1.906	2.32e-07	0.324	0.837	EE_promoterTSS	L3_promoterTSS	YA_promoterTSS
chrI	3831090	3831284	peak1103	-0.568	0.299	-0.24	0.852	EE_transcribedGeneBody	L3_promoterTSS	YA_promoterTSS
chrI	3832204	3832709	peak1104	0.197	0.774	-0.49	0.655	EE_transcribedGeneBody	L3_transcribedGeneBody	YA_promoterTSS
chrI	3837709	3837941	peak1105	-0.806	0.0425	1.054	0.311	EE_repressedEnhancer	L3_lowSignal	YA_lowSignal
chrI	3838643	3839062	peak1106	0.04	0.88	-0.613	0.62	EE_repressedEnhancer	L3_lowSignal	YA_heterochromatin
chrI	3841543	3841764	peak1107	-0.091	0.387	-0.767	0.791	EE_promoterTSS	L3_transcribedGeneBody	YA_lowSignal
chrI	3842265	3842872	peak1108	0.191	0.694	0.499	0.648	EE_activeEnhancer	L3_repressedEnhancer	YA_activeEnhancer
chrI	3842987	3843213	peak1109	0.956	0.0367	0.631	0.739	EE_activeEnhancer	L3_repressedEnhancer	NA
chrI	3845805	3846278	peak1110	1.138	0.00343	0.723	0.539	EE_activeEnhancer	L3_repressedEnhancer	YA_H3K27me3Repressed
chrI	3852570	3852720	peak1111	-0.467	0.562	1.145	0.5	EE_repressedEnhancer	L3_H3K27me3Repressed	YA_lowSignal
chrI	3861447	3862184	peak1112	-0.878	0.0194	0.151	0.898	EE_promoterTSS	L3_promoterTSS	YA_activeEnhancer
chrI	3862515	3862659	peak1113	0.045	0.871	-0.042	0.945	EE_promoterTSS	L3_activeEnhancer	YA_activeEnhancer
chrI	3865970	3866267	peak1114	-0.384	0.348	0.531	0.652	EE_promoterTSS	L3_promoterTSS	YA_promoterTSS
chrI	3867235	3867533	peak1115	-0.667	0.0459	0.782	0.54	EE_promoterTSS	L3_promoterTSS	YA_promoterTSS
chrI	3867967	3868281	peak1116	-0.153	0.749	-0.449	0.714	EE_transcribedGeneBody	L3_transcribedGeneBody	YA_promoterTSS
chrI	3868623	3868900	peak1117	-0.419	0.458	-0.794	0.453	EE_transcribedGeneBody	L3_transcribedGeneBody	YA_transcribedGeneBody
chrI	3873216	3873553	peak1118	-0.814	0.0597	0.46	0.712	EE_lowSignal	L3_lowSignal	YA_repressedEnhancer
chrI	3873859	3874095	peak1119	-0.767	0.0365	0.168	0.952	EE_activeEnhancer	L3_lowSignal	YA_promoterTSS
chrI	3874403	3874685	peak1120	0.239	0.665	-1.245	0.207	EE_promoterTSS	L3_transcribedGeneBody	YA_promoterTSS
chrI	3875238	3875493	peak1121	0.003	0.987	-0.771	0.496	EE_transcribedGeneBody	L3_transcribedGeneBody	YA_transcribedGeneBody
chrI	3876835	3877022	peak1122	-0.882	0.0262	0.652	0.62	EE_promoterTSS	L3_promoterTSS	YA_promoterTSS
chrI	3877384	3877700	peak1123	0.842	0.091	-1.298	0.226	EE_promoterTSS	L3_transcribedGeneBody	YA_transcribedGeneBody
chrI	3880269	3880612	peak1124	0.348	0.409	-0.336	0.657	EE_transcribedGeneBody	L3_transcribedGeneBody	YA_transcribedGeneBody
chrI	3883499	3883664	peak1125	-0.025	0.954	-0.465	0.826	EE_transcribedGeneBody	L3_transcribedGeneBody	YA_transcribedGeneBody
chrI	3883860	3884136	peak1126	-0.235	0.585	-0.498	0.7	EE_transcribedGeneBody	L3_transcribedGeneBody	YA_transcribedGeneBody
chrI	3885673	3885842	peak1127	1.913	0.00567	-1.929	0.188	EE_transcribedGeneBody	L3_transcribedGeneBody	YA_transcribedGeneBody
chrI	3889087	3889338	peak1128	0.473	0.46	-0.245	0.846	EE_repressedEnhancer	L3_lowSignal	YA_H3K27me3Repressed
chrI	3891438	3891980	peak1129	-0.706	0.0699	0.62	0.569	EE_repressedEnhancer	L3_lowSignal	YA_lowSignal
chrI	3898217	3898628	peak1130	-0.543	0.168	0.999	0.263	EE_repressedEnhancer	L3_promoterTSS	YA_lowSignal
chrI	3898556	3899198	peak1131	-0.543	0.168	0.999	0.263	EE_transcribedGeneBody	L3_promoterTSS	YA_lowSignal
chrI	3899060	3899690	peak1132	-0.543	0.168	0.999	0.263	NA	L3_promoterTSS	YA_lowSignal
chrI	3899655	3900109	peak1133	-0.543	0.168	0.999	0.263	EE_activeEnhancer	NA	YA_lowSignal
chrI	3901502	3901722	peak1134	1.471	0.00297	0.148	0.999	EE_repressedEnhancer	L3_repressedEnhancer	NA
chrI	3906224	3906687	peak1135	-1.654	7.48e-06	1.147	0.229	EE_lowSignal	L3_activeEnhancer	YA_lowSignal
chrI	3907855	3908273	peak1136	0.701	0.134	-0.406	0.805	EE_repressedEnhancer	L3_repressedEnhancer	YA_activeEnhancer
chrI	3908500	3908676	peak1137	-0.46	0.102	0.433	0.778	EE_promoterTSS	L3_lowSignal	YA_promoterTSS
chrI	3908845	3909248	peak1138	-0.092	0.897	-0.31	0.803	EE_promoterTSS	L3_transcribedGeneBody	YA_promoterTSS
chrI	3910603	3910777	peak1139	0.381	0.943	-0.304	0.919	EE_promoterTSS	L3_lowSignal	YA_lowSignal
chrI	3914424	3914560	peak1140	0.58	0.176	0.416	0.657	EE_lowSignal	L3_lowSignal	YA_heterochromatin
chrI	3915695	3915908	peak1141	1.182	0.035	0.891	0.372	EE_repressedEnhancer	L3_lowSignal	YA_heterochromatin
chrI	3916688	3916946	peak1142	-1.235	0.00194	2.199	0.00694	EE_repressedEnhancer	L3_lowSignal	YA_H3K27me3Repressed
chrI	3918189	3918626	peak1143	0.02	0.911	-0.763	0.497	EE_lowSignal	L3_lowSignal	YA_H3K27me3Repressed
chrI	3920798	3921149	peak1144	-0.176	0.776	-0.944	0.442	EE_transcribedGeneBody	L3_transcribedGeneBody	YA_transcribedGeneBody
chrI	3928219	3928384	peak1145	-0.394	0.344	0.119	0.933	EE_activeEnhancer	L3_transcribedGeneBody	YA_activeEnhancer
chrI	3929431	3929722	peak1146	2.461	1.09e-05	-0.941	0.521	EE_promoterTSS	L3_transcribedGeneBody	YA_transcribedGeneBody
chrI	3930504	3930701	peak1147	-0.776	0.0446	-0.132	0.984	EE_promoterTSS	L3_activeEnhancer	YA_activeEnhancer
chrI	3931823	3932071	peak1148	-0.076	0.91	-1.953	0.0108	EE_transcribedGeneBody	L3_lowSignal	NA
chrI	3936980	3937783	peak1149	0.344	0.43	-0.486	0.654	EE_H3K27me3Repressed	L3_transcribedGeneBody	YA_transcribedGeneBody
chrI	3939484	3939826	peak1150	0.736	0.114	-0.038	0.934	EE_H3K27me3Repressed	L3_transcribedGeneBody	YA_transcribedGeneBody
chrI	3940302	3940480	peak1151	0.465	0.447	-0.336	0.871	EE_H3K27me3Repressed	L3_transcribedGeneBody	YA_lowSignal
chrI	3940669	3941123	peak1152	0.129	0.725	-0.296	0.809	EE_H3K27me3Repressed	L3_transcribedGeneBody	YA_transcribedGeneBody
chrI	3941610	3941838	peak1153	-0.113	0.938	0.423	0.766	EE_H3K27me3Repressed	L3_transcribedGeneBody	YA_transcribedGeneBody
chrI	3942526	3942772	peak1154	0.463	0.342	-0.226	0.906	EE_H3K27me3Repressed	L3_transcribedGeneBody	YA_transcribedGeneBody
chrI	3943423	3943628	peak1155	0.825	0.0565	0.018	0.876	EE_H3K27me3Repressed	L3_transcribedGeneBody	YA_transcribedGeneBody
chrI	3949084	3949239	peak1156	0.926	0.142	-0.881	0.597	EE_H3K27me3Repressed	L3_transcribedGeneBody	YA_transcribedGeneBody
chrI	3949397	3949564	peak1157	-0.125	0.903	0.333	0.87	EE_H3K27me3Repressed	L3_transcribedGeneBody	YA_transcribedGeneBody
chrI	3949773	3949953	peak1158	0.41	0.404	-0.087	0.985	EE_H3K27me3Repressed	L3_transcribedGeneBody	YA_transcribedGeneBody
chrI	3953281	3953441	peak1159	0.97	0.0581	-0.408	0.89	EE_transcribedGeneBody	L3_transcribedGeneBody	YA_transcribedGeneBody
chrI	3953820	3954042	peak1160	-0.023	0.984	0.279	0.888	EE_transcribedGeneBody	L3_transcribedGeneBody	YA_activeEnhancer
chrI	3956580	3957038	peak1161	-0.444	0.257	0.573	0.586	EE_activeEnhancer	L3_activeEnhancer	YA_activeEnhancer
chrI	3958508	3958671	peak1162	0.694	0.425	0.969	0.416	EE_activeEnhancer	L3_activeEnhancer	YA_lowSignal
chrI	3959486	3960072	peak1163	1.736	6.93e-06	0.378	0.775	EE_activeEnhancer	L3_repressedEnhancer	YA_repressedEnhancer
chrI	3960191	3960605	peak1164	1.662	2.96e-05	-0.304	0.903	EE_activeEnhancer	L3_lowSignal	YA_lowSignal
chrI	3976119	3976512	peak1165	-0.417	0.226	0.062	0.982	EE_H3K27me3Repressed	L3_lowSignal	YA_H3K27me3Repressed
chrI	3977998	3978321	peak1166	0.495	0.309	-0.305	0.891	EE_repressedEnhancer	L3_lowSignal	YA_heterochromatin
chrI	3982847	3983048	peak1167	-0.928	0.00708	-0.555	0.72	EE_promoterTSS	L3_promoterTSS	YA_promoterTSS
chrI	3983141	3983374	peak1168	0.969	0.0815	-1.621	0.141	EE_promoterTSS	L3_promoterTSS	YA_promoterTSS
chrI	3984104	3984438	peak1169	-0.081	0.918	-0.71	0.505	EE_transcribedGeneBody	L3_transcribedGeneBody	YA_transcribedGeneBody
chrI	3984478	3984850	peak1170	-0.387	0.392	-0.666	0.589	EE_transcribedGeneBody	L3_transcribedGeneBody	YA_transcribedGeneBody
chrI	3985031	3985341	peak1171	-0.004	0.969	-1.148	0.232	EE_transcribedGeneBody	L3_transcribedGeneBody	YA_transcribedGeneBody
chrI	3985737	3986134	peak1172	-0.081	0.874	-0.691	0.506	EE_transcribedGeneBody	L3_transcribedGeneBody	YA_transcribedGeneBody
chrI	3987676	3988016	peak1173	-0.809	0.0406	0.071	0.98	EE_repressedEnhancer	L3_lowSignal	YA_H3K27me3Repressed
chrI	3988734	3988894	peak1174	-1.355	0.00225	1.015	0.502	EE_H3K27me3Repressed	L3_lowSignal	YA_heterochromatin
chrI	3992707	3992887	peak1175	2.222	7.24e-07	0.143	0.944	EE_activeEnhancer	L3_activeEnhancer	YA_activeEnhancer
chrI	3993491	3993927	peak1176	1.345	0.000565	0.267	0.846	EE_promoterTSS	L3_transcribedGeneBody	YA_activeEnhancer
chrI	3994423	3994965	peak1177	0.4	0.321	0.495	0.654	EE_promoterTSS	L3_transcribedGeneBody	YA_activeEnhancer
chrI	3995749	3996367	peak1178	0.459	0.25	-0.227	0.876	EE_promoterTSS	L3_transcribedGeneBody	YA_transcribedGeneBody
chrI	4001830	4002103	peak1179	0.636	0.15	0.286	0.857	EE_repressedEnhancer	L3_transcribedGeneBody	YA_lowSignal
chrI	4003667	4003839	peak1180	-0.121	0.974	-0.329	0.748	EE_H3K27me3Repressed	L3_transcribedGeneBody	YA_transcribedGeneBody
chrI	4005306	4006078	peak1181	-3.327	2.39e-19	0.834	0.376	EE_H3K27me3Repressed	L3_transcribedGeneBody	YA_activeEnhancer
chrI	4006916	4007316	peak1182	-1.755	2.11e-06	0.887	0.366	EE_H3K27me3Repressed	L3_promoterTSS	YA_activeEnhancer
chrI	4008156	4008959	peak1183	-1.657	4.2e-06	0.25	0.84	EE_lowSignal	L3_activeEnhancer	YA_activeEnhancer
chrI	4011448	4011632	peak1184	-0.148	0.865	0.245	0.914	EE_H3K27me3Repressed	L3_transcribedGeneBody	YA_activeEnhancer
chrI	4012334	4012489	peak1185	-0.803	0.0314	-0.022	0.965	EE_lowSignal	L3_activeEnhancer	YA_activeEnhancer
chrI	4012682	4013175	peak1186	-1.605	1.38e-05	0.407	0.707	EE_lowSignal	L3_activeEnhancer	YA_activeEnhancer
chrI	4017294	4017545	peak1187	-0.411	0.342	0.362	0.859	EE_transcribedGeneBody	L3_transcribedGeneBody	YA_activeEnhancer
chrI	4018334	4019277	peak1188	-0.852	0.0243	0.737	0.464	EE_transcribedGeneBody	L3_transcribedGeneBody	YA_activeEnhancer
chrI	4019797	4019984	peak1189	-0.522	0.345	0.407	0.759	EE_transcribedGeneBody	L3_transcribedGeneBody	YA_lowSignal
chrI	4020280	4021013	peak1190	-0.94	0.0124	0.423	0.7	EE_transcribedGeneBody	L3_transcribedGeneBody	YA_repressedEnhancer
chrI	4021062	4021458	peak1191	-0.136	0.725	0.311	0.787	EE_transcribedGeneBody	L3_transcribedGeneBody	YA_transcribedGeneBody
chrI	4024321	4024534	peak1192	0.03	0.83	-0.509	0.694	EE_transcribedGeneBody	L3_transcribedGeneBody	YA_transcribedGeneBody
chrI	4025152	4025661	peak1193	0.448	0.315	0.157	0.949	EE_transcribedGeneBody	L3_transcribedGeneBody	YA_transcribedGeneBody
chrI	4029343	4029916	peak1194	-0.854	0.0243	0.638	0.559	EE_transcribedGeneBody	L3_activeEnhancer	YA_activeEnhancer
chrI	4030405	4030851	peak1195	-0.898	0.015	0.995	0.326	EE_transcribedGeneBody	L3_activeEnhancer	NA
chrI	4032452	4032991	peak1196	-0.831	0.0271	0.856	0.361	EE_activeEnhancer	L3_transcribedGeneBody	YA_lowSignal
chrI	4033496	4033721	peak1197	1.563	0.000495	-0.505	0.895	EE_activeEnhancer	L3_lowSignal	YA_lowSignal
chrI	4034021	4034254	peak1198	1.953	1.04e-05	-0.99	0.508	EE_activeEnhancer	L3_lowSignal	YA_lowSignal
chrI	4035347	4035938	peak1199	-1.488	4.17e-05	0.974	0.281	EE_repressedEnhancer	L3_lowSignal	YA_H3K27me3Repressed
chrI	4035714	4035938	peak1200	-1.488	4.17e-05	0.974	0.281	EE_repressedEnhancer	L3_lowSignal	YA_H3K27me3Repressed
chrI	4040907	4041241	peak1201	1.731	3.51e-05	-0.523	0.794	EE_repressedEnhancer	L3_lowSignal	YA_H3K27me3Repressed
chrI	4046109	4047253	peak1202	-0.987	0.00734	0.814	0.394	EE_repressedEnhancer	L3_lowSignal	YA_H3K27me3Repressed
chrI	4047367	4047538	peak1203	-0.224	0.681	0.418	0.75	EE_lowSignal	L3_lowSignal	YA_heterochromatin
chrI	4050157	4050314	peak1204	-0.011	0.962	1.039	0.349	EE_H3K27me3Repressed	L3_lowSignal	YA_H3K27me3Repressed
chrI	4050530	4050848	peak1205	-1.1	0.00471	1.379	0.13	EE_repressedEnhancer	L3_lowSignal	YA_H3K27me3Repressed
chrI	4055489	4055888	peak1206	0.423	0.309	-0.085	0.846	EE_H3K27me3Repressed	L3_lowSignal	YA_heterochromatin
chrI	4058782	4058967	peak1207	0.817	0.113	-0.635	0.634	EE_lowSignal	L3_lowSignal	YA_heterochromatin
chrI	4059368	4059817	peak1208	-0.55	0.231	-0.041	0.978	EE_H3K27me3Repressed	L3_lowSignal	YA_heterochromatin
chrI	4060718	4060990	peak1209	-0.269	0.694	-0.126	0.911	EE_H3K27me3Repressed	L3_lowSignal	YA_heterochromatin
chrI	4061665	4061939	peak1210	-0.282	0.69	0.241	0.942	EE_H3K27me3Repressed	L3_lowSignal	YA_heterochromatin
chrI	4062374	4062586	peak1211	-0.312	0.658	0.338	0.841	EE_H3K27me3Repressed	L3_lowSignal	YA_heterochromatin
chrI	4064748	4064929	peak1212	-0.59	0.217	0.247	0.837	EE_H3K27me3Repressed	L3_lowSignal	YA_heterochromatin
chrI	4068457	4068981	peak1213	-0.448	0.33	-0.149	0.913	EE_H3K27me3Repressed	L3_lowSignal	YA_heterochromatin
chrI	4069744	4069931	peak1214	-0.426	0.443	-0.368	0.809	EE_H3K27me3Repressed	L3_H3K27me3Repressed	YA_heterochromatin
chrI	4070776	4070941	peak1215	-1.082	0.0245	1.582	0.188	EE_H3K27me3Repressed	L3_lowSignal	YA_heterochromatin
chrI	4073724	4073960	peak1216	-0.974	0.0119	0.509	0.725	EE_H3K27me3Repressed	L3_repressedEnhancer	YA_repressedEnhancer
chrI	4075232	4075429	peak1217	0.132	0.994	0.04	0.86	EE_H3K27me3Repressed	L3_lowSignal	YA_heterochromatin
chrI	4075737	4076583	peak1218	-0.578	0.176	0.297	0.821	EE_H3K27me3Repressed	L3_lowSignal	YA_heterochromatin
chrI	4078739	4078976	peak1219	0.433	0.261	-0.455	0.797	EE_repressedEnhancer	L3_lowSignal	YA_H3K27me3Repressed
chrI	4081001	4081689	peak1220	-1.268	0.000594	0.936	0.356	EE_lowSignal	L3_lowSignal	YA_heterochromatin
chrI	4082722	4082992	peak1221	-1.121	0.00522	0.801	0.4	EE_lowSignal	L3_lowSignal	YA_heterochromatin
chrI	4085077	4085554	peak1222	-0.007	0.989	0.808	0.501	EE_repressedEnhancer	L3_lowSignal	YA_H3K27me3Repressed
chrI	4085804	4086006	peak1223	0.458	0.254	0.849	0.65	EE_lowSignal	L3_lowSignal	YA_heterochromatin
chrI	4086184	4086375	peak1224	1.042	0.0931	-0.73	0.692	EE_H3K27me3Repressed	L3_H3K27me3Repressed	YA_H3K27me3Repressed
chrI	4086686	4086928	peak1225	0.132	0.707	0.738	0.711	EE_H3K27me3Repressed	L3_lowSignal	YA_heterochromatin
chrI	4088314	4088416	peak1226	-0.463	0.471	0.482	0.893	EE_H3K27me3Repressed	L3_lowSignal	YA_heterochromatin
chrI	4094661	4094811	peak1227	0.604	0.225	-0.114	0.93	EE_lowSignal	L3_H3K27me3Repressed	YA_H3K27me3Repressed
chrI	4096643	4096793	peak1228	0.267	0.304	0.746	0.822	EE_lowSignal	L3_lowSignal	YA_lowSignal
chrI	4125313	4125473	peak1229	0.776	0.119	0.345	0.921	EE_lowSignal	L3_lowSignal	YA_heterochromatin
chrI	4125959	4126177	peak1230	1.393	0.00114	-1.218	0.253	EE_repressedEnhancer	NA	YA_H3K27me3Repressed
chrI	4126764	4127195	peak1231	1.716	0.000145	-1.506	0.14	EE_repressedEnhancer	L3_H3K27me3Repressed	YA_H3K27me3Repressed
chrI	4132225	4132408	peak1232	-0.482	0.228	0.078	0.983	EE_promoterTSS	L3_promoterTSS	YA_promoterTSS
chrI	4132854	4133027	peak1233	0.045	0.996	-0.073	0.915	EE_promoterTSS	L3_transcribedGeneBody	YA_transcribedGeneBody
chrI	4134694	4134891	peak1234	1.402	0.0317	-0.739	0.598	EE_transcribedGeneBody	L3_transcribedGeneBody	YA_transcribedGeneBody
chrI	4137218	4137387	peak1235	1.049	0.0432	-0.856	0.512	EE_promoterTSS	L3_transcribedGeneBody	YA_transcribedGeneBody
chrI	4139082	4139590	peak1236	-1.135	0.00216	0.001	0.999	EE_promoterTSS	L3_promoterTSS	YA_promoterTSS
chrI	4140202	4140980	peak1237	-0.933	0.0116	0.347	0.763	EE_promoterTSS	L3_promoterTSS	YA_promoterTSS
chrI	4151152	4151341	peak1238	1.519	0.00425	0.981	0.463	EE_lowSignal	L3_lowSignal	YA_heterochromatin
chrI	4151563	4151729	peak1239	0.948	0.135	-0.586	0.71	EE_lowSignal	L3_lowSignal	YA_H3K27me3Repressed
chrI	4154059	4154388	peak1240	-0.309	0.362	0.916	0.481	EE_H3K27me3Repressed	L3_H3K27me3Repressed	YA_H3K27me3Repressed
chrI	4158049	4158416	peak1241	0.044	0.983	0.184	0.858	EE_repressedEnhancer	L3_lowSignal	YA_repressedEnhancer
chrI	4158657	4158836	peak1242	2.239	8.09e-05	-0.177	0.965	EE_activeEnhancer	L3_lowSignal	YA_lowSignal
chrI	4161120	4161395	peak1243	-1.796	3.3e-06	0.28	0.848	EE_lowSignal	L3_lowSignal	YA_heterochromatin
chrI	4164345	4164635	peak1244	0.266	0.514	-0.464	0.78	EE_lowSignal	L3_lowSignal	YA_H3K27me3Repressed
chrI	4171773	4172480	peak1245	-1.333	0.000207	-0.273	0.822	NA	L3_lowSignal	YA_promoterTSS
chrI	4173076	4173539	peak1246	-0.196	0.627	-0.867	0.398	EE_transcribedGeneBody	L3_promoterTSS	YA_promoterTSS
chrI	4175818	4176090	peak1247	-0.684	0.0913	0.93	0.37	EE_transcribedGeneBody	L3_promoterTSS	YA_promoterTSS
chrI	4177448	4177684	peak1248	-0.211	0.711	-0.493	0.715	EE_transcribedGeneBody	L3_transcribedGeneBody	YA_promoterTSS
chrI	4178467	4178896	peak1249	-1.104	0.00324	-0.05	0.955	EE_promoterTSS	L3_promoterTSS	YA_promoterTSS
chrI	4183604	4184922	peak1250	-0.371	0.382	-0.651	0.524	EE_transcribedGeneBody	L3_transcribedGeneBody	YA_transcribedGeneBody
chrI	4185900	4186704	peak1251	-0.486	0.173	-0.975	0.301	EE_transcribedGeneBody	L3_promoterTSS	YA_promoterTSS
chrI	4198092	4198901	peak1252	1.319	0.000472	-0.027	0.99	EE_activeEnhancer	L3_lowSignal	YA_transcribedGeneBody
chrI	4199121	4199491	peak1253	0.253	0.588	0.54	0.544	EE_promoterTSS	L3_lowSignal	YA_transcribedGeneBody
chrI	4199698	4200264	peak1254	-0.502	0.213	0.849	0.381	EE_promoterTSS	NA	YA_transcribedGeneBody
chrI	4201435	4202003	peak1255	0.343	0.45	0.669	0.504	EE_activeEnhancer	L3_transcribedGeneBody	YA_activeEnhancer
chrI	4210721	4210904	peak1256	0.29	0.743	0.1	0.913	EE_promoterTSS	L3_promoterTSS	YA_promoterTSS
chrI	4211553	4211769	peak1257	0.428	0.416	-0.723	0.637	EE_transcribedGeneBody	L3_transcribedGeneBody	YA_transcribedGeneBody
chrI	4213485	4214058	peak1258	0.825	0.0609	-0.366	0.674	EE_transcribedGeneBody	L3_transcribedGeneBody	YA_transcribedGeneBody
chrI	4215703	4215909	peak1259	-0.634	0.0426	0.06	0.984	EE_promoterTSS	NA	YA_lowSignal
chrI	4217924	4218215	peak1260	-0.294	0.542	0.089	0.934	EE_lowSignal	L3_lowSignal	YA_lowSignal
chrI	4218226	4218875	peak1261	-0.902	0.015	0.116	0.918	EE_lowSignal	L3_activeEnhancer	YA_repressedEnhancer
chrI	4219661	4220157	peak1262	0.3	0.6	0.029	0.934	EE_repressedEnhancer	L3_repressedEnhancer	YA_activeEnhancer
chrI	4224590	4225241	peak1263	-0.676	0.0816	1.052	0.262	NA	L3_transcribedGeneBody	YA_activeEnhancer
chrI	4230656	4231078	peak1264	0.3	0.517	-0.476	0.735	EE_lowSignal	L3_transcribedGeneBody	YA_lowSignal
chrI	4234557	4234901	peak1265	0.777	0.0798	-0.865	0.476	EE_H3K27me3Repressed	L3_transcribedGeneBody	YA_transcribedGeneBody
chrI	4248775	4248981	peak1266	0.491	0.235	-0.382	0.72	EE_transcribedGeneBody	L3_transcribedGeneBody	YA_transcribedGeneBody
chrI	4250773	4251009	peak1267	0.63	0.226	-1.248	0.321	EE_transcribedGeneBody	L3_transcribedGeneBody	YA_transcribedGeneBody
chrI	4253295	4253506	peak1268	0.072	0.985	-0.098	0.965	EE_promoterTSS	L3_transcribedGeneBody	YA_promoterTSS
chrI	4253678	4254527	peak1269	-1.606	7.05e-06	0.491	0.646	EE_promoterTSS	L3_promoterTSS	YA_promoterTSS
chrI	4255364	4255614	peak1270	0.469	0.315	-0.15	0.978	EE_promoterTSS	L3_transcribedGeneBody	YA_promoterTSS
chrI	4256370	4256544	peak1271	0.194	0.518	0.205	0.934	EE_transcribedGeneBody	L3_transcribedGeneBody	YA_transcribedGeneBody
chrI	4256860	4257050	peak1272	0.86	0.02	-1.188	0.247	EE_transcribedGeneBody	L3_transcribedGeneBody	YA_transcribedGeneBody
chrI	4270765	4271167	peak1273	0.284	0.493	-0.389	0.658	EE_promoterTSS	L3_promoterTSS	YA_promoterTSS
chrI	4274898	4275544	peak1274	0.515	0.249	-0.337	0.801	EE_lowSignal	L3_lowSignal	YA_heterochromatin
chrI	4297700	4298023	peak1275	-2.035	1.05e-08	0.73	0.45	EE_activeEnhancer	L3_activeEnhancer	YA_lowSignal
chrI	4297761	4298696	peak1276	-2.035	1.05e-08	0.73	0.45	EE_activeEnhancer	NA	YA_activeEnhancer
chrI	4299198	4299348	peak1277	-1.17	0.00132	0.273	0.868	EE_promoterTSS	L3_activeEnhancer	YA_activeEnhancer
chrI	4299515	4299844	peak1278	0.022	0.87	0.15	0.929	EE_promoterTSS	L3_activeEnhancer	YA_activeEnhancer
chrI	4303770	4304318	peak1279	-0.998	0.00824	1.527	0.0821	EE_activeEnhancer	L3_transcribedGeneBody	YA_transcribedGeneBody
chrI	4305419	4305616	peak1280	0.292	0.68	0.179	0.999	EE_transcribedGeneBody	L3_transcribedGeneBody	YA_transcribedGeneBody
chrI	4306543	4306773	peak1281	-0.045	0.898	0.747	0.68	EE_transcribedGeneBody	L3_transcribedGeneBody	YA_transcribedGeneBody
chrI	4308218	4308488	peak1282	0.754	0.232	0.735	0.631	EE_activeEnhancer	L3_transcribedGeneBody	YA_transcribedGeneBody
chrI	4308984	4309176	peak1283	0.578	0.328	0.393	0.898	EE_lowSignal	L3_lowSignal	YA_lowSignal
chrI	4309692	4310004	peak1284	0.126	0.777	0.605	0.57	EE_activeEnhancer	L3_lowSignal	YA_repressedEnhancer
chrI	4311524	4311927	peak1285	-1.519	2.97e-05	0.643	0.543	EE_transcribedGeneBody	L3_activeEnhancer	YA_repressedEnhancer
chrI	4312711	4313051	peak1286	0.801	0.128	0.263	0.89	EE_activeEnhancer	L3_transcribedGeneBody	YA_repressedEnhancer
chrI	4313638	4313842	peak1287	-0.338	0.36	-0.176	0.81	EE_transcribedGeneBody	L3_transcribedGeneBody	YA_lowSignal
chrI	4314264	4314635	peak1288	-0.812	0.0283	0.28	0.865	EE_transcribedGeneBody	L3_transcribedGeneBody	YA_repressedEnhancer
chrI	4315071	4315313	peak1289	0.286	0.631	1.002	0.443	EE_repressedEnhancer	L3_transcribedGeneBody	NA
chrI	4320610	4321197	peak1290	-1.306	0.000315	0.941	0.305	EE_activeEnhancer	L3_transcribedGeneBody	YA_repressedEnhancer
chrI	4321409	4321637	peak1291	0.949	0.0636	0.675	0.676	EE_activeEnhancer	L3_transcribedGeneBody	YA_repressedEnhancer
chrI	4322345	4322986	peak1292	0.182	0.775	0.293	0.818	EE_activeEnhancer	L3_transcribedGeneBody	YA_lowSignal
chrI	4324092	4324316	peak1293	-1.364	0.000405	1.487	0.162	EE_lowSignal	L3_transcribedGeneBody	YA_transcribedGeneBody
chrI	4328104	4328309	peak1294	-0.733	0.0298	-0.345	0.888	EE_lowSignal	L3_transcribedGeneBody	YA_lowSignal
chrI	4328896	4329585	peak1295	-1.721	2.06e-06	0.591	0.6	EE_lowSignal	L3_transcribedGeneBody	YA_activeEnhancer
chrI	4330279	4330849	peak1296	-1.737	1.5e-06	0.281	0.813	NA	L3_transcribedGeneBody	YA_lowSignal
chrI	4332124	4332542	peak1297	-1.356	0.000223	0.179	0.899	EE_transcribedGeneBody	L3_transcribedGeneBody	YA_lowSignal
chrI	4333830	4334112	peak1298	-1.644	7.8e-06	0.518	0.672	EE_repressedEnhancer	L3_transcribedGeneBody	YA_lowSignal
chrI	4334375	4334685	peak1299	-2.045	6.04e-08	0.72	0.509	EE_lowSignal	L3_transcribedGeneBody	YA_lowSignal
chrI	4360028	4360113	peak1300	0.746	0.405	-0.614	0.698	EE_lowSignal	L3_lowSignal	YA_lowSignal
chrI	4365060	4365562	peak1301	0.643	0.127	-0.474	0.657	EE_lowSignal	L3_transcribedGeneBody	YA_H3K27me3Repressed
chrI	4365637	4366820	peak1302	0.231	0.606	-0.612	0.559	EE_lowSignal	L3_transcribedGeneBody	YA_transcribedGeneBody
chrI	4368897	4369133	peak1303	0.41	0.386	-0.863	0.497	EE_transcribedGeneBody	L3_transcribedGeneBody	YA_transcribedGeneBody
chrI	4369321	4369769	peak1304	0.297	0.534	-0.756	0.496	EE_transcribedGeneBody	L3_transcribedGeneBody	YA_transcribedGeneBody
chrI	4370141	4370439	peak1305	1.274	0.0064	-0.56	0.698	EE_transcribedGeneBody	L3_transcribedGeneBody	YA_transcribedGeneBody
chrI	4370842	4371358	peak1306	1.211	0.00279	-1.179	0.199	EE_transcribedGeneBody	L3_transcribedGeneBody	YA_transcribedGeneBody
chrI	4372543	4372713	peak1307	0.523	0.285	-0.798	0.54	EE_promoterTSS	L3_transcribedGeneBody	YA_promoterTSS
chrI	4375086	4375319	peak1308	1.8	0.00689	-1.759	0.0987	EE_lowSignal	L3_transcribedGeneBody	NA
chrI	4381604	4382135	peak1309	-0.436	0.266	-0.448	0.699	EE_promoterTSS	L3_promoterTSS	YA_promoterTSS
chrI	4382601	4382801	peak1310	0.771	0.442	-1.87	0.129	EE_activeEnhancer	L3_transcribedGeneBody	YA_transcribedGeneBody
chrI	4386427	4386775	peak1311	-1.398	0.000161	0.71	0.49	EE_promoterTSS	L3_promoterTSS	YA_promoterTSS
chrI	4388288	4389180	peak1312	-0.399	0.354	-0.512	0.642	EE_transcribedGeneBody	L3_transcribedGeneBody	YA_transcribedGeneBody
chrI	4390020	4390256	peak1313	0.047	0.912	-0.762	0.551	EE_transcribedGeneBody	L3_transcribedGeneBody	YA_transcribedGeneBody
chrI	4395824	4395995	peak1314	0.248	0.736	0.007	0.953	EE_transcribedGeneBody	L3_transcribedGeneBody	YA_transcribedGeneBody
chrI	4396105	4396379	peak1315	-0.613	0.161	0.191	0.888	EE_transcribedGeneBody	L3_transcribedGeneBody	YA_transcribedGeneBody
chrI	4396709	4397231	peak1316	-0.476	0.266	-0.022	0.977	EE_transcribedGeneBody	L3_transcribedGeneBody	YA_transcribedGeneBody
chrI	4399005	4399218	peak1317	-0.576	0.208	-0.242	0.907	EE_transcribedGeneBody	L3_transcribedGeneBody	YA_transcribedGeneBody
chrI	4399796	4400008	peak1318	-0.051	0.864	-0.552	0.599	EE_transcribedGeneBody	L3_transcribedGeneBody	YA_transcribedGeneBody
chrI	4401075	4401530	peak1319	-0.637	0.135	-0.248	0.858	EE_transcribedGeneBody	L3_transcribedGeneBody	YA_transcribedGeneBody
chrI	4403776	4403926	peak1320	0.029	0.711	-0.068	0.815	EE_lowSignal	L3_lowSignal	YA_lowSignal
chrI	4404689	4404920	peak1321	0.524	0.515	0.569	0.649	EE_lowSignal	L3_lowSignal	YA_H3K27me3Repressed
chrI	4407064	4407605	peak1322	-0.212	0.691	0.766	0.482	EE_repressedEnhancer	L3_repressedEnhancer	YA_lowSignal
chrI	4415341	4415491	peak1323	-0.398	0.414	0.855	0.608	EE_lowSignal	L3_lowSignal	YA_lowSignal
chrI	4420739	4421090	peak1324	-0.803	0.0533	1.049	0.314	EE_lowSignal	L3_repressedEnhancer	YA_repressedEnhancer
chrI	4424280	4424378	peak1325	0.525	0.208	0.084	0.89	EE_lowSignal	L3_lowSignal	YA_lowSignal
chrI	4424929	4425042	peak1326	-0.414	0.672	0.501	0.761	EE_lowSignal	L3_lowSignal	YA_lowSignal
chrI	4431974	4432264	peak1327	-1.547	5.55e-05	1.06	0.266	EE_transcribedGeneBody	L3_transcribedGeneBody	YA_activeEnhancer
chrI	4433051	4433387	peak1328	-1.184	0.00197	0.552	0.622	EE_transcribedGeneBody	L3_activeEnhancer	YA_activeEnhancer
chrI	4434022	4434240	peak1329	-1.872	1.01e-06	1.002	0.263	EE_transcribedGeneBody	L3_activeEnhancer	YA_activeEnhancer
chrI	4435029	4435247	peak1330	0.107	0.989	0.457	0.735	EE_transcribedGeneBody	L3_activeEnhancer	YA_activeEnhancer
chrI	4436662	4437095	peak1331	-2.217	1.99e-09	1.237	0.171	EE_transcribedGeneBody	L3_transcribedGeneBody	YA_activeEnhancer
chrI	4437928	4438194	peak1332	-0.845	0.0253	0.531	0.764	EE_transcribedGeneBody	L3_activeEnhancer	YA_transcribedGeneBody
chrI	4439031	4439213	peak1333	-1.788	2.15e-05	0.893	0.565	EE_transcribedGeneBody	L3_transcribedGeneBody	YA_transcribedGeneBody
chrI	4443662	4444010	peak1334	0.439	0.384	-0.987	0.39	EE_promoterTSS	L3_transcribedGeneBody	YA_promoterTSS
chrI	4444379	4444582	peak1335	-0.692	0.11	0.048	0.98	EE_promoterTSS	L3_promoterTSS	YA_promoterTSS
chrI	4445498	4445766	peak1336	0.019	0.997	0.104	0.956	EE_transcribedGeneBody	L3_transcribedGeneBody	YA_transcribedGeneBody
chrI	4451045	4451208	peak1337	-0.018	0.694	-0.869	0.532	EE_promoterTSS	L3_lowSignal	YA_lowSignal
chrI	4460195	4461195	peak1338	-0.192	0.715	-1.013	0.269	EE_heterochromatin	L3_heterochromatin	YA_transcribedGeneBody
chrI	4461246	4462239	peak1339	-0.146	0.813	-0.891	0.345	EE_heterochromatin	L3_heterochromatin	YA_transcribedGeneBody
chrI	4464298	4465103	peak1340	0.453	0.243	-1.153	0.203	EE_heterochromatin	L3_heterochromatin	YA_transcribedGeneBody
chrI	4466921	4467111	peak1341	-0.606	0.196	0.413	0.821	EE_heterochromatin	L3_lowSignal	YA_transcribedGeneBody
chrI	4467728	4468147	peak1342	-0.279	0.649	-0.6	0.608	EE_H3K27me3Repressed	L3_lowSignal	YA_transcribedGeneBody
chrI	4475067	4475467	peak1343	-0.674	0.0867	0.538	0.61	EE_repressedEnhancer	NA	YA_repressedEnhancer
chrI	4484980	4485245	peak1344	-1.426	0.000133	0.6	0.636	NA	L3_transcribedGeneBody	YA_activeEnhancer
chrI	4486650	4487438	peak1345	-1.77	9.04e-07	0.689	0.507	NA	L3_transcribedGeneBody	YA_transcribedGeneBody
chrI	4490135	4490868	peak1346	-3.007	1.9e-16	0.818	0.385	EE_H3K27me3Repressed	L3_transcribedGeneBody	YA_activeEnhancer
chrI	4491503	4491892	peak1347	-0.148	0.765	-0.427	0.728	EE_heterochromatin	L3_transcribedGeneBody	YA_activeEnhancer
chrI	4493849	4494271	peak1348	-0.873	0.0238	0.056	0.973	EE_heterochromatin	L3_transcribedGeneBody	YA_activeEnhancer
chrI	4494803	4495423	peak1349	-0.691	0.0724	-0.375	0.763	EE_lowSignal	L3_transcribedGeneBody	YA_transcribedGeneBody
chrI	4495567	4497049	peak1350	-0.75	0.0486	0.469	0.667	EE_heterochromatin	L3_activeEnhancer	YA_activeEnhancer
chrI	4500454	4500673	peak1351	0.884	0.0432	-0.558	0.521	EE_transcribedGeneBody	L3_transcribedGeneBody	YA_transcribedGeneBody
chrI	4511964	4512422	peak1352	0.277	0.548	-1.082	0.303	EE_transcribedGeneBody	L3_transcribedGeneBody	YA_transcribedGeneBody
chrI	4516145	4516510	peak1353	-0.865	0.0203	0.682	0.521	EE_activeEnhancer	L3_activeEnhancer	YA_activeEnhancer
chrI	4535779	4536510	peak1354	-1.613	6.01e-06	0.264	0.831	EE_promoterTSS	NA	YA_activeEnhancer
chrI	4552944	4553200	peak1355	-0.409	0.453	-0.012	0.991	EE_H3K27me3Repressed	L3_H3K27me3Repressed	YA_H3K27me3Repressed
chrI	4557070	4557476	peak1356	-1.072	0.00369	0.163	0.902	EE_activeEnhancer	L3_transcribedGeneBody	YA_activeEnhancer
chrI	4559281	4559536	peak1357	-0.08	0.99	-0.196	0.932	EE_lowSignal	L3_transcribedGeneBody	YA_transcribedGeneBody
chrI	4570932	4571216	peak1358	1.221	0.00177	-0.169	0.896	EE_repressedEnhancer	L3_lowSignal	YA_H3K27me3Repressed
chrI	4571950	4572178	peak1359	1.404	0.00145	-1.521	0.188	EE_repressedEnhancer	L3_H3K27me3Repressed	YA_heterochromatin
chrI	4574214	4574336	peak1360	1.752	0.000125	-2.914	0.000178	EE_H3K27me3Repressed	L3_heterochromatin	YA_H3K27me3Repressed
chrI	4583631	4584543	peak1361	-0.307	0.467	-0.692	0.5	EE_promoterTSS	L3_promoterTSS	YA_promoterTSS
chrI	4584690	4585353	peak1362	-1.14	0.00181	-0.239	0.853	EE_promoterTSS	L3_promoterTSS	YA_promoterTSS
chrI	4585388	4585757	peak1363	0.038	0.985	-1.286	0.169	EE_promoterTSS	L3_promoterTSS	YA_promoterTSS
chrI	4586221	4586942	peak1364	-0.1	0.854	-0.422	0.679	EE_transcribedGeneBody	L3_transcribedGeneBody	YA_transcribedGeneBody
chrI	4592322	4592573	peak1365	-0.302	0.483	0.541	0.668	EE_lowSignal	L3_repressedEnhancer	YA_repressedEnhancer
chrI	4599312	4599583	peak1366	1.733	0.0005	-1.787	0.109	EE_transcribedGeneBody	L3_transcribedGeneBody	YA_transcribedGeneBody
chrI	4601785	4601990	peak1367	0.49	0.412	-0.064	0.876	EE_transcribedGeneBody	L3_transcribedGeneBody	YA_transcribedGeneBody
chrI	4602934	4603599	peak1368	-0.318	0.471	0.035	0.98	EE_promoterTSS	L3_promoterTSS	YA_promoterTSS
chrI	4607395	4607726	peak1369	-0.036	0.984	-0.537	0.677	EE_transcribedGeneBody	L3_transcribedGeneBody	YA_transcribedGeneBody
chrI	4634296	4635448	peak1370	-0.193	0.703	-0.795	0.413	EE_transcribedGeneBody	L3_transcribedGeneBody	YA_transcribedGeneBody
chrI	4635779	4636069	peak1371	-0.595	0.155	-0.268	0.839	EE_transcribedGeneBody	L3_promoterTSS	YA_promoterTSS
chrI	4636408	4636652	peak1372	-1.486	0.000195	0.791	0.616	EE_transcribedGeneBody	L3_activeEnhancer	YA_promoterTSS
chrI	4643024	4643237	peak1373	0.446	0.744	-0.803	0.616	EE_transcribedGeneBody	L3_transcribedGeneBody	YA_promoterTSS
chrI	4644283	4644570	peak1374	-2.22	2.32e-09	1.161	0.217	EE_promoterTSS	L3_promoterTSS	YA_promoterTSS
chrI	4645422	4645639	peak1375	-0.878	0.0547	-0.564	0.592	EE_transcribedGeneBody	L3_promoterTSS	YA_transcribedGeneBody
chrI	4645701	4646760	peak1376	-0.761	0.0464	-0.516	0.626	EE_transcribedGeneBody	L3_promoterTSS	YA_promoterTSS
chrI	4647150	4647389	peak1377	-1.186	0.00132	0.249	0.876	EE_promoterTSS	L3_promoterTSS	YA_promoterTSS
chrI	4651097	4651252	peak1378	0.171	0.999	-0.285	0.893	EE_promoterTSS	L3_activeEnhancer	YA_promoterTSS
chrI	4651744	4652058	peak1379	-1.601	1.18e-05	0.8	0.411	EE_activeEnhancer	L3_promoterTSS	YA_activeEnhancer
chrI	4652488	4652689	peak1380	-0.136	0.828	-0.114	0.952	EE_activeEnhancer	L3_activeEnhancer	YA_activeEnhancer
chrI	4653651	4654410	peak1381	-1.127	0.00192	0.211	0.871	EE_promoterTSS	L3_promoterTSS	YA_activeEnhancer
chrI	4662316	4662800	peak1382	0.729	0.0598	0.174	0.892	EE_activeEnhancer	L3_lowSignal	YA_lowSignal
chrI	4663357	4663662	peak1383	1.599	0.000104	-0.201	0.973	EE_activeEnhancer	L3_lowSignal	YA_lowSignal
chrI	4664010	4664382	peak1384	0.955	0.0121	0.007	0.983	EE_repressedEnhancer	L3_H3K27me3Repressed	YA_H3K27me3Repressed
chrI	4671616	4672122	peak1385	-0.376	0.306	-0.618	0.594	EE_promoterTSS	L3_promoterTSS	YA_promoterTSS
chrI	4672193	4672415	peak1386	-0.737	0.0431	-0.531	0.696	EE_activeEnhancer	L3_promoterTSS	YA_promoterTSS
chrI	4672723	4672927	peak1387	-1.916	3.14e-07	0.659	0.616	EE_activeEnhancer	L3_activeEnhancer	YA_promoterTSS
chrI	4673541	4674346	peak1388	-2.615	5.19e-13	0.83	0.379	EE_activeEnhancer	L3_promoterTSS	YA_activeEnhancer
chrI	4678989	4679295	peak1389	0.85	0.0384	0.067	0.923	EE_activeEnhancer	L3_transcribedGeneBody	YA_transcribedGeneBody
chrI	4679492	4679721	peak1390	3.309	5.36e-10	-2.103	0.151	EE_promoterTSS	L3_lowSignal	YA_transcribedGeneBody
chrI	4679769	4680507	peak1391	1.593	0.000141	-0.348	0.734	EE_promoterTSS	L3_lowSignal	YA_transcribedGeneBody
chrI	4687293	4687480	peak1392	0.333	0.539	-0.518	0.832	EE_transcribedGeneBody	L3_transcribedGeneBody	YA_transcribedGeneBody
chrI	4687968	4688090	peak1393	-0.567	0.556	0.513	0.874	EE_transcribedGeneBody	L3_transcribedGeneBody	YA_transcribedGeneBody
chrI	4688215	4688802	peak1394	-0.284	0.624	-0.095	0.943	EE_transcribedGeneBody	L3_transcribedGeneBody	YA_transcribedGeneBody
chrI	4689979	4690237	peak1395	0.323	0.509	-0.495	0.817	EE_transcribedGeneBody	L3_transcribedGeneBody	YA_transcribedGeneBody
chrI	4694033	4694141	peak1396	0.502	0.282	-0.497	0.795	EE_transcribedGeneBody	L3_transcribedGeneBody	YA_transcribedGeneBody
chrI	4699177	4699831	peak1397	-1.648	3.49e-06	0.633	0.529	EE_promoterTSS	L3_promoterTSS	YA_lowSignal
chrI	4701061	4701773	peak1398	-1.655	3.08e-06	0.744	0.437	EE_promoterTSS	L3_activeEnhancer	YA_activeEnhancer
chrI	4701855	4702119	peak1399	-0.304	0.514	0.741	0.443	EE_promoterTSS	L3_activeEnhancer	YA_activeEnhancer
chrI	4703166	4703518	peak1400	-0.445	0.287	0.38	0.729	EE_activeEnhancer	L3_activeEnhancer	YA_repressedEnhancer
chrI	4709628	4710094	peak1401	0.237	0.571	-0.127	0.893	EE_H3K27me3Repressed	L3_lowSignal	YA_heterochromatin
chrI	4715038	4715143	peak1402	-0.082	0.936	0.307	0.987	EE_H3K27me3Repressed	L3_lowSignal	YA_H3K27me3Repressed
chrI	4720989	4721422	peak1403	-1.183	0.00106	0.449	0.707	EE_repressedEnhancer	L3_lowSignal	YA_lowSignal
chrI	4731397	4731630	peak1404	-1.016	0.00764	1.736	0.0895	EE_lowSignal	L3_lowSignal	YA_lowSignal
chrI	4745119	4746024	peak1405	-0.628	0.101	0.558	0.596	EE_activeEnhancer	L3_activeEnhancer	YA_activeEnhancer
chrI	4746432	4746761	peak1406	-0.6	0.156	0.721	0.449	EE_transcribedGeneBody	L3_activeEnhancer	YA_activeEnhancer
chrI	4746807	4747258	peak1407	-0.986	0.00977	0.663	0.529	NA	L3_activeEnhancer	YA_activeEnhancer
chrI	4747684	4747844	peak1408	0.76	0.0695	-0.425	0.766	EE_activeEnhancer	L3_promoterTSS	YA_activeEnhancer
chrI	4748852	4749008	peak1409	0.604	0.366	-0.243	0.908	EE_repressedEnhancer	L3_transcribedGeneBody	YA_transcribedGeneBody
chrI	4750378	4750636	peak1410	0.125	0.87	0.168	0.971	EE_repressedEnhancer	L3_activeEnhancer	YA_activeEnhancer
chrI	4751635	4751919	peak1411	1.558	0.0149	-0.881	0.524	EE_repressedEnhancer	L3_transcribedGeneBody	YA_transcribedGeneBody
chrI	4760096	4760480	peak1412	0.595	0.177	-0.996	0.309	EE_transcribedGeneBody	L3_transcribedGeneBody	YA_transcribedGeneBody
chrI	4764664	4765171	peak1413	0.443	0.501	-1.11	0.283	EE_activeEnhancer	L3_lowSignal	YA_transcribedGeneBody
chrI	4769516	4770810	peak1414	-0.719	0.0567	-0.098	0.949	EE_promoterTSS	L3_promoterTSS	YA_promoterTSS
chrI	4770812	4771304	peak1415	-0.335	0.464	-0.08	0.96	EE_transcribedGeneBody	L3_transcribedGeneBody	YA_promoterTSS
chrI	4773034	4773326	peak1416	-0.467	0.255	0.326	0.777	EE_promoterTSS	L3_promoterTSS	YA_promoterTSS
chrI	4776276	4776681	peak1417	0.03	0.952	-0.275	0.832	EE_transcribedGeneBody	L3_transcribedGeneBody	YA_transcribedGeneBody
chrI	4777515	4778044	peak1418	0.089	0.854	0.499	0.728	EE_transcribedGeneBody	L3_transcribedGeneBody	YA_transcribedGeneBody
chrI	4778771	4778959	peak1419	0.928	0.374	-0.022	0.948	EE_transcribedGeneBody	L3_transcribedGeneBody	YA_transcribedGeneBody
chrI	4779693	4780002	peak1420	0.806	0.071	-0.718	0.509	EE_activeEnhancer	L3_transcribedGeneBody	YA_transcribedGeneBody
chrI	4780187	4780728	peak1421	0.772	0.0442	0.793	0.546	EE_activeEnhancer	L3_transcribedGeneBody	YA_transcribedGeneBody
chrI	4781363	4781654	peak1422	-0.632	0.0605	0.738	0.382	EE_promoterTSS	L3_activeEnhancer	YA_activeEnhancer
chrI	4781915	4782040	peak1423	-0.49	0.393	0.729	0.602	EE_lowSignal	L3_transcribedGeneBody	YA_transcribedGeneBody
chrI	4785893	4786512	peak1424	-0.221	0.607	0.589	0.57	EE_activeEnhancer	L3_transcribedGeneBody	YA_activeEnhancer
chrI	4787888	4788211	peak1425	0.273	0.593	0.066	0.98	EE_promoterTSS	L3_activeEnhancer	YA_activeEnhancer
chrI	4788954	4789178	peak1426	0.207	0.955	-0.316	0.879	EE_promoterTSS	L3_promoterTSS	YA_activeEnhancer
chrI	4789856	4790180	peak1427	-0.85	0.0146	-0.644	0.582	EE_promoterTSS	L3_promoterTSS	YA_promoterTSS
chrI	4790364	4791520	peak1429	-0.59	0.133	-0.858	0.357	EE_transcribedGeneBody	L3_promoterTSS	YA_promoterTSS
chrI	4790387	4790710	peak1428	-0.59	0.133	-0.858	0.357	EE_promoterTSS	L3_promoterTSS	YA_promoterTSS
chrI	4792421	4792847	peak1430	-1.156	0.00226	1.041	0.304	EE_repressedEnhancer	L3_activeEnhancer	YA_repressedEnhancer
chrI	4798267	4798757	peak1431	1.123	0.0072	0.695	0.612	EE_repressedEnhancer	L3_lowSignal	YA_repressedEnhancer
chrI	4799664	4799882	peak1432	0.445	0.328	-0.113	0.989	EE_lowSignal	L3_lowSignal	YA_lowSignal
chrI	4803669	4804013	peak1433	0.087	0.738	0.294	0.915	EE_repressedEnhancer	L3_repressedEnhancer	YA_activeEnhancer
chrI	4804411	4804713	peak1434	-0.605	0.141	0.095	0.984	EE_repressedEnhancer	L3_activeEnhancer	YA_activeEnhancer
chrI	4804824	4804963	peak1435	-1.419	0.000485	0.863	0.577	EE_repressedEnhancer	L3_activeEnhancer	YA_activeEnhancer
chrI	4815924	4816040	peak1436	0.57	0.944	-0.857	0.953	EE_lowSignal	L3_lowSignal	YA_heterochromatin
chrI	4825175	4825351	peak1437	0.692	0.0973	0.069	0.936	EE_transcribedGeneBody	L3_lowSignal	YA_transcribedGeneBody
chrI	4829023	4829244	peak1438	0.889	0.15	-0.698	0.505	EE_transcribedGeneBody	L3_lowSignal	YA_transcribedGeneBody
chrI	4829885	4830042	peak1439	0.316	0.954	0.164	0.921	EE_promoterTSS	L3_promoterTSS	YA_transcribedGeneBody
chrI	4840840	4841209	peak1440	-1.05	0.00684	1.459	0.117	EE_repressedEnhancer	L3_activeEnhancer	YA_transcribedGeneBody
chrI	4841938	4842088	peak1441	0.098	0.904	0.565	0.713	EE_lowSignal	L3_transcribedGeneBody	YA_transcribedGeneBody
chrI	4842527	4842746	peak1442	-0.307	0.631	1.775	0.117	EE_repressedEnhancer	L3_lowSignal	YA_transcribedGeneBody
chrI	4848056	4848235	peak1443	-0.318	0.55	0.434	0.752	EE_activeEnhancer	L3_activeEnhancer	YA_activeEnhancer
chrI	4849923	4850139	peak1444	0.569	0.248	-0.566	0.666	EE_transcribedGeneBody	L3_transcribedGeneBody	YA_transcribedGeneBody
chrI	4853072	4853222	peak1445	-0.298	0.788	-0.083	0.992	EE_lowSignal	L3_lowSignal	YA_heterochromatin
chrI	4861870	4862253	peak1446	0.153	0.871	0.651	0.624	EE_lowSignal	L3_repressedEnhancer	YA_H3K27me3Repressed
chrI	4875966	4876116	peak1447	-0.088	0.766	0.089	0.936	EE_H3K27me3Repressed	L3_lowSignal	YA_H3K27me3Repressed
chrI	4881176	4881686	peak1448	-1.408	0.000154	1.201	0.168	EE_repressedEnhancer	L3_lowSignal	YA_repressedEnhancer
chrI	4888837	4889099	peak1449	-0.122	0.864	-0.333	0.832	EE_lowSignal	L3_transcribedGeneBody	YA_lowSignal
chrI	4889266	4889427	peak1450	0.243	0.962	0.001	0.721	EE_lowSignal	L3_repressedEnhancer	YA_repressedEnhancer
chrI	4900904	4901142	peak1451	-1.875	7.65e-07	0.997	0.288	EE_lowSignal	L3_lowSignal	YA_lowSignal
chrI	4904047	4904230	peak1452	-0.258	0.862	-0.004	0.99	EE_lowSignal	L3_lowSignal	YA_heterochromatin
chrI	4904536	4905185	peak1453	-0.175	0.814	0.102	0.941	EE_lowSignal	L3_lowSignal	YA_heterochromatin
chrI	4906618	4907034	peak1454	-1.859	5.92e-07	0.686	0.531	EE_lowSignal	L3_promoterTSS	YA_H3K27me3Repressed
chrI	4907731	4907827	peak1455	0.081	0.925	-0.063	0.849	EE_lowSignal	L3_activeEnhancer	YA_lowSignal
chrI	4908139	4908384	peak1456	-0.93	0.0143	0.618	0.548	EE_repressedEnhancer	L3_activeEnhancer	YA_lowSignal
chrI	4908982	4909237	peak1457	0.624	0.134	0.83	0.621	EE_repressedEnhancer	L3_repressedEnhancer	YA_repressedEnhancer
chrI	4909617	4909802	peak1458	0.132	0.704	0.612	0.796	EE_lowSignal	L3_transcribedGeneBody	YA_repressedEnhancer
chrI	4911945	4912143	peak1459	-0.494	0.282	0.419	0.679	EE_transcribedGeneBody	L3_transcribedGeneBody	YA_transcribedGeneBody
chrI	4914145	4914635	peak1460	-2.515	5.07e-12	0.472	0.669	EE_promoterTSS	L3_promoterTSS	YA_activeEnhancer
chrI	4914788	4915159	peak1461	-1.334	0.000326	0.758	0.469	EE_transcribedGeneBody	L3_activeEnhancer	YA_activeEnhancer
chrI	4916137	4916961	peak1462	-1.519	2.63e-05	0.343	0.768	EE_transcribedGeneBody	L3_activeEnhancer	YA_activeEnhancer
chrI	4917658	4917900	peak1463	-0.666	0.0932	0.133	0.945	EE_promoterTSS	L3_promoterTSS	YA_activeEnhancer
chrI	4920112	4920482	peak1464	0.33	0.491	0.2	0.954	EE_transcribedGeneBody	L3_transcribedGeneBody	YA_transcribedGeneBody
chrI	4923795	4924067	peak1465	-0.198	0.678	-0.24	0.869	EE_transcribedGeneBody	L3_transcribedGeneBody	YA_transcribedGeneBody
chrI	4926454	4926658	peak1466	-0.973	0.00316	-0.308	0.84	EE_promoterTSS	L3_promoterTSS	YA_transcribedGeneBody
chrI	4932776	4933303	peak1467	-1.059	0.0035	0.576	0.576	EE_promoterTSS	L3_promoterTSS	YA_activeEnhancer
chrI	4933240	4933724	peak1468	-1.059	0.0035	0.576	0.576	EE_promoterTSS	L3_promoterTSS	YA_activeEnhancer
chrI	4933877	4934080	peak1469	-0.473	0.216	0.817	0.452	EE_promoterTSS	L3_activeEnhancer	YA_activeEnhancer
chrI	4935971	4936583	peak1470	-1.312	0.000287	1.385	0.0925	EE_activeEnhancer	L3_transcribedGeneBody	YA_activeEnhancer
chrI	4941030	4941784	peak1471	-1.763	1.07e-06	0.441	0.686	EE_transcribedGeneBody	L3_transcribedGeneBody	YA_transcribedGeneBody
chrI	4943022	4943521	peak1472	-0.154	0.696	0.143	0.927	EE_transcribedGeneBody	L3_transcribedGeneBody	YA_transcribedGeneBody
chrI	4944001	4944456	peak1473	-0.334	0.479	0.094	0.958	EE_transcribedGeneBody	L3_transcribedGeneBody	YA_transcribedGeneBody
chrI	4946673	4946890	peak1474	0.51	0.249	0.112	0.97	EE_transcribedGeneBody	L3_transcribedGeneBody	YA_transcribedGeneBody
chrI	4947063	4947389	peak1475	0.591	0.205	-0.895	0.43	EE_transcribedGeneBody	L3_transcribedGeneBody	YA_transcribedGeneBody
chrI	4947601	4948572	peak1476	0.205	0.654	-0.53	0.625	EE_transcribedGeneBody	L3_transcribedGeneBody	YA_transcribedGeneBody
chrI	4948800	4949006	peak1477	-0.187	0.664	0.001	0.914	EE_transcribedGeneBody	L3_transcribedGeneBody	YA_transcribedGeneBody
chrI	4949654	4949768	peak1478	0.861	0.308	-0.78	0.613	EE_transcribedGeneBody	L3_transcribedGeneBody	YA_transcribedGeneBody
chrI	4952296	4952788	peak1479	0.313	0.578	-0.386	0.818	EE_transcribedGeneBody	L3_transcribedGeneBody	YA_transcribedGeneBody
chrI	4962947	4963147	peak1480	-0.274	0.694	-0.427	0.781	EE_transcribedGeneBody	L3_transcribedGeneBody	YA_transcribedGeneBody
chrI	4963975	4964202	peak1481	0.529	0.324	-0.832	0.462	EE_transcribedGeneBody	L3_lowSignal	YA_transcribedGeneBody
chrI	4965061	4965640	peak1482	0.104	0.775	-0.511	0.618	EE_transcribedGeneBody	L3_transcribedGeneBody	YA_transcribedGeneBody
chrI	4966434	4966632	peak1483	-0.552	0.282	-0.484	0.739	EE_transcribedGeneBody	L3_transcribedGeneBody	YA_transcribedGeneBody
chrI	4967336	4967753	peak1484	-1.231	0.000897	-0.278	0.842	NA	L3_promoterTSS	YA_lowSignal
chrI	4968418	4968816	peak1485	0.39	0.335	-0.586	0.561	EE_repressedEnhancer	L3_lowSignal	YA_H3K27me3Repressed
chrI	4973092	4973386	peak1486	1.095	0.00914	0.335	0.75	EE_repressedEnhancer	L3_repressedEnhancer	YA_repressedEnhancer
chrI	4974050	4975218	peak1487	-0.59	0.127	1.221	0.155	EE_repressedEnhancer	L3_activeEnhancer	NA
chrI	4975984	4976584	peak1488	0.022	0.984	0.716	0.515	EE_repressedEnhancer	L3_transcribedGeneBody	YA_repressedEnhancer
chrI	4977361	4977675	peak1489	-0.319	0.46	0.593	0.569	EE_repressedEnhancer	L3_transcribedGeneBody	YA_activeEnhancer
chrI	4985898	4986077	peak1490	-0.327	0.673	0.351	0.837	EE_H3K27me3Repressed	L3_lowSignal	YA_H3K27me3Repressed
chrI	4991859	4992443	peak1491	-0.222	0.577	0.344	0.733	EE_activeEnhancer	L3_lowSignal	YA_repressedEnhancer
chrI	4993292	4993949	peak1492	0.7	0.0984	-0.455	0.731	EE_activeEnhancer	L3_transcribedGeneBody	NA
chrI	4994456	4994837	peak1493	0.939	0.025	0.593	0.738	EE_activeEnhancer	L3_transcribedGeneBody	YA_activeEnhancer
chrI	4995438	4995712	peak1494	1.175	0.0329	0.573	0.721	EE_transcribedGeneBody	L3_transcribedGeneBody	YA_activeEnhancer
chrI	4996508	4996678	peak1495	-0.088	0.286	-0.548	0.846	EE_transcribedGeneBody	L3_activeEnhancer	YA_activeEnhancer
chrI	5008545	5008874	peak1496	-1.359	0.000265	0.332	0.778	EE_lowSignal	L3_lowSignal	YA_activeEnhancer
chrI	5009894	5010107	peak1497	-1.19	0.00383	1.476	0.199	EE_lowSignal	L3_lowSignal	YA_lowSignal
chrI	5014685	5014895	peak1498	0.809	0.107	-0.304	0.938	EE_repressedEnhancer	L3_lowSignal	YA_H3K27me3Repressed
chrI	5015632	5016017	peak1499	-1.824	1.27e-06	1.419	0.138	EE_H3K27me3Repressed	L3_repressedEnhancer	YA_repressedEnhancer
chrI	5020015	5020431	peak1500	-1.446	0.000132	0.568	0.597	EE_repressedEnhancer	L3_lowSignal	YA_H3K27me3Repressed
chrI	5025333	5025726	peak1501	-1.122	0.00136	0.163	0.897	EE_repressedEnhancer	L3_activeEnhancer	YA_activeEnhancer
chrI	5027652	5027827	peak1502	1.403	0.0317	-0.842	0.528	EE_lowSignal	L3_transcribedGeneBody	YA_activeEnhancer
chrI	5031108	5031405	peak1503	-0.924	0.00996	-0.404	0.763	EE_H3K27me3Repressed	L3_lowSignal	YA_activeEnhancer
chrI	5032973	5033207	peak1504	-0.417	0.312	-0.639	0.609	EE_lowSignal	L3_lowSignal	YA_activeEnhancer
chrI	5033276	5033572	peak1505	-1.303	0.000605	-0.304	0.81	EE_lowSignal	L3_activeEnhancer	YA_activeEnhancer
chrI	5035561	5035899	peak1506	-1.588	1.62e-05	0.938	0.369	EE_lowSignal	L3_repressedEnhancer	YA_activeEnhancer
chrI	5037222	5037662	peak1507	-1.474	9.65e-05	-0.003	0.998	EE_lowSignal	L3_transcribedGeneBody	YA_lowSignal
chrI	5042209	5042947	peak1508	0.073	0.889	-0.534	0.653	EE_H3K27me3Repressed	L3_lowSignal	YA_H3K27me3Repressed
chrI	5045058	5045618	peak1509	0.039	0.874	0.334	0.887	EE_H3K27me3Repressed	L3_lowSignal	YA_H3K27me3Repressed
chrI	5047042	5047236	peak1510	0.171	0.713	-0.354	0.82	EE_lowSignal	L3_lowSignal	YA_H3K27me3Repressed
chrI	5056896	5057362	peak1511	-1.316	0.00038	1.094	0.275	EE_lowSignal	L3_activeEnhancer	YA_activeEnhancer
chrI	5057367	5057635	peak1512	-0.752	0.0387	0.097	0.92	EE_lowSignal	L3_activeEnhancer	YA_lowSignal
chrI	5058838	5059267	peak1513	0.161	0.695	-0.538	0.699	EE_lowSignal	L3_transcribedGeneBody	YA_transcribedGeneBody
chrI	5061980	5062508	peak1514	0.048	0.799	-0.305	0.876	EE_lowSignal	L3_transcribedGeneBody	YA_repressedEnhancer
chrI	5065720	5066156	peak1515	-0.028	0.985	0.274	0.859	EE_lowSignal	L3_transcribedGeneBody	YA_lowSignal
chrI	5066341	5066594	peak1516	0.346	0.461	0.165	0.94	EE_lowSignal	L3_transcribedGeneBody	YA_lowSignal
chrI	5067055	5067489	peak1517	0.8	0.0601	0.162	0.881	EE_repressedEnhancer	L3_transcribedGeneBody	YA_repressedEnhancer
chrI	5068205	5068774	peak1518	0.659	0.158	-0.604	0.661	EE_lowSignal	L3_transcribedGeneBody	YA_lowSignal
chrI	5070169	5070437	peak1519	0.712	0.18	-0.571	0.698	EE_repressedEnhancer	L3_transcribedGeneBody	YA_activeEnhancer
chrI	5072208	5072667	peak1520	-1.679	4.74e-06	0.991	0.291	EE_lowSignal	L3_lowSignal	YA_repressedEnhancer
chrI	5073875	5074118	peak1521	-0.715	0.12	1.508	0.135	EE_lowSignal	L3_transcribedGeneBody	YA_lowSignal
chrI	5076859	5077189	peak1522	0.342	0.526	0.277	0.908	EE_repressedEnhancer	L3_lowSignal	YA_repressedEnhancer
chrI	5077882	5078071	peak1523	0.454	0.432	-0.204	0.99	EE_repressedEnhancer	L3_repressedEnhancer	YA_repressedEnhancer
chrI	5079721	5079927	peak1524	0.477	0.497	-0.8	0.632	EE_transcribedGeneBody	L3_transcribedGeneBody	YA_activeEnhancer
chrI	5082357	5082587	peak1525	-0.745	0.0542	0.054	0.994	EE_promoterTSS	L3_promoterTSS	YA_promoterTSS
chrI	5083161	5083468	peak1526	0.084	0.938	0.356	0.759	EE_activeEnhancer	L3_repressedEnhancer	YA_repressedEnhancer
chrI	5084530	5085138	peak1527	-0.679	0.0808	0.577	0.571	EE_transcribedGeneBody	L3_transcribedGeneBody	YA_activeEnhancer
chrI	5087911	5087986	peak1528	0.112	0.981	0.418	0.82	EE_repressedEnhancer	L3_transcribedGeneBody	YA_lowSignal
chrI	5090207	5090936	peak1529	-0.014	0.991	0.355	0.747	EE_lowSignal	L3_transcribedGeneBody	YA_transcribedGeneBody
chrI	5099734	5099989	peak1530	0.313	0.36	-0.565	0.707	EE_repressedEnhancer	L3_lowSignal	YA_H3K27me3Repressed
chrI	5100641	5100913	peak1531	-0.021	0.935	0.074	0.949	EE_repressedEnhancer	L3_repressedEnhancer	YA_repressedEnhancer
chrI	5102138	5102616	peak1532	-0.285	0.544	-0.492	0.679	EE_transcribedGeneBody	L3_transcribedGeneBody	YA_transcribedGeneBody
chrI	5104816	5106286	peak1533	-0.173	0.67	-0.509	0.638	EE_promoterTSS	L3_promoterTSS	YA_promoterTSS
chrI	5118855	5119277	peak1534	0.207	0.822	0.013	0.995	EE_promoterTSS	L3_promoterTSS	YA_promoterTSS
chrI	5122641	5122822	peak1535	1.479	0.00318	0.528	0.776	EE_transcribedGeneBody	L3_transcribedGeneBody	YA_transcribedGeneBody
chrI	5124460	5125158	peak1536	-0.067	0.924	-0.347	0.771	EE_transcribedGeneBody	L3_transcribedGeneBody	YA_transcribedGeneBody
chrI	5127429	5127787	peak1537	-1.628	9.11e-06	0.039	0.98	EE_promoterTSS	L3_promoterTSS	YA_promoterTSS
chrI	5129171	5129418	peak1538	-0.861	0.0333	-0.201	0.948	EE_transcribedGeneBody	L3_transcribedGeneBody	YA_promoterTSS
chrI	5130279	5130457	peak1539	-0.401	0.435	-0.137	0.964	EE_transcribedGeneBody	L3_promoterTSS	YA_promoterTSS
chrI	5130671	5131666	peak1540	-1.387	0.00011	0.017	0.991	EE_transcribedGeneBody	L3_activeEnhancer	YA_promoterTSS
chrI	5134556	5134793	peak1541	-0.77	0.0238	-0.148	0.938	EE_activeEnhancer	L3_activeEnhancer	YA_promoterTSS
chrI	5138699	5139374	peak1542	0.163	0.731	-0.566	0.623	EE_transcribedGeneBody	L3_transcribedGeneBody	YA_transcribedGeneBody
chrI	5139525	5139765	peak1543	-0.474	0.225	0.889	0.513	EE_transcribedGeneBody	L3_activeEnhancer	YA_transcribedGeneBody
chrI	5139938	5140826	peak1544	-2.459	1.03e-11	0.744	0.445	EE_transcribedGeneBody	L3_activeEnhancer	YA_activeEnhancer
chrI	5144983	5145133	peak1545	1.969	0.00158	-1.962	0.0943	EE_lowSignal	L3_transcribedGeneBody	YA_repressedEnhancer
chrI	5158235	5158818	peak1546	-0.218	0.686	-0.974	0.285	NA	L3_lowSignal	YA_lowSignal
chrI	5159021	5159528	peak1547	0.056	0.881	-0.826	0.383	EE_transcribedGeneBody	L3_transcribedGeneBody	YA_transcribedGeneBody
chrI	5159692	5159859	peak1548	-0.121	0.886	-0.584	0.595	EE_transcribedGeneBody	L3_lowSignal	YA_transcribedGeneBody
chrI	5160070	5161047	peak1549	0.235	0.601	-0.908	0.32	EE_transcribedGeneBody	L3_promoterTSS	YA_transcribedGeneBody
chrI	5161571	5161776	peak1550	-0.072	0.962	-0.293	0.828	EE_transcribedGeneBody	L3_promoterTSS	YA_transcribedGeneBody
chrI	5164917	5165109	peak1551	-0.572	0.133	-0.139	0.917	EE_promoterTSS	L3_promoterTSS	YA_transcribedGeneBody
chrI	5165884	5166162	peak1552	0.438	0.385	-0.45	0.72	EE_transcribedGeneBody	L3_transcribedGeneBody	YA_transcribedGeneBody
chrI	5166379	5166821	peak1553	0.521	0.248	-0.556	0.654	EE_transcribedGeneBody	L3_transcribedGeneBody	YA_transcribedGeneBody
chrI	5168897	5169047	peak1554	0.649	0.152	-0.409	0.626	EE_transcribedGeneBody	L3_transcribedGeneBody	YA_transcribedGeneBody
chrI	5169555	5169967	peak1555	0.211	0.65	-0.456	0.678	EE_transcribedGeneBody	L3_transcribedGeneBody	YA_transcribedGeneBody
chrI	5181339	5181561	peak1556	1.085	0.0647	-1.101	0.439	EE_transcribedGeneBody	L3_transcribedGeneBody	YA_transcribedGeneBody
chrI	5181766	5182134	peak1557	0.183	0.618	-0.408	0.757	EE_transcribedGeneBody	L3_transcribedGeneBody	YA_transcribedGeneBody
chrI	5184636	5184835	peak1558	1.162	0.0149	-0.033	0.893	EE_activeEnhancer	L3_transcribedGeneBody	YA_transcribedGeneBody
chrI	5186751	5186967	peak1559	1.821	0.000821	0.281	0.865	EE_repressedEnhancer	L3_lowSignal	YA_repressedEnhancer
chrI	5206654	5206758	peak1560	0.66	0.192	-0.943	0.698	EE_lowSignal	L3_transcribedGeneBody	YA_repressedEnhancer
chrI	5208287	5208462	peak1561	0.094	0.961	0.602	0.476	EE_lowSignal	L3_lowSignal	YA_lowSignal
chrI	5208668	5209364	peak1562	-0.194	0.6	0.951	0.333	EE_repressedEnhancer	L3_lowSignal	YA_repressedEnhancer
chrI	5209740	5210344	peak1563	-0.669	0.0893	0.888	0.354	EE_repressedEnhancer	L3_lowSignal	YA_H3K27me3Repressed
chrI	5210608	5210780	peak1564	1.132	0.0326	0.982	0.347	EE_repressedEnhancer	L3_repressedEnhancer	YA_heterochromatin
chrI	5212166	5212584	peak1565	-0.037	0.88	1.69	0.0831	EE_repressedEnhancer	L3_lowSignal	NA
chrI	5214095	5214260	peak1566	0.852	0.0222	0.779	0.493	EE_promoterTSS	L3_repressedEnhancer	YA_H3K27me3Repressed
chrI	5214829	5215011	peak1567	0.517	0.453	0.809	0.561	EE_repressedEnhancer	L3_repressedEnhancer	YA_H3K27me3Repressed
chrI	5217264	5217439	peak1568	-0.109	0.638	0.616	0.351	EE_repressedEnhancer	L3_lowSignal	YA_heterochromatin
chrI	5218107	5218874	peak1569	1.312	0.00108	0.543	0.658	EE_repressedEnhancer	L3_lowSignal	YA_H3K27me3Repressed
chrI	5219054	5219614	peak1570	1.684	2.59e-05	-0.018	0.924	EE_repressedEnhancer	L3_lowSignal	YA_heterochromatin
chrI	5219888	5220428	peak1571	1.248	0.00187	0.804	0.602	EE_repressedEnhancer	L3_lowSignal	YA_heterochromatin
chrI	5220628	5221111	peak1572	1.299	0.0015	0.195	0.93	EE_repressedEnhancer	L3_repressedEnhancer	YA_lowSignal
chrI	5223685	5223972	peak1573	-0.885	0.0276	1.088	0.388	EE_repressedEnhancer	L3_repressedEnhancer	YA_repressedEnhancer
chrI	5226324	5226628	peak1574	-0.504	0.266	0.506	0.663	EE_repressedEnhancer	L3_repressedEnhancer	YA_H3K27me3Repressed
chrI	5227529	5227698	peak1575	3.172	1.85e-07	0.272	0.507	EE_repressedEnhancer	L3_lowSignal	YA_lowSignal
chrI	5228343	5228516	peak1576	2.295	0.000361	-0.736	0.737	EE_repressedEnhancer	L3_repressedEnhancer	YA_repressedEnhancer
chrI	5229161	5229484	peak1577	1.227	0.00719	-0.47	0.838	EE_repressedEnhancer	L3_lowSignal	YA_H3K27me3Repressed
chrI	5236947	5237268	peak1578	0.658	0.143	-0.485	0.686	EE_H3K27me3Repressed	L3_lowSignal	YA_H3K27me3Repressed
chrI	5243207	5243524	peak1579	-1.06	0.0068	1.608	0.0654	EE_repressedEnhancer	L3_lowSignal	YA_repressedEnhancer
chrI	5255535	5255741	peak1580	0.235	0.686	-1.252	0.263	EE_transcribedGeneBody	L3_transcribedGeneBody	YA_transcribedGeneBody
chrI	5256380	5256572	peak1581	-0.206	0.741	-0.517	0.721	EE_transcribedGeneBody	L3_transcribedGeneBody	YA_transcribedGeneBody
chrI	5261141	5261883	peak1582	-0.516	0.189	0.692	0.504	EE_transcribedGeneBody	L3_transcribedGeneBody	YA_transcribedGeneBody
chrI	5268610	5268790	peak1583	1.487	0.00187	-1.512	0.0658	EE_lowSignal	L3_lowSignal	YA_lowSignal
chrI	5268960	5269115	peak1584	1.58	0.0172	-1.91	0.0652	EE_repressedEnhancer	L3_lowSignal	YA_repressedEnhancer
chrI	5269944	5270897	peak1585	-0.036	0.973	-0.635	0.548	EE_transcribedGeneBody	L3_lowSignal	YA_transcribedGeneBody
chrI	5272002	5272289	peak1586	0.538	0.242	-0.651	0.546	EE_promoterTSS	L3_transcribedGeneBody	YA_transcribedGeneBody
chrI	5272550	5272998	peak1587	-0.888	0.016	0.32	0.81	EE_activeEnhancer	L3_activeEnhancer	YA_lowSignal
chrI	5273506	5273645	peak1588	0.383	0.591	-0.915	0.436	EE_transcribedGeneBody	L3_lowSignal	YA_transcribedGeneBody
chrI	5289171	5289229	peak1589	-0.106	0.934	0.366	0.851	EE_transcribedGeneBody	L3_transcribedGeneBody	YA_transcribedGeneBody
chrI	5292742	5292971	peak1590	0.44	0.495	0.704	0.684	EE_transcribedGeneBody	L3_transcribedGeneBody	YA_transcribedGeneBody
chrI	5294445	5294857	peak1591	-1.402	0.000149	0.12	0.934	EE_repressedEnhancer	L3_activeEnhancer	YA_activeEnhancer
chrI	5295651	5295872	peak1592	0.494	0.363	0.124	0.898	EE_repressedEnhancer	L3_transcribedGeneBody	YA_activeEnhancer
chrI	5296513	5296763	peak1593	0.033	0.835	0.901	0.448	EE_repressedEnhancer	L3_repressedEnhancer	YA_activeEnhancer
chrI	5299119	5300088	peak1594	-0.249	0.599	-0.183	0.888	EE_transcribedGeneBody	L3_lowSignal	YA_transcribedGeneBody
chrI	5305345	5306413	peak1595	-0.843	0.0268	-0.312	0.796	EE_transcribedGeneBody	L3_transcribedGeneBody	YA_transcribedGeneBody
chrI	5307079	5307335	peak1596	-1.221	0.00119	0.12	0.929	EE_transcribedGeneBody	L3_transcribedGeneBody	YA_activeEnhancer
chrI	5307458	5307703	peak1597	-1.795	1.27e-06	1.035	0.288	EE_transcribedGeneBody	L3_transcribedGeneBody	YA_transcribedGeneBody
chrI	5308136	5308673	peak1598	-1.74	1.53e-06	0.445	0.695	EE_transcribedGeneBody	L3_transcribedGeneBody	YA_activeEnhancer
chrI	5311788	5311982	peak1599	-1.557	2.24e-05	0.724	0.476	EE_activeEnhancer	L3_activeEnhancer	YA_activeEnhancer
chrI	5312796	5313515	peak1600	-1.979	2.46e-08	0.42	0.702	EE_promoterTSS	L3_transcribedGeneBody	YA_activeEnhancer
chrI	5315868	5317002	peak1601	-2.102	3.07e-09	0.735	0.443	EE_promoterTSS	L3_activeEnhancer	YA_activeEnhancer
chrI	5316798	5317075	peak1602	-2.102	3.07e-09	0.735	0.443	EE_promoterTSS	L3_activeEnhancer	YA_activeEnhancer
chrI	5332005	5332200	peak1603	0.569	0.14	-0.126	0.733	EE_lowSignal	L3_lowSignal	YA_lowSignal
chrI	5334155	5334503	peak1604	0.386	0.374	-0.766	0.523	EE_lowSignal	L3_lowSignal	YA_H3K27me3Repressed
chrI	5334886	5335036	peak1605	-0.082	0.872	0.647	0.679	EE_lowSignal	L3_lowSignal	YA_lowSignal
chrI	5341270	5341554	peak1606	0.575	0.183	0.657	0.75	EE_H3K27me3Repressed	L3_lowSignal	YA_H3K27me3Repressed
chrI	5341661	5342009	peak1607	0.278	0.536	-0.017	0.988	EE_H3K27me3Repressed	L3_lowSignal	NA
chrI	5344378	5344541	peak1608	-0.203	0.342	-0.098	0.968	EE_promoterTSS	L3_promoterTSS	YA_promoterTSS
chrI	5345112	5345686	peak1609	-1.91	1.24e-07	0.424	0.712	EE_activeEnhancer	L3_promoterTSS	YA_promoterTSS
chrI	5351354	5351685	peak1610	-0.698	0.129	0.293	0.888	EE_transcribedGeneBody	L3_transcribedGeneBody	YA_transcribedGeneBody
chrI	5353847	5354344	peak1611	-1.048	0.00526	0.081	0.962	EE_repressedEnhancer	NA	YA_lowSignal
chrI	5357384	5357785	peak1612	-1.612	1.07e-05	0.824	0.443	NA	L3_promoterTSS	YA_promoterTSS
chrI	5358075	5358406	peak1613	0.02	0.904	-0.472	0.706	EE_promoterTSS	L3_promoterTSS	YA_promoterTSS
chrI	5364507	5364709	peak1614	1.728	0.00388	-1.754	0.209	EE_transcribedGeneBody	L3_transcribedGeneBody	YA_transcribedGeneBody
chrI	5365821	5365994	peak1615	-0.037	0.971	0.752	0.706	EE_transcribedGeneBody	L3_transcribedGeneBody	YA_transcribedGeneBody
chrI	5370140	5370345	peak1616	-0.307	0.567	-0.773	0.501	EE_transcribedGeneBody	L3_lowSignal	YA_transcribedGeneBody
chrI	5371266	5371554	peak1617	-0.459	0.342	-0.235	0.866	EE_transcribedGeneBody	L3_lowSignal	YA_transcribedGeneBody
chrI	5371962	5372367	peak1618	-0.986	0.0127	0.169	0.913	EE_transcribedGeneBody	L3_lowSignal	YA_transcribedGeneBody
chrI	5372666	5372845	peak1619	-0.126	0.564	-0.307	0.882	EE_lowSignal	L3_lowSignal	YA_lowSignal
chrI	5375421	5375819	peak1620	-1.056	0.00456	0.586	0.598	EE_repressedEnhancer	L3_activeEnhancer	YA_activeEnhancer
chrI	5377381	5377955	peak1621	-1.264	0.000509	0.413	0.708	EE_activeEnhancer	L3_activeEnhancer	YA_activeEnhancer
chrI	5379776	5380036	peak1622	-1.031	0.00414	0.249	0.818	EE_activeEnhancer	L3_activeEnhancer	YA_activeEnhancer
chrI	5381409	5381705	peak1623	-0.559	0.203	0.991	0.329	EE_lowSignal	L3_activeEnhancer	YA_repressedEnhancer
chrI	5386901	5387083	peak1624	-1.17	0.00287	0.392	0.74	EE_lowSignal	L3_transcribedGeneBody	YA_activeEnhancer
chrI	5387913	5388454	peak1625	-0.584	0.164	0.911	0.388	EE_lowSignal	L3_transcribedGeneBody	YA_activeEnhancer
chrI	5388921	5389415	peak1626	-1.216	0.00112	0.512	0.62	EE_repressedEnhancer	L3_lowSignal	YA_lowSignal
chrI	5389547	5390175	peak1627	-0.145	0.747	0.254	0.872	EE_lowSignal	L3_heterochromatin	YA_lowSignal
chrI	5391019	5391306	peak1628	-0.692	0.111	0.041	0.949	EE_lowSignal	NA	YA_repressedEnhancer
chrI	5393967	5394150	peak1629	-0.392	0.268	1.181	0.326	EE_lowSignal	L3_repressedEnhancer	YA_repressedEnhancer
chrI	5402259	5402851	peak1630	0.169	0.709	-0.355	0.748	EE_transcribedGeneBody	L3_lowSignal	YA_transcribedGeneBody
chrI	5409552	5409901	peak1631	-0.908	0.0168	0.595	0.562	EE_activeEnhancer	L3_activeEnhancer	YA_activeEnhancer
chrI	5410265	5410393	peak1632	-0.993	0.0137	1.216	0.342	EE_transcribedGeneBody	L3_activeEnhancer	YA_activeEnhancer
chrI	5411371	5411577	peak1633	-0.895	0.0143	0.481	0.729	EE_activeEnhancer	L3_activeEnhancer	YA_activeEnhancer
chrI	5412484	5412848	peak1634	-2.14	1.17e-08	0.494	0.681	EE_transcribedGeneBody	L3_activeEnhancer	YA_activeEnhancer
chrI	5416229	5416487	peak1635	-0.674	0.0292	0.405	0.806	EE_activeEnhancer	L3_activeEnhancer	YA_activeEnhancer
chrI	5420365	5420733	peak1636	-1.728	2.65e-06	0.427	0.694	EE_activeEnhancer	L3_activeEnhancer	YA_promoterTSS
chrI	5422112	5423063	peak1637	-0.101	0.826	0.643	0.529	EE_promoterTSS	L3_transcribedGeneBody	YA_activeEnhancer
chrI	5423873	5424033	peak1638	3.07	1.7e-08	-0.102	0.975	EE_activeEnhancer	L3_transcribedGeneBody	YA_transcribedGeneBody
chrI	5424178	5424412	peak1639	1.649	0.000151	-0.5	0.816	EE_activeEnhancer	L3_transcribedGeneBody	YA_transcribedGeneBody
chrI	5424571	5424778	peak1640	0.706	0.161	-0.71	0.652	EE_transcribedGeneBody	L3_transcribedGeneBody	YA_transcribedGeneBody
chrI	5425175	5425325	peak1641	0.835	0.123	0.105	0.98	EE_transcribedGeneBody	L3_transcribedGeneBody	YA_transcribedGeneBody
chrI	5427073	5427202	peak1642	0.289	0.655	-0.681	0.608	EE_transcribedGeneBody	L3_transcribedGeneBody	YA_transcribedGeneBody
chrI	5429323	5429643	peak1643	-0.624	0.146	0.355	0.841	EE_promoterTSS	L3_promoterTSS	YA_promoterTSS
chrI	5429809	5430257	peak1644	-1.137	0.00272	-0.068	0.949	EE_promoterTSS	L3_promoterTSS	YA_promoterTSS
chrI	5430712	5430894	peak1645	-0.432	0.481	-0.137	0.978	EE_transcribedGeneBody	L3_promoterTSS	YA_promoterTSS
chrI	5432126	5433065	peak1646	-1.405	0.000141	0.46	0.673	EE_H3K27me3Repressed	L3_promoterTSS	YA_H3K27me3Repressed
chrI	5433070	5433320	peak1647	-1.912	1.6e-06	2.248	0.0109	EE_lowSignal	L3_lowSignal	YA_lowSignal
chrI	5470224	5470403	peak1648	1.642	0.00677	-1.641	0.116	EE_H3K27me3Repressed	L3_lowSignal	YA_transcribedGeneBody
chrI	5484366	5485593	peak1649	-0.127	0.772	-0.628	0.545	EE_promoterTSS	L3_promoterTSS	YA_promoterTSS
chrI	5485879	5486141	peak1650	-0.722	0.063	0.087	0.999	EE_promoterTSS	L3_promoterTSS	YA_activeEnhancer
chrI	5489455	5489849	peak1651	0.384	0.424	-0.006	0.992	EE_lowSignal	L3_lowSignal	YA_H3K27me3Repressed
chrI	5498838	5499043	peak1652	0.692	0.185	-1.418	0.22	EE_repressedEnhancer	L3_repressedEnhancer	YA_repressedEnhancer
chrI	5500722	5501100	peak1653	-0.793	0.0473	0.507	0.625	EE_lowSignal	L3_lowSignal	YA_repressedEnhancer
chrI	5503530	5503680	peak1654	0.353	0.816	0.234	0.917	EE_repressedEnhancer	L3_lowSignal	YA_transcribedGeneBody
chrI	5508501	5508670	peak1655	0.918	0.187	-1.257	0.302	EE_transcribedGeneBody	L3_transcribedGeneBody	YA_transcribedGeneBody
chrI	5509246	5509502	peak1656	-1.059	0.00602	0.003	0.997	EE_promoterTSS	L3_promoterTSS	YA_promoterTSS
chrI	5511654	5512000	peak1657	-0.124	0.21	-1.836	0.0597	EE_transcribedGeneBody	L3_promoterTSS	YA_promoterTSS
chrI	5514045	5514195	peak1658	0.412	0.503	-1.082	0.428	EE_transcribedGeneBody	L3_transcribedGeneBody	YA_transcribedGeneBody
chrI	5517411	5517846	peak1659	0.837	0.0613	-0.552	0.671	EE_repressedEnhancer	L3_lowSignal	YA_repressedEnhancer
chrI	5518736	5519069	peak1660	-0.318	0.23	0.279	0.851	EE_repressedEnhancer	NA	YA_repressedEnhancer
chrI	5519655	5519893	peak1661	-0.638	0.0583	0.254	0.845	EE_transcribedGeneBody	L3_promoterTSS	YA_activeEnhancer
chrI	5523897	5524122	peak1662	-0.338	0.596	0.036	0.928	EE_lowSignal	L3_transcribedGeneBody	YA_heterochromatin
chrI	5524943	5525160	peak1663	-0.143	0.938	0.631	0.722	EE_lowSignal	L3_transcribedGeneBody	YA_heterochromatin
chrI	5533450	5533759	peak1664	0.565	0.129	-0.028	0.975	EE_promoterTSS	L3_lowSignal	YA_lowSignal
chrI	5533777	5534240	peak1665	1.66	1.26e-05	-0.151	0.923	EE_activeEnhancer	L3_lowSignal	YA_H3K27me3Repressed
chrI	5535009	5535288	peak1666	2.268	7.06e-06	-0.614	0.569	EE_activeEnhancer	L3_lowSignal	YA_lowSignal
chrI	5536976	5537244	peak1667	-0.49	0.249	1.319	0.263	EE_lowSignal	L3_lowSignal	YA_lowSignal
chrI	5540587	5541037	peak1668	-1.527	3.41e-05	0.875	0.373	EE_lowSignal	L3_activeEnhancer	YA_lowSignal
chrI	5543884	5544352	peak1669	-1.426	0.00014	0.983	0.312	EE_repressedEnhancer	L3_activeEnhancer	YA_activeEnhancer
chrI	5545224	5545343	peak1670	-0.293	0.318	-0.349	0.973	EE_lowSignal	L3_activeEnhancer	YA_repressedEnhancer
chrI	5545524	5545867	peak1671	-1.451	6.49e-05	0.587	0.603	EE_repressedEnhancer	L3_transcribedGeneBody	YA_lowSignal
chrI	5550517	5550757	peak1672	-0.434	0.261	0.14	0.903	EE_promoterTSS	L3_activeEnhancer	YA_lowSignal
chrI	5552638	5552883	peak1673	0.279	0.49	0.145	0.823	EE_lowSignal	L3_transcribedGeneBody	YA_lowSignal
chrI	5568926	5569192	peak1674	0.802	0.111	-1.008	0.378	EE_lowSignal	L3_transcribedGeneBody	YA_transcribedGeneBody
chrI	5570350	5570610	peak1675	-0.913	0.0166	0.051	0.954	EE_repressedEnhancer	L3_promoterTSS	YA_activeEnhancer
chrI	5571843	5572756	peak1676	0.113	0.814	-0.96	0.302	EE_transcribedGeneBody	L3_promoterTSS	YA_transcribedGeneBody
chrI	5572819	5573162	peak1677	0.047	0.945	-1.565	0.0709	EE_transcribedGeneBody	L3_promoterTSS	YA_transcribedGeneBody
chrI	5576788	5577036	peak1678	1.024	0.0483	-2.174	0.00758	EE_transcribedGeneBody	L3_lowSignal	YA_transcribedGeneBody
chrI	5577043	5577569	peak1679	-0.4	0.397	-0.693	0.507	EE_transcribedGeneBody	L3_transcribedGeneBody	YA_transcribedGeneBody
chrI	5578329	5578884	peak1680	-0.018	0.988	-1.161	0.206	EE_transcribedGeneBody	L3_promoterTSS	YA_promoterTSS
chrI	5579069	5579610	peak1681	-0.489	0.223	-0.745	0.478	NA	L3_promoterTSS	YA_lowSignal
chrI	5580040	5580273	peak1682	-0.262	0.756	0.271	0.936	EE_transcribedGeneBody	L3_transcribedGeneBody	YA_transcribedGeneBody
chrI	5589415	5589913	peak1683	-1.835	4.49e-07	0.775	0.434	EE_repressedEnhancer	L3_transcribedGeneBody	YA_transcribedGeneBody
chrI	5589952	5590253	peak1684	-0.304	0.414	0.806	0.429	EE_lowSignal	L3_activeEnhancer	YA_transcribedGeneBody
chrI	5590776	5590944	peak1685	0.51	0.291	-0.012	0.919	EE_repressedEnhancer	L3_transcribedGeneBody	YA_transcribedGeneBody
chrI	5591537	5591912	peak1686	0.306	0.512	0.26	0.808	EE_repressedEnhancer	L3_transcribedGeneBody	YA_transcribedGeneBody
chrI	5599339	5599879	peak1687	-2.046	1.8e-08	0.803	0.403	EE_lowSignal	L3_transcribedGeneBody	YA_lowSignal
chrI	5606736	5607045	peak1688	1.252	0.0154	-0.725	0.494	EE_repressedEnhancer	L3_repressedEnhancer	YA_repressedEnhancer
chrI	5610536	5610908	peak1689	-0.428	0.255	0.734	0.513	EE_promoterTSS	L3_promoterTSS	YA_activeEnhancer
chrI	5611604	5611976	peak1690	0.261	0.513	-0.149	0.883	EE_transcribedGeneBody	L3_transcribedGeneBody	YA_transcribedGeneBody
chrI	5618302	5618777	peak1691	-2.356	1.07e-10	0.45	0.69	EE_promoterTSS	L3_activeEnhancer	YA_promoterTSS
chrI	5619240	5619447	peak1692	-0.874	0.033	-1.795	0.0321	EE_transcribedGeneBody	L3_activeEnhancer	YA_promoterTSS
chrI	5619716	5620330	peak1693	-0.568	0.153	-1.092	0.213	EE_transcribedGeneBody	L3_promoterTSS	YA_promoterTSS
chrI	5620330	5621064	peak1694	-0.568	0.153	-1.092	0.213	EE_transcribedGeneBody	L3_promoterTSS	NA
chrI	5622548	5622938	peak1695	1.241	0.00683	-1.521	0.0798	EE_transcribedGeneBody	L3_transcribedGeneBody	YA_transcribedGeneBody
chrI	5626070	5626259	peak1696	0.15	0.942	-0.869	0.408	EE_transcribedGeneBody	L3_activeEnhancer	YA_activeEnhancer
chrI	5626434	5626906	peak1697	-0.059	0.768	-0.12	0.981	EE_activeEnhancer	L3_activeEnhancer	YA_activeEnhancer
chrI	5634261	5634448	peak1698	1.333	0.0078	-0.161	0.889	EE_lowSignal	L3_transcribedGeneBody	YA_transcribedGeneBody
chrI	5638747	5639614	peak1699	-1.259	0.000766	-0.105	0.938	NA	NA	YA_lowSignal
chrI	5642836	5643049	peak1700	4.056	1.14e-11	-2.451	0.0278	EE_repressedEnhancer	L3_lowSignal	YA_H3K27me3Repressed
chrI	5645280	5645704	peak1701	1.23	0.00615	-1.049	0.312	EE_lowSignal	L3_lowSignal	YA_lowSignal
chrI	5645915	5646126	peak1702	2.26	0.000326	-1.12	0.529	EE_repressedEnhancer	L3_lowSignal	YA_transcribedGeneBody
chrI	5651830	5652072	peak1703	1.046	0.024	-0.844	0.354	EE_transcribedGeneBody	L3_transcribedGeneBody	YA_transcribedGeneBody
chrI	5654124	5654473	peak1704	0.895	0.244	-1.687	0.107	EE_transcribedGeneBody	L3_transcribedGeneBody	YA_transcribedGeneBody
chrI	5658217	5658550	peak1705	0.072	0.956	0.313	0.81	EE_transcribedGeneBody	L3_transcribedGeneBody	YA_promoterTSS
chrI	5661962	5662272	peak1706	-0.178	0.631	1.727	0.0648	EE_repressedEnhancer	L3_repressedEnhancer	YA_repressedEnhancer
chrI	5673664	5673873	peak1707	-0.375	0.406	0.564	0.75	EE_promoterTSS	L3_promoterTSS	YA_promoterTSS
chrI	5679271	5679460	peak1708	0.826	0.278	-1.132	0.416	EE_transcribedGeneBody	L3_transcribedGeneBody	YA_transcribedGeneBody
chrI	5680879	5681243	peak1709	0.8	0.0993	-0.691	0.602	EE_transcribedGeneBody	L3_transcribedGeneBody	YA_transcribedGeneBody
chrI	5682331	5682844	peak1710	-0.093	0.87	0.134	0.95	EE_transcribedGeneBody	L3_transcribedGeneBody	YA_transcribedGeneBody
chrI	5682980	5683376	peak1711	0.16	0.679	-0.319	0.817	EE_transcribedGeneBody	L3_transcribedGeneBody	YA_transcribedGeneBody
chrI	5687458	5688281	peak1712	0.417	0.322	0.606	0.597	EE_activeEnhancer	L3_transcribedGeneBody	YA_transcribedGeneBody
chrI	5690164	5690498	peak1713	-1.204	0.00116	0.857	0.365	EE_transcribedGeneBody	L3_activeEnhancer	YA_transcribedGeneBody
chrI	5691597	5691892	peak1714	-1.219	0.00102	-0.277	0.826	EE_promoterTSS	L3_promoterTSS	YA_promoterTSS
chrI	5693172	5693374	peak1715	0.246	0.481	-0.84	0.503	EE_transcribedGeneBody	L3_transcribedGeneBody	YA_transcribedGeneBody
chrI	5694810	5695227	peak1716	-0.406	0.385	-0.037	0.971	EE_transcribedGeneBody	L3_transcribedGeneBody	YA_transcribedGeneBody
chrI	5696045	5696261	peak1717	-0.188	0.777	-0.547	0.658	EE_transcribedGeneBody	L3_transcribedGeneBody	YA_transcribedGeneBody
chrI	5696851	5697028	peak1718	-0.065	0.8	0.755	0.643	EE_transcribedGeneBody	L3_transcribedGeneBody	YA_transcribedGeneBody
chrI	5698833	5699316	peak1719	-1.23	0.000677	0.718	0.47	EE_activeEnhancer	L3_activeEnhancer	YA_activeEnhancer
chrI	5706802	5707710	peak1720	-0.722	0.0491	0.049	0.973	EE_repressedEnhancer	L3_repressedEnhancer	YA_repressedEnhancer
chrI	5710578	5710811	peak1721	1.99	0.000434	-1.441	0.414	EE_repressedEnhancer	L3_lowSignal	YA_lowSignal
chrI	5716375	5716695	peak1722	0.422	0.32	0.666	0.664	EE_repressedEnhancer	L3_lowSignal	YA_H3K27me3Repressed
chrI	5719369	5719651	peak1723	1.579	3.95e-05	0.286	0.997	EE_repressedEnhancer	L3_lowSignal	YA_H3K27me3Repressed
chrI	5722288	5722514	peak1724	1.166	0.0101	-0.104	0.809	EE_repressedEnhancer	L3_repressedEnhancer	YA_H3K27me3Repressed
chrI	5723572	5724025	peak1725	3.41	1.86e-10	-1.642	0.156	EE_repressedEnhancer	L3_lowSignal	YA_H3K27me3Repressed
chrI	5742064	5742273	peak1726	-0.006	0.953	-0.824	0.625	EE_transcribedGeneBody	L3_transcribedGeneBody	YA_transcribedGeneBody
chrI	5743098	5743393	peak1727	0.477	0.287	-0.965	0.359	EE_transcribedGeneBody	L3_transcribedGeneBody	YA_transcribedGeneBody
chrI	5743987	5744167	peak1728	-0.473	0.141	0.13	0.946	EE_promoterTSS	L3_promoterTSS	YA_promoterTSS
chrI	5744425	5744628	peak1729	0.66	0.332	-0.097	0.883	EE_promoterTSS	L3_promoterTSS	YA_transcribedGeneBody
chrI	5744828	5745002	peak1730	0.589	0.21	-0.27	0.676	EE_transcribedGeneBody	L3_transcribedGeneBody	YA_transcribedGeneBody
chrI	5746430	5746834	peak1731	-0.242	0.569	1.709	0.0744	EE_repressedEnhancer	L3_lowSignal	YA_lowSignal
chrI	5752558	5752789	peak1732	0.241	0.659	0.66	0.725	EE_lowSignal	L3_lowSignal	YA_H3K27me3Repressed
chrI	5768618	5769093	peak1733	-1.422	0.000102	0.423	0.693	NA	L3_activeEnhancer	YA_H3K27me3Repressed
chrI	5773651	5773897	peak1734	0.081	0.918	1.008	0.487	EE_lowSignal	L3_repressedEnhancer	YA_H3K27me3Repressed
chrI	5774398	5775594	peak1735	-0.009	0.996	-0.786	0.422	EE_repressedEnhancer	L3_promoterTSS	YA_H3K27me3Repressed
chrI	5775778	5776194	peak1736	-0.949	0.0146	1.336	0.146	EE_repressedEnhancer	L3_lowSignal	YA_heterochromatin
chrI	5776837	5777630	peak1737	-0.493	0.207	0.59	0.586	EE_repressedEnhancer	L3_lowSignal	YA_H3K27me3Repressed
chrI	5778437	5778616	peak1738	1.751	0.0022	-0.353	0.988	EE_repressedEnhancer	L3_lowSignal	YA_H3K27me3Repressed
chrI	5780857	5781284	peak1739	0.322	0.49	-0.255	0.893	EE_repressedEnhancer	L3_lowSignal	YA_H3K27me3Repressed
chrI	5785231	5785443	peak1740	1.174	0.0542	-0.905	0.567	EE_repressedEnhancer	L3_lowSignal	YA_repressedEnhancer
chrI	5789172	5789273	peak1741	0.829	0.326	-0.904	0.671	EE_transcribedGeneBody	L3_lowSignal	YA_transcribedGeneBody
chrI	5790871	5791159	peak1742	-0.421	0.597	-0.05	0.931	EE_transcribedGeneBody	L3_lowSignal	YA_transcribedGeneBody
chrI	5791418	5791581	peak1743	0.522	0.211	-1.851	0.0935	EE_transcribedGeneBody	L3_promoterTSS	YA_transcribedGeneBody
chrI	5793858	5794008	peak1744	1.117	0.122	-1.445	0.329	EE_transcribedGeneBody	L3_transcribedGeneBody	YA_transcribedGeneBody
chrI	5795908	5796234	peak1745	0.936	0.0473	-0.985	0.379	EE_transcribedGeneBody	L3_transcribedGeneBody	YA_transcribedGeneBody
chrI	5807172	5807661	peak1746	-0.975	0.00775	-0.516	0.682	EE_promoterTSS	L3_promoterTSS	YA_promoterTSS
chrI	5808325	5808666	peak1747	0.677	0.279	-0.623	0.659	EE_promoterTSS	L3_transcribedGeneBody	YA_promoterTSS
chrI	5809005	5809275	peak1748	1.032	0.0657	-0.642	0.531	EE_transcribedGeneBody	L3_transcribedGeneBody	YA_activeEnhancer
chrI	5809917	5810353	peak1749	-0.939	0.0117	0.134	0.93	EE_transcribedGeneBody	L3_transcribedGeneBody	YA_activeEnhancer
chrI	5813935	5814095	peak1750	0.646	0.187	0.312	0.948	EE_transcribedGeneBody	L3_transcribedGeneBody	YA_transcribedGeneBody
chrI	5815796	5816060	peak1751	0.993	0.0566	-1.771	0.0896	EE_transcribedGeneBody	L3_lowSignal	YA_transcribedGeneBody
chrI	5817310	5817567	peak1752	0.484	0.269	0.34	0.931	EE_transcribedGeneBody	L3_lowSignal	YA_transcribedGeneBody
chrI	5818198	5818367	peak1753	0.059	0.755	-0.764	0.443	EE_activeEnhancer	L3_lowSignal	YA_lowSignal
chrI	5820415	5820873	peak1754	2.016	6.2e-08	-0.901	0.382	EE_promoterTSS	L3_lowSignal	YA_H3K27me3Repressed
chrI	5821107	5821588	peak1755	2.587	3.05e-11	-0.498	0.686	EE_activeEnhancer	L3_lowSignal	YA_H3K27me3Repressed
chrI	5821921	5822223	peak1756	2.536	5.31e-10	-0.756	0.584	EE_activeEnhancer	L3_lowSignal	YA_lowSignal
chrI	5822577	5823011	peak1757	1.303	0.00038	-0.229	0.88	EE_activeEnhancer	L3_lowSignal	YA_transcribedGeneBody
chrI	5823412	5823724	peak1758	1.285	0.00255	-0.995	0.376	EE_transcribedGeneBody	L3_transcribedGeneBody	YA_transcribedGeneBody
chrI	5826503	5826851	peak1759	-0.714	0.0577	0.413	0.776	EE_transcribedGeneBody	L3_activeEnhancer	YA_promoterTSS
chrI	5827778	5828003	peak1760	-0.898	0.0491	-1.382	0.117	EE_activeEnhancer	L3_activeEnhancer	YA_promoterTSS
chrI	5828827	5829185	peak1761	0.042	0.97	0.086	0.943	EE_activeEnhancer	L3_activeEnhancer	YA_promoterTSS
chrI	5835304	5835668	peak1762	0.296	0.505	-0.583	0.646	EE_lowSignal	L3_lowSignal	YA_H3K27me3Repressed
chrI	5842924	5843314	peak1763	-1.149	0.00173	-0.234	0.862	EE_lowSignal	L3_lowSignal	YA_repressedEnhancer
chrI	5854753	5855002	peak1764	-1.458	0.000184	-0.123	0.9	EE_lowSignal	L3_lowSignal	YA_repressedEnhancer
chrI	5858585	5858864	peak1765	2.002	0.000716	-1.142	0.406	EE_transcribedGeneBody	L3_lowSignal	YA_transcribedGeneBody
chrI	5865878	5866275	peak1766	-1.562	1.62e-05	0.822	0.397	EE_activeEnhancer	L3_activeEnhancer	YA_activeEnhancer
chrI	5870464	5871080	peak1767	-1.372	0.000136	0.478	0.657	EE_promoterTSS	L3_promoterTSS	YA_promoterTSS
chrI	5871200	5871618	peak1768	-1.154	0.00188	0.884	0.368	EE_promoterTSS	L3_promoterTSS	YA_promoterTSS
chrI	5877232	5877408	peak1769	-0.115	0.825	0.224	0.893	EE_transcribedGeneBody	L3_promoterTSS	YA_heterochromatin
chrI	5878167	5878294	peak1770	-0.009	0.957	0.659	0.427	EE_promoterTSS	L3_promoterTSS	YA_heterochromatin
chrI	5879386	5879783	peak1771	-0.66	0.0942	1.553	0.048	EE_activeEnhancer	L3_promoterTSS	YA_H3K27me3Repressed
chrI	5879956	5880277	peak1772	-0.093	0.893	0.4	0.716	EE_activeEnhancer	L3_promoterTSS	YA_heterochromatin
chrI	5882067	5882422	peak1773	-1.425	0.000161	1.971	0.0211	EE_repressedEnhancer	L3_lowSignal	YA_H3K27me3Repressed
chrI	5883849	5884217	peak1774	-0.324	0.466	1.314	0.161	EE_repressedEnhancer	L3_lowSignal	YA_lowSignal
chrI	5885338	5885611	peak1775	-0.383	0.279	-0.345	0.812	EE_lowSignal	L3_lowSignal	YA_lowSignal
chrI	5888260	5888677	peak1776	-1.792	1.44e-06	0.754	0.45	EE_lowSignal	L3_transcribedGeneBody	YA_repressedEnhancer
chrI	5897563	5897764	peak1777	-0.769	0.0407	0.206	0.801	EE_lowSignal	L3_lowSignal	YA_lowSignal
chrI	5900572	5900902	peak1778	-0.029	0.982	0.154	0.938	EE_repressedEnhancer	L3_lowSignal	YA_H3K27me3Repressed
chrI	5901269	5901481	peak1779	1.787	0.00385	-1.276	0.284	EE_lowSignal	L3_lowSignal	YA_H3K27me3Repressed
chrI	5901719	5902016	peak1780	1.483	0.00815	-1.606	0.157	EE_lowSignal	L3_transcribedGeneBody	YA_transcribedGeneBody
chrI	5902191	5902876	peak1781	-0.105	0.903	-0.078	0.982	EE_transcribedGeneBody	L3_transcribedGeneBody	YA_transcribedGeneBody
chrI	5904316	5904560	peak1782	-0.557	0.152	-0.145	0.907	EE_promoterTSS	L3_promoterTSS	YA_promoterTSS
chrI	5910163	5910330	peak1783	1.441	0.00982	-1.432	0.285	EE_transcribedGeneBody	L3_transcribedGeneBody	YA_transcribedGeneBody
chrI	5910771	5911029	peak1784	2.214	3.84e-05	-0.896	0.455	EE_transcribedGeneBody	L3_transcribedGeneBody	YA_transcribedGeneBody
chrI	5916973	5917198	peak1785	0.651	0.198	0.051	0.968	EE_transcribedGeneBody	L3_transcribedGeneBody	YA_transcribedGeneBody
chrI	5922054	5922364	peak1786	1.846	0.000153	-0.521	0.677	EE_lowSignal	L3_lowSignal	YA_H3K27me3Repressed
chrI	5927085	5928214	peak1787	1.328	0.000546	-0.256	0.855	EE_lowSignal	L3_lowSignal	YA_lowSignal
chrI	5936176	5936363	peak1788	0.607	0.149	0.176	0.986	EE_transcribedGeneBody	L3_transcribedGeneBody	YA_transcribedGeneBody
chrI	5937004	5937260	peak1789	-0.616	0.111	0.45	0.816	EE_promoterTSS	L3_promoterTSS	YA_promoterTSS
chrI	5938154	5938588	peak1790	0.923	0.0292	-1.174	0.295	EE_transcribedGeneBody	L3_transcribedGeneBody	YA_transcribedGeneBody
chrI	5943227	5943498	peak1791	0.639	0.0903	-0.146	0.898	EE_H3K27me3Repressed	L3_lowSignal	YA_H3K27me3Repressed
chrI	5965376	5965786	peak1792	0.711	0.119	-0.248	0.856	EE_lowSignal	L3_lowSignal	YA_H3K27me3Repressed
chrI	5970047	5970266	peak1793	0.886	0.0377	-0.322	0.759	EE_lowSignal	L3_lowSignal	YA_lowSignal
chrI	5973556	5973996	peak1794	-1.504	4.6e-05	0.563	0.577	EE_lowSignal	L3_activeEnhancer	YA_repressedEnhancer
chrI	5978449	5978665	peak1795	-0.721	0.0714	-0.094	0.986	EE_repressedEnhancer	L3_repressedEnhancer	YA_transcribedGeneBody
chrI	5983915	5984103	peak1796	0.191	0.648	-0.427	0.729	EE_transcribedGeneBody	L3_lowSignal	YA_transcribedGeneBody
chrI	5984287	5984637	peak1797	-0.152	0.782	-0.395	0.724	EE_transcribedGeneBody	L3_transcribedGeneBody	YA_transcribedGeneBody
chrI	5984992	5985724	peak1798	-0.344	0.462	-0.501	0.63	EE_transcribedGeneBody	L3_lowSignal	YA_transcribedGeneBody
chrI	5988765	5988937	peak1799	1.088	0.0426	-1.301	0.315	EE_transcribedGeneBody	L3_transcribedGeneBody	YA_transcribedGeneBody
chrI	5991859	5992057	peak1800	0.958	0.0384	0.098	0.942	EE_transcribedGeneBody	L3_transcribedGeneBody	YA_transcribedGeneBody
chrI	5996547	5997166	peak1801	-0.663	0.0837	0.459	0.674	EE_transcribedGeneBody	L3_activeEnhancer	YA_promoterTSS
chrI	5997351	5997813	peak1802	-2.312	2.06e-10	0.68	0.492	EE_transcribedGeneBody	L3_activeEnhancer	YA_promoterTSS
chrI	5999154	5999631	peak1803	-1.144	0.00185	0.418	0.709	EE_activeEnhancer	L3_activeEnhancer	YA_promoterTSS
chrI	6000284	6000483	peak1804	-1.531	9.45e-05	1.645	0.0935	EE_transcribedGeneBody	L3_activeEnhancer	YA_promoterTSS
chrI	6000911	6001481	peak1805	-1.647	6.48e-06	0.926	0.329	EE_transcribedGeneBody	L3_activeEnhancer	YA_promoterTSS
chrI	6010487	6010789	peak1806	-0.173	0.815	-0.543	0.671	EE_transcribedGeneBody	L3_lowSignal	YA_transcribedGeneBody
chrI	6024600	6024875	peak1807	0.176	0.824	-0.746	0.567	EE_transcribedGeneBody	L3_transcribedGeneBody	YA_transcribedGeneBody
chrI	6034537	6034813	peak1808	-1.154	0.0028	1.617	0.0798	EE_lowSignal	L3_repressedEnhancer	YA_lowSignal
chrI	6035554	6036093	peak1809	0.321	0.385	-0.267	0.818	EE_lowSignal	L3_lowSignal	YA_transcribedGeneBody
chrI	6036116	6037785	peak1810	0.047	0.906	-0.023	0.985	EE_lowSignal	L3_lowSignal	YA_transcribedGeneBody
chrI	6047835	6048312	peak1811	1.351	0.000909	-1.248	0.229	EE_repressedEnhancer	L3_lowSignal	YA_H3K27me3Repressed
chrI	6050795	6051077	peak1812	-0.333	0.397	-0.393	0.711	EE_repressedEnhancer	L3_repressedEnhancer	YA_repressedEnhancer
chrI	6051039	6051445	peak1813	-0.333	0.397	-0.393	0.711	EE_repressedEnhancer	L3_promoterTSS	YA_repressedEnhancer
chrI	6056482	6056589	peak1814	0.508	0.337	-0.284	0.913	EE_transcribedGeneBody	L3_transcribedGeneBody	YA_promoterTSS
chrI	6057271	6057493	peak1815	0.627	0.285	-0.746	0.568	EE_transcribedGeneBody	L3_transcribedGeneBody	YA_transcribedGeneBody
chrI	6058224	6058830	peak1816	-0.584	0.134	1.053	0.246	EE_promoterTSS	L3_transcribedGeneBody	YA_promoterTSS
chrI	6060950	6061408	peak1817	-1.736	1.99e-06	0.529	0.634	EE_promoterTSS	L3_promoterTSS	YA_promoterTSS
chrI	6063689	6063904	peak1818	-0.684	0.107	0.875	0.455	EE_promoterTSS	L3_promoterTSS	YA_activeEnhancer
chrI	6064085	6064577	peak1819	0.465	0.36	-0.597	0.648	EE_promoterTSS	L3_transcribedGeneBody	YA_transcribedGeneBody
chrI	6069403	6069514	peak1820	-0.626	0.288	0.502	0.881	EE_transcribedGeneBody	L3_transcribedGeneBody	YA_transcribedGeneBody
chrI	6072901	6073314	peak1821	0.688	0.0999	0.135	0.971	EE_promoterTSS	L3_transcribedGeneBody	YA_transcribedGeneBody
chrI	6073440	6073878	peak1822	-0.203	0.651	0.582	0.578	EE_activeEnhancer	L3_activeEnhancer	YA_promoterTSS
chrI	6077173	6077559	peak1823	-0.691	0.0733	0.088	0.969	EE_activeEnhancer	L3_transcribedGeneBody	YA_transcribedGeneBody
chrI	6079641	6079911	peak1824	-0.765	0.0413	0.966	0.311	EE_activeEnhancer	L3_activeEnhancer	YA_activeEnhancer
chrI	6080543	6080806	peak1825	-0.413	0.266	0.808	0.477	EE_activeEnhancer	L3_activeEnhancer	YA_transcribedGeneBody
chrI	6081236	6081731	peak1826	-1.3	0.0006	-0.231	0.865	EE_repressedEnhancer	L3_repressedEnhancer	NA
chrI	6082490	6083067	peak1827	-1.022	0.00568	-0.3	0.809	EE_lowSignal	L3_lowSignal	YA_lowSignal
chrI	6083072	6083370	peak1828	-0.488	0.267	0.009	0.99	EE_repressedEnhancer	L3_repressedEnhancer	YA_repressedEnhancer
chrI	6084305	6084668	peak1829	0.424	0.336	-0.737	0.541	EE_repressedEnhancer	L3_lowSignal	YA_repressedEnhancer
chrI	6085636	6085808	peak1830	0.136	0.802	-0.695	0.598	EE_H3K27me3Repressed	L3_lowSignal	YA_repressedEnhancer
chrI	6087337	6087831	peak1831	1.531	0.00143	-2.287	0.00201	NA	L3_H3K27me3Repressed	YA_transcribedGeneBody
chrI	6090049	6090904	peak1832	-0.46	0.266	-0.396	0.733	EE_transcribedGeneBody	L3_lowSignal	YA_transcribedGeneBody
chrI	6091452	6092351	peak1833	-2.298	1.72e-10	0.324	0.783	EE_promoterTSS	L3_promoterTSS	YA_promoterTSS
chrI	6092609	6092991	peak1834	-1.63	1.13e-05	0.274	0.832	EE_promoterTSS	L3_promoterTSS	YA_promoterTSS
chrI	6095350	6095631	peak1835	-0.448	0.408	-0.442	0.667	EE_lowSignal	L3_lowSignal	YA_H3K27me3Repressed
chrI	6095768	6096029	peak1836	-0.496	0.261	-0.004	0.981	EE_lowSignal	L3_lowSignal	YA_heterochromatin
chrI	6097458	6097773	peak1837	0.257	0.527	-0.682	0.515	EE_repressedEnhancer	L3_H3K27me3Repressed	YA_H3K27me3Repressed
chrI	6100904	6101577	peak1838	-0.151	0.832	-0.288	0.809	EE_lowSignal	L3_lowSignal	YA_heterochromatin
chrI	6101989	6102465	peak1839	0.974	0.0513	-1.592	0.0578	EE_lowSignal	L3_H3K27me3Repressed	YA_H3K27me3Repressed
chrI	6105619	6105932	peak1840	-0.905	0.0205	-0.48	0.676	EE_lowSignal	L3_lowSignal	YA_lowSignal
chrI	6106294	6106477	peak1841	0.658	0.472	-1.211	0.412	EE_transcribedGeneBody	L3_transcribedGeneBody	YA_transcribedGeneBody
chrI	6108233	6108829	peak1842	-0.692	0.111	-0.126	0.929	EE_transcribedGeneBody	L3_transcribedGeneBody	YA_promoterTSS
chrI	6114848	6115334	peak1843	0.199	0.82	-0.753	0.537	EE_activeEnhancer	L3_activeEnhancer	YA_repressedEnhancer
chrI	6117964	6118443	peak1844	-2.639	5.02e-13	0.434	0.694	EE_repressedEnhancer	NA	YA_activeEnhancer
chrI	6120495	6120807	peak1845	-0.978	0.00886	-0.206	0.888	EE_lowSignal	L3_activeEnhancer	YA_activeEnhancer
chrI	6121717	6122159	peak1846	0.432	0.435	-0.122	0.936	EE_repressedEnhancer	L3_transcribedGeneBody	YA_activeEnhancer
chrI	6122849	6123075	peak1847	-0.879	0.0157	0.704	0.562	EE_repressedEnhancer	L3_transcribedGeneBody	YA_activeEnhancer
chrI	6124772	6124977	peak1848	-0.262	0.495	0.485	0.777	EE_lowSignal	L3_transcribedGeneBody	YA_transcribedGeneBody
chrI	6125236	6126079	peak1849	0.187	0.716	-0.458	0.721	EE_lowSignal	L3_transcribedGeneBody	YA_transcribedGeneBody
chrI	6132722	6132994	peak1850	0.284	0.554	-0.206	0.994	EE_lowSignal	L3_lowSignal	YA_lowSignal
chrI	6135346	6136827	peak1851	-1.001	0.00626	-0.545	0.602	EE_lowSignal	L3_repressedEnhancer	YA_repressedEnhancer
chrI	6151468	6151864	peak1852	1.098	0.00271	0.915	0.371	EE_activeEnhancer	L3_repressedEnhancer	YA_repressedEnhancer
chrI	6153431	6154006	peak1853	0.098	0.832	1.065	0.225	EE_promoterTSS	L3_transcribedGeneBody	YA_repressedEnhancer
chrI	6154158	6154773	peak1854	0.969	0.00931	0.574	0.558	EE_promoterTSS	L3_transcribedGeneBody	YA_activeEnhancer
chrI	6154821	6155013	peak1855	1.382	0.000537	0.81	0.605	EE_promoterTSS	L3_transcribedGeneBody	YA_lowSignal
chrI	6156559	6156761	peak1856	0.407	0.315	0.032	1	EE_promoterTSS	L3_transcribedGeneBody	YA_activeEnhancer
chrI	6162414	6162670	peak1857	-0.277	0.533	0.089	0.98	EE_repressedEnhancer	L3_lowSignal	YA_activeEnhancer
chrI	6163729	6164089	peak1858	-1.214	0.00159	0.011	0.987	EE_lowSignal	L3_promoterTSS	YA_activeEnhancer
chrI	6166634	6166998	peak1859	-0.147	0.722	0.848	0.378	EE_activeEnhancer	L3_promoterTSS	YA_lowSignal
chrI	6167161	6167316	peak1860	-0.17	0.721	1.215	0.257	EE_activeEnhancer	L3_activeEnhancer	YA_activeEnhancer
chrI	6171020	6171876	peak1861	-0.818	0.0303	1.075	0.225	NA	L3_lowSignal	YA_lowSignal
chrI	6172773	6173482	peak1862	-0.672	0.0832	1.08	0.234	EE_activeEnhancer	L3_promoterTSS	YA_activeEnhancer
chrI	6174829	6175580	peak1863	-0.99	0.0072	0.741	0.449	EE_repressedEnhancer	L3_repressedEnhancer	YA_activeEnhancer
chrI	6176807	6177189	peak1864	0.979	0.0312	-0.202	0.959	EE_repressedEnhancer	L3_lowSignal	YA_lowSignal
chrI	6183843	6184057	peak1865	0.067	0.775	-0.052	0.951	EE_promoterTSS	L3_promoterTSS	YA_promoterTSS
chrI	6185790	6186109	peak1866	0.443	0.425	-0.635	0.593	EE_transcribedGeneBody	L3_transcribedGeneBody	YA_transcribedGeneBody
chrI	6186257	6186502	peak1867	-0.087	0.933	0.314	0.891	EE_transcribedGeneBody	L3_transcribedGeneBody	YA_transcribedGeneBody
chrI	6186938	6187202	peak1868	0.402	0.7	-0.328	0.889	EE_transcribedGeneBody	L3_transcribedGeneBody	YA_transcribedGeneBody
chrI	6187369	6187524	peak1869	0.147	0.901	0.452	0.813	EE_transcribedGeneBody	L3_transcribedGeneBody	YA_transcribedGeneBody
chrI	6196086	6196293	peak1870	0.012	0.892	-0.052	0.929	EE_lowSignal	L3_lowSignal	YA_lowSignal
chrI	6199770	6200261	peak1871	-0.334	0.531	0.301	0.825	EE_H3K27me3Repressed	L3_lowSignal	YA_H3K27me3Repressed
chrI	6201829	6202017	peak1872	1.708	0.00452	-0.018	0.623	EE_promoterTSS	L3_lowSignal	YA_lowSignal
chrI	6202122	6202458	peak1873	2.637	2.99e-07	-0.427	0.95	EE_promoterTSS	L3_lowSignal	YA_lowSignal
chrI	6202876	6203234	peak1874	3.099	3.27e-09	-0.868	0.531	EE_lowSignal	L3_lowSignal	YA_lowSignal
chrI	6207253	6207457	peak1875	-0.187	0.851	-0.6	0.658	EE_transcribedGeneBody	L3_transcribedGeneBody	YA_transcribedGeneBody
chrI	6209056	6209347	peak1876	-0.717	0.135	0.268	0.895	EE_transcribedGeneBody	L3_transcribedGeneBody	YA_transcribedGeneBody
chrI	6210794	6211136	peak1877	-1.655	4.96e-06	0.579	0.577	EE_promoterTSS	L3_activeEnhancer	YA_transcribedGeneBody
chrI	6212646	6213184	peak1878	-1.047	0.00495	-0.067	0.962	EE_transcribedGeneBody	L3_transcribedGeneBody	YA_transcribedGeneBody
chrI	6215473	6215683	peak1879	-0.723	0.0471	0.14	0.954	EE_promoterTSS	L3_promoterTSS	YA_promoterTSS
chrI	6219389	6221173	peak1880	-0.88	0.0175	-0.515	0.622	EE_promoterTSS	L3_promoterTSS	NA
chrI	6221402	6221909	peak1881	-0.469	0.31	-0.112	0.928	EE_transcribedGeneBody	L3_lowSignal	YA_lowSignal
chrI	6222578	6222787	peak1882	0.771	0.162	-0.535	0.609	EE_transcribedGeneBody	L3_lowSignal	YA_transcribedGeneBody
chrI	6230980	6231234	peak1883	0.481	0.276	-0.059	0.992	EE_lowSignal	L3_lowSignal	YA_H3K27me3Repressed
chrI	6235959	6236273	peak1884	-0.337	0.318	0.35	0.664	EE_H3K27me3Repressed	L3_lowSignal	YA_H3K27me3Repressed
chrI	6238199	6238778	peak1885	-1.246	0.000781	1.155	0.209	EE_repressedEnhancer	L3_lowSignal	YA_lowSignal
chrI	6250803	6251198	peak1886	0.6	0.122	-0.569	0.628	EE_repressedEnhancer	L3_lowSignal	YA_H3K27me3Repressed
chrI	6252887	6253069	peak1887	-0.656	0.103	-0.237	0.918	EE_activeEnhancer	L3_lowSignal	YA_lowSignal
chrI	6257112	6257292	peak1888	1.062	0.0688	-0.478	0.828	EE_transcribedGeneBody	L3_transcribedGeneBody	YA_transcribedGeneBody
chrI	6258850	6259565	peak1889	-0.754	0.0505	1.017	0.304	EE_repressedEnhancer	L3_lowSignal	YA_lowSignal
chrI	6260172	6260522	peak1890	0.156	0.845	-0.681	0.551	EE_repressedEnhancer	L3_repressedEnhancer	YA_repressedEnhancer
chrI	6263425	6263705	peak1891	-1.324	0.000937	1.184	0.192	EE_lowSignal	L3_lowSignal	YA_lowSignal
chrI	6264928	6265296	peak1892	-0.527	0.278	-1.56	0.0456	EE_repressedEnhancer	L3_lowSignal	YA_H3K27me3Repressed
chrI	6267858	6268079	peak1893	0.359	0.51	0.141	0.995	EE_lowSignal	L3_lowSignal	YA_H3K27me3Repressed
chrI	6271915	6272261	peak1894	0.787	0.115	-0.322	0.833	EE_lowSignal	L3_lowSignal	YA_H3K27me3Repressed
chrI	6272864	6273427	peak1895	0.707	0.0622	-1.161	0.242	EE_lowSignal	L3_lowSignal	YA_heterochromatin
chrI	6279029	6279578	peak1896	0.176	0.701	1.037	0.274	EE_activeEnhancer	L3_repressedEnhancer	YA_repressedEnhancer
chrI	6279800	6280004	peak1897	1.593	0.000279	1.575	0.187	EE_activeEnhancer	L3_lowSignal	YA_repressedEnhancer
chrI	6280278	6280752	peak1898	1.321	0.000414	0.684	0.533	EE_activeEnhancer	L3_repressedEnhancer	YA_repressedEnhancer
chrI	6282447	6282679	peak1899	-0.048	0.948	-0.974	0.264	EE_promoterTSS	L3_activeEnhancer	YA_activeEnhancer
chrI	6283435	6283880	peak1900	0.03	0.95	0.939	0.324	EE_promoterTSS	L3_activeEnhancer	YA_activeEnhancer
chrI	6283974	6284194	peak1901	0.688	0.106	0.66	0.65	EE_promoterTSS	L3_promoterTSS	YA_activeEnhancer
chrI	6284403	6284631	peak1902	1.228	0.00202	0.404	0.826	EE_promoterTSS	L3_promoterTSS	YA_activeEnhancer
chrI	6285203	6285541	peak1903	0.788	0.0493	-0.208	0.892	EE_promoterTSS	L3_promoterTSS	YA_activeEnhancer
chrI	6285706	6285988	peak1904	0.98	0.0124	0.785	0.476	EE_promoterTSS	L3_activeEnhancer	YA_activeEnhancer
chrI	6287702	6288052	peak1905	0.729	0.0601	0.862	0.492	EE_promoterTSS	L3_transcribedGeneBody	NA
chrI	6288328	6288713	peak1906	0.601	0.122	1.137	0.255	EE_promoterTSS	L3_transcribedGeneBody	YA_activeEnhancer
chrI	6290073	6290281	peak1907	-0.504	0.113	0.244	0.741	EE_activeEnhancer	L3_transcribedGeneBody	YA_transcribedGeneBody
chrI	6293937	6294141	peak1908	-0.685	0.0297	-0.018	0.989	EE_transcribedGeneBody	L3_transcribedGeneBody	YA_promoterTSS
chrI	6299946	6300116	peak1909	1.035	0.0239	0.83	0.673	EE_lowSignal	L3_lowSignal	YA_lowSignal
chrI	6305853	6306009	peak1910	2.662	2.2e-05	-0.216	0.888	EE_H3K27me3Repressed	L3_lowSignal	YA_H3K27me3Repressed
chrI	6312078	6312296	peak1911	1.7	0.00322	-2.038	0.0506	EE_H3K27me3Repressed	L3_promoterTSS	YA_H3K27me3Repressed
chrI	6315824	6316065	peak1912	0.165	0.791	-0.844	0.427	EE_transcribedGeneBody	L3_transcribedGeneBody	YA_transcribedGeneBody
chrI	6316494	6317071	peak1913	-0.059	0.903	-0.916	0.342	EE_transcribedGeneBody	L3_transcribedGeneBody	YA_transcribedGeneBody
chrI	6317260	6317491	peak1914	-1.449	0.000517	-0.731	0.483	EE_activeEnhancer	L3_lowSignal	YA_lowSignal
chrI	6317687	6318068	peak1915	-0.819	0.03	-0.26	0.849	EE_promoterTSS	L3_promoterTSS	YA_promoterTSS
chrI	6318773	6319407	peak1916	-0.322	0.507	-0.4	0.719	EE_transcribedGeneBody	L3_transcribedGeneBody	YA_transcribedGeneBody
chrI	6322475	6322635	peak1917	1.214	0.0118	-0.747	0.62	EE_lowSignal	L3_lowSignal	YA_H3K27me3Repressed
chrI	6324112	6324730	peak1918	2.129	2.23e-07	-1.507	0.142	EE_repressedEnhancer	L3_lowSignal	YA_H3K27me3Repressed
chrI	6324793	6325183	peak1919	1.251	0.000644	0.024	0.996	EE_repressedEnhancer	L3_lowSignal	YA_heterochromatin
chrI	6326311	6326672	peak1920	2.473	3.96e-07	-1.327	0.269	EE_repressedEnhancer	L3_lowSignal	YA_H3K27me3Repressed
chrI	6328212	6328289	peak1921	2.726	1.41e-05	-1.413	0.32	EE_repressedEnhancer	L3_lowSignal	YA_H3K27me3Repressed
chrI	6330611	6330788	peak1922	0.551	0.616	0.662	0.607	EE_repressedEnhancer	L3_lowSignal	YA_lowSignal
chrI	6333639	6333942	peak1923	-0.911	0.0167	0.133	0.868	EE_lowSignal	L3_lowSignal	YA_repressedEnhancer
chrI	6334083	6334262	peak1924	-0.536	0.308	0.5	0.697	EE_lowSignal	L3_lowSignal	YA_lowSignal
chrI	6334911	6335164	peak1925	-0.107	0.781	0.562	0.664	EE_repressedEnhancer	L3_repressedEnhancer	YA_activeEnhancer
chrI	6338303	6338603	peak1926	-0.537	0.18	0.6	0.623	EE_repressedEnhancer	NA	NA
chrI	6338673	6338871	peak1927	-0.998	0.00855	0.359	0.761	EE_lowSignal	L3_transcribedGeneBody	YA_activeEnhancer
chrI	6340023	6340455	peak1928	-1.327	0.000234	0.532	0.614	EE_repressedEnhancer	L3_activeEnhancer	YA_repressedEnhancer
chrI	6344265	6344462	peak1929	0.394	0.489	0.028	0.913	EE_transcribedGeneBody	L3_transcribedGeneBody	YA_transcribedGeneBody
chrI	6345444	6345763	peak1930	0.371	0.464	-0.576	0.595	EE_transcribedGeneBody	L3_transcribedGeneBody	YA_transcribedGeneBody
chrI	6350790	6353178	peak1931	-0.639	0.1	-0.326	0.776	EE_transcribedGeneBody	L3_heterochromatin	YA_transcribedGeneBody
chrI	6355970	6356134	peak1932	0.443	0.558	-1.512	0.188	EE_transcribedGeneBody	L3_transcribedGeneBody	YA_transcribedGeneBody
chrI	6356634	6356883	peak1933	-0.178	0.775	-0.223	0.874	EE_transcribedGeneBody	L3_transcribedGeneBody	YA_transcribedGeneBody
chrI	6364832	6364920	peak1934	-2.417	7.33e-10	1	0.316	EE_lowSignal	L3_promoterTSS	YA_lowSignal
chrI	6365682	6366506	peak1935	-0.479	0.224	-0.029	0.984	EE_promoterTSS	L3_promoterTSS	NA
chrI	6366775	6367265	peak1936	-0.317	0.43	-0.608	0.599	EE_transcribedGeneBody	L3_transcribedGeneBody	YA_transcribedGeneBody
chrI	6369737	6369978	peak1937	-1.075	0.0179	-0.987	0.265	EE_transcribedGeneBody	L3_promoterTSS	YA_transcribedGeneBody
chrI	6371326	6371579	peak1938	-0.165	0.766	0.005	0.999	EE_transcribedGeneBody	L3_lowSignal	YA_transcribedGeneBody
chrI	6372781	6372892	peak1939	-1.616	3.04e-05	0.928	0.339	EE_transcribedGeneBody	L3_lowSignal	YA_transcribedGeneBody
chrI	6373881	6374043	peak1940	-1.371	0.000424	0.478	0.674	EE_transcribedGeneBody	L3_activeEnhancer	YA_activeEnhancer
chrI	6374848	6375125	peak1941	0.438	0.337	-0.551	0.756	EE_activeEnhancer	L3_activeEnhancer	YA_activeEnhancer
chrI	6375308	6375560	peak1942	-0.523	0.224	0.983	0.389	EE_activeEnhancer	L3_activeEnhancer	YA_activeEnhancer
chrI	6378732	6379360	peak1943	-1.394	0.000123	1.061	0.234	EE_activeEnhancer	L3_transcribedGeneBody	YA_activeEnhancer
chrI	6380399	6380668	peak1944	-0.371	0.399	1.223	0.235	EE_activeEnhancer	L3_activeEnhancer	YA_activeEnhancer
chrI	6381067	6381246	peak1945	-0.791	0.0256	1.114	0.348	EE_transcribedGeneBody	L3_transcribedGeneBody	YA_activeEnhancer
chrI	6381395	6381602	peak1946	-0.562	0.263	0.294	0.858	EE_transcribedGeneBody	L3_transcribedGeneBody	YA_activeEnhancer
chrI	6385771	6385921	peak1947	0.196	0.625	0.292	0.806	EE_lowSignal	L3_transcribedGeneBody	YA_transcribedGeneBody
chrI	6389631	6390033	peak1948	-0.538	0.161	-0.125	0.926	EE_lowSignal	L3_lowSignal	YA_lowSignal
chrI	6394155	6394605	peak1949	-0.895	0.0211	0.504	0.658	EE_repressedEnhancer	L3_lowSignal	YA_lowSignal
chrI	6398057	6398449	peak1950	-1.67	9.76e-06	1.454	0.111	EE_repressedEnhancer	L3_activeEnhancer	YA_repressedEnhancer
chrI	6401265	6401940	peak1951	0.354	0.426	0.056	0.962	EE_lowSignal	L3_lowSignal	YA_lowSignal
chrI	6403868	6404122	peak1952	0.037	0.842	2.047	0.0264	EE_repressedEnhancer	L3_lowSignal	YA_repressedEnhancer
chrI	6406145	6406589	peak1953	0.133	0.72	-0.052	0.977	EE_lowSignal	L3_lowSignal	YA_lowSignal
chrI	6410038	6410281	peak1954	0.472	0.276	-0.899	0.44	EE_lowSignal	L3_transcribedGeneBody	YA_transcribedGeneBody
chrI	6412256	6413111	peak1955	-0.229	0.583	0.482	0.695	EE_activeEnhancer	L3_lowSignal	YA_lowSignal
chrI	6416780	6417198	peak1956	-1.825	9.16e-07	0.297	0.809	EE_lowSignal	L3_lowSignal	YA_lowSignal
chrI	6420351	6420560	peak1957	0.037	0.893	1.036	0.493	EE_lowSignal	L3_lowSignal	YA_lowSignal
chrI	6420833	6421037	peak1958	0.933	0.0641	0.049	0.94	EE_transcribedGeneBody	L3_transcribedGeneBody	YA_transcribedGeneBody
chrI	6421847	6422084	peak1959	-0.552	0.128	-0.28	0.824	EE_promoterTSS	L3_promoterTSS	YA_promoterTSS
chrI	6435585	6436241	peak1960	-2.338	1.73e-10	0.551	0.599	EE_lowSignal	L3_activeEnhancer	YA_heterochromatin
chrI	6438893	6439049	peak1961	-0.707	0.151	0.286	0.906	EE_lowSignal	L3_transcribedGeneBody	YA_H3K27me3Repressed
chrI	6442169	6442351	peak1962	0.042	0.897	-0.389	0.738	EE_transcribedGeneBody	L3_transcribedGeneBody	YA_transcribedGeneBody
chrI	6443235	6443473	peak1963	0.767	0.175	-1.033	0.389	EE_transcribedGeneBody	L3_transcribedGeneBody	YA_transcribedGeneBody
chrI	6444211	6444396	peak1964	0.289	0.602	-0.248	0.805	EE_transcribedGeneBody	L3_transcribedGeneBody	YA_transcribedGeneBody
chrI	6445979	6446380	peak1965	-0.023	0.95	-0.585	0.62	EE_promoterTSS	L3_transcribedGeneBody	YA_promoterTSS
chrI	6446569	6446753	peak1966	-0.489	0.148	-0.067	0.975	EE_promoterTSS	L3_activeEnhancer	YA_promoterTSS
chrI	6446981	6447170	peak1967	-0.655	0.05	-0.786	0.508	EE_promoterTSS	L3_activeEnhancer	YA_promoterTSS
chrI	6449308	6449522	peak1968	0.306	0.451	-0.535	0.644	EE_transcribedGeneBody	L3_transcribedGeneBody	YA_transcribedGeneBody
chrI	6453002	6453336	peak1969	0.295	0.546	-0.723	0.559	EE_transcribedGeneBody	L3_transcribedGeneBody	YA_transcribedGeneBody
chrI	6456383	6456533	peak1970	0.509	0.571	0.276	0.893	EE_lowSignal	L3_lowSignal	YA_repressedEnhancer
chrI	6456680	6457096	peak1971	0.222	0.699	-0.359	0.843	EE_repressedEnhancer	L3_transcribedGeneBody	YA_transcribedGeneBody
chrI	6459345	6459912	peak1972	-1.754	1.01e-06	0.384	0.738	EE_activeEnhancer	L3_promoterTSS	YA_promoterTSS
chrI	6460276	6460477	peak1973	-0.832	0.0199	0.445	0.755	EE_promoterTSS	L3_promoterTSS	YA_promoterTSS
chrI	6460815	6460977	peak1974	-0.468	0.267	0.247	0.934	EE_promoterTSS	L3_promoterTSS	YA_promoterTSS
chrI	6461941	6462278	peak1975	0.141	0.706	0.353	0.864	EE_transcribedGeneBody	L3_transcribedGeneBody	YA_transcribedGeneBody
chrI	6465922	6466145	peak1976	-1.484	7.37e-05	0.286	0.81	EE_transcribedGeneBody	L3_promoterTSS	YA_promoterTSS
chrI	6468201	6468663	peak1977	0.104	0.781	-0.672	0.52	EE_transcribedGeneBody	L3_lowSignal	YA_transcribedGeneBody
chrI	6468703	6469359	peak1978	0.161	0.714	-0.841	0.382	EE_transcribedGeneBody	L3_lowSignal	YA_transcribedGeneBody
chrI	6470929	6471390	peak1979	1.154	0.0183	-1.415	0.15	EE_transcribedGeneBody	L3_transcribedGeneBody	YA_transcribedGeneBody
chrI	6471903	6472089	peak1980	0.093	0.967	0.058	0.982	EE_activeEnhancer	L3_activeEnhancer	YA_transcribedGeneBody
chrI	6472492	6472686	peak1981	0.638	0.54	-2.052	0.022	EE_transcribedGeneBody	L3_activeEnhancer	YA_lowSignal
chrI	6476672	6477000	peak1982	1.042	0.0279	-1.23	0.238	EE_transcribedGeneBody	L3_lowSignal	YA_transcribedGeneBody
chrI	6477792	6478054	peak1983	0.713	0.0771	-0.985	0.379	EE_lowSignal	L3_lowSignal	YA_heterochromatin
chrI	6488938	6489479	peak1984	-0.01	0.964	0.786	0.466	EE_repressedEnhancer	L3_lowSignal	YA_transcribedGeneBody
chrI	6493852	6494064	peak1985	-0.794	0.0526	0.117	0.977	EE_promoterTSS	L3_promoterTSS	YA_promoterTSS
chrI	6497263	6497801	peak1986	-1.834	3.92e-07	-0.11	0.939	EE_lowSignal	L3_activeEnhancer	YA_lowSignal
chrI	6498035	6498619	peak1987	-1.707	1.94e-06	-0.349	0.768	EE_lowSignal	L3_promoterTSS	YA_lowSignal
chrI	6498619	6499175	peak1988	-1.707	1.94e-06	-0.349	0.768	EE_lowSignal	L3_promoterTSS	YA_H3K27me3Repressed
chrI	6499512	6500002	peak1989	-1.778	1.21e-06	-0.126	0.932	EE_lowSignal	L3_promoterTSS	YA_lowSignal
chrI	6500956	6501149	peak1990	-1.096	0.0157	-0.488	0.69	EE_lowSignal	L3_promoterTSS	YA_H3K27me3Repressed
chrI	6501407	6501557	peak1991	-0.825	0.0676	0.654	0.645	EE_lowSignal	L3_lowSignal	YA_lowSignal
chrI	6513743	6514434	peak1992	-0.444	0.421	-1.209	0.156	EE_transcribedGeneBody	L3_activeEnhancer	YA_transcribedGeneBody
chrI	6514973	6515247	peak1993	0.127	0.674	-1.332	0.213	EE_transcribedGeneBody	L3_lowSignal	YA_transcribedGeneBody
chrI	6515437	6515804	peak1994	0.17	0.643	-1.192	0.237	EE_transcribedGeneBody	L3_lowSignal	YA_transcribedGeneBody
chrI	6518218	6518396	peak1995	0.362	0.294	0.334	0.957	EE_repressedEnhancer	L3_lowSignal	YA_heterochromatin
chrI	6527518	6527883	peak1996	-0.166	0.839	0.467	0.786	EE_lowSignal	L3_lowSignal	YA_heterochromatin
chrI	6528057	6528595	peak1997	0.803	0.0949	-1.115	0.312	EE_lowSignal	L3_lowSignal	YA_heterochromatin
chrI	6533886	6534231	peak1998	0.989	0.0656	-0.789	0.584	EE_repressedEnhancer	L3_lowSignal	YA_lowSignal
[truncated: 28,833 more rows]
