# Supplementary material for: Chromatin accessibility dynamics reveal novel functional enhancers in C. elegans
Source: Genome Res. 2017 Dec;27(12):2096–107. doi: 10.1101/gr.226233.117 (PMC5741055; doi:10.1101/gr.226233.117)
Supplement: Supplemental Material [file supp_gr.226233.117_Supplemental_Table_S4.xlsx]

## Sheet: S4 - EE more access. vs L3 - BP
GO Term	Description	P-value	FDR q-value	Enrichment	N	B	n	b	Genes
GO:0007275	multicellular organismal development	4.7e-09	2.01e-05	1.88	7788	316	1195	91	[ned-8 - protein ned-8, ceh-36 - protein ceh-36, lin-32 - protein lin-32, ceh-37 - protein ceh-37, ceh-13 - protein ceh-13, cnd-1 - protein cnd-1, hda-1 - protein hda-1, axl-1 - protein axl-1, efn-4 - protein efn-4, hch-1 - protein hch-1, unc-53 - protein unc-53, sgk-1 - protein sgk-1, sfrp-1 - protein sfrp-1, wago-1 - protein wago-1, mom-2 - protein mom-2, unc-4 - protein unc-4, vab-3 - protein …
GO:0097485	neuron projection guidance	1.99e-08	4.26e-05	5.23	7788	82	363	20	[unc-6 - protein unc-6, cfz-2 - protein cfz-2, vab-8 - protein vab-8, egl-46 - protein egl-46, rac-2 - protein rac-2, vab-2 - protein vab-2, ceh-13 - protein ceh-13, mig-10 - protein mig-10, unc-5 - protein unc-5, tag-333 - protein tag-333, trim-9 - protein trim-9, efn-4 - protein efn-4, lad-2 - protein lad-2, unc-53 - protein unc-53, cam-1 - protein cam-1, fmi-1 - protein fmi-1, vab-3 - protein …
GO:0007411	axon guidance	1.99e-08	2.84e-05	5.23	7788	82	363	20	[unc-6 - protein unc-6, cfz-2 - protein cfz-2, vab-8 - protein vab-8, egl-46 - protein egl-46, rac-2 - protein rac-2, vab-2 - protein vab-2, ceh-13 - protein ceh-13, mig-10 - protein mig-10, tag-333 - protein tag-333, unc-5 - protein unc-5, trim-9 - protein trim-9, efn-4 - protein efn-4, lad-2 - protein lad-2, unc-53 - protein unc-53, cam-1 - protein cam-1, fmi-1 - protein fmi-1, vab-3 - protein …
GO:0001764	neuron migration	2.22e-08	2.37e-05	5.82	7788	24	837	15	[ham-1 - protein ham-1, hlh-14 - protein hlh-14, sax-3 - protein sax-3, vab-8 - protein vab-8, rac-2 - protein rac-2, egl-46 - protein egl-46, mig-10 - protein mig-10, tag-333 - protein tag-333, abi-1 - protein abi-1, hch-1 - protein hch-1, ceh-10 - protein ceh-10, kal-1 - protein kal-1, slt-1 - protein slt-1, gpn-1 - protein gpn-1, epi-1 - protein epi-1]
GO:0001708	cell fate specification	5.43e-08	4.64e-05	2.98	7788	84	1028	33	[unc-42 - protein unc-42, ceh-36 - protein ceh-36, ceh-37 - protein ceh-37, lin-12 - protein lin-12, let-381 - protein let-381, end-1 - protein end-1, lim-4 - protein lim-4, lag-2 - protein lag-2, fkh-2 - protein fkh-2, mex-3 - protein mex-3, ref-2 - protein ref-2, mom-2 - protein mom-2, dsh-2 - protein dsh-2, tap-1 - protein tap-1, ceh-10 - protein ceh-10, fax-1 - protein fax-1, hlh-14 - protein…
GO:0006928	movement of cell or subcellular component	3.3e-07	0.000235	3.41	7788	349	170	26	[piki-1 - protein piki-1, cfz-2 - protein cfz-2, cyd-1 - protein cyd-1, ceh-13 - protein ceh-13, klp-20 - protein klp-20, unc-5 - protein unc-5, trim-9 - protein trim-9, lad-2 - protein lad-2, unc-53 - protein unc-53, fmi-1 - protein fmi-1, vab-3 - protein vab-3, nhr-67 - protein nhr-67, vab-1 - protein vab-1, ceh-10 - protein ceh-10, B0198.3 - protein b0198.3, cdh-4 - protein cdh-4, pha-1 - prot…
GO:0048665	neuron fate specification	9.24e-07	0.000564	31	7788	8	157	5	[ceh-36 - protein ceh-36, ceh-37 - protein ceh-37, ref-2 - protein ref-2, fax-1 - protein fax-1, fkh-2 - protein fkh-2]
GO:0006357	regulation of transcription from RNA polymerase II promoter	1.86e-06	0.000995	4.03	7788	234	157	19	[ham-1 - protein ham-1, ceh-36 - protein ceh-36, hlh-14 - protein hlh-14, ceh-37 - protein ceh-37, mls-2 - protein mls-2, let-381 - protein let-381, ttx-1 - protein ttx-1, elt-1 - protein elt-1, hlh-2 - protein hlh-2, taf-1 - protein taf-1, fkh-2 - protein fkh-2, tbx-8 - protein tbx-8, his-38 - protein his-38, tbx-7 - protein tbx-7, ceh-27 - protein ceh-27, vab-3 - protein vab-3, ces-1 - protein …
GO:0016477	cell migration	2.76e-06	0.00131	2.67	7788	252	371	32	[piki-1 - protein piki-1, unc-6 - protein unc-6, cyd-1 - protein cyd-1, rac-2 - protein rac-2, tag-333 - protein tag-333, unc-5 - protein unc-5, efn-4 - protein efn-4, sem-5 - protein sem-5, unc-53 - protein unc-53, cam-1 - protein cam-1, vab-3 - protein vab-3, nhr-67 - protein nhr-67, vab-1 - protein vab-1, ceh-10 - protein ceh-10, B0198.3 - protein b0198.3, cdh-4 - protein cdh-4, pha-1 - protei…
GO:0006355	regulation of transcription, DNA-templated	2.79e-06	0.00119	3.29	7788	640	85	23	[ham-1 - protein ham-1, tbx-43 - protein tbx-43, ceh-36 - protein ceh-36, fkh-3 - protein fkh-3, mls-2 - protein mls-2, zip-8 - protein zip-8, tbx-41 - protein tbx-41, elt-1 - protein elt-1, ztf-11 - protein ztf-11, hlh-2 - protein hlh-2, cnd-1 - protein cnd-1, taf-1 - protein taf-1, fkh-2 - protein fkh-2, tbx-11 - protein tbx-11, tbx-8 - protein tbx-8, nhr-277 - protein nhr-277, tbx-31 - protein…
GO:0007186	G-protein coupled receptor signaling pathway	3.11e-06	0.00121	1.54	7788	192	2508	95	[odr-10 - protein odr-10, nlp-40 - protein nlp-40, npr-21 - protein npr-21, npr-6 - protein npr-6, lat-1 - protein lat-1, flp-21 - protein flp-21, T10E10.3 - protein t10e10.3, frpr-17 - protein frpr-17, frpr-12 - protein frpr-12, mgl-1 - protein mgl-1, CELE_C39E9.10 - protein c39e9.10, flp-19 - protein flp-19, srx-8 - protein srx-8, srsx-25 - protein srsx-25, F57C9.6 - protein f57c9.6, kqt-1 - pr…
GO:2001141	regulation of RNA biosynthetic process	3.21e-06	0.00114	3.26	7788	646	85	23	[ham-1 - protein ham-1, tbx-43 - protein tbx-43, ceh-36 - protein ceh-36, fkh-3 - protein fkh-3, zip-8 - protein zip-8, mls-2 - protein mls-2, tbx-41 - protein tbx-41, elt-1 - protein elt-1, ztf-11 - protein ztf-11, hlh-2 - protein hlh-2, cnd-1 - protein cnd-1, taf-1 - protein taf-1, fkh-2 - protein fkh-2, tbx-11 - protein tbx-11, tbx-8 - protein tbx-8, nhr-277 - protein nhr-277, tbx-31 - protein…
GO:1903506	regulation of nucleic acid-templated transcription	3.21e-06	0.00106	3.26	7788	646	85	23	[ham-1 - protein ham-1, tbx-43 - protein tbx-43, ceh-36 - protein ceh-36, fkh-3 - protein fkh-3, mls-2 - protein mls-2, zip-8 - protein zip-8, tbx-41 - protein tbx-41, elt-1 - protein elt-1, ztf-11 - protein ztf-11, hlh-2 - protein hlh-2, cnd-1 - protein cnd-1, taf-1 - protein taf-1, fkh-2 - protein fkh-2, tbx-11 - protein tbx-11, tbx-8 - protein tbx-8, nhr-277 - protein nhr-277, tbx-31 - protein…
GO:0048870	cell motility	4.18e-06	0.00128	2.61	7788	257	371	32	[piki-1 - protein piki-1, unc-6 - protein unc-6, cyd-1 - protein cyd-1, rac-2 - protein rac-2, unc-5 - protein unc-5, tag-333 - protein tag-333, efn-4 - protein efn-4, sem-5 - protein sem-5, unc-53 - protein unc-53, cam-1 - protein cam-1, vab-3 - protein vab-3, nhr-67 - protein nhr-67, vab-1 - protein vab-1, ceh-10 - protein ceh-10, B0198.3 - protein b0198.3, cdh-4 - protein cdh-4, pha-1 - protei…
GO:0051252	regulation of RNA metabolic process	4.37e-06	0.00125	3.21	7788	657	85	23	[ham-1 - protein ham-1, tbx-43 - protein tbx-43, ceh-36 - protein ceh-36, fkh-3 - protein fkh-3, mls-2 - protein mls-2, zip-8 - protein zip-8, tbx-41 - protein tbx-41, elt-1 - protein elt-1, ztf-11 - protein ztf-11, hlh-2 - protein hlh-2, cnd-1 - protein cnd-1, taf-1 - protein taf-1, fkh-2 - protein fkh-2, tbx-11 - protein tbx-11, tbx-8 - protein tbx-8, nhr-277 - protein nhr-277, tbx-31 - protein…
GO:0010468	regulation of gene expression	9.44e-06	0.00252	2.81	7788	829	87	26	[fkh-3 - protein fkh-3, ceh-36 - protein ceh-36, mls-2 - protein mls-2, tbx-41 - protein tbx-41, zip-8 - protein zip-8, ztf-11 - protein ztf-11, cnd-1 - protein cnd-1, fkh-2 - protein fkh-2, tbx-11 - protein tbx-11, nhr-277 - protein nhr-277, tbx-7 - protein tbx-7, nhr-119 - protein nhr-119, vab-3 - protein vab-3, ceh-27 - protein ceh-27, xol-1 - protein xol-1, tbx-43 - protein tbx-43, ham-1 - pr…
GO:0019219	regulation of nucleobase-containing compound metabolic process	1.03e-05	0.00259	3.06	7788	688	85	23	[ham-1 - protein ham-1, tbx-43 - protein tbx-43, ceh-36 - protein ceh-36, fkh-3 - protein fkh-3, mls-2 - protein mls-2, zip-8 - protein zip-8, tbx-41 - protein tbx-41, elt-1 - protein elt-1, ztf-11 - protein ztf-11, hlh-2 - protein hlh-2, cnd-1 - protein cnd-1, taf-1 - protein taf-1, fkh-2 - protein fkh-2, tbx-11 - protein tbx-11, tbx-8 - protein tbx-8, nhr-277 - protein nhr-277, tbx-31 - protein…
GO:2000112	regulation of cellular macromolecule biosynthetic process	1.14e-05	0.00272	3.04	7788	693	85	23	[ham-1 - protein ham-1, tbx-43 - protein tbx-43, ceh-36 - protein ceh-36, fkh-3 - protein fkh-3, zip-8 - protein zip-8, mls-2 - protein mls-2, tbx-41 - protein tbx-41, elt-1 - protein elt-1, ztf-11 - protein ztf-11, hlh-2 - protein hlh-2, cnd-1 - protein cnd-1, taf-1 - protein taf-1, fkh-2 - protein fkh-2, tbx-11 - protein tbx-11, tbx-8 - protein tbx-8, nhr-277 - protein nhr-277, tbx-31 - protein…
GO:0010556	regulation of macromolecule biosynthetic process	1.31e-05	0.00295	3.01	7788	699	85	23	[ham-1 - protein ham-1, tbx-43 - protein tbx-43, ceh-36 - protein ceh-36, fkh-3 - protein fkh-3, mls-2 - protein mls-2, zip-8 - protein zip-8, tbx-41 - protein tbx-41, elt-1 - protein elt-1, ztf-11 - protein ztf-11, hlh-2 - protein hlh-2, cnd-1 - protein cnd-1, taf-1 - protein taf-1, fkh-2 - protein fkh-2, tbx-11 - protein tbx-11, tbx-8 - protein tbx-8, nhr-277 - protein nhr-277, tbx-31 - protein…
GO:0045666	positive regulation of neuron differentiation	1.5e-05	0.00321	79.2	7788	5	59	3	[unc-53 - protein unc-53, hlh-2 - protein hlh-2, unc-5 - protein unc-5]
GO:0050769	positive regulation of neurogenesis	1.5e-05	0.00306	79.2	7788	5	59	3	[unc-53 - protein unc-53, hlh-2 - protein hlh-2, unc-5 - protein unc-5]
GO:0048729	tissue morphogenesis	1.88e-05	0.00364	6.05	7788	39	363	11	[eya-1 - protein eya-1, vab-2 - protein vab-2, cdh-3 - protein cdh-3, dgn-1 - protein dgn-1, arx-4 - protein arx-4, vab-1 - protein vab-1, kal-1 - protein kal-1, apx-1 - protein apx-1, gpn-1 - protein gpn-1, vab-23 - protein vab-23, efn-4 - protein efn-4]
GO:0009889	regulation of biosynthetic process	1.88e-05	0.0035	2.95	7788	715	85	23	[ham-1 - protein ham-1, tbx-43 - protein tbx-43, ceh-36 - protein ceh-36, fkh-3 - protein fkh-3, zip-8 - protein zip-8, mls-2 - protein mls-2, tbx-41 - protein tbx-41, elt-1 - protein elt-1, ztf-11 - protein ztf-11, hlh-2 - protein hlh-2, cnd-1 - protein cnd-1, taf-1 - protein taf-1, fkh-2 - protein fkh-2, tbx-11 - protein tbx-11, tbx-8 - protein tbx-8, nhr-277 - protein nhr-277, tbx-31 - protein…
GO:0031326	regulation of cellular biosynthetic process	1.88e-05	0.00336	2.95	7788	715	85	23	[ham-1 - protein ham-1, tbx-43 - protein tbx-43, ceh-36 - protein ceh-36, fkh-3 - protein fkh-3, mls-2 - protein mls-2, zip-8 - protein zip-8, tbx-41 - protein tbx-41, elt-1 - protein elt-1, ztf-11 - protein ztf-11, hlh-2 - protein hlh-2, cnd-1 - protein cnd-1, taf-1 - protein taf-1, fkh-2 - protein fkh-2, tbx-11 - protein tbx-11, tbx-8 - protein tbx-8, nhr-277 - protein nhr-277, tbx-31 - protein…
GO:0032774	RNA biosynthetic process	2.09e-05	0.00358	3.56	7788	463	85	18	[tbx-43 - protein tbx-43, fkh-3 - protein fkh-3, tbx-41 - protein tbx-41, elt-1 - protein elt-1, hlh-2 - protein hlh-2, cnd-1 - protein cnd-1, taf-1 - protein taf-1, fkh-2 - protein fkh-2, tbx-11 - protein tbx-11, ref-2 - protein ref-2, tbx-8 - protein tbx-8, nhr-277 - protein nhr-277, tbx-31 - protein tbx-31, tbx-7 - protein tbx-7, nhr-119 - protein nhr-119, ceh-27 - protein ceh-27, vab-3 - prot…
GO:0030030	cell projection organization	2.36e-05	0.00389	3.97	7788	95	351	17	[unc-6 - protein unc-6, lon-2 - protein lon-2, rac-2 - protein rac-2, D1044.2 - protein d1044.2, ceh-13 - protein ceh-13, klp-20 - protein klp-20, mig-10 - protein mig-10, unc-5 - protein unc-5, fkh-2 - protein fkh-2, trim-9 - protein trim-9, jbts-14 - protein jbts-14, unc-119 - protein unc-119, che-2 - protein che-2, unc-53 - protein unc-53, nhr-67 - protein nhr-67, vab-1 - protein vab-1, sax-2 …
GO:0060255	regulation of macromolecule metabolic process	2.46e-05	0.0039	2.53	7788	990	87	28	[fkh-3 - protein fkh-3, ceh-36 - protein ceh-36, zip-8 - protein zip-8, mls-2 - protein mls-2, tbx-41 - protein tbx-41, ztf-11 - protein ztf-11, cnd-1 - protein cnd-1, fkh-2 - protein fkh-2, tbx-11 - protein tbx-11, nhr-277 - protein nhr-277, tbx-7 - protein tbx-7, nhr-119 - protein nhr-119, vab-3 - protein vab-3, ceh-27 - protein ceh-27, xol-1 - protein xol-1, alx-1 - protein alx-1, tbx-43 - pro…
GO:0048598	embryonic morphogenesis	2.72e-05	0.00415	3.35	7788	84	553	20	[die-1 - protein die-1, nob-1 - protein nob-1, vab-19 - protein vab-19, hda-1 - protein hda-1, apx-1 - protein apx-1, efn-4 - protein efn-4, eya-1 - protein eya-1, tbx-8 - protein tbx-8, cdh-3 - protein cdh-3, vab-15 - protein vab-15, arx-4 - protein arx-4, dsh-2 - protein dsh-2, vab-1 - protein vab-1, kal-1 - protein kal-1, aph-1 - protein aph-1, vab-23 - protein vab-23, inx-3 - protein inx-3, m…
GO:0051171	regulation of nitrogen compound metabolic process	3.05e-05	0.0045	2.87	7788	733	85	23	[ham-1 - protein ham-1, tbx-43 - protein tbx-43, ceh-36 - protein ceh-36, fkh-3 - protein fkh-3, zip-8 - protein zip-8, mls-2 - protein mls-2, tbx-41 - protein tbx-41, elt-1 - protein elt-1, ztf-11 - protein ztf-11, hlh-2 - protein hlh-2, cnd-1 - protein cnd-1, taf-1 - protein taf-1, fkh-2 - protein fkh-2, tbx-11 - protein tbx-11, tbx-8 - protein tbx-8, nhr-277 - protein nhr-277, tbx-31 - protein…
GO:0007606	sensory perception of chemical stimulus	3.07e-05	0.00437	1.5	7788	90	3867	67	[srg-69 - protein srg-69, odr-10 - protein odr-10, sre-54 - protein sre-54, ceh-36 - protein ceh-36, gur-3 - protein gur-3, srg-2 - protein srg-2, sre-51 - protein sre-51, tyra-3 - protein tyra-3, odr-7 - protein odr-7, sra-25 - protein sra-25, srg-53 - protein srg-53, srg-66 - protein srg-66, glr-1 - protein glr-1, arl-13 - protein arl-13, sre-21 - protein sre-21, sre-5 - protein sre-5, srg-10 -…
GO:0051962	positive regulation of nervous system development	3.76e-05	0.00518	66	7788	6	59	3	[unc-53 - protein unc-53, hlh-2 - protein hlh-2, unc-5 - protein unc-5]
GO:0031175	neuron projection development	5.91e-05	0.00789	6.1	7788	40	319	10	[unc-6 - protein unc-6, lon-2 - protein lon-2, D1044.2 - protein d1044.2, ceh-13 - protein ceh-13, nhr-67 - protein nhr-67, sax-2 - protein sax-2, mig-10 - protein mig-10, unc-5 - protein unc-5, fkh-2 - protein fkh-2, trim-9 - protein trim-9]
GO:0050794	regulation of cellular process	5.94e-05	0.00769	1.31	7788	1982	625	208	[tbx-41 - protein tbx-41, nrde-3 - protein nrde-3, frpr-17 - protein frpr-17, T10E10.3 - protein t10e10.3, ces-2 - protein ces-2, ife-2 - protein ife-2, his-24 - protein his-24, F48E8.2 - protein f48e8.2, efn-4 - protein efn-4, spsb-2 - protein spsb-2, CELE_T26E3.6 - protein t26e3.6, che-2 - protein che-2, unc-4 - protein unc-4, dsh-2 - protein dsh-2, nhr-67 - protein nhr-67, tap-1 - protein tap-…
GO:0006366	transcription from RNA polymerase II promoter	6.65e-05	0.00836	3.16	7788	84	587	20	[fkh-4 - protein fkh-4, mdt-31 - protein mdt-31, egl-46 - protein egl-46, let-381 - protein let-381, ttx-1 - protein ttx-1, elt-1 - protein elt-1, ast-1 - protein ast-1, hlh-2 - protein hlh-2, lin-1 - protein lin-1, fkh-2 - protein fkh-2, F28C6.1 - protein f28c6.1, tbx-8 - protein tbx-8, tbx-7 - protein tbx-7, ceh-27 - protein ceh-27, F28C6.2 - protein f28c6.2, pag-3 - protein pag-3, unc-30 - pro…
GO:0080090	regulation of primary metabolic process	7.04e-05	0.00859	2.58	7788	888	85	25	[fkh-3 - protein fkh-3, ceh-36 - protein ceh-36, mls-2 - protein mls-2, tbx-41 - protein tbx-41, zip-8 - protein zip-8, ztf-11 - protein ztf-11, cnd-1 - protein cnd-1, fkh-2 - protein fkh-2, tbx-11 - protein tbx-11, nhr-277 - protein nhr-277, tbx-7 - protein tbx-7, nhr-119 - protein nhr-119, vab-3 - protein vab-3, ceh-27 - protein ceh-27, alx-1 - protein alx-1, tbx-43 - protein tbx-43, ham-1 - pr…
GO:0010720	positive regulation of cell development	7.31e-05	0.00869	56.57	7788	7	59	3	[unc-53 - protein unc-53, hlh-2 - protein hlh-2, unc-5 - protein unc-5]
GO:0007600	sensory perception	7.66e-05	0.00885	1.41	7788	110	4064	81	[mec-5 - protein mec-5, odr-10 - protein odr-10, srg-69 - protein srg-69, ceh-36 - protein ceh-36, sre-54 - protein sre-54, gur-3 - protein gur-3, mec-12 - protein mec-12, srg-2 - protein srg-2, tyra-3 - protein tyra-3, sre-51 - protein sre-51, mec-8 - protein mec-8, odr-7 - protein odr-7, sra-25 - protein sra-25, srg-53 - protein srg-53, srg-66 - protein srg-66, glr-1 - protein glr-1, arl-13 - p…
GO:0045944	positive regulation of transcription from RNA polymerase II promoter	8.9e-05	0.01	5.13	7788	116	157	12	[ham-1 - protein ham-1, ceh-36 - protein ceh-36, mls-2 - protein mls-2, his-38 - protein his-38, ttx-1 - protein ttx-1, vab-3 - protein vab-3, elt-1 - protein elt-1, hlh-2 - protein hlh-2, nhr-67 - protein nhr-67, fax-1 - protein fax-1, taf-1 - protein taf-1, fkh-2 - protein fkh-2]
GO:0002009	morphogenesis of an epithelium	0.000108	0.0118	5.65	7788	38	363	10	[vab-2 - protein vab-2, cdh-3 - protein cdh-3, arx-4 - protein arx-4, dgn-1 - protein dgn-1, vab-1 - protein vab-1, kal-1 - protein kal-1, apx-1 - protein apx-1, gpn-1 - protein gpn-1, vab-23 - protein vab-23, efn-4 - protein efn-4]
GO:0019222	regulation of metabolic process	0.000128	0.0137	2.21	7788	1126	97	31	[fkh-3 - protein fkh-3, ceh-36 - protein ceh-36, zip-8 - protein zip-8, mls-2 - protein mls-2, tbx-41 - protein tbx-41, ztf-11 - protein ztf-11, cnd-1 - protein cnd-1, mec-1 - protein mec-1, fkh-2 - protein fkh-2, tbx-11 - protein tbx-11, nhr-277 - protein nhr-277, rga-4 - protein rga-4, tbx-7 - protein tbx-7, nhr-119 - protein nhr-119, vab-3 - protein vab-3, ceh-27 - protein ceh-27, ces-1 - prot…
GO:1990138	neuron projection extension	0.000128	0.0134	4.86	7788	36	490	11	[unc-6 - protein unc-6, egl-46 - protein egl-46, rac-2 - protein rac-2, unc-71 - protein unc-71, dgn-1 - protein dgn-1, vab-3 - protein vab-3, CELE_C08A9.3 - protein c08a9.3, kal-1 - protein kal-1, slt-1 - protein slt-1, unc-5 - protein unc-5, trim-9 - protein trim-9]
GO:0048675	axon extension	0.000128	0.0131	4.86	7788	36	490	11	[unc-6 - protein unc-6, egl-46 - protein egl-46, rac-2 - protein rac-2, dgn-1 - protein dgn-1, unc-71 - protein unc-71, vab-3 - protein vab-3, CELE_C08A9.3 - protein c08a9.3, kal-1 - protein kal-1, slt-1 - protein slt-1, unc-5 - protein unc-5, trim-9 - protein trim-9]
GO:0060560	developmental growth involved in morphogenesis	0.000128	0.0128	4.86	7788	36	490	11	[unc-6 - protein unc-6, egl-46 - protein egl-46, rac-2 - protein rac-2, dgn-1 - protein dgn-1, unc-71 - protein unc-71, vab-3 - protein vab-3, CELE_C08A9.3 - protein c08a9.3, kal-1 - protein kal-1, slt-1 - protein slt-1, unc-5 - protein unc-5, trim-9 - protein trim-9]
GO:0010628	positive regulation of gene expression	0.000129	0.0125	4.56	7788	138	161	13	[ham-1 - protein ham-1, ceh-36 - protein ceh-36, mls-2 - protein mls-2, ttx-1 - protein ttx-1, elt-1 - protein elt-1, hlh-2 - protein hlh-2, taf-1 - protein taf-1, fkh-2 - protein fkh-2, tam-1 - protein tam-1, his-38 - protein his-38, vab-3 - protein vab-3, nhr-67 - protein nhr-67, fax-1 - protein fax-1]
GO:0098609	cell-cell adhesion	0.000141	0.0134	5.16	7788	28	539	10	[cdh-9 - protein cdh-9, nlg-1 - protein nlg-1, ceh-13 - protein ceh-13, fmi-1 - protein fmi-1, cdh-3 - protein cdh-3, unc-71 - protein unc-71, cdh-1 - protein cdh-1, cdh-8 - protein cdh-8, vab-23 - protein vab-23, cdh-4 - protein cdh-4]
GO:1902680	positive regulation of RNA biosynthetic process	0.000145	0.0135	4.88	7788	122	157	12	[ham-1 - protein ham-1, ceh-36 - protein ceh-36, mls-2 - protein mls-2, his-38 - protein his-38, ttx-1 - protein ttx-1, vab-3 - protein vab-3, elt-1 - protein elt-1, hlh-2 - protein hlh-2, nhr-67 - protein nhr-67, fax-1 - protein fax-1, taf-1 - protein taf-1, fkh-2 - protein fkh-2]
GO:0045893	positive regulation of transcription, DNA-templated	0.000145	0.0132	4.88	7788	122	157	12	[ham-1 - protein ham-1, ceh-36 - protein ceh-36, mls-2 - protein mls-2, his-38 - protein his-38, ttx-1 - protein ttx-1, vab-3 - protein vab-3, elt-1 - protein elt-1, hlh-2 - protein hlh-2, nhr-67 - protein nhr-67, fax-1 - protein fax-1, taf-1 - protein taf-1, fkh-2 - protein fkh-2]
GO:1903508	positive regulation of nucleic acid-templated transcription	0.000145	0.0129	4.88	7788	122	157	12	[ham-1 - protein ham-1, ceh-36 - protein ceh-36, mls-2 - protein mls-2, his-38 - protein his-38, ttx-1 - protein ttx-1, vab-3 - protein vab-3, elt-1 - protein elt-1, hlh-2 - protein hlh-2, nhr-67 - protein nhr-67, fax-1 - protein fax-1, taf-1 - protein taf-1, fkh-2 - protein fkh-2]
GO:0030182	neuron differentiation	0.000147	0.0128	6.14	7788	16	634	8	[mls-2 - protein mls-2, egl-46 - protein egl-46, lin-44 - protein lin-44, unc-30 - protein unc-30, cnd-1 - protein cnd-1, ast-1 - protein ast-1, hlh-3 - protein hlh-3, cfi-1 - protein cfi-1]
GO:0007610	behavior	0.000153	0.0131	1.99	7788	433	370	41	[ceh-37 - protein ceh-37, lin-12 - protein lin-12, mec-12 - protein mec-12, nrde-3 - protein nrde-3, lat-1 - protein lat-1, ttx-1 - protein ttx-1, lag-2 - protein lag-2, ast-1 - protein ast-1, cnd-1 - protein cnd-1, lin-1 - protein lin-1, mec-1 - protein mec-1, mec-2 - protein mec-2, cog-1 - protein cog-1, trim-9 - protein trim-9, C36E6.2 - protein c36e6.2, che-2 - protein che-2, unc-53 - protein…
GO:0009653	anatomical structure morphogenesis	0.000154	0.0129	2.7	7788	683	93	22	[sox-2 - protein sox-2, lin-12 - protein lin-12, ndg-4 - protein ndg-4, vab-2 - protein vab-2, ceh-13 - protein ceh-13, Y52B11B.1 - protein y52b11b.1, elt-1 - protein elt-1, hlh-2 - protein hlh-2, klp-20 - protein klp-20, apx-1 - protein apx-1, unc-5 - protein unc-5, taf-1 - protein taf-1, unc-53 - protein unc-53, tbx-8 - protein tbx-8, ceh-27 - protein ceh-27, vab-3 - protein vab-3, dgn-1 - prot…
GO:0051254	positive regulation of RNA metabolic process	0.000157	0.0129	4.84	7788	123	157	12	[ham-1 - protein ham-1, ceh-36 - protein ceh-36, mls-2 - protein mls-2, his-38 - protein his-38, ttx-1 - protein ttx-1, vab-3 - protein vab-3, elt-1 - protein elt-1, hlh-2 - protein hlh-2, nhr-67 - protein nhr-67, fax-1 - protein fax-1, taf-1 - protein taf-1, fkh-2 - protein fkh-2]
GO:0048588	developmental cell growth	0.00017	0.0137	4.73	7788	37	490	11	[unc-6 - protein unc-6, egl-46 - protein egl-46, rac-2 - protein rac-2, dgn-1 - protein dgn-1, unc-71 - protein unc-71, vab-3 - protein vab-3, CELE_C08A9.3 - protein c08a9.3, kal-1 - protein kal-1, slt-1 - protein slt-1, unc-5 - protein unc-5, trim-9 - protein trim-9]
GO:0008078	mesodermal cell migration	0.000178	0.0141	12.21	7788	10	319	5	[unc-6 - protein unc-6, unc-53 - protein unc-53, vab-8 - protein vab-8, mig-10 - protein mig-10, unc-5 - protein unc-5]
GO:0014018	neuroblast fate specification	0.00019	0.0148	28.92	7788	4	202	3	[hlh-14 - protein hlh-14, pag-3 - protein pag-3, hlh-2 - protein hlh-2]
GO:0048866	stem cell fate specification	0.00019	0.0145	28.92	7788	4	202	3	[hlh-14 - protein hlh-14, pag-3 - protein pag-3, hlh-2 - protein hlh-2]
GO:0006351	transcription, DNA-templated	0.000191	0.0144	3.3	7788	444	85	16	[tbx-43 - protein tbx-43, fkh-3 - protein fkh-3, tbx-41 - protein tbx-41, elt-1 - protein elt-1, cnd-1 - protein cnd-1, hlh-2 - protein hlh-2, fkh-2 - protein fkh-2, tbx-11 - protein tbx-11, tbx-8 - protein tbx-8, nhr-277 - protein nhr-277, tbx-31 - protein tbx-31, tbx-7 - protein tbx-7, nhr-119 - protein nhr-119, ceh-27 - protein ceh-27, vab-3 - protein vab-3, nhr-2 - protein nhr-2]
GO:0098742	cell-cell adhesion via plasma-membrane adhesion molecules	0.000206	0.0152	6.53	7788	12	696	7	[cdh-9 - protein cdh-9, cdh-10 - protein cdh-10, fmi-1 - protein fmi-1, cdh-3 - protein cdh-3, cdh-1 - protein cdh-1, cdh-8 - protein cdh-8, cdh-4 - protein cdh-4]
GO:0007156	homophilic cell adhesion via plasma membrane adhesion molecules	0.000206	0.015	6.53	7788	12	696	7	[cdh-9 - protein cdh-9, cdh-10 - protein cdh-10, cdh-3 - protein cdh-3, fmi-1 - protein fmi-1, cdh-1 - protein cdh-1, cdh-8 - protein cdh-8, cdh-4 - protein cdh-4]
GO:0048869	cellular developmental process	0.00021	0.015	1.46	7788	559	1034	108	[lin-32 - protein lin-32, syp-1 - protein syp-1, cnd-1 - protein cnd-1, his-24 - protein his-24, mex-3 - protein mex-3, C35D10.13 - protein c35d10.13, ref-2 - protein ref-2, unc-4 - protein unc-4, mom-2 - protein mom-2, dsh-2 - protein dsh-2, tap-1 - protein tap-1, eri-1 - protein eri-1, kpc-1 - protein kpc-1, pes-1 - protein pes-1, ttx-3 - protein ttx-3, asfl-1 - protein asfl-1, elt-1 - protein …
GO:0097659	nucleic acid-templated transcription	0.000211	0.0148	3.27	7788	448	85	16	[tbx-43 - protein tbx-43, fkh-3 - protein fkh-3, tbx-41 - protein tbx-41, elt-1 - protein elt-1, cnd-1 - protein cnd-1, hlh-2 - protein hlh-2, fkh-2 - protein fkh-2, tbx-11 - protein tbx-11, tbx-8 - protein tbx-8, nhr-277 - protein nhr-277, tbx-31 - protein tbx-31, tbx-7 - protein tbx-7, nhr-119 - protein nhr-119, ceh-27 - protein ceh-27, vab-3 - protein vab-3, nhr-2 - protein nhr-2]
GO:0033563	dorsal/ventral axon guidance	0.00023	0.0159	4.33	7788	18	1000	10	[unc-129 - protein unc-129, lad-2 - protein lad-2, unc-6 - protein unc-6, sax-3 - protein sax-3, rac-2 - protein rac-2, unc-30 - protein unc-30, slt-1 - protein slt-1, unc-5 - protein unc-5, tag-333 - protein tag-333, trim-9 - protein trim-9]
GO:0031323	regulation of cellular metabolic process	0.000267	0.0181	2.45	7788	899	85	24	[ham-1 - protein ham-1, tbx-43 - protein tbx-43, ceh-36 - protein ceh-36, fkh-3 - protein fkh-3, zip-8 - protein zip-8, tbx-41 - protein tbx-41, mls-2 - protein mls-2, elt-1 - protein elt-1, ztf-11 - protein ztf-11, cnd-1 - protein cnd-1, hlh-2 - protein hlh-2, taf-1 - protein taf-1, fkh-2 - protein fkh-2, tbx-11 - protein tbx-11, tbx-8 - protein tbx-8, nhr-277 - protein nhr-277, tbx-31 - protein…
GO:0010604	positive regulation of macromolecule metabolic process	0.000313	0.0209	3.47	7788	195	161	14	[ham-1 - protein ham-1, ceh-36 - protein ceh-36, mls-2 - protein mls-2, ttx-1 - protein ttx-1, elt-1 - protein elt-1, hlh-2 - protein hlh-2, taf-1 - protein taf-1, fkh-2 - protein fkh-2, tam-1 - protein tam-1, his-38 - protein his-38, vab-3 - protein vab-3, nhr-67 - protein nhr-67, fax-1 - protein fax-1, B0198.3 - protein b0198.3]
GO:0016331	morphogenesis of embryonic epithelium	0.000321	0.0211	8.05	7788	12	484	6	[die-1 - protein die-1, cdh-3 - protein cdh-3, arx-4 - protein arx-4, vab-1 - protein vab-1, apx-1 - protein apx-1, efn-4 - protein efn-4]
GO:0010557	positive regulation of macromolecule biosynthetic process	0.000336	0.0217	4.48	7788	133	157	12	[ham-1 - protein ham-1, ceh-36 - protein ceh-36, mls-2 - protein mls-2, his-38 - protein his-38, ttx-1 - protein ttx-1, vab-3 - protein vab-3, elt-1 - protein elt-1, hlh-2 - protein hlh-2, nhr-67 - protein nhr-67, fax-1 - protein fax-1, taf-1 - protein taf-1, fkh-2 - protein fkh-2]
GO:0030154	cell differentiation	0.000357	0.0228	16.86	7788	154	12	4	[lin-12 - protein lin-12, mls-2 - protein mls-2, xol-1 - protein xol-1, cnd-1 - protein cnd-1]
GO:0045935	positive regulation of nucleobase-containing compound metabolic process	0.000362	0.0228	4.44	7788	134	157	12	[ham-1 - protein ham-1, ceh-36 - protein ceh-36, mls-2 - protein mls-2, his-38 - protein his-38, ttx-1 - protein ttx-1, vab-3 - protein vab-3, elt-1 - protein elt-1, hlh-2 - protein hlh-2, nhr-67 - protein nhr-67, fax-1 - protein fax-1, taf-1 - protein taf-1, fkh-2 - protein fkh-2]
GO:0016049	cell growth	0.000377	0.0233	4.37	7788	40	490	11	[unc-6 - protein unc-6, egl-46 - protein egl-46, rac-2 - protein rac-2, unc-71 - protein unc-71, dgn-1 - protein dgn-1, vab-3 - protein vab-3, CELE_C08A9.3 - protein c08a9.3, kal-1 - protein kal-1, slt-1 - protein slt-1, unc-5 - protein unc-5, trim-9 - protein trim-9]
GO:0001667	ameboidal-type cell migration	0.000517	0.0316	6.83	7788	22	363	7	[unc-6 - protein unc-6, unc-53 - protein unc-53, vab-8 - protein vab-8, arx-4 - protein arx-4, mig-10 - protein mig-10, unc-5 - protein unc-5, efn-4 - protein efn-4]
GO:0034654	nucleobase-containing compound biosynthetic process	0.00052	0.0313	2.81	7788	587	85	18	[tbx-43 - protein tbx-43, fkh-3 - protein fkh-3, tbx-41 - protein tbx-41, elt-1 - protein elt-1, hlh-2 - protein hlh-2, cnd-1 - protein cnd-1, taf-1 - protein taf-1, fkh-2 - protein fkh-2, tbx-11 - protein tbx-11, ref-2 - protein ref-2, tbx-8 - protein tbx-8, nhr-277 - protein nhr-277, tbx-31 - protein tbx-31, tbx-7 - protein tbx-7, nhr-119 - protein nhr-119, ceh-27 - protein ceh-27, vab-3 - prot…
GO:0045597	positive regulation of cell differentiation	0.00052	0.0309	36	7788	11	59	3	[unc-53 - protein unc-53, hlh-2 - protein hlh-2, unc-5 - protein unc-5]
GO:0009891	positive regulation of biosynthetic process	0.000646	0.0378	4.19	7788	142	157	12	[ham-1 - protein ham-1, ceh-36 - protein ceh-36, mls-2 - protein mls-2, his-38 - protein his-38, ttx-1 - protein ttx-1, vab-3 - protein vab-3, elt-1 - protein elt-1, hlh-2 - protein hlh-2, nhr-67 - protein nhr-67, fax-1 - protein fax-1, taf-1 - protein taf-1, fkh-2 - protein fkh-2]
GO:0031328	positive regulation of cellular biosynthetic process	0.000646	0.0373	4.19	7788	142	157	12	[ham-1 - protein ham-1, ceh-36 - protein ceh-36, mls-2 - protein mls-2, his-38 - protein his-38, ttx-1 - protein ttx-1, vab-3 - protein vab-3, elt-1 - protein elt-1, hlh-2 - protein hlh-2, nhr-67 - protein nhr-67, fax-1 - protein fax-1, taf-1 - protein taf-1, fkh-2 - protein fkh-2]
GO:0048730	epidermis morphogenesis	0.000663	0.0378	13.57	7788	8	287	4	[vab-2 - protein vab-2, kal-1 - protein kal-1, vab-23 - protein vab-23, gpn-1 - protein gpn-1]
GO:0065007	biological regulation	0.000672	0.0378	1.87	7788	2850	41	28	[ceh-36 - protein ceh-36, R04A9.7 - protein r04a9.7, lin-12 - protein lin-12, cfz-2 - protein cfz-2, zip-8 - protein zip-8, mls-2 - protein mls-2, ztf-11 - protein ztf-11, cnd-1 - protein cnd-1, lin-65 - protein lin-65, apx-1 - protein apx-1, unc-5 - protein unc-5, tbx-11 - protein tbx-11, abts-4 - protein abts-4, nhr-277 - protein nhr-277, vab-3 - protein vab-3, ceh-27 - protein ceh-27, xol-1 - …
GO:0051173	positive regulation of nitrogen compound metabolic process	0.000687	0.0381	4.16	7788	143	157	12	[ham-1 - protein ham-1, ceh-36 - protein ceh-36, mls-2 - protein mls-2, his-38 - protein his-38, ttx-1 - protein ttx-1, vab-3 - protein vab-3, elt-1 - protein elt-1, hlh-2 - protein hlh-2, nhr-67 - protein nhr-67, fax-1 - protein fax-1, taf-1 - protein taf-1, fkh-2 - protein fkh-2]
GO:0030335	positive regulation of cell migration	0.000708	0.0388	46.36	7788	2	168	2	[unc-53 - protein unc-53, mig-13 - protein mig-13]
GO:0085029	extracellular matrix assembly	0.00077	0.0417	1298	7788	1	6	1	[ten-1 - protein ten-1]
GO:2001197	basement membrane assembly involved in embryonic body morphogenesis	0.00077	0.0412	1298	7788	1	6	1	[ten-1 - protein ten-1]
GO:0070831	basement membrane assembly	0.00077	0.0407	1298	7788	1	6	1	[ten-1 - protein ten-1]
GO:0016070	RNA metabolic process	0.00078	0.0407	2.54	7788	721	85	20	[tbx-43 - protein tbx-43, fkh-3 - protein fkh-3, tbx-41 - protein tbx-41, elt-1 - protein elt-1, hlh-2 - protein hlh-2, cnd-1 - protein cnd-1, taf-1 - protein taf-1, fkh-2 - protein fkh-2, tbx-11 - protein tbx-11, ref-2 - protein ref-2, tbx-8 - protein tbx-8, nhr-277 - protein nhr-277, tbx-31 - protein tbx-31, tbx-7 - protein tbx-7, nhr-119 - protein nhr-119, ceh-27 - protein ceh-27, vab-3 - prot…
GO:0019438	aromatic compound biosynthetic process	0.0008	0.0412	2.72	7788	606	85	18	[tbx-43 - protein tbx-43, fkh-3 - protein fkh-3, tbx-41 - protein tbx-41, elt-1 - protein elt-1, hlh-2 - protein hlh-2, cnd-1 - protein cnd-1, taf-1 - protein taf-1, fkh-2 - protein fkh-2, tbx-11 - protein tbx-11, ref-2 - protein ref-2, tbx-8 - protein tbx-8, nhr-277 - protein nhr-277, tbx-31 - protein tbx-31, tbx-7 - protein tbx-7, nhr-119 - protein nhr-119, ceh-27 - protein ceh-27, vab-3 - prot…
GO:0010770	positive regulation of cell morphogenesis involved in differentiation	0.00093	0.0473	66	7788	4	59	2	[unc-53 - protein unc-53, unc-5 - protein unc-5]
GO:0010976	positive regulation of neuron projection development	0.00093	0.0467	66	7788	4	59	2	[unc-53 - protein unc-53, unc-5 - protein unc-5]
GO:0045773	positive regulation of axon extension	0.00093	0.0462	66	7788	4	59	2	[unc-53 - protein unc-53, unc-5 - protein unc-5]
GO:0050772	positive regulation of axonogenesis	0.00093	0.0457	66	7788	4	59	2	[unc-53 - protein unc-53, unc-5 - protein unc-5]
GO:0031346	positive regulation of cell projection organization	0.00093	0.0452	66	7788	4	59	2	[unc-53 - protein unc-53, unc-5 - protein unc-5]
GO:0050877	neurological system process	0.000964	0.0463	1.32	7788	137	4096	95	[mec-5 - protein mec-5, srg-69 - protein srg-69, odr-10 - protein odr-10, ceh-36 - protein ceh-36, sre-54 - protein sre-54, gur-3 - protein gur-3, mec-12 - protein mec-12, srg-2 - protein srg-2, nrde-3 - protein nrde-3, sre-51 - protein sre-51, tyra-3 - protein tyra-3, mec-8 - protein mec-8, odr-7 - protein odr-7, sra-25 - protein sra-25, srg-53 - protein srg-53, glr-1 - protein glr-1, srg-66 - p…
GO:0018130	heterocycle biosynthetic process	0.000969	0.0461	2.67	7788	617	85	18	[tbx-43 - protein tbx-43, fkh-3 - protein fkh-3, tbx-41 - protein tbx-41, elt-1 - protein elt-1, hlh-2 - protein hlh-2, cnd-1 - protein cnd-1, taf-1 - protein taf-1, fkh-2 - protein fkh-2, tbx-11 - protein tbx-11, ref-2 - protein ref-2, tbx-8 - protein tbx-8, nhr-277 - protein nhr-277, tbx-31 - protein tbx-31, tbx-7 - protein tbx-7, nhr-119 - protein nhr-119, ceh-27 - protein ceh-27, vab-3 - prot…
GO:0044708	single-organism behavior	0.000989	0.0465	1.8	7788	87	1888	38	[mec-5 - protein mec-5, mksr-2 - protein mksr-2, odr-10 - protein odr-10, ceh-37 - protein ceh-37, lin-12 - protein lin-12, mec-12 - protein mec-12, nrde-3 - protein nrde-3, ttx-1 - protein ttx-1, lag-2 - protein lag-2, mec-1 - protein mec-1, mec-2 - protein mec-2, mks-1 - protein mks-1, dcr-1 - protein dcr-1, mksr-1 - protein mksr-1, che-2 - protein che-2, tax-4 - protein tax-4, gcy-23 - protein…
