# Supplementary material for: Chromatin accessibility dynamics reveal novel functional enhancers in C. elegans
Source: Genome Res. 2017 Dec;27(12):2096–107. doi: 10.1101/gr.226233.117 (PMC5741055; doi:10.1101/gr.226233.117)
Supplement: Supplemental Material [file supp_gr.226233.117_Supplemental_Table_S5.xlsx]

## Sheet: S5 - L3 more access. vs EE - BP
GO Term	Description	P-value	FDR q-value	Enrichment	N	B	n	b	Genes
GO:0065007	biological regulation	5.87e-15	2.51e-11	1.53	7788	2850	463	259	[nhr-14 - protein nhr-14, ttr-48 - protein ttr-48, nhr-3 - protein nhr-3, spsb-1 - protein spsb-1, hlh-11 - protein hlh-11, klf-3 - protein klf-3, lbp-9 - protein lbp-9, srp-7 - protein srp-7, dve-1 - protein dve-1, CELE_C17E4.6 - protein c17e4.6, peb-1 - protein peb-1, F27C1.2 - protein f27c1.2, lpin-1 - protein lpin-1, jph-1 - protein jph-1, tnt-2 - protein tnt-2, K05F1.6 - protein k05f1.6, spt…
GO:0050789	regulation of biological process	2.42e-14	5.17e-11	1.86	7788	2464	228	134	[nhr-14 - protein nhr-14, nhr-3 - protein nhr-3, spsb-1 - protein spsb-1, hlh-11 - protein hlh-11, pde-4 - protein pde-4, peb-1 - protein peb-1, lpin-1 - protein lpin-1, crh-1 - protein crh-1, jph-1 - protein jph-1, sma-5 - protein sma-5, tnt-2 - protein tnt-2, vab-10 - protein vab-10, eps-8 - protein eps-8, lin-59 - protein lin-59, egl-19 - protein egl-19, hbl-1 - protein hbl-1, nhr-88 - protein…
GO:0048518	positive regulation of biological process	4.3e-14	6.12e-11	2.85	7788	766	228	64	[mig-15 - protein mig-15, egl-10 - protein egl-10, pac-1 - protein pac-1, blmp-1 - protein blmp-1, peb-1 - protein peb-1, crh-1 - protein crh-1, lpin-1 - protein lpin-1, daf-12 - protein daf-12, sma-5 - protein sma-5, jph-1 - protein jph-1, eps-8 - protein eps-8, sma-2 - protein sma-2, crtc-1 - protein crtc-1, atf-7 - protein atf-7, let-2 - protein let-2, gld-2 - protein gld-2, unc-43 - protein u…
GO:0050794	regulation of cellular process	2.45e-13	2.62e-10	1.99	7788	1982	227	115	[nhr-14 - protein nhr-14, nhr-3 - protein nhr-3, spsb-1 - protein spsb-1, hlh-11 - protein hlh-11, pde-4 - protein pde-4, crh-1 - protein crh-1, lpin-1 - protein lpin-1, jph-1 - protein jph-1, vab-10 - protein vab-10, eps-8 - protein eps-8, lin-59 - protein lin-59, egl-19 - protein egl-19, hbl-1 - protein hbl-1, nhr-88 - protein nhr-88, dmd-6 - protein dmd-6, nhr-40 - protein nhr-40, npr-5 - prot…
GO:0051239	regulation of multicellular organismal process	1.94e-12	1.66e-09	2.58	7788	603	340	68	[lin-42 - protein lin-42, egl-30 - protein egl-30, egl-10 - protein egl-10, pac-1 - protein pac-1, CELE_C17E4.6 - protein c17e4.6, blmp-1 - protein blmp-1, dbl-1 - protein dbl-1, dyc-1 - protein dyc-1, sma-5 - protein sma-5, tnt-2 - protein tnt-2, nhr-23 - protein nhr-23, eps-8 - protein eps-8, sma-2 - protein sma-2, alg-1 - protein alg-1, let-2 - protein let-2, unc-43 - protein unc-43, CELE_T26A…
GO:0009791	post-embryonic development	2.41e-12	1.72e-09	1.16	7788	1469	4244	927	[homt-1 - protein homt-1, pri-1 - protein pri-1, rpl-7 - protein rpl-7, C07A9.2 - protein c07a9.2, dars-1 - protein dars-1, B0464.2 - protein b0464.2, vha-14 - protein vha-14, ifb-1 - protein ifb-1, tiar-1 - protein tiar-1, taf-4 - protein taf-4, rgr-1 - protein rgr-1, gpr-2 - protein gpr-2, spk-1 - protein spk-1, B0464.6 - protein b0464.6, deps-1 - protein deps-1, lpr-1 - protein lpr-1, Y65B4BR.…
GO:2001141	regulation of RNA biosynthetic process	4.58e-12	2.8e-09	2.24	7788	646	463	86	[lin-42 - protein lin-42, nhr-14 - protein nhr-14, ceh-18 - protein ceh-18, nhr-3 - protein nhr-3, fkh-9 - protein fkh-9, hlh-11 - protein hlh-11, dbl-1 - protein dbl-1, CELE_C17E4.6 - protein c17e4.6, blmp-1 - protein blmp-1, crh-1 - protein crh-1, lpin-1 - protein lpin-1, daf-12 - protein daf-12, nhr-23 - protein nhr-23, egl-27 - protein egl-27, nhr-137 - protein nhr-137, sptf-3 - protein sptf-…
GO:1903506	regulation of nucleic acid-templated transcription	4.58e-12	2.45e-09	2.24	7788	646	463	86	[lin-42 - protein lin-42, nhr-14 - protein nhr-14, ceh-18 - protein ceh-18, nhr-3 - protein nhr-3, fkh-9 - protein fkh-9, hlh-11 - protein hlh-11, dbl-1 - protein dbl-1, CELE_C17E4.6 - protein c17e4.6, blmp-1 - protein blmp-1, crh-1 - protein crh-1, lpin-1 - protein lpin-1, daf-12 - protein daf-12, nhr-23 - protein nhr-23, egl-27 - protein egl-27, nhr-137 - protein nhr-137, sptf-3 - protein sptf-…
GO:0006355	regulation of transcription, DNA-templated	7.1e-12	3.37e-09	2.23	7788	640	463	85	[lin-42 - protein lin-42, nhr-14 - protein nhr-14, ceh-18 - protein ceh-18, nhr-3 - protein nhr-3, fkh-9 - protein fkh-9, hlh-11 - protein hlh-11, dbl-1 - protein dbl-1, CELE_C17E4.6 - protein c17e4.6, blmp-1 - protein blmp-1, crh-1 - protein crh-1, lpin-1 - protein lpin-1, daf-12 - protein daf-12, nhr-23 - protein nhr-23, egl-27 - protein egl-27, nhr-137 - protein nhr-137, sptf-3 - protein sptf-…
GO:0006357	regulation of transcription from RNA polymerase II promoter	7.41e-12	3.17e-09	3.28	7788	234	456	45	[lin-42 - protein lin-42, nhr-69 - protein nhr-69, hlh-11 - protein hlh-11, fkh-9 - protein fkh-9, ire-1 - protein ire-1, dbl-1 - protein dbl-1, blmp-1 - protein blmp-1, daf-5 - protein daf-5, crh-1 - protein crh-1, lpin-1 - protein lpin-1, daf-12 - protein daf-12, skn-1 - protein skn-1, egl-27 - protein egl-27, fkh-7 - protein fkh-7, sptf-3 - protein sptf-3, tag-97 - protein tag-97, crtc-1 - pro…
GO:0002164	larval development	9.38e-12	3.64e-09	1.15	7788	1459	4244	918	[homt-1 - protein homt-1, pri-1 - protein pri-1, rpl-7 - protein rpl-7, C07A9.2 - protein c07a9.2, dars-1 - protein dars-1, B0464.2 - protein b0464.2, vha-14 - protein vha-14, ifb-1 - protein ifb-1, tiar-1 - protein tiar-1, taf-4 - protein taf-4, rgr-1 - protein rgr-1, gpr-2 - protein gpr-2, spk-1 - protein spk-1, B0464.6 - protein b0464.6, deps-1 - protein deps-1, lpr-1 - protein lpr-1, Y65B4BR.…
GO:0051252	regulation of RNA metabolic process	1.13e-11	4.03e-09	2.2	7788	657	463	86	[lin-42 - protein lin-42, nhr-14 - protein nhr-14, ceh-18 - protein ceh-18, nhr-3 - protein nhr-3, fkh-9 - protein fkh-9, hlh-11 - protein hlh-11, dbl-1 - protein dbl-1, CELE_C17E4.6 - protein c17e4.6, blmp-1 - protein blmp-1, crh-1 - protein crh-1, lpin-1 - protein lpin-1, daf-12 - protein daf-12, nhr-23 - protein nhr-23, egl-27 - protein egl-27, nhr-137 - protein nhr-137, sptf-3 - protein sptf-…
GO:0002119	nematode larval development	1.2e-11	3.94e-09	1.15	7788	1458	4244	917	[homt-1 - protein homt-1, pri-1 - protein pri-1, rpl-7 - protein rpl-7, C07A9.2 - protein c07a9.2, dars-1 - protein dars-1, B0464.2 - protein b0464.2, vha-14 - protein vha-14, ifb-1 - protein ifb-1, tiar-1 - protein tiar-1, taf-4 - protein taf-4, rgr-1 - protein rgr-1, gpr-2 - protein gpr-2, spk-1 - protein spk-1, B0464.6 - protein b0464.6, deps-1 - protein deps-1, lpr-1 - protein lpr-1, Y65B4BR.…
GO:0019219	regulation of nucleobase-containing compound metabolic process	2.15e-11	6.55e-09	2.15	7788	688	463	88	[lin-42 - protein lin-42, nhr-14 - protein nhr-14, ceh-18 - protein ceh-18, nhr-3 - protein nhr-3, fkh-9 - protein fkh-9, hlh-11 - protein hlh-11, dbl-1 - protein dbl-1, CELE_C17E4.6 - protein c17e4.6, blmp-1 - protein blmp-1, crh-1 - protein crh-1, lpin-1 - protein lpin-1, daf-12 - protein daf-12, nhr-23 - protein nhr-23, egl-27 - protein egl-27, nhr-137 - protein nhr-137, sptf-3 - protein sptf-…
GO:0051094	positive regulation of developmental process	3.48e-11	9.9e-09	2.79	7788	327	461	54	[dbl-1 - protein dbl-1, blmp-1 - protein blmp-1, F27C1.2 - protein f27c1.2, dve-1 - protein dve-1, sma-5 - protein sma-5, nhr-23 - protein nhr-23, eps-8 - protein eps-8, sma-2 - protein sma-2, lin-49 - protein lin-49, alg-1 - protein alg-1, let-2 - protein let-2, unc-43 - protein unc-43, CELE_T26A8.4 - protein t26a8.4, rpl-22 - protein rpl-22, nhr-40 - protein nhr-40, ntl-2 - protein ntl-2, unc-4…
GO:0080090	regulation of primary metabolic process	3.67e-11	9.8e-09	2.47	7788	888	227	64	[ife-3 - protein ife-3, lin-42 - protein lin-42, nhr-14 - protein nhr-14, mig-15 - protein mig-15, nhr-3 - protein nhr-3, hlh-11 - protein hlh-11, fkh-9 - protein fkh-9, T28C12.6 - protein t28c12.6, blmp-1 - protein blmp-1, crh-1 - protein crh-1, lpin-1 - protein lpin-1, daf-12 - protein daf-12, egl-27 - protein egl-27, sma-2 - protein sma-2, atf-7 - protein atf-7, crtc-1 - protein crtc-1, lin-59…
GO:0009889	regulation of biosynthetic process	4.42e-11	1.11e-08	2.69	7788	715	227	56	[ife-3 - protein ife-3, nhr-14 - protein nhr-14, lin-42 - protein lin-42, nhr-3 - protein nhr-3, hlh-11 - protein hlh-11, fkh-9 - protein fkh-9, blmp-1 - protein blmp-1, lpin-1 - protein lpin-1, crh-1 - protein crh-1, daf-12 - protein daf-12, egl-27 - protein egl-27, sma-2 - protein sma-2, crtc-1 - protein crtc-1, atf-7 - protein atf-7, unc-62 - protein unc-62, lin-59 - protein lin-59, hbl-1 - pr…
GO:0031326	regulation of cellular biosynthetic process	4.42e-11	1.05e-08	2.69	7788	715	227	56	[ife-3 - protein ife-3, nhr-14 - protein nhr-14, lin-42 - protein lin-42, nhr-3 - protein nhr-3, hlh-11 - protein hlh-11, fkh-9 - protein fkh-9, blmp-1 - protein blmp-1, lpin-1 - protein lpin-1, crh-1 - protein crh-1, daf-12 - protein daf-12, egl-27 - protein egl-27, sma-2 - protein sma-2, crtc-1 - protein crtc-1, atf-7 - protein atf-7, unc-62 - protein unc-62, lin-59 - protein lin-59, nhr-88 - p…
GO:0050793	regulation of developmental process	5.2e-11	1.17e-08	2.47	7788	628	326	65	[lin-42 - protein lin-42, pac-1 - protein pac-1, CELE_C17E4.6 - protein c17e4.6, blmp-1 - protein blmp-1, dbl-1 - protein dbl-1, daf-12 - protein daf-12, mdl-1 - protein mdl-1, sma-5 - protein sma-5, eps-8 - protein eps-8, nhr-23 - protein nhr-23, sma-2 - protein sma-2, alg-1 - protein alg-1, let-2 - protein let-2, unc-43 - protein unc-43, CELE_T26A8.4 - protein t26a8.4, fos-1 - protein fos-1, li…
GO:0040011	locomotion	6.01e-11	1.28e-08	1.48	7788	1267	1031	248	[dpy-3 - protein dpy-3, coq-1 - protein coq-1, klf-3 - protein klf-3, F45E4.3 - protein f45e4.3, aakg-5 - protein aakg-5, gei-13 - protein gei-13, ehs-1 - protein ehs-1, peb-1 - protein peb-1, snap-1 - protein snap-1, C07A9.2 - protein c07a9.2, rab-3 - protein rab-3, lpin-1 - protein lpin-1, tnt-2 - protein tnt-2, jph-1 - protein jph-1, sptf-3 - protein sptf-3, eor-2 - protein eor-2, rpt-4 - prot…
GO:0031323	regulation of cellular metabolic process	6.52e-11	1.33e-08	2.44	7788	899	227	64	[ife-3 - protein ife-3, lin-42 - protein lin-42, nhr-14 - protein nhr-14, mig-15 - protein mig-15, nhr-3 - protein nhr-3, fkh-9 - protein fkh-9, hlh-11 - protein hlh-11, T28C12.6 - protein t28c12.6, blmp-1 - protein blmp-1, crh-1 - protein crh-1, lpin-1 - protein lpin-1, daf-12 - protein daf-12, egl-27 - protein egl-27, sma-2 - protein sma-2, atf-7 - protein atf-7, crtc-1 - protein crtc-1, lin-59…
GO:0051171	regulation of nitrogen compound metabolic process	1.32e-10	2.56e-08	2.62	7788	733	227	56	[ife-3 - protein ife-3, nhr-14 - protein nhr-14, lin-42 - protein lin-42, nhr-3 - protein nhr-3, hlh-11 - protein hlh-11, fkh-9 - protein fkh-9, blmp-1 - protein blmp-1, lpin-1 - protein lpin-1, crh-1 - protein crh-1, daf-12 - protein daf-12, egl-27 - protein egl-27, sma-2 - protein sma-2, crtc-1 - protein crtc-1, atf-7 - protein atf-7, unc-62 - protein unc-62, lin-59 - protein lin-59, hbl-1 - pr…
GO:0051240	positive regulation of multicellular organismal process	1.32e-10	2.45e-08	2.73	7788	328	461	53	[blmp-1 - protein blmp-1, dbl-1 - protein dbl-1, F27C1.2 - protein f27c1.2, dve-1 - protein dve-1, sma-5 - protein sma-5, nhr-23 - protein nhr-23, eps-8 - protein eps-8, sma-2 - protein sma-2, lin-49 - protein lin-49, alg-1 - protein alg-1, let-2 - protein let-2, unc-43 - protein unc-43, CELE_T26A8.4 - protein t26a8.4, rpl-22 - protein rpl-22, nhr-40 - protein nhr-40, ntl-2 - protein ntl-2, let-6…
GO:0040014	regulation of multicellular organism growth	1.33e-10	2.37e-08	2.86	7788	289	461	49	[blmp-1 - protein blmp-1, dbl-1 - protein dbl-1, F27C1.2 - protein f27c1.2, sma-5 - protein sma-5, nhr-23 - protein nhr-23, sma-2 - protein sma-2, alg-1 - protein alg-1, let-2 - protein let-2, unc-43 - protein unc-43, CELE_T26A8.4 - protein t26a8.4, lin-59 - protein lin-59, rpl-22 - protein rpl-22, nhr-40 - protein nhr-40, ntl-2 - protein ntl-2, let-607 - protein let-607, unc-44 - protein unc-44,…
GO:0010556	regulation of macromolecule biosynthetic process	1.42e-10	2.44e-08	2.09	7788	699	463	87	[ife-3 - protein ife-3, lin-42 - protein lin-42, nhr-14 - protein nhr-14, ceh-18 - protein ceh-18, nhr-3 - protein nhr-3, fkh-9 - protein fkh-9, hlh-11 - protein hlh-11, dbl-1 - protein dbl-1, blmp-1 - protein blmp-1, CELE_C17E4.6 - protein c17e4.6, crh-1 - protein crh-1, lpin-1 - protein lpin-1, daf-12 - protein daf-12, nhr-23 - protein nhr-23, egl-27 - protein egl-27, nhr-137 - protein nhr-137,…
GO:0048638	regulation of developmental growth	1.63e-10	2.68e-08	3.24	7788	302	326	41	[nkb-1 - protein nkb-1, ire-1 - protein ire-1, blmp-1 - protein blmp-1, dbl-1 - protein dbl-1, pqn-47 - protein pqn-47, sma-5 - protein sma-5, skn-1 - protein skn-1, nhr-23 - protein nhr-23, unc-76 - protein unc-76, sma-2 - protein sma-2, alg-1 - protein alg-1, let-2 - protein let-2, vhp-1 - protein vhp-1, unc-43 - protein unc-43, daf-16 - protein daf-16, kin-20 - protein kin-20, CELE_T26A8.4 - p…
GO:2000112	regulation of cellular macromolecule biosynthetic process	2.16e-10	3.42e-08	2.09	7788	693	463	86	[ife-3 - protein ife-3, lin-42 - protein lin-42, nhr-14 - protein nhr-14, ceh-18 - protein ceh-18, nhr-3 - protein nhr-3, fkh-9 - protein fkh-9, hlh-11 - protein hlh-11, dbl-1 - protein dbl-1, blmp-1 - protein blmp-1, CELE_C17E4.6 - protein c17e4.6, crh-1 - protein crh-1, lpin-1 - protein lpin-1, daf-12 - protein daf-12, nhr-23 - protein nhr-23, egl-27 - protein egl-27, nhr-137 - protein nhr-137,…
GO:0040008	regulation of growth	3.79e-10	5.79e-08	3.11	7788	323	326	42	[nkb-1 - protein nkb-1, ire-1 - protein ire-1, blmp-1 - protein blmp-1, peb-1 - protein peb-1, dbl-1 - protein dbl-1, pqn-47 - protein pqn-47, sma-5 - protein sma-5, skn-1 - protein skn-1, nhr-23 - protein nhr-23, unc-76 - protein unc-76, sma-2 - protein sma-2, alg-1 - protein alg-1, let-2 - protein let-2, vhp-1 - protein vhp-1, unc-43 - protein unc-43, daf-16 - protein daf-16, kin-20 - protein k…
GO:0048523	negative regulation of cellular process	5.74e-10	8.46e-08	3.45	7788	358	227	36	[lin-42 - protein lin-42, flh-2 - protein flh-2, egl-10 - protein egl-10, pde-4 - protein pde-4, T28C12.6 - protein t28c12.6, blmp-1 - protein blmp-1, unc-94 - protein unc-94, daf-5 - protein daf-5, pde-6 - protein pde-6, gsa-1 - protein gsa-1, eps-8 - protein eps-8, vab-10 - protein vab-10, sma-2 - protein sma-2, lev-11 - protein lev-11, mai-1 - protein mai-1, atf-7 - protein atf-7, tra-1 - prot…
GO:0008340	determination of adult lifespan	6.62e-10	9.43e-08	1.26	7788	620	3743	376	[lip-1 - protein lip-1, CELE_Y73B3A.1 - protein y73b3a.1, nhr-14 - protein nhr-14, lbp-7 - protein lbp-7, skr-1 - protein skr-1, rpl-19 - protein rpl-19, skr-2 - protein skr-2, bir-2 - protein bir-2, R12B2.6 - protein r12b2.6, atp-3 - protein atp-3, C07A9.2 - protein c07a9.2, dve-1 - protein dve-1, CELE_F52E1.13 - protein f52e1.13, T07A9.9 - protein t07a9.9, dao-5 - protein dao-5, pos-1 - protein…
GO:0040018	positive regulation of multicellular organism growth	7.57e-10	1.04e-07	3.34	7788	265	326	37	[nkb-1 - protein nkb-1, ire-1 - protein ire-1, dbl-1 - protein dbl-1, blmp-1 - protein blmp-1, pqn-47 - protein pqn-47, sma-5 - protein sma-5, skn-1 - protein skn-1, nhr-23 - protein nhr-23, sma-2 - protein sma-2, alg-1 - protein alg-1, let-2 - protein let-2, vhp-1 - protein vhp-1, unc-43 - protein unc-43, kin-20 - protein kin-20, CELE_T26A8.4 - protein t26a8.4, CELE_Y111B2A.12 - protein y111b2a.…
GO:0000003	reproduction	8.67e-10	1.16e-07	1.14	7788	1604	4110	963	[CELE_C47E8.6 - protein c47e8.6, pri-1 - protein pri-1, hcp-3 - protein hcp-3, tbg-1 - protein tbg-1, rpl-7 - protein rpl-7, C07A9.2 - protein c07a9.2, clec-208 - protein clec-208, dars-1 - protein dars-1, vha-14 - protein vha-14, tiar-1 - protein tiar-1, taf-4 - protein taf-4, rgr-1 - protein rgr-1, gpr-2 - protein gpr-2, F54C8.4 - protein f54c8.4, rheb-1 - protein rheb-1, spk-1 - protein spk-1,…
GO:0048639	positive regulation of developmental growth	9.77e-10	1.27e-07	3.31	7788	267	326	37	[nkb-1 - protein nkb-1, ire-1 - protein ire-1, dbl-1 - protein dbl-1, blmp-1 - protein blmp-1, pqn-47 - protein pqn-47, sma-5 - protein sma-5, skn-1 - protein skn-1, nhr-23 - protein nhr-23, sma-2 - protein sma-2, alg-1 - protein alg-1, let-2 - protein let-2, vhp-1 - protein vhp-1, unc-43 - protein unc-43, kin-20 - protein kin-20, CELE_T26A8.4 - protein t26a8.4, CELE_Y111B2A.12 - protein y111b2a.…
GO:0019222	regulation of metabolic process	1.01e-09	1.27e-07	2.16	7788	1126	227	71	[ife-3 - protein ife-3, lin-42 - protein lin-42, nhr-14 - protein nhr-14, mig-15 - protein mig-15, egl-10 - protein egl-10, nhr-3 - protein nhr-3, pac-1 - protein pac-1, hlh-11 - protein hlh-11, fkh-9 - protein fkh-9, T28C12.6 - protein t28c12.6, blmp-1 - protein blmp-1, crh-1 - protein crh-1, lpin-1 - protein lpin-1, daf-12 - protein daf-12, egl-27 - protein egl-27, sma-2 - protein sma-2, atf-7 …
GO:0007610	behavior	1.04e-09	1.26e-07	2.73	7788	433	323	49	[mab-31 - protein mab-31, lin-42 - protein lin-42, mig-15 - protein mig-15, egl-30 - protein egl-30, egl-10 - protein egl-10, unc-15 - protein unc-15, dyc-1 - protein dyc-1, daf-12 - protein daf-12, nhr-23 - protein nhr-23, egl-27 - protein egl-27, unc-49 - protein unc-49, C26B9.3 - protein c26b9.3, unc-43 - protein unc-43, unc-57 - protein unc-57, lin-59 - protein lin-59, unc-62 - protein unc-62…
GO:0016192	vesicle-mediated transport	1.1e-09	1.31e-07	1.23	7788	642	4078	414	[itr-1 - protein itr-1, F30A10.9 - protein f30a10.9, F33D4.5 - protein f33d4.5, eea-1 - protein eea-1, gut-2 - protein gut-2, skr-1 - protein skr-1, tbg-1 - protein tbg-1, ehs-1 - protein ehs-1, C07A9.2 - protein c07a9.2, letm-1 - protein letm-1, dars-1 - protein dars-1, rab-3 - protein rab-3, arl-3 - protein arl-3, ifb-1 - protein ifb-1, sptf-3 - protein sptf-3, sec-15 - protein sec-15, cel-1 - …
GO:0044707	single-multicellular organism process	1.21e-09	1.4e-07	1.75	7788	2256	201	102	[dlg-1 - protein dlg-1, nhr-14 - protein nhr-14, pde-4 - protein pde-4, R12B2.6 - protein r12b2.6, klc-2 - protein klc-2, peb-1 - protein peb-1, crh-1 - protein crh-1, lpin-1 - protein lpin-1, sma-5 - protein sma-5, jph-1 - protein jph-1, vab-10 - protein vab-10, eps-8 - protein eps-8, lin-59 - protein lin-59, egl-19 - protein egl-19, hbl-1 - protein hbl-1, nhr-40 - protein nhr-40, din-1 - protei…
GO:0007165	signal transduction	1.23e-09	1.39e-07	1.73	7788	902	650	130	[mab-31 - protein mab-31, pptr-1 - protein pptr-1, nhr-14 - protein nhr-14, nhr-3 - protein nhr-3, spsb-1 - protein spsb-1, pde-4 - protein pde-4, tig-3 - protein tig-3, srp-7 - protein srp-7, crh-1 - protein crh-1, nhr-23 - protein nhr-23, arrd-22 - protein arrd-22, nhr-85 - protein nhr-85, dmsr-7 - protein dmsr-7, shc-1 - protein shc-1, ZK622.1 - protein zk622.1, ikb-1 - protein ikb-1, nhr-88 -…
GO:0045927	positive regulation of growth	1.29e-09	1.42e-07	3.21	7788	283	326	38	[nkb-1 - protein nkb-1, ire-1 - protein ire-1, blmp-1 - protein blmp-1, dbl-1 - protein dbl-1, peb-1 - protein peb-1, pqn-47 - protein pqn-47, sma-5 - protein sma-5, skn-1 - protein skn-1, nhr-23 - protein nhr-23, sma-2 - protein sma-2, alg-1 - protein alg-1, let-2 - protein let-2, vhp-1 - protein vhp-1, unc-43 - protein unc-43, kin-20 - protein kin-20, CELE_T26A8.4 - protein t26a8.4, CELE_Y111B2…
GO:0044703	multi-organism reproductive process	1.38e-09	1.47e-07	3.68	7788	329	206	32	[lin-42 - protein lin-42, mig-15 - protein mig-15, ulp-4 - protein ulp-4, pqn-47 - protein pqn-47, daf-12 - protein daf-12, gsa-1 - protein gsa-1, pdfr-1 - protein pdfr-1, egl-27 - protein egl-27, lev-11 - protein lev-11, tra-1 - protein tra-1, unc-62 - protein unc-62, lin-59 - protein lin-59, kin-1 - protein kin-1, egl-19 - protein egl-19, hbl-1 - protein hbl-1, etr-1 - protein etr-1, unc-54 - p…
GO:0033057	multicellular organismal reproductive behavior	1.41e-09	1.47e-07	3.76	7788	312	206	31	[lin-42 - protein lin-42, mig-15 - protein mig-15, ulp-4 - protein ulp-4, pqn-47 - protein pqn-47, daf-12 - protein daf-12, gsa-1 - protein gsa-1, pdfr-1 - protein pdfr-1, egl-27 - protein egl-27, lev-11 - protein lev-11, unc-62 - protein unc-62, lin-59 - protein lin-59, kin-1 - protein kin-1, egl-19 - protein egl-19, hbl-1 - protein hbl-1, etr-1 - protein etr-1, unc-54 - protein unc-54, atx-2 - …
GO:0032501	multicellular organismal process	2.12e-09	2.16e-07	1.71	7788	2377	201	105	[dlg-1 - protein dlg-1, nhr-14 - protein nhr-14, pde-4 - protein pde-4, R12B2.6 - protein r12b2.6, klc-2 - protein klc-2, peb-1 - protein peb-1, crh-1 - protein crh-1, lpin-1 - protein lpin-1, sma-5 - protein sma-5, jph-1 - protein jph-1, vab-10 - protein vab-10, eps-8 - protein eps-8, lin-59 - protein lin-59, egl-19 - protein egl-19, hbl-1 - protein hbl-1, nhr-40 - protein nhr-40, din-1 - protei…
GO:0019098	reproductive behavior	2.17e-09	2.16e-07	3.71	7788	316	206	31	[lin-42 - protein lin-42, mig-15 - protein mig-15, ulp-4 - protein ulp-4, pqn-47 - protein pqn-47, daf-12 - protein daf-12, gsa-1 - protein gsa-1, pdfr-1 - protein pdfr-1, egl-27 - protein egl-27, lev-11 - protein lev-11, unc-62 - protein unc-62, lin-59 - protein lin-59, kin-1 - protein kin-1, egl-19 - protein egl-19, hbl-1 - protein hbl-1, etr-1 - protein etr-1, unc-54 - protein unc-54, atx-2 - …
GO:0044705	multi-organism reproductive behavior	2.17e-09	2.11e-07	3.71	7788	316	206	31	[lin-42 - protein lin-42, mig-15 - protein mig-15, ulp-4 - protein ulp-4, pqn-47 - protein pqn-47, daf-12 - protein daf-12, gsa-1 - protein gsa-1, pdfr-1 - protein pdfr-1, egl-27 - protein egl-27, lev-11 - protein lev-11, unc-62 - protein unc-62, lin-59 - protein lin-59, kin-1 - protein kin-1, egl-19 - protein egl-19, hbl-1 - protein hbl-1, etr-1 - protein etr-1, unc-54 - protein unc-54, atx-2 - …
GO:0051705	multi-organism behavior	2.5e-09	2.38e-07	3.7	7788	317	206	31	[lin-42 - protein lin-42, mig-15 - protein mig-15, ulp-4 - protein ulp-4, pqn-47 - protein pqn-47, daf-12 - protein daf-12, gsa-1 - protein gsa-1, pdfr-1 - protein pdfr-1, egl-27 - protein egl-27, lev-11 - protein lev-11, unc-62 - protein unc-62, lin-59 - protein lin-59, kin-1 - protein kin-1, egl-19 - protein egl-19, hbl-1 - protein hbl-1, etr-1 - protein etr-1, unc-54 - protein unc-54, atx-2 - …
GO:0044706	multi-multicellular organism process	3.08e-09	2.86e-07	3.66	7788	320	206	31	[lin-42 - protein lin-42, mig-15 - protein mig-15, ulp-4 - protein ulp-4, pqn-47 - protein pqn-47, daf-12 - protein daf-12, gsa-1 - protein gsa-1, pdfr-1 - protein pdfr-1, egl-27 - protein egl-27, lev-11 - protein lev-11, unc-62 - protein unc-62, lin-59 - protein lin-59, kin-1 - protein kin-1, egl-19 - protein egl-19, hbl-1 - protein hbl-1, etr-1 - protein etr-1, unc-54 - protein unc-54, atx-2 - …
GO:0051704	multi-organism process	4.53e-09	4.12e-07	3.27	7788	405	206	35	[lgg-2 - protein lgg-2, lin-42 - protein lin-42, mig-15 - protein mig-15, ulp-4 - protein ulp-4, pqn-47 - protein pqn-47, daf-12 - protein daf-12, gsa-1 - protein gsa-1, pdfr-1 - protein pdfr-1, egl-27 - protein egl-27, lev-11 - protein lev-11, tra-1 - protein tra-1, daf-16 - protein daf-16, unc-62 - protein unc-62, lin-59 - protein lin-59, kin-1 - protein kin-1, hbl-1 - protein hbl-1, egl-19 - p…
GO:0060255	regulation of macromolecule metabolic process	4.61e-09	4.11e-07	2.22	7788	990	227	64	[ife-3 - protein ife-3, lin-42 - protein lin-42, nhr-14 - protein nhr-14, mig-15 - protein mig-15, nhr-3 - protein nhr-3, hlh-11 - protein hlh-11, fkh-9 - protein fkh-9, T28C12.6 - protein t28c12.6, blmp-1 - protein blmp-1, crh-1 - protein crh-1, lpin-1 - protein lpin-1, daf-12 - protein daf-12, egl-27 - protein egl-27, sma-2 - protein sma-2, atf-7 - protein atf-7, crtc-1 - protein crtc-1, lin-59…
GO:1901564	organonitrogen compound metabolic process	7.94e-09	6.92e-07	1.26	7788	501	3900	317	[gspd-1 - protein gspd-1, W01D2.1 - protein w01d2.1, rpl-19 - protein rpl-19, cdd-1 - protein cdd-1, atp-3 - protein atp-3, dars-1 - protein dars-1, ears-2 - protein ears-2, asns-2 - protein asns-2, CELE_Y18D10A.3 - protein y18d10a.3, pam-1 - protein pam-1, clk-1 - protein clk-1, vha-10 - protein vha-10, glna-1 - protein glna-1, R07H5.8 - protein r07h5.8, F55G1.9 - protein f55g1.9, gars-1 - prote…
GO:0048519	negative regulation of biological process	9.5e-09	8.12e-07	2.58	7788	623	233	48	[lin-42 - protein lin-42, dgk-1 - protein dgk-1, flh-2 - protein flh-2, egl-10 - protein egl-10, R13A5.7 - protein r13a5.7, pde-4 - protein pde-4, T28C12.6 - protein t28c12.6, blmp-1 - protein blmp-1, unc-94 - protein unc-94, daf-5 - protein daf-5, pde-6 - protein pde-6, gsa-1 - protein gsa-1, vab-10 - protein vab-10, eps-8 - protein eps-8, sma-2 - protein sma-2, lev-11 - protein lev-11, mai-1 - …
GO:0048583	regulation of response to stimulus	1.24e-08	1.04e-06	2.15	7788	288	818	65	[Y32H12A.4 - protein y32h12a.4, pptr-1 - protein pptr-1, mig-15 - protein mig-15, egl-30 - protein egl-30, egl-10 - protein egl-10, nsy-4 - protein nsy-4, pde-4 - protein pde-4, tig-3 - protein tig-3, dbl-1 - protein dbl-1, dyc-1 - protein dyc-1, rab-3 - protein rab-3, daf-12 - protein daf-12, atf-7 - protein atf-7, unc-43 - protein unc-43, sur-7 - protein sur-7, egl-19 - protein egl-19, unc-10 -…
GO:0010468	regulation of gene expression	1.49e-08	1.22e-06	2.32	7788	829	227	56	[ife-3 - protein ife-3, nhr-14 - protein nhr-14, lin-42 - protein lin-42, nhr-3 - protein nhr-3, fkh-9 - protein fkh-9, hlh-11 - protein hlh-11, blmp-1 - protein blmp-1, crh-1 - protein crh-1, lpin-1 - protein lpin-1, daf-12 - protein daf-12, egl-27 - protein egl-27, sma-2 - protein sma-2, atf-7 - protein atf-7, crtc-1 - protein crtc-1, unc-62 - protein unc-62, lin-59 - protein lin-59, nhr-88 - p…
GO:0048522	positive regulation of cellular process	1.88e-08	1.52e-06	3.68	7788	355	167	28	[mig-15 - protein mig-15, lpin-1 - protein lpin-1, crh-1 - protein crh-1, daf-12 - protein daf-12, gsa-1 - protein gsa-1, jph-1 - protein jph-1, pdfr-1 - protein pdfr-1, ckk-1 - protein ckk-1, unc-60 - protein unc-60, crtc-1 - protein crtc-1, tra-1 - protein tra-1, daf-16 - protein daf-16, unc-62 - protein unc-62, lin-59 - protein lin-59, jun-1 - protein jun-1, unc-57 - protein unc-57, kin-1 - pr…
GO:0000122	negative regulation of transcription from RNA polymerase II promoter	2.32e-08	1.83e-06	6.64	7788	56	335	16	[jun-1 - protein jun-1, lin-42 - protein lin-42, hbl-1 - protein hbl-1, nhr-69 - protein nhr-69, mef-2 - protein mef-2, wdr-23 - protein wdr-23, hda-4 - protein hda-4, blmp-1 - protein blmp-1, lin-14 - protein lin-14, daf-5 - protein daf-5, let-418 - protein let-418, sma-9 - protein sma-9, atf-7 - protein atf-7, tra-1 - protein tra-1, CELE_Y39E4B.6 - protein y39e4b.6, daf-16 - protein daf-16]
GO:0006897	endocytosis	2.93e-08	2.27e-06	1.23	7788	556	4078	358	[itr-1 - protein itr-1, F30A10.9 - protein f30a10.9, CELE_C30H7.2 - protein c30h7.2, F33D4.5 - protein f33d4.5, eea-1 - protein eea-1, gut-2 - protein gut-2, skr-1 - protein skr-1, tbg-1 - protein tbg-1, ehs-1 - protein ehs-1, C07A9.2 - protein c07a9.2, paa-1 - protein paa-1, snap-1 - protein snap-1, letm-1 - protein letm-1, dars-1 - protein dars-1, tom-1 - protein tom-1, ostd-1 - protein ostd-1,…
GO:0018991	oviposition	4.72e-08	3.6e-06	2.99	7788	282	323	35	[mab-31 - protein mab-31, lin-42 - protein lin-42, egl-30 - protein egl-30, mig-15 - protein mig-15, unc-15 - protein unc-15, ulp-4 - protein ulp-4, pqn-47 - protein pqn-47, gsa-1 - protein gsa-1, nhr-23 - protein nhr-23, egl-27 - protein egl-27, C26B9.3 - protein c26b9.3, unc-36 - protein unc-36, unc-62 - protein unc-62, lin-59 - protein lin-59, kin-1 - protein kin-1, egl-19 - protein egl-19, hb…
GO:1902679	negative regulation of RNA biosynthetic process	6.14e-08	4.6e-06	5.95	7788	77	289	17	[jun-1 - protein jun-1, lin-42 - protein lin-42, hbl-1 - protein hbl-1, flh-2 - protein flh-2, nhr-69 - protein nhr-69, mef-2 - protein mef-2, wdr-23 - protein wdr-23, blmp-1 - protein blmp-1, lin-14 - protein lin-14, daf-5 - protein daf-5, let-418 - protein let-418, mab-10 - protein mab-10, sma-9 - protein sma-9, atf-7 - protein atf-7, tra-1 - protein tra-1, CELE_Y39E4B.6 - protein y39e4b.6, daf…
GO:0045892	negative regulation of transcription, DNA-templated	6.14e-08	4.52e-06	5.95	7788	77	289	17	[jun-1 - protein jun-1, lin-42 - protein lin-42, hbl-1 - protein hbl-1, flh-2 - protein flh-2, nhr-69 - protein nhr-69, mef-2 - protein mef-2, wdr-23 - protein wdr-23, blmp-1 - protein blmp-1, lin-14 - protein lin-14, daf-5 - protein daf-5, let-418 - protein let-418, mab-10 - protein mab-10, sma-9 - protein sma-9, atf-7 - protein atf-7, tra-1 - protein tra-1, CELE_Y39E4B.6 - protein y39e4b.6, daf…
GO:1903507	negative regulation of nucleic acid-templated transcription	6.14e-08	4.45e-06	5.95	7788	77	289	17	[jun-1 - protein jun-1, lin-42 - protein lin-42, hbl-1 - protein hbl-1, flh-2 - protein flh-2, nhr-69 - protein nhr-69, mef-2 - protein mef-2, wdr-23 - protein wdr-23, blmp-1 - protein blmp-1, lin-14 - protein lin-14, daf-5 - protein daf-5, let-418 - protein let-418, mab-10 - protein mab-10, sma-9 - protein sma-9, atf-7 - protein atf-7, tra-1 - protein tra-1, CELE_Y39E4B.6 - protein y39e4b.6, daf…
GO:0006165	nucleoside diphosphate phosphorylation	6.27e-08	4.47e-06	2.71	7788	22	2741	21	[gpd-3 - protein gpd-3, R05G6.5 - protein r05g6.5, enol-1 - protein enol-1, pyk-1 - protein pyk-1, pyk-2 - protein pyk-2, pgk-1 - protein pgk-1, tpi-1 - protein tpi-1, F54C1.6 - protein f54c1.6, aldo-1 - protein aldo-1, Y77E11A.1 - protein y77e11a.1, aldo-2 - protein aldo-2, H25P06.1 - protein h25p06.1, gpi-1 - protein gpi-1, ogdh-1 - protein ogdh-1, ndk-1 - protein ndk-1, F38B2.4 - protein f38b2…
GO:0051253	negative regulation of RNA metabolic process	9.28e-08	6.5e-06	5.8	7788	79	289	17	[jun-1 - protein jun-1, lin-42 - protein lin-42, hbl-1 - protein hbl-1, flh-2 - protein flh-2, nhr-69 - protein nhr-69, mef-2 - protein mef-2, wdr-23 - protein wdr-23, blmp-1 - protein blmp-1, lin-14 - protein lin-14, daf-5 - protein daf-5, let-418 - protein let-418, mab-10 - protein mab-10, sma-9 - protein sma-9, atf-7 - protein atf-7, tra-1 - protein tra-1, CELE_Y39E4B.6 - protein y39e4b.6, daf…
GO:0044281	small molecule metabolic process	1.16e-07	8.02e-06	1.22	7788	499	4301	336	[C48B4.1 - protein c48b4.1, gspd-1 - protein gspd-1, cyp-34A1 - protein cyp-34a1, coq-1 - protein coq-1, sdha-1 - protein sdha-1, cdd-1 - protein cdd-1, ugt-60 - protein ugt-60, cyp-35A2 - protein cyp-35a2, cyp-33D1 - protein cyp-33d1, atp-3 - protein atp-3, R53.4 - protein r53.4, dars-1 - protein dars-1, lpin-1 - protein lpin-1, cyp-33C5 - protein cyp-33c5, ugt-32 - protein ugt-32, C05C10.3 - pr…
GO:1901576	organic substance biosynthetic process	1.37e-07	9.32e-06	1.16	7788	1023	3923	600	[nhr-14 - protein nhr-14, pri-1 - protein pri-1, W01D2.1 - protein w01d2.1, hlh-11 - protein hlh-11, nhr-86 - protein nhr-86, ugt-60 - protein ugt-60, nhr-59 - protein nhr-59, dars-1 - protein dars-1, lpin-1 - protein lpin-1, ugt-32 - protein ugt-32, asns-2 - protein asns-2, nhr-56 - protein nhr-56, F55G1.9 - protein f55g1.9, taf-4 - protein taf-4, rgr-1 - protein rgr-1, dao-3 - protein dao-3, rp…
GO:0046939	nucleotide phosphorylation	1.54e-07	1.03e-05	2.46	7788	30	2741	26	[gpd-3 - protein gpd-3, R05G6.5 - protein r05g6.5, enol-1 - protein enol-1, dlg-1 - protein dlg-1, pyk-2 - protein pyk-2, pgk-1 - protein pgk-1, guk-1 - protein guk-1, F54C1.6 - protein f54c1.6, aldo-1 - protein aldo-1, Y77E11A.1 - protein y77e11a.1, ndk-1 - protein ndk-1, F38B2.4 - protein f38b2.4, F40F8.1 - protein f40f8.1, Y48G8AL.15 - protein y48g8al.15, dlat-1 - protein dlat-1, CELE_ZK673.2 …
GO:0016310	phosphorylation	1.62e-07	1.07e-05	2.97	7788	401	216	33	[dlg-1 - protein dlg-1, R05G6.5 - protein r05g6.5, dgk-1 - protein dgk-1, mig-15 - protein mig-15, F47F2.1 - protein f47f2.1, mnk-1 - protein mnk-1, ire-1 - protein ire-1, mvk-1 - protein mvk-1, sma-5 - protein sma-5, pkg-2 - protein pkg-2, ckk-1 - protein ckk-1, pkc-1 - protein pkc-1, Y43C5B.2 - protein y43c5b.2, lit-1 - protein lit-1, unc-43 - protein unc-43, kin-20 - protein kin-20, unc-82 - p…
GO:0006351	transcription, DNA-templated	1.72e-07	1.11e-05	7.52	7788	444	28	12	[lin-14 - protein lin-14, jun-1 - protein jun-1, daf-12 - protein daf-12, hbl-1 - protein hbl-1, lin-42 - protein lin-42, nhr-14 - protein nhr-14, nhr-40 - protein nhr-40, fkh-7 - protein fkh-7, hlh-30 - protein hlh-30, fkh-9 - protein fkh-9, tag-97 - protein tag-97, daf-16 - protein daf-16]
GO:0040013	negative regulation of locomotion	1.74e-07	1.11e-05	8.64	7788	24	413	11	[gsa-1 - protein gsa-1, dgk-1 - protein dgk-1, gpb-1 - protein gpb-1, egl-30 - protein egl-30, R13A5.7 - protein r13a5.7, acy-1 - protein acy-1, kin-2 - protein kin-2, eat-16 - protein eat-16, rsbp-1 - protein rsbp-1, pde-4 - protein pde-4, blmp-1 - protein blmp-1]
GO:0097659	nucleic acid-templated transcription	1.93e-07	1.22e-05	7.45	7788	448	28	12	[lin-14 - protein lin-14, jun-1 - protein jun-1, daf-12 - protein daf-12, hbl-1 - protein hbl-1, lin-42 - protein lin-42, nhr-14 - protein nhr-14, nhr-40 - protein nhr-40, fkh-7 - protein fkh-7, hlh-30 - protein hlh-30, fkh-9 - protein fkh-9, tag-97 - protein tag-97, daf-16 - protein daf-16]
GO:0045934	negative regulation of nucleobase-containing compound metabolic process	1.97e-07	1.22e-05	5.22	7788	93	289	18	[jun-1 - protein jun-1, lin-42 - protein lin-42, hbl-1 - protein hbl-1, flh-2 - protein flh-2, nhr-69 - protein nhr-69, mef-2 - protein mef-2, wdr-23 - protein wdr-23, blmp-1 - protein blmp-1, lin-14 - protein lin-14, daf-5 - protein daf-5, let-418 - protein let-418, mab-10 - protein mab-10, sma-9 - protein sma-9, mai-1 - protein mai-1, atf-7 - protein atf-7, tra-1 - protein tra-1, CELE_Y39E4B.6 …
GO:0044249	cellular biosynthetic process	1.97e-07	1.21e-05	1.17	7788	965	3923	568	[C48B4.1 - protein c48b4.1, nhr-14 - protein nhr-14, pri-1 - protein pri-1, W01D2.1 - protein w01d2.1, hlh-11 - protein hlh-11, nhr-86 - protein nhr-86, dars-1 - protein dars-1, nhr-59 - protein nhr-59, lpin-1 - protein lpin-1, asns-2 - protein asns-2, nhr-56 - protein nhr-56, F55G1.9 - protein f55g1.9, taf-4 - protein taf-4, rgr-1 - protein rgr-1, dao-3 - protein dao-3, rps-19 - protein rps-19, …
GO:1901566	organonitrogen compound biosynthetic process	2.02e-07	1.22e-05	1.26	7788	349	4288	242	[eif-3.B - protein eif-3.b, W01D2.1 - protein w01d2.1, rpl-19 - protein rpl-19, R53.4 - protein r53.4, atp-3 - protein atp-3, dars-1 - protein dars-1, ears-2 - protein ears-2, asns-2 - protein asns-2, vha-10 - protein vha-10, R07H5.8 - protein r07h5.8, F55G1.9 - protein f55g1.9, gars-1 - protein gars-1, mrps-7 - protein mrps-7, dao-3 - protein dao-3, rps-11 - protein rps-11, rps-26 - protein rps-…
GO:0009058	biosynthetic process	2.23e-07	1.32e-05	1.16	7788	1053	3923	615	[C48B4.1 - protein c48b4.1, nhr-14 - protein nhr-14, pri-1 - protein pri-1, W01D2.1 - protein w01d2.1, hlh-11 - protein hlh-11, nhr-86 - protein nhr-86, ugt-60 - protein ugt-60, nhr-59 - protein nhr-59, dars-1 - protein dars-1, lpin-1 - protein lpin-1, ugt-32 - protein ugt-32, asns-2 - protein asns-2, nhr-56 - protein nhr-56, F55G1.9 - protein f55g1.9, taf-4 - protein taf-4, rgr-1 - protein rgr-1…
GO:0032774	RNA biosynthetic process	2.91e-07	1.7e-05	7.21	7788	463	28	12	[lin-14 - protein lin-14, jun-1 - protein jun-1, daf-12 - protein daf-12, hbl-1 - protein hbl-1, lin-42 - protein lin-42, nhr-14 - protein nhr-14, nhr-40 - protein nhr-40, fkh-7 - protein fkh-7, hlh-30 - protein hlh-30, fkh-9 - protein fkh-9, tag-97 - protein tag-97, daf-16 - protein daf-16]
GO:0030029	actin filament-based process	3.08e-07	1.78e-05	2.73	7788	156	621	34	[unc-23 - protein unc-23, rmd-2 - protein rmd-2, rga-5 - protein rga-5, F47F2.1 - protein f47f2.1, ric-7 - protein ric-7, wip-1 - protein wip-1, unc-15 - protein unc-15, chc-1 - protein chc-1, unc-87 - protein unc-87, unc-94 - protein unc-94, dyc-1 - protein dyc-1, jnk-1 - protein jnk-1, vab-10 - protein vab-10, tmd-2 - protein tmd-2, unc-60 - protein unc-60, F32B5.7 - protein f32b5.7, sax-7 - pr…
GO:1901657	glycosyl compound metabolic process	3.39e-07	1.93e-05	1.55	7788	96	3983	76	[CELE_T04A8.5 - protein t04a8.5, enol-1 - protein enol-1, asg-2 - protein asg-2, F19B6.1 - protein f19b6.1, asb-1 - protein asb-1, cdd-1 - protein cdd-1, pnk-1 - protein pnk-1, upp-1 - protein upp-1, R53.4 - protein r53.4, atp-3 - protein atp-3, vha-12 - protein vha-12, Y82E9BR.3 - protein y82e9br.3, clk-1 - protein clk-1, vha-10 - protein vha-10, ndk-1 - protein ndk-1, B0228.7 - protein b0228.7,…
GO:0065008	regulation of biological quality	3.84e-07	2.16e-05	1.63	7788	712	778	116	[CELE_C30H7.2 - protein c30h7.2, ogt-1 - protein ogt-1, ttr-48 - protein ttr-48, klf-3 - protein klf-3, CELE_W03A5.4 - protein w03a5.4, C18H2.1 - protein c18h2.1, lbp-9 - protein lbp-9, C07A9.2 - protein c07a9.2, peb-1 - protein peb-1, lpin-1 - protein lpin-1, C18H2.2 - protein c18h2.2, eps-8 - protein eps-8, prk-2 - protein prk-2, K05F1.6 - protein k05f1.6, tmd-2 - protein tmd-2, C23H3.2 - prote…
GO:0006366	transcription from RNA polymerase II promoter	3.97e-07	2.2e-05	23.18	7788	84	28	7	[jun-1 - protein jun-1, hbl-1 - protein hbl-1, hlh-30 - protein hlh-30, fkh-7 - protein fkh-7, fkh-9 - protein fkh-9, tag-97 - protein tag-97, daf-16 - protein daf-16]
GO:0009891	positive regulation of biosynthetic process	4.48e-07	2.46e-05	4.78	7788	142	218	19	[jun-1 - protein jun-1, unc-62 - protein unc-62, lin-59 - protein lin-59, hlh-30 - protein hlh-30, mef-2 - protein mef-2, cmk-1 - protein cmk-1, ire-1 - protein ire-1, rskn-2 - protein rskn-2, crh-1 - protein crh-1, lpin-1 - protein lpin-1, daf-12 - protein daf-12, pdfr-1 - protein pdfr-1, sma-9 - protein sma-9, ckk-1 - protein ckk-1, tra-1 - protein tra-1, atf-7 - protein atf-7, crtc-1 - protein…
GO:0031328	positive regulation of cellular biosynthetic process	4.48e-07	2.43e-05	4.78	7788	142	218	19	[jun-1 - protein jun-1, unc-62 - protein unc-62, lin-59 - protein lin-59, hlh-30 - protein hlh-30, mef-2 - protein mef-2, cmk-1 - protein cmk-1, ire-1 - protein ire-1, rskn-2 - protein rskn-2, lpin-1 - protein lpin-1, crh-1 - protein crh-1, daf-12 - protein daf-12, pdfr-1 - protein pdfr-1, sma-9 - protein sma-9, ckk-1 - protein ckk-1, tra-1 - protein tra-1, atf-7 - protein atf-7, crtc-1 - protein…
GO:0051173	positive regulation of nitrogen compound metabolic process	4.97e-07	2.65e-05	4.75	7788	143	218	19	[jun-1 - protein jun-1, unc-62 - protein unc-62, lin-59 - protein lin-59, hlh-30 - protein hlh-30, mef-2 - protein mef-2, cmk-1 - protein cmk-1, ire-1 - protein ire-1, rskn-2 - protein rskn-2, crh-1 - protein crh-1, lpin-1 - protein lpin-1, daf-12 - protein daf-12, pdfr-1 - protein pdfr-1, sma-9 - protein sma-9, ckk-1 - protein ckk-1, tra-1 - protein tra-1, atf-7 - protein atf-7, crtc-1 - protein…
GO:0042278	purine nucleoside metabolic process	5.31e-07	2.8e-05	1.6	7788	77	3983	63	[enol-1 - protein enol-1, asg-2 - protein asg-2, asb-1 - protein asb-1, pnk-1 - protein pnk-1, R53.4 - protein r53.4, atp-3 - protein atp-3, vha-12 - protein vha-12, Y82E9BR.3 - protein y82e9br.3, clk-1 - protein clk-1, ndk-1 - protein ndk-1, B0228.7 - protein b0228.7, vha-10 - protein vha-10, R07H5.8 - protein r07h5.8, Y48G8AL.15 - protein y48g8al.15, dlat-1 - protein dlat-1, mig-23 - protein mi…
GO:0046128	purine ribonucleoside metabolic process	5.31e-07	2.77e-05	1.6	7788	77	3983	63	[enol-1 - protein enol-1, asg-2 - protein asg-2, asb-1 - protein asb-1, pnk-1 - protein pnk-1, R53.4 - protein r53.4, atp-3 - protein atp-3, vha-12 - protein vha-12, Y82E9BR.3 - protein y82e9br.3, clk-1 - protein clk-1, B0228.7 - protein b0228.7, vha-10 - protein vha-10, ndk-1 - protein ndk-1, R07H5.8 - protein r07h5.8, dlat-1 - protein dlat-1, Y48G8AL.15 - protein y48g8al.15, mig-23 - protein mi…
GO:0009116	nucleoside metabolic process	5.39e-07	2.78e-05	1.55	7788	92	3983	73	[CELE_T04A8.5 - protein t04a8.5, enol-1 - protein enol-1, asg-2 - protein asg-2, F19B6.1 - protein f19b6.1, asb-1 - protein asb-1, cdd-1 - protein cdd-1, pnk-1 - protein pnk-1, upp-1 - protein upp-1, R53.4 - protein r53.4, atp-3 - protein atp-3, vha-12 - protein vha-12, Y82E9BR.3 - protein y82e9br.3, clk-1 - protein clk-1, B0228.7 - protein b0228.7, ndk-1 - protein ndk-1, vha-10 - protein vha-10,…
GO:0009890	negative regulation of biosynthetic process	5.55e-07	2.82e-05	4.9	7788	99	289	18	[jun-1 - protein jun-1, hbl-1 - protein hbl-1, lin-42 - protein lin-42, nhr-69 - protein nhr-69, flh-2 - protein flh-2, mef-2 - protein mef-2, wdr-23 - protein wdr-23, blmp-1 - protein blmp-1, lin-14 - protein lin-14, daf-5 - protein daf-5, let-418 - protein let-418, mab-10 - protein mab-10, kin-29 - protein kin-29, sma-9 - protein sma-9, tra-1 - protein tra-1, atf-7 - protein atf-7, CELE_Y39E4B.…
GO:0031327	negative regulation of cellular biosynthetic process	5.55e-07	2.79e-05	4.9	7788	99	289	18	[jun-1 - protein jun-1, hbl-1 - protein hbl-1, lin-42 - protein lin-42, nhr-69 - protein nhr-69, flh-2 - protein flh-2, mef-2 - protein mef-2, wdr-23 - protein wdr-23, blmp-1 - protein blmp-1, lin-14 - protein lin-14, daf-5 - protein daf-5, let-418 - protein let-418, mab-10 - protein mab-10, kin-29 - protein kin-29, sma-9 - protein sma-9, tra-1 - protein tra-1, atf-7 - protein atf-7, CELE_Y39E4B.…
GO:0009119	ribonucleoside metabolic process	5.62e-07	2.79e-05	1.56	7788	89	3983	71	[enol-1 - protein enol-1, asg-2 - protein asg-2, F19B6.1 - protein f19b6.1, asb-1 - protein asb-1, cdd-1 - protein cdd-1, pnk-1 - protein pnk-1, upp-1 - protein upp-1, R53.4 - protein r53.4, atp-3 - protein atp-3, vha-12 - protein vha-12, Y82E9BR.3 - protein y82e9br.3, clk-1 - protein clk-1, B0228.7 - protein b0228.7, ndk-1 - protein ndk-1, vha-10 - protein vha-10, F40F8.1 - protein f40f8.1, R07H…
GO:0009205	purine ribonucleoside triphosphate metabolic process	6.52e-07	3.2e-05	2.08	7788	52	2741	38	[gpd-3 - protein gpd-3, enol-1 - protein enol-1, R05G6.5 - protein r05g6.5, pgk-1 - protein pgk-1, pyk-2 - protein pyk-2, atp-4 - protein atp-4, aldo-1 - protein aldo-1, Y77E11A.1 - protein y77e11a.1, F54C1.6 - protein f54c1.6, atp-3 - protein atp-3, asg-1 - protein asg-1, vha-12 - protein vha-12, Y82E9BR.3 - protein y82e9br.3, clk-1 - protein clk-1, ndk-1 - protein ndk-1, F38B2.4 - protein f38b2…
GO:0009144	purine nucleoside triphosphate metabolic process	6.52e-07	3.17e-05	2.08	7788	52	2741	38	[gpd-3 - protein gpd-3, enol-1 - protein enol-1, R05G6.5 - protein r05g6.5, pgk-1 - protein pgk-1, pyk-2 - protein pyk-2, atp-4 - protein atp-4, aldo-1 - protein aldo-1, Y77E11A.1 - protein y77e11a.1, F54C1.6 - protein f54c1.6, atp-3 - protein atp-3, asg-1 - protein asg-1, vha-12 - protein vha-12, Y82E9BR.3 - protein y82e9br.3, clk-1 - protein clk-1, ndk-1 - protein ndk-1, F38B2.4 - protein f38b2…
GO:0009653	anatomical structure morphogenesis	6.92e-07	3.33e-05	1.91	7788	683	424	71	[mab-31 - protein mab-31, lin-42 - protein lin-42, mig-15 - protein mig-15, egl-10 - protein egl-10, fkh-9 - protein fkh-9, dpy-4 - protein dpy-4, dpy-10 - protein dpy-10, unc-15 - protein unc-15, gei-13 - protein gei-13, dbl-1 - protein dbl-1, blmp-1 - protein blmp-1, peb-1 - protein peb-1, F27C1.2 - protein f27c1.2, nhr-23 - protein nhr-23, vab-10 - protein vab-10, eps-8 - protein eps-8, egl-27…
GO:0044283	small molecule biosynthetic process	7.24e-07	3.44e-05	1.45	7788	117	4284	93	[T01H8.2 - protein t01h8.2, metr-1 - protein metr-1, alh-6 - protein alh-6, C42C1.11 - protein c42c1.11, coq-1 - protein coq-1, ttx-7 - protein ttx-7, hpo-8 - protein hpo-8, F37C12.3 - protein f37c12.3, unc-25 - protein unc-25, Y53G8AL.2 - protein y53g8al.2, elo-1 - protein elo-1, asns-2 - protein asns-2, clk-1 - protein clk-1, B0228.7 - protein b0228.7, M153.1 - protein m153.1, F55G1.9 - protein…
GO:0043604	amide biosynthetic process	7.49e-07	3.52e-05	1.39	7788	180	3824	123	[rpl-9 - protein rpl-9, W01D2.1 - protein w01d2.1, rpl-19 - protein rpl-19, qars-1 - protein qars-1, rps-14 - protein rps-14, eif-1.A - protein eif-1.a, rpl-36 - protein rpl-36, T23F2.2 - protein t23f2.2, rps-21 - protein rps-21, dars-1 - protein dars-1, rps-18 - protein rps-18, ears-2 - protein ears-2, rpl-6 - protein rpl-6, asns-2 - protein asns-2, mrpl-17 - protein mrpl-17, mrpl-9 - protein mr…
GO:0007010	cytoskeleton organization	7.74e-07	3.6e-05	2.21	7788	278	621	49	[F47F2.1 - protein f47f2.1, anc-1 - protein anc-1, unc-15 - protein unc-15, klc-2 - protein klc-2, dyc-1 - protein dyc-1, eps-8 - protein eps-8, vab-10 - protein vab-10, fln-1 - protein fln-1, tmd-2 - protein tmd-2, Y48G8AL.15 - protein y48g8al.15, unc-82 - protein unc-82, C02F5.7 - protein c02f5.7, nhr-40 - protein nhr-40, F42C5.9 - protein f42c5.9, crml-1 - protein crml-1, unc-115 - protein unc…
GO:0035556	intracellular signal transduction	8.33e-07	3.83e-05	3.86	7788	228	186	21	[dgk-1 - protein dgk-1, mig-15 - protein mig-15, unc-54 - protein unc-54, egl-10 - protein egl-10, nipi-3 - protein nipi-3, ctn-1 - protein ctn-1, pac-1 - protein pac-1, spsb-1 - protein spsb-1, K08F8.1 - protein k08f8.1, mnk-1 - protein mnk-1, rskn-2 - protein rskn-2, crh-1 - protein crh-1, kin-29 - protein kin-29, ckk-1 - protein ckk-1, gcy-28 - protein gcy-28, pkc-1 - protein pkc-1, unc-73 - p…
GO:0010557	positive regulation of macromolecule biosynthetic process	8.61e-07	3.92e-05	4.83	7788	133	218	18	[jun-1 - protein jun-1, unc-62 - protein unc-62, lin-59 - protein lin-59, hlh-30 - protein hlh-30, mef-2 - protein mef-2, cmk-1 - protein cmk-1, ire-1 - protein ire-1, rskn-2 - protein rskn-2, lpin-1 - protein lpin-1, crh-1 - protein crh-1, daf-12 - protein daf-12, sma-9 - protein sma-9, ckk-1 - protein ckk-1, tra-1 - protein tra-1, crtc-1 - protein crtc-1, atf-7 - protein atf-7, let-526 - protei…
GO:0010558	negative regulation of macromolecule biosynthetic process	8.76e-07	3.94e-05	5.03	7788	91	289	17	[jun-1 - protein jun-1, lin-42 - protein lin-42, hbl-1 - protein hbl-1, flh-2 - protein flh-2, nhr-69 - protein nhr-69, mef-2 - protein mef-2, wdr-23 - protein wdr-23, blmp-1 - protein blmp-1, lin-14 - protein lin-14, daf-5 - protein daf-5, let-418 - protein let-418, mab-10 - protein mab-10, sma-9 - protein sma-9, atf-7 - protein atf-7, tra-1 - protein tra-1, CELE_Y39E4B.6 - protein y39e4b.6, daf…
GO:2000113	negative regulation of cellular macromolecule biosynthetic process	8.76e-07	3.9e-05	5.03	7788	91	289	17	[jun-1 - protein jun-1, lin-42 - protein lin-42, hbl-1 - protein hbl-1, nhr-69 - protein nhr-69, flh-2 - protein flh-2, mef-2 - protein mef-2, wdr-23 - protein wdr-23, blmp-1 - protein blmp-1, lin-14 - protein lin-14, daf-5 - protein daf-5, let-418 - protein let-418, mab-10 - protein mab-10, sma-9 - protein sma-9, atf-7 - protein atf-7, tra-1 - protein tra-1, CELE_Y39E4B.6 - protein y39e4b.6, daf…
GO:0006898	receptor-mediated endocytosis	8.93e-07	3.94e-05	1.21	7788	516	4107	330	[itr-1 - protein itr-1, F30A10.9 - protein f30a10.9, CELE_C30H7.2 - protein c30h7.2, F33D4.5 - protein f33d4.5, skr-1 - protein skr-1, gut-2 - protein gut-2, tbg-1 - protein tbg-1, C07A9.2 - protein c07a9.2, paa-1 - protein paa-1, snap-1 - protein snap-1, letm-1 - protein letm-1, dars-1 - protein dars-1, tom-1 - protein tom-1, ostd-1 - protein ostd-1, ears-2 - protein ears-2, F54D1.6 - protein f5…
GO:0045935	positive regulation of nucleobase-containing compound metabolic process	9.85e-07	4.3e-05	4.8	7788	134	218	18	[jun-1 - protein jun-1, lin-59 - protein lin-59, hlh-30 - protein hlh-30, mef-2 - protein mef-2, cmk-1 - protein cmk-1, ire-1 - protein ire-1, rskn-2 - protein rskn-2, lpin-1 - protein lpin-1, crh-1 - protein crh-1, daf-12 - protein daf-12, pdfr-1 - protein pdfr-1, sma-9 - protein sma-9, ckk-1 - protein ckk-1, tra-1 - protein tra-1, atf-7 - protein atf-7, crtc-1 - protein crtc-1, let-526 - protei…
GO:0031324	negative regulation of cellular metabolic process	1.08e-06	4.65e-05	3.5	7788	177	289	23	[mlt-11 - protein mlt-11, jun-1 - protein jun-1, hbl-1 - protein hbl-1, lin-42 - protein lin-42, nhr-69 - protein nhr-69, flh-2 - protein flh-2, mef-2 - protein mef-2, K09E9.4 - protein k09e9.4, wdr-23 - protein wdr-23, T28C12.6 - protein t28c12.6, blmp-1 - protein blmp-1, lin-14 - protein lin-14, daf-5 - protein daf-5, let-418 - protein let-418, mab-10 - protein mab-10, kin-29 - protein kin-29, …
GO:0012501	programmed cell death	1.08e-06	4.63e-05	1.24	7788	369	4297	252	[itr-1 - protein itr-1, air-1 - protein air-1, eif-3.B - protein eif-3.b, skr-1 - protein skr-1, rpl-19 - protein rpl-19, ubc-9 - protein ubc-9, tbg-1 - protein tbg-1, skr-2 - protein skr-2, atp-3 - protein atp-3, snap-1 - protein snap-1, clec-208 - protein clec-208, paa-1 - protein paa-1, dars-1 - protein dars-1, lpin-1 - protein lpin-1, vha-14 - protein vha-14, eor-2 - protein eor-2, vha-10 - p…
GO:0045597	positive regulation of cell differentiation	1.2e-06	5.07e-05	74.53	7788	11	38	4	[jun-1 - protein jun-1, kin-1 - protein kin-1, gsa-1 - protein gsa-1, unc-73 - protein unc-73]
GO:0006468	protein phosphorylation	1.21e-06	5.08e-05	3.14	7788	310	216	27	[mig-15 - protein mig-15, F47F2.1 - protein f47f2.1, mnk-1 - protein mnk-1, ire-1 - protein ire-1, pkg-2 - protein pkg-2, sma-5 - protein sma-5, ckk-1 - protein ckk-1, pkc-1 - protein pkc-1, Y43C5B.2 - protein y43c5b.2, lit-1 - protein lit-1, kin-20 - protein kin-20, unc-43 - protein unc-43, unc-82 - protein unc-82, kin-1 - protein kin-1, nipi-3 - protein nipi-3, K08F8.1 - protein k08f8.1, akt-1 …
GO:0051172	negative regulation of nitrogen compound metabolic process	1.23e-06	5.1e-05	4.66	7788	104	289	18	[jun-1 - protein jun-1, hbl-1 - protein hbl-1, lin-42 - protein lin-42, nhr-69 - protein nhr-69, flh-2 - protein flh-2, mef-2 - protein mef-2, wdr-23 - protein wdr-23, blmp-1 - protein blmp-1, lin-14 - protein lin-14, daf-5 - protein daf-5, let-418 - protein let-418, mab-10 - protein mab-10, sma-9 - protein sma-9, mai-1 - protein mai-1, tra-1 - protein tra-1, atf-7 - protein atf-7, CELE_Y39E4B.6 …
GO:1902680	positive regulation of RNA biosynthetic process	1.32e-06	5.41e-05	4.98	7788	122	218	17	[jun-1 - protein jun-1, lin-59 - protein lin-59, hlh-30 - protein hlh-30, mef-2 - protein mef-2, cmk-1 - protein cmk-1, ire-1 - protein ire-1, rskn-2 - protein rskn-2, lpin-1 - protein lpin-1, crh-1 - protein crh-1, daf-12 - protein daf-12, sma-9 - protein sma-9, ckk-1 - protein ckk-1, tra-1 - protein tra-1, crtc-1 - protein crtc-1, atf-7 - protein atf-7, let-526 - protein let-526, daf-16 - prote…
GO:0045893	positive regulation of transcription, DNA-templated	1.32e-06	5.36e-05	4.98	7788	122	218	17	[jun-1 - protein jun-1, lin-59 - protein lin-59, hlh-30 - protein hlh-30, mef-2 - protein mef-2, cmk-1 - protein cmk-1, ire-1 - protein ire-1, rskn-2 - protein rskn-2, lpin-1 - protein lpin-1, crh-1 - protein crh-1, daf-12 - protein daf-12, sma-9 - protein sma-9, ckk-1 - protein ckk-1, tra-1 - protein tra-1, crtc-1 - protein crtc-1, atf-7 - protein atf-7, let-526 - protein let-526, daf-16 - prote…
GO:1903508	positive regulation of nucleic acid-templated transcription	1.32e-06	5.31e-05	4.98	7788	122	218	17	[jun-1 - protein jun-1, lin-59 - protein lin-59, hlh-30 - protein hlh-30, mef-2 - protein mef-2, cmk-1 - protein cmk-1, ire-1 - protein ire-1, rskn-2 - protein rskn-2, crh-1 - protein crh-1, lpin-1 - protein lpin-1, daf-12 - protein daf-12, sma-9 - protein sma-9, ckk-1 - protein ckk-1, tra-1 - protein tra-1, crtc-1 - protein crtc-1, atf-7 - protein atf-7, let-526 - protein let-526, daf-16 - prote…
GO:0051254	positive regulation of RNA metabolic process	1.48e-06	5.91e-05	4.94	7788	123	218	17	[jun-1 - protein jun-1, lin-59 - protein lin-59, hlh-30 - protein hlh-30, mef-2 - protein mef-2, cmk-1 - protein cmk-1, ire-1 - protein ire-1, rskn-2 - protein rskn-2, crh-1 - protein crh-1, lpin-1 - protein lpin-1, daf-12 - protein daf-12, sma-9 - protein sma-9, ckk-1 - protein ckk-1, tra-1 - protein tra-1, crtc-1 - protein crtc-1, atf-7 - protein atf-7, let-526 - protein let-526, daf-16 - prote…
GO:0006796	phosphate-containing compound metabolic process	1.48e-06	5.86e-05	2.3	7788	691	216	44	[prl-1 - protein prl-1, dlg-1 - protein dlg-1, R05G6.5 - protein r05g6.5, dgk-1 - protein dgk-1, mig-15 - protein mig-15, F47F2.1 - protein f47f2.1, pde-4 - protein pde-4, scpl-3 - protein scpl-3, mnk-1 - protein mnk-1, ire-1 - protein ire-1, mvk-1 - protein mvk-1, F26A3.4 - protein f26a3.4, lpin-1 - protein lpin-1, sma-5 - protein sma-5, pkg-2 - protein pkg-2, ckk-1 - protein ckk-1, pkc-1 - prot…
GO:0040034	regulation of development, heterochronic	1.5e-06	5.9e-05	15.57	7788	17	206	7	[lin-14 - protein lin-14, daf-12 - protein daf-12, lin-42 - protein lin-42, hbl-1 - protein hbl-1, lin-41 - protein lin-41, daf-2 - protein daf-2, dre-1 - protein dre-1]
GO:0010628	positive regulation of gene expression	1.56e-06	6.05e-05	4.66	7788	138	218	18	[jun-1 - protein jun-1, unc-62 - protein unc-62, lin-59 - protein lin-59, hlh-30 - protein hlh-30, mef-2 - protein mef-2, cmk-1 - protein cmk-1, ire-1 - protein ire-1, rskn-2 - protein rskn-2, crh-1 - protein crh-1, lpin-1 - protein lpin-1, daf-12 - protein daf-12, sma-9 - protein sma-9, ckk-1 - protein ckk-1, tra-1 - protein tra-1, crtc-1 - protein crtc-1, atf-7 - protein atf-7, let-526 - protei…
GO:0009199	ribonucleoside triphosphate metabolic process	1.8e-06	6.93e-05	1.64	7788	55	4143	48	[vha-6 - protein vha-6, gpd-3 - protein gpd-3, R05G6.5 - protein r05g6.5, enol-1 - protein enol-1, pyk-2 - protein pyk-2, pgk-1 - protein pgk-1, atp-4 - protein atp-4, asg-2 - protein asg-2, F19B6.1 - protein f19b6.1, asb-1 - protein asb-1, aldo-1 - protein aldo-1, Y77E11A.1 - protein y77e11a.1, F54C1.6 - protein f54c1.6, atp-3 - protein atp-3, R53.4 - protein r53.4, ctps-1 - protein ctps-1, asg-…
GO:0048856	anatomical structure development	1.84e-06	7.03e-05	1.09	7788	2827	3617	1425	[CELE_C47E8.6 - protein c47e8.6, fzo-1 - protein fzo-1, pri-1 - protein pri-1, sdha-1 - protein sdha-1, hcp-3 - protein hcp-3, tbg-1 - protein tbg-1, rpl-7 - protein rpl-7, nhr-86 - protein nhr-86, T10G3.1 - protein t10g3.1, ubc-7 - protein ubc-7, gei-13 - protein gei-13, C07A9.2 - protein c07a9.2, dars-1 - protein dars-1, ifb-2 - protein ifb-2, B0464.2 - protein b0464.2, ifb-1 - protein ifb-1, v…
GO:0040012	regulation of locomotion	1.97e-06	7.46e-05	2.48	7788	152	723	35	[dgk-1 - protein dgk-1, sup-12 - protein sup-12, egl-30 - protein egl-30, mig-15 - protein mig-15, R13A5.7 - protein r13a5.7, egl-10 - protein egl-10, ctn-1 - protein ctn-1, mca-3 - protein mca-3, wip-1 - protein wip-1, pde-4 - protein pde-4, blmp-1 - protein blmp-1, dyc-1 - protein dyc-1, rab-3 - protein rab-3, gsa-1 - protein gsa-1, pdk-1 - protein pdk-1, egl-27 - protein egl-27, unc-70 - prote…
GO:0030154	cell differentiation	1.99e-06	7.45e-05	14.75	7788	154	24	7	[lin-42 - protein lin-42, apl-1 - protein apl-1, fkh-7 - protein fkh-7, fkh-9 - protein fkh-9, tag-97 - protein tag-97, tra-1 - protein tra-1, daf-16 - protein daf-16]
GO:0009126	purine nucleoside monophosphate metabolic process	2.35e-06	8.75e-05	1.62	7788	58	4143	50	[CELE_T04A8.5 - protein t04a8.5, enol-1 - protein enol-1, asg-2 - protein asg-2, asb-1 - protein asb-1, atp-3 - protein atp-3, R53.4 - protein r53.4, vha-12 - protein vha-12, Y82E9BR.3 - protein y82e9br.3, clk-1 - protein clk-1, F38B6.4 - protein f38b6.4, vha-10 - protein vha-10, R07H5.8 - protein r07h5.8, dlat-1 - protein dlat-1, mig-23 - protein mig-23, cyc-1 - protein cyc-1, atp-2 - protein at…
GO:0009167	purine ribonucleoside monophosphate metabolic process	2.35e-06	8.68e-05	1.62	7788	58	4143	50	[CELE_T04A8.5 - protein t04a8.5, enol-1 - protein enol-1, asg-2 - protein asg-2, asb-1 - protein asb-1, R53.4 - protein r53.4, atp-3 - protein atp-3, vha-12 - protein vha-12, Y82E9BR.3 - protein y82e9br.3, clk-1 - protein clk-1, F38B6.4 - protein f38b6.4, vha-10 - protein vha-10, R07H5.8 - protein r07h5.8, dlat-1 - protein dlat-1, mig-23 - protein mig-23, cyc-1 - protein cyc-1, atp-2 - protein at…
GO:0006915	apoptotic process	2.53e-06	9.23e-05	1.23	7788	360	4297	245	[air-1 - protein air-1, eif-3.B - protein eif-3.b, skr-1 - protein skr-1, rpl-19 - protein rpl-19, ubc-9 - protein ubc-9, tbg-1 - protein tbg-1, skr-2 - protein skr-2, atp-3 - protein atp-3, paa-1 - protein paa-1, clec-208 - protein clec-208, snap-1 - protein snap-1, dars-1 - protein dars-1, lpin-1 - protein lpin-1, vha-14 - protein vha-14, eor-2 - protein eor-2, vha-10 - protein vha-10, aex-3 - …
GO:0006793	phosphorus metabolic process	2.71e-06	9.83e-05	2.25	7788	705	216	44	[prl-1 - protein prl-1, dlg-1 - protein dlg-1, R05G6.5 - protein r05g6.5, dgk-1 - protein dgk-1, mig-15 - protein mig-15, F47F2.1 - protein f47f2.1, pde-4 - protein pde-4, scpl-3 - protein scpl-3, mnk-1 - protein mnk-1, ire-1 - protein ire-1, mvk-1 - protein mvk-1, F26A3.4 - protein f26a3.4, lpin-1 - protein lpin-1, sma-5 - protein sma-5, pkg-2 - protein pkg-2, ckk-1 - protein ckk-1, pkc-1 - prot…
GO:0006090	pyruvate metabolic process	2.79e-06	0.0001	2.69	7788	18	2735	17	[gpd-3 - protein gpd-3, enol-1 - protein enol-1, pyk-1 - protein pyk-1, pyk-2 - protein pyk-2, pgk-1 - protein pgk-1, tpi-1 - protein tpi-1, aldo-1 - protein aldo-1, Y77E11A.1 - protein y77e11a.1, aldo-2 - protein aldo-2, H25P06.1 - protein h25p06.1, gpi-1 - protein gpi-1, ogdh-1 - protein ogdh-1, pyc-1 - protein pyc-1, F57B10.3 - protein f57b10.3, pdha-1 - protein pdha-1, dlat-1 - protein dlat-1…
GO:0044710	single-organism metabolic process	2.96e-06	0.000106	1.14	7788	1189	3921	680	[C48B4.1 - protein c48b4.1, F22F7.1 - protein f22f7.1, cyp-34A1 - protein cyp-34a1, C47F8.3 - protein c47f8.3, sdha-1 - protein sdha-1, fmo-4 - protein fmo-4, cdd-1 - protein cdd-1, ugt-60 - protein ugt-60, cyp-33D1 - protein cyp-33d1, cyp-35A2 - protein cyp-35a2, dars-1 - protein dars-1, cyp-33C5 - protein cyp-33c5, lpin-1 - protein lpin-1, ugt-32 - protein ugt-32, F56C11.3 - protein f56c11.3, s…
GO:0007166	cell surface receptor signaling pathway	2.98e-06	0.000105	3.17	7788	165	357	24	[mab-31 - protein mab-31, soc-2 - protein soc-2, nipi-3 - protein nipi-3, K08F8.1 - protein k08f8.1, akt-2 - protein akt-2, trk-1 - protein trk-1, akt-1 - protein akt-1, mnk-1 - protein mnk-1, pkg-1 - protein pkg-1, dbl-1 - protein dbl-1, csnk-1 - protein csnk-1, CELE_Y64G10A.6 - protein y64g10a.6, egl-27 - protein egl-27, kin-29 - protein kin-29, sma-9 - protein sma-9, sma-10 - protein sma-10, s…
GO:0008219	cell death	3.1e-06	0.000109	1.22	7788	403	4297	271	[itr-1 - protein itr-1, eif-3.B - protein eif-3.b, air-1 - protein air-1, skr-1 - protein skr-1, coq-1 - protein coq-1, rpl-19 - protein rpl-19, tbg-1 - protein tbg-1, ubc-9 - protein ubc-9, skr-2 - protein skr-2, atp-3 - protein atp-3, clec-208 - protein clec-208, paa-1 - protein paa-1, snap-1 - protein snap-1, dars-1 - protein dars-1, lpin-1 - protein lpin-1, vha-14 - protein vha-14, eor-2 - pr…
GO:0016265	death	3.1e-06	0.000108	1.22	7788	403	4297	271	[itr-1 - protein itr-1, eif-3.B - protein eif-3.b, air-1 - protein air-1, skr-1 - protein skr-1, coq-1 - protein coq-1, rpl-19 - protein rpl-19, tbg-1 - protein tbg-1, ubc-9 - protein ubc-9, skr-2 - protein skr-2, atp-3 - protein atp-3, clec-208 - protein clec-208, paa-1 - protein paa-1, snap-1 - protein snap-1, dars-1 - protein dars-1, lpin-1 - protein lpin-1, vha-14 - protein vha-14, eor-2 - pr…
GO:0010604	positive regulation of macromolecule metabolic process	3.48e-06	0.00012	4.04	7788	195	178	18	[unc-62 - protein unc-62, lin-59 - protein lin-59, jun-1 - protein jun-1, mig-15 - protein mig-15, hlh-30 - protein hlh-30, mef-2 - protein mef-2, mbk-2 - protein mbk-2, ire-1 - protein ire-1, rskn-2 - protein rskn-2, lpin-1 - protein lpin-1, crh-1 - protein crh-1, daf-12 - protein daf-12, sma-9 - protein sma-9, ckk-1 - protein ckk-1, crtc-1 - protein crtc-1, tra-1 - protein tra-1, let-526 - prot…
GO:0045944	positive regulation of transcription from RNA polymerase II promoter	3.65e-06	0.000125	4.93	7788	116	218	16	[jun-1 - protein jun-1, lin-59 - protein lin-59, hlh-30 - protein hlh-30, mef-2 - protein mef-2, cmk-1 - protein cmk-1, ire-1 - protein ire-1, rskn-2 - protein rskn-2, lpin-1 - protein lpin-1, crh-1 - protein crh-1, daf-12 - protein daf-12, sma-9 - protein sma-9, tra-1 - protein tra-1, atf-7 - protein atf-7, crtc-1 - protein crtc-1, let-526 - protein let-526, daf-16 - protein daf-16]
GO:0034654	nucleobase-containing compound biosynthetic process	4.13e-06	0.00014	5.69	7788	587	28	12	[lin-14 - protein lin-14, jun-1 - protein jun-1, daf-12 - protein daf-12, hbl-1 - protein hbl-1, lin-42 - protein lin-42, nhr-14 - protein nhr-14, nhr-40 - protein nhr-40, fkh-7 - protein fkh-7, hlh-30 - protein hlh-30, fkh-9 - protein fkh-9, tag-97 - protein tag-97, daf-16 - protein daf-16]
GO:0051179	localization	4.2e-06	0.000141	1.12	7788	1890	3448	933	[ttr-48 - protein ttr-48, tbg-1 - protein tbg-1, nhr-86 - protein nhr-86, lbp-9 - protein lbp-9, ehs-1 - protein ehs-1, C07A9.2 - protein c07a9.2, dars-1 - protein dars-1, rab-3 - protein rab-3, K05F1.6 - protein k05f1.6, vha-14 - protein vha-14, ifb-1 - protein ifb-1, C18A3.4 - protein c18a3.4, sec-15 - protein sec-15, catp-5 - protein catp-5, T11G6.4 - protein t11g6.4, abts-3 - protein abts-3, …
GO:0044711	single-organism biosynthetic process	4.71e-06	0.000157	1.26	7788	313	4094	207	[C48B4.1 - protein c48b4.1, coq-1 - protein coq-1, atp-3 - protein atp-3, R53.4 - protein r53.4, lpin-1 - protein lpin-1, asns-2 - protein asns-2, CELE_F38E1.9 - protein f38e1.9, clk-1 - protein clk-1, vha-10 - protein vha-10, R07H5.8 - protein r07h5.8, F55G1.9 - protein f55g1.9, rib-1 - protein rib-1, gars-1 - protein gars-1, dao-3 - protein dao-3, elo-7 - protein elo-7, emb-8 - protein emb-8, s…
GO:0046777	protein autophosphorylation	4.74e-06	0.000157	6.23	7788	42	357	12	[prk-1 - protein prk-1, kin-29 - protein kin-29, tlk-1 - protein tlk-1, nipi-3 - protein nipi-3, K08F8.1 - protein k08f8.1, daf-2 - protein daf-2, trk-1 - protein trk-1, mnk-1 - protein mnk-1, Y43C5B.2 - protein y43c5b.2, cmk-1 - protein cmk-1, mbk-2 - protein mbk-2, ZK622.1 - protein zk622.1]
GO:0009161	ribonucleoside monophosphate metabolic process	5.27e-06	0.000173	1.58	7788	63	4143	53	[CELE_T04A8.5 - protein t04a8.5, enol-1 - protein enol-1, asg-2 - protein asg-2, asb-1 - protein asb-1, F19B6.1 - protein f19b6.1, R53.4 - protein r53.4, atp-3 - protein atp-3, vha-12 - protein vha-12, Y82E9BR.3 - protein y82e9br.3, clk-1 - protein clk-1, F38B6.4 - protein f38b6.4, vha-10 - protein vha-10, R07H5.8 - protein r07h5.8, dlat-1 - protein dlat-1, mig-23 - protein mig-23, umps-1 - prote…
GO:0019438	aromatic compound biosynthetic process	5.53e-06	0.000181	5.51	7788	606	28	12	[lin-14 - protein lin-14, jun-1 - protein jun-1, daf-12 - protein daf-12, hbl-1 - protein hbl-1, lin-42 - protein lin-42, nhr-14 - protein nhr-14, nhr-40 - protein nhr-40, fkh-7 - protein fkh-7, hlh-30 - protein hlh-30, fkh-9 - protein fkh-9, tag-97 - protein tag-97, daf-16 - protein daf-16]
GO:0018130	heterocycle biosynthetic process	6.86e-06	0.000222	5.41	7788	617	28	12	[lin-14 - protein lin-14, jun-1 - protein jun-1, daf-12 - protein daf-12, hbl-1 - protein hbl-1, lin-42 - protein lin-42, nhr-14 - protein nhr-14, nhr-40 - protein nhr-40, fkh-7 - protein fkh-7, hlh-30 - protein hlh-30, fkh-9 - protein fkh-9, tag-97 - protein tag-97, daf-16 - protein daf-16]
GO:0006412	translation	6.87e-06	0.000221	1.41	7788	154	3666	102	[rpl-9 - protein rpl-9, W01D2.1 - protein w01d2.1, rpl-19 - protein rpl-19, qars-1 - protein qars-1, rps-14 - protein rps-14, eif-1.A - protein eif-1.a, rpl-36 - protein rpl-36, T23F2.2 - protein t23f2.2, dars-1 - protein dars-1, rps-21 - protein rps-21, rps-18 - protein rps-18, ears-2 - protein ears-2, rpl-6 - protein rpl-6, mrpl-17 - protein mrpl-17, mrpl-9 - protein mrpl-9, gars-1 - protein ga…
GO:0006757	ATP generation from ADP	6.93e-06	0.000221	2.68	7788	17	2735	16	[gpd-3 - protein gpd-3, enol-1 - protein enol-1, pyk-1 - protein pyk-1, pyk-2 - protein pyk-2, pgk-1 - protein pgk-1, tpi-1 - protein tpi-1, aldo-1 - protein aldo-1, Y77E11A.1 - protein y77e11a.1, aldo-2 - protein aldo-2, H25P06.1 - protein h25p06.1, gpi-1 - protein gpi-1, ogdh-1 - protein ogdh-1, F57B10.3 - protein f57b10.3, pdha-1 - protein pdha-1, dlat-1 - protein dlat-1, F14B4.2 - protein f14…
GO:0006096	glycolytic process	6.93e-06	0.000219	2.68	7788	17	2735	16	[gpd-3 - protein gpd-3, enol-1 - protein enol-1, pyk-1 - protein pyk-1, pyk-2 - protein pyk-2, pgk-1 - protein pgk-1, tpi-1 - protein tpi-1, aldo-1 - protein aldo-1, Y77E11A.1 - protein y77e11a.1, aldo-2 - protein aldo-2, H25P06.1 - protein h25p06.1, gpi-1 - protein gpi-1, ogdh-1 - protein ogdh-1, F57B10.3 - protein f57b10.3, pdha-1 - protein pdha-1, dlat-1 - protein dlat-1, F14B4.2 - protein f14…
GO:0031325	positive regulation of cellular metabolic process	7.23e-06	0.000227	3.84	7788	205	178	18	[unc-62 - protein unc-62, lin-59 - protein lin-59, jun-1 - protein jun-1, mig-15 - protein mig-15, hlh-30 - protein hlh-30, mef-2 - protein mef-2, ire-1 - protein ire-1, rskn-2 - protein rskn-2, lpin-1 - protein lpin-1, crh-1 - protein crh-1, daf-12 - protein daf-12, pdfr-1 - protein pdfr-1, sma-9 - protein sma-9, ckk-1 - protein ckk-1, crtc-1 - protein crtc-1, tra-1 - protein tra-1, let-526 - pr…
GO:0044767	single-organism developmental process	7.54e-06	0.000235	1.07	7788	3149	3617	1571	[dpy-6 - protein dpy-6, pri-1 - protein pri-1, sdha-1 - protein sdha-1, hcp-3 - protein hcp-3, tbg-1 - protein tbg-1, rpl-7 - protein rpl-7, ubc-7 - protein ubc-7, gei-13 - protein gei-13, C07A9.2 - protein c07a9.2, dars-1 - protein dars-1, B0464.2 - protein b0464.2, vha-14 - protein vha-14, ztf-3 - protein ztf-3, CELE_R119.1 - protein r119.1, taf-4 - protein taf-4, rgr-1 - protein rgr-1, CELE_R1…
GO:0046031	ADP metabolic process	7.61e-06	0.000236	2.56	7788	20	2741	18	[gpd-3 - protein gpd-3, enol-1 - protein enol-1, pyk-1 - protein pyk-1, pyk-2 - protein pyk-2, pgk-1 - protein pgk-1, tpi-1 - protein tpi-1, aldo-1 - protein aldo-1, Y77E11A.1 - protein y77e11a.1, aldo-2 - protein aldo-2, let-754 - protein let-754, H25P06.1 - protein h25p06.1, gpi-1 - protein gpi-1, ogdh-1 - protein ogdh-1, F38B2.4 - protein f38b2.4, F57B10.3 - protein f57b10.3, pdha-1 - protein …
GO:0008152	metabolic process	8.25e-06	0.000254	1.06	7788	3566	3957	1922	[kin-9 - protein kin-9, C48B4.1 - protein c48b4.1, nhr-14 - protein nhr-14, pri-1 - protein pri-1, sdha-1 - protein sdha-1, hlh-11 - protein hlh-11, tbg-1 - protein tbg-1, ubc-7 - protein ubc-7, ugt-60 - protein ugt-60, C07A9.2 - protein c07a9.2, dars-1 - protein dars-1, F56C11.3 - protein f56c11.3, sod-4 - protein sod-4, ugt-32 - protein ugt-32, asns-2 - protein asns-2, catp-5 - protein catp-5, …
GO:1901362	organic cyclic compound biosynthetic process	8.37e-06	0.000256	5.31	7788	629	28	12	[lin-14 - protein lin-14, jun-1 - protein jun-1, daf-12 - protein daf-12, hbl-1 - protein hbl-1, lin-42 - protein lin-42, nhr-14 - protein nhr-14, nhr-40 - protein nhr-40, fkh-7 - protein fkh-7, hlh-30 - protein hlh-30, fkh-9 - protein fkh-9, tag-97 - protein tag-97, daf-16 - protein daf-16]
GO:0032502	developmental process	8.76e-06	0.000266	1.07	7788	3195	3617	1592	[dpy-6 - protein dpy-6, pri-1 - protein pri-1, sdha-1 - protein sdha-1, hcp-3 - protein hcp-3, tbg-1 - protein tbg-1, rpl-7 - protein rpl-7, ubc-7 - protein ubc-7, gei-13 - protein gei-13, C07A9.2 - protein c07a9.2, dars-1 - protein dars-1, B0464.2 - protein b0464.2, vha-14 - protein vha-14, ztf-3 - protein ztf-3, CELE_R119.1 - protein r119.1, taf-4 - protein taf-4, rgr-1 - protein rgr-1, CELE_R1…
GO:0019752	carboxylic acid metabolic process	8.85e-06	0.000266	1.3	7788	252	3820	161	[C48B4.1 - protein c48b4.1, tag-38 - protein tag-38, sdha-1 - protein sdha-1, H10D18.6 - protein h10d18.6, qars-1 - protein qars-1, ugt-60 - protein ugt-60, dars-1 - protein dars-1, lpin-1 - protein lpin-1, ugt-32 - protein ugt-32, ears-2 - protein ears-2, sucl-1 - protein sucl-1, elo-1 - protein elo-1, asns-2 - protein asns-2, mthf-1 - protein mthf-1, idh-1 - protein idh-1, B0228.7 - protein b02…
GO:0044255	cellular lipid metabolic process	8.94e-06	0.000267	1.35	7788	164	4094	116	[T20D3.8 - protein t20d3.8, C48B4.1 - protein c48b4.1, hpo-4 - protein hpo-4, ttx-7 - protein ttx-7, coq-1 - protein coq-1, F37C12.3 - protein f37c12.3, CELE_Y54E10BR.1 - protein y54e10br.1, lpin-1 - protein lpin-1, elo-1 - protein elo-1, CELE_F38E1.9 - protein f38e1.9, psd-1 - protein psd-1, inos-1 - protein inos-1, elo-7 - protein elo-7, ZK669.4 - protein zk669.4, cka-1 - protein cka-1, cept-1 …
GO:0046034	ATP metabolic process	9.4e-06	0.000279	1.64	7788	48	4143	42	[vha-6 - protein vha-6, gpd-3 - protein gpd-3, enol-1 - protein enol-1, pyk-2 - protein pyk-2, pgk-1 - protein pgk-1, atp-4 - protein atp-4, asg-2 - protein asg-2, asb-1 - protein asb-1, aldo-1 - protein aldo-1, Y77E11A.1 - protein y77e11a.1, R53.4 - protein r53.4, atp-3 - protein atp-3, asg-1 - protein asg-1, vha-12 - protein vha-12, Y82E9BR.3 - protein y82e9br.3, clk-1 - protein clk-1, vha-10 -…
GO:0051648	vesicle localization	9.9e-06	0.000292	3.23	7788	30	1448	18	[dhc-1 - protein dhc-1, sng-1 - protein sng-1, lis-1 - protein lis-1, unc-116 - protein unc-116, snt-3 - protein snt-3, nud-2 - protein nud-2, unc-104 - protein unc-104, ehs-1 - protein ehs-1, klc-2 - protein klc-2, unc-14 - protein unc-14, rab-3 - protein rab-3, snb-1 - protein snb-1, jnk-1 - protein jnk-1, unc-11 - protein unc-11, rbf-1 - protein rbf-1, aex-6 - protein aex-6, sad-1 - protein sa…
GO:0006082	organic acid metabolic process	1.02e-05	0.000297	1.25	7788	283	4301	195	[C48B4.1 - protein c48b4.1, cyp-34A1 - protein cyp-34a1, sdha-1 - protein sdha-1, ugt-60 - protein ugt-60, cyp-35A2 - protein cyp-35a2, cyp-33D1 - protein cyp-33d1, dars-1 - protein dars-1, cyp-33C5 - protein cyp-33c5, lpin-1 - protein lpin-1, ugt-32 - protein ugt-32, ears-2 - protein ears-2, sucl-1 - protein sucl-1, asns-2 - protein asns-2, glna-1 - protein glna-1, F55G1.9 - protein f55g1.9, cyp…
GO:0006091	generation of precursor metabolites and energy	1.03e-05	0.0003	1.96	7788	51	2799	36	[gpd-3 - protein gpd-3, enol-1 - protein enol-1, ogt-1 - protein ogt-1, pyk-2 - protein pyk-2, pgk-1 - protein pgk-1, R05F9.6 - protein r05f9.6, sdha-1 - protein sdha-1, isp-1 - protein isp-1, aldo-1 - protein aldo-1, Y77E11A.1 - protein y77e11a.1, aagr-2 - protein aagr-2, C18E9.4 - protein c18e9.4, nuo-1 - protein nuo-1, CELE_F53F4.10 - protein f53f4.10, gsy-1 - protein gsy-1, C14B9.10 - protein…
GO:0051234	establishment of localization	1.04e-05	0.0003	1.12	7788	1526	3543	780	[tbg-1 - protein tbg-1, lbp-9 - protein lbp-9, ehs-1 - protein ehs-1, C07A9.2 - protein c07a9.2, dars-1 - protein dars-1, rab-3 - protein rab-3, K05F1.6 - protein k05f1.6, ifb-1 - protein ifb-1, vha-14 - protein vha-14, C18A3.4 - protein c18a3.4, sec-15 - protein sec-15, catp-5 - protein catp-5, T11G6.4 - protein t11g6.4, abts-3 - protein abts-3, gpr-2 - protein gpr-2, rheb-1 - protein rheb-1, Y6…
GO:0009893	positive regulation of metabolic process	1.25e-05	0.00036	3.18	7788	303	178	22	[unc-62 - protein unc-62, lin-59 - protein lin-59, jun-1 - protein jun-1, mig-15 - protein mig-15, egl-10 - protein egl-10, hlh-30 - protein hlh-30, pac-1 - protein pac-1, mef-2 - protein mef-2, mbk-2 - protein mbk-2, ire-1 - protein ire-1, rskn-2 - protein rskn-2, lpin-1 - protein lpin-1, crh-1 - protein crh-1, daf-12 - protein daf-12, pdfr-1 - protein pdfr-1, sma-9 - protein sma-9, ckk-1 - prot…
GO:0034645	cellular macromolecule biosynthetic process	1.36e-05	0.000387	5.09	7788	656	28	12	[lin-14 - protein lin-14, jun-1 - protein jun-1, daf-12 - protein daf-12, hbl-1 - protein hbl-1, lin-42 - protein lin-42, nhr-14 - protein nhr-14, nhr-40 - protein nhr-40, fkh-7 - protein fkh-7, hlh-30 - protein hlh-30, fkh-9 - protein fkh-9, tag-97 - protein tag-97, daf-16 - protein daf-16]
GO:0009141	nucleoside triphosphate metabolic process	1.45e-05	0.00041	1.79	7788	57	3213	42	[gpd-3 - protein gpd-3, R05G6.5 - protein r05g6.5, enol-1 - protein enol-1, pyk-2 - protein pyk-2, pgk-1 - protein pgk-1, atp-4 - protein atp-4, asg-2 - protein asg-2, asb-1 - protein asb-1, F19B6.1 - protein f19b6.1, aldo-1 - protein aldo-1, Y77E11A.1 - protein y77e11a.1, F54C1.6 - protein f54c1.6, atp-3 - protein atp-3, asg-1 - protein asg-1, vha-12 - protein vha-12, Y82E9BR.3 - protein y82e9br…
GO:0051186	cofactor metabolic process	1.55e-05	0.000437	1.5	7788	88	4025	68	[enol-1 - protein enol-1, gspd-1 - protein gspd-1, coq-1 - protein coq-1, pnk-1 - protein pnk-1, Y53G8AL.2 - protein y53g8al.2, CELE_Y18D10A.3 - protein y18d10a.3, CELE_Y57G11C.3 - protein y57g11c.3, mthf-1 - protein mthf-1, clk-1 - protein clk-1, C44B7.10 - protein c44b7.10, dlat-1 - protein dlat-1, dao-3 - protein dao-3, M01F1.3 - protein m01f1.3, C28H8.11 - protein c28h8.11, moc-2 - protein mo…
GO:0030036	actin cytoskeleton organization	1.57e-05	0.000439	2.61	7788	149	621	31	[unc-23 - protein unc-23, rmd-2 - protein rmd-2, F47F2.1 - protein f47f2.1, rga-5 - protein rga-5, ric-7 - protein ric-7, wip-1 - protein wip-1, unc-15 - protein unc-15, chc-1 - protein chc-1, unc-87 - protein unc-87, unc-94 - protein unc-94, dyc-1 - protein dyc-1, vab-10 - protein vab-10, tmd-2 - protein tmd-2, F32B5.7 - protein f32b5.7, unc-82 - protein unc-82, D2030.2 - protein d2030.2, C02F5.…
GO:0044724	single-organism carbohydrate catabolic process	1.61e-05	0.000446	2.32	7788	27	2735	22	[gpd-3 - protein gpd-3, enol-1 - protein enol-1, T25G3.4 - protein t25g3.4, pyk-1 - protein pyk-1, pgk-1 - protein pgk-1, pyk-2 - protein pyk-2, R05F9.6 - protein r05f9.6, tpi-1 - protein tpi-1, dhs-21 - protein dhs-21, Y77E11A.1 - protein y77e11a.1, aldo-1 - protein aldo-1, aagr-2 - protein aagr-2, aldo-2 - protein aldo-2, R11F4.1 - protein r11f4.1, H25P06.1 - protein h25p06.1, gpi-1 - protein g…
GO:0043623	cellular protein complex assembly	1.63e-05	0.000448	1.44	7788	163	3150	95	[tba-4 - protein tba-4, tbb-1 - protein tbb-1, C50F2.4 - protein c50f2.4, F47F2.1 - protein f47f2.1, hcp-3 - protein hcp-3, tbg-1 - protein tbg-1, tba-9 - protein tba-9, F16D3.4 - protein f16d3.4, B0035.15 - protein b0035.15, unc-15 - protein unc-15, glb-18 - protein glb-18, nuo-1 - protein nuo-1, tom-1 - protein tom-1, vab-10 - protein vab-10, C56G2.7 - protein c56g2.7, smn-1 - protein smn-1, un…
GO:0044237	cellular metabolic process	1.72e-05	0.000472	1.08	7788	2339	4067	1319	[kin-9 - protein kin-9, C48B4.1 - protein c48b4.1, nhr-14 - protein nhr-14, cyp-34A1 - protein cyp-34a1, pri-1 - protein pri-1, C47F8.3 - protein c47f8.3, sdha-1 - protein sdha-1, hlh-11 - protein hlh-11, cdd-1 - protein cdd-1, ubc-7 - protein ubc-7, nhr-86 - protein nhr-86, ugt-60 - protein ugt-60, C07A9.2 - protein c07a9.2, dars-1 - protein dars-1, nhr-59 - protein nhr-59, cyp-33C5 - protein cy…
GO:0007167	enzyme linked receptor protein signaling pathway	1.73e-05	0.000472	4.02	7788	83	397	17	[mab-31 - protein mab-31, soc-2 - protein soc-2, akt-2 - protein akt-2, akt-1 - protein akt-1, trk-1 - protein trk-1, pkg-1 - protein pkg-1, dbl-1 - protein dbl-1, C08G9.1 - protein c08g9.1, sma-9 - protein sma-9, kin-29 - protein kin-29, sma-10 - protein sma-10, sma-2 - protein sma-2, pkc-1 - protein pkc-1, daf-2 - protein daf-2, Y43C5B.2 - protein y43c5b.2, ZK622.1 - protein zk622.1, daf-16 - p…
GO:0006936	muscle contraction	1.75e-05	0.000473	5.17	7788	31	583	12	[ztf-19 - protein ztf-19, ccb-1 - protein ccb-1, myo-3 - protein myo-3, egl-19 - protein egl-19, jph-1 - protein jph-1, etr-1 - protein etr-1, pat-12 - protein pat-12, unc-54 - protein unc-54, fat-3 - protein fat-3, lev-11 - protein lev-11, pat-2 - protein pat-2, unc-112 - protein unc-112]
GO:0003012	muscle system process	1.75e-05	0.00047	5.17	7788	31	583	12	[ccb-1 - protein ccb-1, ztf-19 - protein ztf-19, myo-3 - protein myo-3, egl-19 - protein egl-19, jph-1 - protein jph-1, etr-1 - protein etr-1, pat-12 - protein pat-12, unc-54 - protein unc-54, fat-3 - protein fat-3, lev-11 - protein lev-11, pat-2 - protein pat-2, unc-112 - protein unc-112]
GO:0009059	macromolecule biosynthetic process	1.77e-05	0.000473	4.95	7788	674	28	12	[lin-14 - protein lin-14, jun-1 - protein jun-1, daf-12 - protein daf-12, hbl-1 - protein hbl-1, lin-42 - protein lin-42, nhr-14 - protein nhr-14, nhr-40 - protein nhr-40, fkh-7 - protein fkh-7, hlh-30 - protein hlh-30, fkh-9 - protein fkh-9, tag-97 - protein tag-97, daf-16 - protein daf-16]
GO:0006810	transport	1.78e-05	0.000473	1.12	7788	1461	3543	747	[itr-1 - protein itr-1, cav-2 - protein cav-2, F30A10.9 - protein f30a10.9, eea-1 - protein eea-1, skr-1 - protein skr-1, gut-2 - protein gut-2, W01D2.5 - protein w01d2.5, tbg-1 - protein tbg-1, lbp-9 - protein lbp-9, ehs-1 - protein ehs-1, C07A9.2 - protein c07a9.2, atgp-2 - protein atgp-2, nhx-8 - protein nhx-8, letm-1 - protein letm-1, dars-1 - protein dars-1, lpin-1 - protein lpin-1, dif-1 - …
GO:0010941	regulation of cell death	1.82e-05	0.000479	2.84	7788	104	685	26	[cmd-1 - protein cmd-1, mig-15 - protein mig-15, gck-1 - protein gck-1, rme-1 - protein rme-1, pme-5 - protein pme-5, tig-3 - protein tig-3, ire-1 - protein ire-1, dbl-1 - protein dbl-1, unc-68 - protein unc-68, tig-2 - protein tig-2, sptf-3 - protein sptf-3, CELE_Y47G6A.5 - protein y47g6a.5, tra-1 - protein tra-1, Y43C5B.2 - protein y43c5b.2, daf-16 - protein daf-16, ZK622.1 - protein zk622.1, u…
GO:0010720	positive regulation of cell development	1.88e-05	0.000493	87.83	7788	7	38	3	[gsa-1 - protein gsa-1, kin-1 - protein kin-1, unc-73 - protein unc-73]
GO:0043043	peptide biosynthetic process	1.95e-05	0.000508	1.38	7788	158	3666	103	[rpl-9 - protein rpl-9, W01D2.1 - protein w01d2.1, rpl-19 - protein rpl-19, qars-1 - protein qars-1, eif-1.A - protein eif-1.a, rps-14 - protein rps-14, rpl-36 - protein rpl-36, T23F2.2 - protein t23f2.2, dars-1 - protein dars-1, rps-21 - protein rps-21, rps-18 - protein rps-18, ears-2 - protein ears-2, rpl-6 - protein rpl-6, mrpl-17 - protein mrpl-17, mrpl-9 - protein mrpl-9, mrps-7 - protein mr…
GO:0043436	oxoacid metabolic process	1.98e-05	0.000512	1.25	7788	262	4301	181	[C48B4.1 - protein c48b4.1, sqv-6 - protein sqv-6, tag-38 - protein tag-38, sdha-1 - protein sdha-1, H10D18.6 - protein h10d18.6, qars-1 - protein qars-1, F37C12.3 - protein f37c12.3, ugt-60 - protein ugt-60, dars-1 - protein dars-1, lpin-1 - protein lpin-1, ugt-32 - protein ugt-32, ears-2 - protein ears-2, sucl-1 - protein sucl-1, elo-1 - protein elo-1, asns-2 - protein asns-2, mthf-1 - protein …
GO:0043603	cellular amide metabolic process	2.1e-05	0.000541	1.32	7788	210	3824	136	[rpl-9 - protein rpl-9, W01D2.1 - protein w01d2.1, rpl-19 - protein rpl-19, qars-1 - protein qars-1, rps-14 - protein rps-14, eif-1.A - protein eif-1.a, rpl-36 - protein rpl-36, T23F2.2 - protein t23f2.2, dars-1 - protein dars-1, rps-21 - protein rps-21, rps-18 - protein rps-18, ears-2 - protein ears-2, rpl-6 - protein rpl-6, asns-2 - protein asns-2, pam-1 - protein pam-1, mthf-1 - protein mthf-1…
GO:0009123	nucleoside monophosphate metabolic process	2.4e-05	0.000614	1.54	7788	66	4143	54	[CELE_T04A8.5 - protein t04a8.5, enol-1 - protein enol-1, asg-2 - protein asg-2, F19B6.1 - protein f19b6.1, asb-1 - protein asb-1, atp-3 - protein atp-3, R53.4 - protein r53.4, vha-12 - protein vha-12, Y82E9BR.3 - protein y82e9br.3, clk-1 - protein clk-1, F38B6.4 - protein f38b6.4, vha-10 - protein vha-10, R07H5.8 - protein r07h5.8, dlat-1 - protein dlat-1, mig-23 - protein mig-23, umps-1 - prote…
GO:0007015	actin filament organization	2.46e-05	0.000627	7.19	7788	24	406	9	[unc-94 - protein unc-94, eps-8 - protein eps-8, fln-1 - protein fln-1, pfn-2 - protein pfn-2, tmd-2 - protein tmd-2, unc-60 - protein unc-60, lev-11 - protein lev-11, zoo-1 - protein zoo-1, unc-87 - protein unc-87]
GO:0018996	molting cycle, collagen and cuticulin-based cuticle	2.61e-05	0.000659	1.38	7788	242	2913	125	[vps-37 - protein vps-37, pas-6 - protein pas-6, rps-14 - protein rps-14, bus-8 - protein bus-8, vha-15 - protein vha-15, lir-1 - protein lir-1, snap-1 - protein snap-1, rps-21 - protein rps-21, dpy-31 - protein dpy-31, nhr-23 - protein nhr-23, ifb-1 - protein ifb-1, ifc-2 - protein ifc-2, rps-11 - protein rps-11, T19B10.2 - protein t19b10.2, rps-19 - protein rps-19, vha-4 - protein vha-4, sar-1 …
GO:0042303	molting cycle	2.61e-05	0.000656	1.38	7788	242	2913	125	[vps-37 - protein vps-37, pas-6 - protein pas-6, rps-14 - protein rps-14, bus-8 - protein bus-8, vha-15 - protein vha-15, lir-1 - protein lir-1, snap-1 - protein snap-1, rps-21 - protein rps-21, dpy-31 - protein dpy-31, nhr-23 - protein nhr-23, ifb-1 - protein ifb-1, ifc-2 - protein ifc-2, rps-11 - protein rps-11, T19B10.2 - protein t19b10.2, rps-19 - protein rps-19, vha-4 - protein vha-4, sar-1 …
GO:0044262	cellular carbohydrate metabolic process	2.75e-05	0.000687	2.96	7788	49	1127	21	[inos-1 - protein inos-1, T25G3.4 - protein t25g3.4, ogt-1 - protein ogt-1, tre-1 - protein tre-1, R05F9.6 - protein r05f9.6, CC8.2 - protein cc8.2, icl-1 - protein icl-1, tps-2 - protein tps-2, R11F4.1 - protein r11f4.1, gob-1 - protein gob-1, H25P06.1 - protein h25p06.1, gsy-1 - protein gsy-1, mtm-3 - protein mtm-3, gyg-1 - protein gyg-1, tre-2 - protein tre-2, H18N23.2 - protein h18n23.2, T22F…
GO:0016043	cellular component organization	2.77e-05	0.000689	1.64	7788	1011	395	84	[pptr-1 - protein pptr-1, dlg-1 - protein dlg-1, mig-15 - protein mig-15, F47F2.1 - protein f47f2.1, klp-3 - protein klp-3, hlh-11 - protein hlh-11, anc-1 - protein anc-1, btbd-10 - protein btbd-10, unc-15 - protein unc-15, klc-2 - protein klc-2, blmp-1 - protein blmp-1, dbl-1 - protein dbl-1, lpin-1 - protein lpin-1, dyc-1 - protein dyc-1, jph-1 - protein jph-1, sgn-1 - protein sgn-1, vab-10 - p…
GO:0071704	organic substance metabolic process	2.78e-05	0.000688	1.07	7788	2699	3949	1468	[kin-9 - protein kin-9, C48B4.1 - protein c48b4.1, nhr-14 - protein nhr-14, cyp-34A1 - protein cyp-34a1, C47F8.3 - protein c47f8.3, pri-1 - protein pri-1, sdha-1 - protein sdha-1, hlh-11 - protein hlh-11, cdd-1 - protein cdd-1, nhr-86 - protein nhr-86, ubc-7 - protein ubc-7, ugt-60 - protein ugt-60, C07A9.2 - protein c07a9.2, nhr-59 - protein nhr-59, dars-1 - protein dars-1, cyp-33C5 - protein cy…
GO:0051650	establishment of vesicle localization	2.98e-05	0.000732	3.15	7788	29	1448	17	[dhc-1 - protein dhc-1, sng-1 - protein sng-1, lis-1 - protein lis-1, unc-116 - protein unc-116, snt-3 - protein snt-3, nud-2 - protein nud-2, unc-104 - protein unc-104, ehs-1 - protein ehs-1, klc-2 - protein klc-2, rab-3 - protein rab-3, snb-1 - protein snb-1, unc-11 - protein unc-11, jnk-1 - protein jnk-1, rbf-1 - protein rbf-1, aex-6 - protein aex-6, sad-1 - protein sad-1, pkc-1 - protein pkc-…
GO:0060281	regulation of oocyte development	3.05e-05	0.000744	10.55	7788	9	492	6	[pde-6 - protein pde-6, gsa-1 - protein gsa-1, kin-1 - protein kin-1, ceh-18 - protein ceh-18, gck-1 - protein gck-1, kin-2 - protein kin-2]
GO:0009792	embryo development ending in birth or egg hatching	3.09e-05	0.00075	1.09	7788	2208	3878	1193	[CELE_C47E8.6 - protein c47e8.6, fzo-1 - protein fzo-1, pri-1 - protein pri-1, sdha-1 - protein sdha-1, hcp-3 - protein hcp-3, tbg-1 - protein tbg-1, rpl-7 - protein rpl-7, T10G3.1 - protein t10g3.1, nhr-86 - protein nhr-86, gei-13 - protein gei-13, C07A9.2 - protein c07a9.2, dars-1 - protein dars-1, B0464.2 - protein b0464.2, ifb-2 - protein ifb-2, vha-14 - protein vha-14, ifb-1 - protein ifb-1,…
GO:0018105	peptidyl-serine phosphorylation	3.27e-05	0.00079	6.19	7788	80	173	11	[csnk-1 - protein csnk-1, par-1 - protein par-1, nipi-3 - protein nipi-3, K08F8.1 - protein k08f8.1, mnk-1 - protein mnk-1, mbk-2 - protein mbk-2, pkg-1 - protein pkg-1, aak-2 - protein aak-2, kin-20 - protein kin-20, rskn-2 - protein rskn-2, unc-43 - protein unc-43]
GO:0018209	peptidyl-serine modification	3.27e-05	0.000785	6.19	7788	80	173	11	[csnk-1 - protein csnk-1, par-1 - protein par-1, nipi-3 - protein nipi-3, K08F8.1 - protein k08f8.1, mnk-1 - protein mnk-1, mbk-2 - protein mbk-2, pkg-1 - protein pkg-1, aak-2 - protein aak-2, kin-20 - protein kin-20, rskn-2 - protein rskn-2, unc-43 - protein unc-43]
GO:0048609	multicellular organismal reproductive process	3.37e-05	0.000805	2.32	7788	553	206	34	[dlg-1 - protein dlg-1, lin-42 - protein lin-42, mig-15 - protein mig-15, ulp-4 - protein ulp-4, pqn-47 - protein pqn-47, daf-12 - protein daf-12, gsa-1 - protein gsa-1, pdfr-1 - protein pdfr-1, egl-27 - protein egl-27, lev-11 - protein lev-11, tra-1 - protein tra-1, unc-62 - protein unc-62, lin-59 - protein lin-59, kin-1 - protein kin-1, hbl-1 - protein hbl-1, egl-19 - protein egl-19, H19M22.3 -…
GO:0009987	cellular process	3.38e-05	0.000803	1.17	7788	4122	630	390	[nhr-14 - protein nhr-14, hlh-11 - protein hlh-11, C07A9.2 - protein c07a9.2, lpin-1 - protein lpin-1, K05F1.6 - protein k05f1.6, CELE_Y18D10A.3 - protein y18d10a.3, sptf-3 - protein sptf-3, pam-1 - protein pam-1, glna-1 - protein glna-1, unc-82 - protein unc-82, abts-3 - protein abts-3, C48A7.2 - protein c48a7.2, vem-1 - protein vem-1, egl-19 - protein egl-19, spk-1 - protein spk-1, F42C5.9 - pr…
GO:0007268	synaptic transmission	3.47e-05	0.00082	2.55	7788	62	1279	26	[dhc-1 - protein dhc-1, dlg-1 - protein dlg-1, dgk-1 - protein dgk-1, ace-2 - protein ace-2, nud-2 - protein nud-2, unc-38 - protein unc-38, ehs-1 - protein ehs-1, dbl-1 - protein dbl-1, sek-1 - protein sek-1, rab-3 - protein rab-3, abts-1 - protein abts-1, irx-1 - protein irx-1, cab-1 - protein cab-1, unc-43 - protein unc-43, eat-6 - protein eat-6, ric-3 - protein ric-3, ccb-1 - protein ccb-1, g…
GO:0055082	cellular chemical homeostasis	3.49e-05	0.00082	3.54	7788	35	1007	16	[abts-3 - protein abts-3, aco-1 - protein aco-1, Y45F10D.4 - protein y45f10d.4, rab-14 - protein rab-14, mca-3 - protein mca-3, vha-7 - protein vha-7, vha-5 - protein vha-5, abts-1 - protein abts-1, unc-68 - protein unc-68, H25P06.1 - protein h25p06.1, pdfr-1 - protein pdfr-1, unc-32 - protein unc-32, sca-1 - protein sca-1, aqp-7 - protein aqp-7, F14B4.2 - protein f14b4.2, unc-108 - protein unc-1…
GO:0016070	RNA metabolic process	3.64e-05	0.00085	4.63	7788	721	28	12	[lin-14 - protein lin-14, jun-1 - protein jun-1, daf-12 - protein daf-12, hbl-1 - protein hbl-1, lin-42 - protein lin-42, nhr-14 - protein nhr-14, nhr-40 - protein nhr-40, fkh-7 - protein fkh-7, hlh-30 - protein hlh-30, fkh-9 - protein fkh-9, tag-97 - protein tag-97, daf-16 - protein daf-16]
GO:0051641	cellular localization	3.66e-05	0.000849	1.34	7788	196	3620	122	[npp-3 - protein npp-3, dlg-1 - protein dlg-1, ubc-12 - protein ubc-12, skr-2 - protein skr-2, ehs-1 - protein ehs-1, klc-2 - protein klc-2, lin-2 - protein lin-2, lpin-1 - protein lpin-1, rab-3 - protein rab-3, vps-41 - protein vps-41, ima-3 - protein ima-3, lin-5 - protein lin-5, CELE_Y57G11C.22 - protein y57g11c.22, ZK930.1 - protein zk930.1, ima-1 - protein ima-1, mtx-1 - protein mtx-1, memb-…
GO:0007271	synaptic transmission, cholinergic	3.84e-05	0.000887	3.65	7788	24	1246	14	[ric-3 - protein ric-3, dgk-1 - protein dgk-1, gar-2 - protein gar-2, ric-4 - protein ric-4, unc-10 - protein unc-10, ace-2 - protein ace-2, unc-38 - protein unc-38, unc-104 - protein unc-104, rab-3 - protein rab-3, snb-1 - protein snb-1, abts-1 - protein abts-1, unc-32 - protein unc-32, goa-1 - protein goa-1, eat-6 - protein eat-6]
GO:0071840	cellular component organization or biogenesis	3.87e-05	0.00089	1.62	7788	1036	395	85	[pptr-1 - protein pptr-1, dlg-1 - protein dlg-1, mig-15 - protein mig-15, F47F2.1 - protein f47f2.1, ngp-1 - protein ngp-1, klp-3 - protein klp-3, hlh-11 - protein hlh-11, anc-1 - protein anc-1, btbd-10 - protein btbd-10, unc-15 - protein unc-15, klc-2 - protein klc-2, blmp-1 - protein blmp-1, dbl-1 - protein dbl-1, lpin-1 - protein lpin-1, dyc-1 - protein dyc-1, jph-1 - protein jph-1, sgn-1 - pr…
GO:0009790	embryo development	3.88e-05	0.000888	1.08	7788	2218	3878	1197	[CELE_C47E8.6 - protein c47e8.6, fzo-1 - protein fzo-1, pri-1 - protein pri-1, hcp-3 - protein hcp-3, sdha-1 - protein sdha-1, tbg-1 - protein tbg-1, rpl-7 - protein rpl-7, T10G3.1 - protein t10g3.1, nhr-86 - protein nhr-86, gei-13 - protein gei-13, C07A9.2 - protein c07a9.2, dars-1 - protein dars-1, B0464.2 - protein b0464.2, ifb-2 - protein ifb-2, vha-14 - protein vha-14, ifb-1 - protein ifb-1,…
GO:0008286	insulin receptor signaling pathway	4.12e-05	0.000938	14.71	7788	8	331	5	[akt-2 - protein akt-2, daf-2 - protein daf-2, akt-1 - protein akt-1, pkg-1 - protein pkg-1, daf-16 - protein daf-16]
GO:0032793	positive regulation of CREB transcription factor activity	4.13e-05	0.000933	36.06	7788	3	216	3	[ckk-1 - protein ckk-1, crtc-1 - protein crtc-1, cmk-1 - protein cmk-1]
GO:0051091	positive regulation of sequence-specific DNA binding transcription factor activity	4.13e-05	0.000928	36.06	7788	3	216	3	[ckk-1 - protein ckk-1, crtc-1 - protein crtc-1, cmk-1 - protein cmk-1]
GO:0007178	transmembrane receptor protein serine/threonine kinase signaling pathway	4.14e-05	0.000927	3.79	7788	21	1271	13	[mab-31 - protein mab-31, obr-3 - protein obr-3, daf-1 - protein daf-1, D1053.4 - protein d1053.4, dbl-1 - protein dbl-1, daf-4 - protein daf-4, C08G9.1 - protein c08g9.1, kin-29 - protein kin-29, sma-9 - protein sma-9, tig-2 - protein tig-2, sma-2 - protein sma-2, sma-10 - protein sma-10, sma-3 - protein sma-3]
GO:0010646	regulation of cell communication	4.48e-05	0.000997	1.81	7788	232	1021	55	[Y32H12A.4 - protein y32h12a.4, lip-1 - protein lip-1, pptr-1 - protein pptr-1, egl-30 - protein egl-30, mig-15 - protein mig-15, egl-10 - protein egl-10, nsy-4 - protein nsy-4, pde-4 - protein pde-4, tig-3 - protein tig-3, dbl-1 - protein dbl-1, abts-1 - protein abts-1, sur-7 - protein sur-7, unc-43 - protein unc-43, grk-1 - protein grk-1, unc-10 - protein unc-10, let-607 - protein let-607, crml…
GO:0044699	single-organism process	4.57e-05	0.00101	1.04	7788	4983	3613	2409	[dpy-6 - protein dpy-6, C48B4.1 - protein c48b4.1, nhr-14 - protein nhr-14, pri-1 - protein pri-1, sdha-1 - protein sdha-1, hcp-3 - protein hcp-3, tbg-1 - protein tbg-1, rpl-7 - protein rpl-7, ubc-7 - protein ubc-7, gei-13 - protein gei-13, ugt-60 - protein ugt-60, C07A9.2 - protein c07a9.2, dars-1 - protein dars-1, ugt-32 - protein ugt-32, sod-4 - protein sod-4, B0464.2 - protein b0464.2, asns-2…
GO:1900195	positive regulation of oocyte maturation	4.64e-05	0.00102	204.95	7788	2	38	2	[gsa-1 - protein gsa-1, kin-1 - protein kin-1]
GO:1903431	positive regulation of cell maturation	4.64e-05	0.00102	204.95	7788	2	38	2	[kin-1 - protein kin-1, gsa-1 - protein gsa-1]
GO:0060282	positive regulation of oocyte development	4.64e-05	0.00101	204.95	7788	2	38	2	[kin-1 - protein kin-1, gsa-1 - protein gsa-1]
GO:0006732	coenzyme metabolic process	5e-05	0.00109	1.48	7788	85	4025	65	[enol-1 - protein enol-1, gspd-1 - protein gspd-1, coq-1 - protein coq-1, pnk-1 - protein pnk-1, Y53G8AL.2 - protein y53g8al.2, CELE_Y18D10A.3 - protein y18d10a.3, mthf-1 - protein mthf-1, CELE_Y57G11C.3 - protein y57g11c.3, clk-1 - protein clk-1, dlat-1 - protein dlat-1, C44B7.10 - protein c44b7.10, dao-3 - protein dao-3, M01F1.3 - protein m01f1.3, C28H8.11 - protein c28h8.11, moc-2 - protein mo…
GO:0010171	body morphogenesis	5.18e-05	0.00112	1.77	7788	501	544	62	[dpy-3 - protein dpy-3, col-17 - protein col-17, lin-42 - protein lin-42, mig-15 - protein mig-15, egl-10 - protein egl-10, dpy-4 - protein dpy-4, dpy-10 - protein dpy-10, unc-15 - protein unc-15, gei-13 - protein gei-13, dpy-5 - protein dpy-5, blmp-1 - protein blmp-1, F27C1.2 - protein f27c1.2, C02B10.5 - protein c02b10.5, nhr-23 - protein nhr-23, vab-10 - protein vab-10, egl-27 - protein egl-27…
GO:0071822	protein complex subunit organization	5.58e-05	0.0012	1.54	7788	308	1479	90	[tba-4 - protein tba-4, dhc-1 - protein dhc-1, cls-1 - protein cls-1, mspn-1 - protein mspn-1, F47F2.1 - protein f47f2.1, hcp-3 - protein hcp-3, btbd-10 - protein btbd-10, unc-15 - protein unc-15, glb-18 - protein glb-18, snap-1 - protein snap-1, nuo-1 - protein nuo-1, lpin-1 - protein lpin-1, tom-1 - protein tom-1, eps-8 - protein eps-8, vab-10 - protein vab-10, hlh-1 - protein hlh-1, fln-1 - pr…
GO:0023051	regulation of signaling	5.9e-05	0.00126	1.81	7788	223	1021	53	[Y32H12A.4 - protein y32h12a.4, lip-1 - protein lip-1, pptr-1 - protein pptr-1, mig-15 - protein mig-15, egl-30 - protein egl-30, egl-10 - protein egl-10, nsy-4 - protein nsy-4, pde-4 - protein pde-4, tig-3 - protein tig-3, dbl-1 - protein dbl-1, abts-1 - protein abts-1, sur-7 - protein sur-7, unc-43 - protein unc-43, grk-1 - protein grk-1, unc-10 - protein unc-10, let-607 - protein let-607, crml…
GO:0043933	macromolecular complex subunit organization	6.09e-05	0.0013	1.99	7788	434	406	45	[pptr-1 - protein pptr-1, unc-23 - protein unc-23, F47F2.1 - protein f47f2.1, rga-5 - protein rga-5, ric-7 - protein ric-7, rme-1 - protein rme-1, btbd-10 - protein btbd-10, unc-15 - protein unc-15, unc-87 - protein unc-87, unc-94 - protein unc-94, lpin-1 - protein lpin-1, vab-10 - protein vab-10, eps-8 - protein eps-8, fln-1 - protein fln-1, pfn-2 - protein pfn-2, tmd-2 - protein tmd-2, lev-11 -…
GO:0006941	striated muscle contraction	6.15e-05	0.0013	6.19	7788	21	539	9	[ccb-1 - protein ccb-1, ztf-19 - protein ztf-19, egl-19 - protein egl-19, myo-3 - protein myo-3, pat-12 - protein pat-12, etr-1 - protein etr-1, lev-11 - protein lev-11, pat-2 - protein pat-2, unc-112 - protein unc-112]
GO:0061199	striated muscle contraction involved in embryonic body morphogenesis	6.15e-05	0.00129	6.19	7788	21	539	9	[ccb-1 - protein ccb-1, ztf-19 - protein ztf-19, egl-19 - protein egl-19, myo-3 - protein myo-3, pat-12 - protein pat-12, etr-1 - protein etr-1, lev-11 - protein lev-11, pat-2 - protein pat-2, unc-112 - protein unc-112]
GO:0010605	negative regulation of macromolecule metabolic process	6.75e-05	0.00141	7.34	7788	283	30	8	[lin-14 - protein lin-14, daf-5 - protein daf-5, jun-1 - protein jun-1, hbl-1 - protein hbl-1, lin-42 - protein lin-42, tra-1 - protein tra-1, vhp-1 - protein vhp-1, daf-16 - protein daf-16]
GO:0044238	primary metabolic process	6.94e-05	0.00145	1.51	7788	2582	170	85	[Y48E1A.1 - protein y48e1a.1, ife-3 - protein ife-3, dlg-1 - protein dlg-1, nhr-14 - protein nhr-14, lin-42 - protein lin-42, mig-15 - protein mig-15, nhr-3 - protein nhr-3, fkh-9 - protein fkh-9, pde-4 - protein pde-4, R12B2.6 - protein r12b2.6, mvk-1 - protein mvk-1, lpin-1 - protein lpin-1, daf-12 - protein daf-12, sma-5 - protein sma-5, ZK370.4 - protein zk370.4, pkg-2 - protein pkg-2, vab-10…
GO:0044763	single-organism cellular process	7.33e-05	0.00152	1.14	7788	2928	1523	650	[nrde-4 - protein nrde-4, hcp-3 - protein hcp-3, ehs-1 - protein ehs-1, C07A9.2 - protein c07a9.2, cec-5 - protein cec-5, atgp-2 - protein atgp-2, lpin-1 - protein lpin-1, rab-3 - protein rab-3, cyp-33C5 - protein cyp-33c5, sod-4 - protein sod-4, F58G11.2 - protein f58g11.2, K05F1.6 - protein k05f1.6, CELE_Y18D10A.3 - protein y18d10a.3, sptf-3 - protein sptf-3, irx-1 - protein irx-1, R05G6.7 - pr…
GO:2000241	regulation of reproductive process	7.34e-05	0.00152	4.51	7788	55	408	13	[kin-1 - protein kin-1, dgk-1 - protein dgk-1, egl-30 - protein egl-30, egl-10 - protein egl-10, ceh-18 - protein ceh-18, pkg-1 - protein pkg-1, dyc-1 - protein dyc-1, gsa-1 - protein gsa-1, pde-6 - protein pde-6, gpb-1 - protein gpb-1, scpl-1 - protein scpl-1, eat-16 - protein eat-16, kin-2 - protein kin-2]
GO:0006629	lipid metabolic process	7.44e-05	0.00153	1.25	7788	254	4119	168	[C48B4.1 - protein c48b4.1, T20D3.8 - protein t20d3.8, hpo-4 - protein hpo-4, coq-1 - protein coq-1, ttx-7 - protein ttx-7, klf-3 - protein klf-3, F37C12.3 - protein f37c12.3, CELE_Y54E10BR.1 - protein y54e10br.1, lpin-1 - protein lpin-1, elo-1 - protein elo-1, CELE_F38E1.9 - protein f38e1.9, plc-4 - protein plc-4, psd-1 - protein psd-1, inos-1 - protein inos-1, elo-7 - protein elo-7, ZK669.4 - p…
GO:0072521	purine-containing compound metabolic process	7.78e-05	0.00159	1.4	7788	110	4143	82	[CELE_T04A8.5 - protein t04a8.5, enol-1 - protein enol-1, asg-2 - protein asg-2, asb-1 - protein asb-1, pnk-1 - protein pnk-1, pde-4 - protein pde-4, atp-3 - protein atp-3, R53.4 - protein r53.4, vha-12 - protein vha-12, Y82E9BR.3 - protein y82e9br.3, gcy-35 - protein gcy-35, clk-1 - protein clk-1, F38B6.4 - protein f38b6.4, ndk-1 - protein ndk-1, B0228.7 - protein b0228.7, vha-10 - protein vha-1…
GO:0044271	cellular nitrogen compound biosynthetic process	7.89e-05	0.00161	4.29	7788	778	28	12	[lin-14 - protein lin-14, jun-1 - protein jun-1, daf-12 - protein daf-12, lin-42 - protein lin-42, hbl-1 - protein hbl-1, nhr-14 - protein nhr-14, fkh-7 - protein fkh-7, hlh-30 - protein hlh-30, nhr-40 - protein nhr-40, fkh-9 - protein fkh-9, tag-97 - protein tag-97, daf-16 - protein daf-16]
GO:0010629	negative regulation of gene expression	8.12e-05	0.00164	8.65	7788	210	30	7	[lin-14 - protein lin-14, daf-5 - protein daf-5, jun-1 - protein jun-1, hbl-1 - protein hbl-1, lin-42 - protein lin-42, tra-1 - protein tra-1, daf-16 - protein daf-16]
GO:0034622	cellular macromolecular complex assembly	8.19e-05	0.00165	1.25	7788	220	4288	152	[F52A8.1 - protein f52a8.1, pptr-1 - protein pptr-1, eif-3.B - protein eif-3.b, hcp-3 - protein hcp-3, tbg-1 - protein tbg-1, B0035.15 - protein b0035.15, unc-15 - protein unc-15, glb-18 - protein glb-18, tom-1 - protein tom-1, vab-10 - protein vab-10, T20H4.5 - protein t20h4.5, smn-1 - protein smn-1, unc-96 - protein unc-96, unc-82 - protein unc-82, C02F5.7 - protein c02f5.7, CELE_R119.3 - prote…
GO:0032535	regulation of cellular component size	8.9e-05	0.00179	5.69	7788	35	391	10	[unc-94 - protein unc-94, eps-8 - protein eps-8, tmd-2 - protein tmd-2, unc-60 - protein unc-60, lev-11 - protein lev-11, let-607 - protein let-607, aqp-7 - protein aqp-7, unc-73 - protein unc-73, adt-2 - protein adt-2, dbl-1 - protein dbl-1]
GO:0044260	cellular macromolecule metabolic process	9.24e-05	0.00185	2.64	7788	1687	35	20	[jun-1 - protein jun-1, kin-1 - protein kin-1, lin-42 - protein lin-42, nhr-14 - protein nhr-14, hbl-1 - protein hbl-1, mig-15 - protein mig-15, nhr-40 - protein nhr-40, hlh-30 - protein hlh-30, fkh-9 - protein fkh-9, mnk-1 - protein mnk-1, lin-14 - protein lin-14, daf-12 - protein daf-12, pkg-2 - protein pkg-2, ppfr-1 - protein ppfr-1, tax-6 - protein tax-6, fkh-7 - protein fkh-7, H18N23.2 - pro…
GO:0009892	negative regulation of metabolic process	0.000101	0.00201	7.02	7788	296	30	8	[lin-14 - protein lin-14, daf-5 - protein daf-5, jun-1 - protein jun-1, hbl-1 - protein hbl-1, lin-42 - protein lin-42, tra-1 - protein tra-1, vhp-1 - protein vhp-1, daf-16 - protein daf-16]
GO:0043170	macromolecule metabolic process	0.000103	0.00203	1.7	7788	2051	125	56	[Y48E1A.1 - protein y48e1a.1, ife-3 - protein ife-3, nhr-14 - protein nhr-14, lin-42 - protein lin-42, mig-15 - protein mig-15, nhr-3 - protein nhr-3, fkh-9 - protein fkh-9, R12B2.6 - protein r12b2.6, daf-12 - protein daf-12, pkg-2 - protein pkg-2, sma-5 - protein sma-5, vab-10 - protein vab-10, unc-43 - protein unc-43, unc-82 - protein unc-82, unc-62 - protein unc-62, hbl-1 - protein hbl-1, nhr-…
GO:0043900	regulation of multi-organism process	0.000109	0.00215	4.35	7788	57	408	13	[kin-1 - protein kin-1, dgk-1 - protein dgk-1, egl-30 - protein egl-30, egl-10 - protein egl-10, ceh-18 - protein ceh-18, pkg-1 - protein pkg-1, dyc-1 - protein dyc-1, gsa-1 - protein gsa-1, pde-6 - protein pde-6, gpb-1 - protein gpb-1, scpl-1 - protein scpl-1, eat-16 - protein eat-16, kin-2 - protein kin-2]
GO:1900193	regulation of oocyte maturation	0.000112	0.00219	11.93	7788	8	408	5	[kin-1 - protein kin-1, gsa-1 - protein gsa-1, pde-6 - protein pde-6, ceh-18 - protein ceh-18, kin-2 - protein kin-2]
GO:1903429	regulation of cell maturation	0.000112	0.00218	11.93	7788	8	408	5	[pde-6 - protein pde-6, gsa-1 - protein gsa-1, kin-1 - protein kin-1, ceh-18 - protein ceh-18, kin-2 - protein kin-2]
GO:0051649	establishment of localization in cell	0.000113	0.0022	1.3	7788	368	2732	168	[npp-3 - protein npp-3, vps-37 - protein vps-37, ubc-12 - protein ubc-12, ral-1 - protein ral-1, ehs-1 - protein ehs-1, atp-3 - protein atp-3, klc-2 - protein klc-2, apt-9 - protein apt-9, snap-1 - protein snap-1, paa-1 - protein paa-1, rab-3 - protein rab-3, dif-1 - protein dif-1, lpin-1 - protein lpin-1, vps-41 - protein vps-41, ima-3 - protein ima-3, arl-3 - protein arl-3, vab-10 - protein vab…
GO:0006518	peptide metabolic process	0.000114	0.00221	1.33	7788	177	3666	111	[rpl-9 - protein rpl-9, W01D2.1 - protein w01d2.1, rpl-19 - protein rpl-19, qars-1 - protein qars-1, rps-14 - protein rps-14, eif-1.A - protein eif-1.a, rpl-36 - protein rpl-36, T23F2.2 - protein t23f2.2, rps-21 - protein rps-21, dars-1 - protein dars-1, rps-18 - protein rps-18, ears-2 - protein ears-2, rpl-6 - protein rpl-6, pam-1 - protein pam-1, mrpl-17 - protein mrpl-17, mrpl-9 - protein mrpl…
GO:0030004	cellular monovalent inorganic cation homeostasis	0.000115	0.00222	8.9	7788	10	525	6	[vha-5 - protein vha-5, abts-3 - protein abts-3, abts-1 - protein abts-1, rab-14 - protein rab-14, vha-7 - protein vha-7, unc-108 - protein unc-108]
GO:0030641	regulation of cellular pH	0.000115	0.00221	8.9	7788	10	525	6	[abts-3 - protein abts-3, vha-5 - protein vha-5, abts-1 - protein abts-1, rab-14 - protein rab-14, unc-108 - protein unc-108, vha-7 - protein vha-7]
GO:0051453	regulation of intracellular pH	0.000115	0.0022	8.9	7788	10	525	6	[vha-5 - protein vha-5, abts-3 - protein abts-3, abts-1 - protein abts-1, rab-14 - protein rab-14, vha-7 - protein vha-7, unc-108 - protein unc-108]
GO:0032787	monocarboxylic acid metabolic process	0.000125	0.00237	1.61	7788	117	2561	62	[ugt-33 - protein ugt-33, enol-1 - protein enol-1, ugt-60 - protein ugt-60, ugt-2 - protein ugt-2, lpin-1 - protein lpin-1, ugt-49 - protein ugt-49, elo-1 - protein elo-1, paqr-1 - protein paqr-1, dlat-1 - protein dlat-1, ugt-34 - protein ugt-34, ZK669.4 - protein zk669.4, M01F1.3 - protein m01f1.3, sur-5 - protein sur-5, ugt-26 - protein ugt-26, ugt-54 - protein ugt-54, CELE_T28F3.5 - protein t2…
GO:0019915	lipid storage	0.000128	0.00242	1.93	7788	383	475	45	[prl-1 - protein prl-1, T14B1.1 - protein t14b1.1, mig-15 - protein mig-15, ogt-1 - protein ogt-1, rga-5 - protein rga-5, T04C9.2 - protein t04c9.2, ttr-48 - protein ttr-48, swt-1 - protein swt-1, dhs-28 - protein dhs-28, klf-3 - protein klf-3, lbp-9 - protein lbp-9, ire-1 - protein ire-1, nhr-66 - protein nhr-66, peb-1 - protein peb-1, lpin-1 - protein lpin-1, daf-12 - protein daf-12, T27E4.7 - …
GO:0048878	chemical homeostasis	0.000129	0.00243	2.7	7788	63	1007	22	[abts-3 - protein abts-3, aco-1 - protein aco-1, mboa-1 - protein mboa-1, rab-14 - protein rab-14, nhx-1 - protein nhx-1, Y45F10D.4 - protein y45f10d.4, mca-3 - protein mca-3, vha-7 - protein vha-7, vha-5 - protein vha-5, H25P06.1 - protein h25p06.1, abts-1 - protein abts-1, unc-68 - protein unc-68, nhr-8 - protein nhr-8, pdfr-1 - protein pdfr-1, unc-32 - protein unc-32, sca-1 - protein sca-1, nc…
GO:0006873	cellular ion homeostasis	0.000129	0.00242	3.72	7788	27	1007	13	[abts-3 - protein abts-3, aco-1 - protein aco-1, Y45F10D.4 - protein y45f10d.4, rab-14 - protein rab-14, mca-3 - protein mca-3, vha-7 - protein vha-7, vha-5 - protein vha-5, abts-1 - protein abts-1, unc-68 - protein unc-68, pdfr-1 - protein pdfr-1, unc-32 - protein unc-32, sca-1 - protein sca-1, unc-108 - protein unc-108]
GO:0030003	cellular cation homeostasis	0.000129	0.00241	3.72	7788	27	1007	13	[abts-3 - protein abts-3, aco-1 - protein aco-1, Y45F10D.4 - protein y45f10d.4, rab-14 - protein rab-14, mca-3 - protein mca-3, vha-7 - protein vha-7, vha-5 - protein vha-5, unc-68 - protein unc-68, abts-1 - protein abts-1, pdfr-1 - protein pdfr-1, sca-1 - protein sca-1, unc-32 - protein unc-32, unc-108 - protein unc-108]
GO:0051235	maintenance of location	0.000131	0.00243	1.91	7788	395	475	46	[prl-1 - protein prl-1, T14B1.1 - protein t14b1.1, ogt-1 - protein ogt-1, mig-15 - protein mig-15, ttr-48 - protein ttr-48, T04C9.2 - protein t04c9.2, rga-5 - protein rga-5, dhs-28 - protein dhs-28, klf-3 - protein klf-3, swt-1 - protein swt-1, lbp-9 - protein lbp-9, nhr-66 - protein nhr-66, ire-1 - protein ire-1, peb-1 - protein peb-1, lpin-1 - protein lpin-1, daf-12 - protein daf-12, T27E4.7 - …
GO:0007275	multicellular organismal development	0.000137	0.00254	2.05	7788	316	456	38	[lin-42 - protein lin-42, ceh-18 - protein ceh-18, akt-2 - protein akt-2, blmp-1 - protein blmp-1, pan-1 - protein pan-1, skn-1 - protein skn-1, pdk-1 - protein pdk-1, egl-27 - protein egl-27, tra-1 - protein tra-1, gld-2 - protein gld-2, lit-1 - protein lit-1, kin-20 - protein kin-20, daf-16 - protein daf-16, unc-62 - protein unc-62, mab-3 - protein mab-3, mig-6 - protein mig-6, hbl-1 - protein …
GO:0006633	fatty acid biosynthetic process	0.000141	0.00259	2.74	7788	32	1597	18	[elo-6 - protein elo-6, M01F1.3 - protein m01f1.3, elo-3 - protein elo-3, CELE_C25A1.5 - protein c25a1.5, ZC416.6 - protein zc416.6, CELE_T28F3.5 - protein t28f3.5, mecr-1 - protein mecr-1, fat-5 - protein fat-5, dld-1 - protein dld-1, F49E12.9 - protein f49e12.9, agmo-1 - protein agmo-1, elo-1 - protein elo-1, fat-6 - protein fat-6, fat-2 - protein fat-2, fat-3 - protein fat-3, fat-1 - protein f…
GO:0016052	carbohydrate catabolic process	0.000154	0.00282	2.11	7788	31	2735	23	[gpd-3 - protein gpd-3, enol-1 - protein enol-1, T25G3.4 - protein t25g3.4, pyk-1 - protein pyk-1, pyk-2 - protein pyk-2, pgk-1 - protein pgk-1, R05F9.6 - protein r05f9.6, tpi-1 - protein tpi-1, dhs-21 - protein dhs-21, aldo-1 - protein aldo-1, Y77E11A.1 - protein y77e11a.1, CELE_C33A12.3 - protein c33a12.3, aagr-2 - protein aagr-2, aldo-2 - protein aldo-2, R11F4.1 - protein r11f4.1, H25P06.1 - p…
GO:0030833	regulation of actin filament polymerization	0.000175	0.0032	14.78	7788	17	155	5	[unc-94 - protein unc-94, eps-8 - protein eps-8, unc-60 - protein unc-60, lev-11 - protein lev-11, unc-73 - protein unc-73]
GO:0009966	regulation of signal transduction	0.000181	0.00329	1.91	7788	184	909	41	[Y32H12A.4 - protein y32h12a.4, pptr-1 - protein pptr-1, lip-1 - protein lip-1, mig-15 - protein mig-15, egl-10 - protein egl-10, gck-1 - protein gck-1, nsy-4 - protein nsy-4, gei-4 - protein gei-4, pde-4 - protein pde-4, tig-3 - protein tig-3, ire-1 - protein ire-1, exc-5 - protein exc-5, let-765 - protein let-765, dbl-1 - protein dbl-1, gsa-1 - protein gsa-1, osm-11 - protein osm-11, tig-2 - pr…
GO:1902531	regulation of intracellular signal transduction	0.0002	0.00362	2.37	7788	103	895	28	[lip-1 - protein lip-1, mig-15 - protein mig-15, gck-1 - protein gck-1, nsy-4 - protein nsy-4, gei-4 - protein gei-4, pde-4 - protein pde-4, tig-3 - protein tig-3, exc-5 - protein exc-5, ire-1 - protein ire-1, let-765 - protein let-765, dbl-1 - protein dbl-1, gsa-1 - protein gsa-1, tig-2 - protein tig-2, kin-2 - protein kin-2, vhp-1 - protein vhp-1, sur-7 - protein sur-7, soc-2 - protein soc-2, M…
GO:0051640	organelle localization	0.000205	0.0037	2.14	7788	120	1030	34	[cmd-1 - protein cmd-1, npp-3 - protein npp-3, ric-7 - protein ric-7, anc-1 - protein anc-1, nud-2 - protein nud-2, ehs-1 - protein ehs-1, gpc-2 - protein gpc-2, klc-2 - protein klc-2, lmn-1 - protein lmn-1, par-5 - protein par-5, npp-11 - protein npp-11, rab-3 - protein rab-3, jnk-1 - protein jnk-1, unc-11 - protein unc-11, pkc-1 - protein pkc-1, sax-7 - protein sax-7, sng-1 - protein sng-1, tbb…
GO:0019637	organophosphate metabolic process	0.000211	0.00378	1.25	7788	229	4067	150	[T20D3.8 - protein t20d3.8, gspd-1 - protein gspd-1, dlg-1 - protein dlg-1, hpo-4 - protein hpo-4, ttx-7 - protein ttx-7, pde-4 - protein pde-4, atp-3 - protein atp-3, R53.4 - protein r53.4, upp-1 - protein upp-1, CELE_Y54E10BR.1 - protein y54e10br.1, R151.2 - protein r151.2, CELE_Y18D10A.3 - protein y18d10a.3, CELE_Y57G11C.3 - protein y57g11c.3, clk-1 - protein clk-1, vha-10 - protein vha-10, R0…
GO:0000165	MAPK cascade	0.000214	0.00382	10.52	7788	24	185	6	[mig-15 - protein mig-15, nipi-3 - protein nipi-3, pkc-1 - protein pkc-1, K08F8.1 - protein k08f8.1, lit-1 - protein lit-1, unc-43 - protein unc-43]
GO:0030163	protein catabolic process	0.000222	0.00395	2.01	7788	193	723	36	[lin-23 - protein lin-23, unc-23 - protein unc-23, egl-30 - protein egl-30, mpk-1 - protein mpk-1, klf-3 - protein klf-3, dpy-10 - protein dpy-10, chc-1 - protein chc-1, unc-87 - protein unc-87, asp-1 - protein asp-1, unc-94 - protein unc-94, vab-10 - protein vab-10, egl-27 - protein egl-27, exp-2 - protein exp-2, unc-9 - protein unc-9, unc-60 - protein unc-60, unc-36 - protein unc-36, eat-6 - pr…
GO:0051090	regulation of sequence-specific DNA binding transcription factor activity	0.000233	0.00413	27.04	7788	4	216	3	[ckk-1 - protein ckk-1, crtc-1 - protein crtc-1, cmk-1 - protein cmk-1]
GO:0090304	nucleic acid metabolic process	0.000235	0.00415	3.89	7788	859	28	12	[lin-14 - protein lin-14, jun-1 - protein jun-1, daf-12 - protein daf-12, lin-42 - protein lin-42, hbl-1 - protein hbl-1, nhr-14 - protein nhr-14, fkh-7 - protein fkh-7, hlh-30 - protein hlh-30, nhr-40 - protein nhr-40, fkh-9 - protein fkh-9, tag-97 - protein tag-97, daf-16 - protein daf-16]
GO:0050795	regulation of behavior	0.000235	0.00414	2.2	7788	87	1218	30	[dgk-1 - protein dgk-1, egl-30 - protein egl-30, egl-10 - protein egl-10, unc-7 - protein unc-7, avr-14 - protein avr-14, unc-38 - protein unc-38, sek-1 - protein sek-1, dyc-1 - protein dyc-1, rab-3 - protein rab-3, daf-12 - protein daf-12, pdk-1 - protein pdk-1, T19D7.4 - protein t19d7.4, unc-108 - protein unc-108, egl-19 - protein egl-19, daf-1 - protein daf-1, cccp-1 - protein cccp-1, unc-10 -…
GO:0032271	regulation of protein polymerization	0.000241	0.00422	13.96	7788	18	155	5	[unc-94 - protein unc-94, eps-8 - protein eps-8, unc-60 - protein unc-60, lev-11 - protein lev-11, unc-73 - protein unc-73]
GO:0030832	regulation of actin filament length	0.000241	0.0042	13.96	7788	18	155	5	[unc-94 - protein unc-94, eps-8 - protein eps-8, unc-60 - protein unc-60, lev-11 - protein lev-11, unc-73 - protein unc-73]
GO:0008064	regulation of actin polymerization or depolymerization	0.000241	0.00418	13.96	7788	18	155	5	[unc-94 - protein unc-94, eps-8 - protein eps-8, lev-11 - protein lev-11, unc-60 - protein unc-60, unc-73 - protein unc-73]
GO:0048869	cellular developmental process	0.000251	0.00434	5.22	7788	559	24	9	[lin-14 - protein lin-14, lin-42 - protein lin-42, mig-15 - protein mig-15, apl-1 - protein apl-1, fkh-7 - protein fkh-7, fkh-9 - protein fkh-9, tag-97 - protein tag-97, tra-1 - protein tra-1, daf-16 - protein daf-16]
GO:0048489	synaptic vesicle transport	0.000267	0.00459	2.99	7788	27	1448	15	[dhc-1 - protein dhc-1, sng-1 - protein sng-1, lis-1 - protein lis-1, unc-116 - protein unc-116, snt-3 - protein snt-3, nud-2 - protein nud-2, unc-104 - protein unc-104, ehs-1 - protein ehs-1, klc-2 - protein klc-2, rab-3 - protein rab-3, snb-1 - protein snb-1, unc-11 - protein unc-11, rbf-1 - protein rbf-1, sad-1 - protein sad-1, pkc-1 - protein pkc-1]
GO:0097480	establishment of synaptic vesicle localization	0.000267	0.00458	2.99	7788	27	1448	15	[dhc-1 - protein dhc-1, sng-1 - protein sng-1, lis-1 - protein lis-1, unc-116 - protein unc-116, snt-3 - protein snt-3, nud-2 - protein nud-2, unc-104 - protein unc-104, ehs-1 - protein ehs-1, klc-2 - protein klc-2, rab-3 - protein rab-3, snb-1 - protein snb-1, unc-11 - protein unc-11, rbf-1 - protein rbf-1, sad-1 - protein sad-1, pkc-1 - protein pkc-1]
GO:0006139	nucleobase-containing compound metabolic process	0.000269	0.00459	3.5	7788	1034	28	13	[jun-1 - protein jun-1, nhr-14 - protein nhr-14, hbl-1 - protein hbl-1, lin-42 - protein lin-42, nhr-40 - protein nhr-40, hlh-30 - protein hlh-30, fkh-9 - protein fkh-9, pde-4 - protein pde-4, lin-14 - protein lin-14, daf-12 - protein daf-12, fkh-7 - protein fkh-7, tag-97 - protein tag-97, daf-16 - protein daf-16]
GO:0046058	cAMP metabolic process	0.000286	0.00487	18.86	7788	3	413	3	[acy-1 - protein acy-1, pde-4 - protein pde-4, acy-3 - protein acy-3]
GO:0010940	positive regulation of necrotic cell death	0.000358	0.00607	4.53	7788	11	1250	8	[unc-57 - protein unc-57, unc-11 - protein unc-11, unc-116 - protein unc-116, lgg-1 - protein lgg-1, rme-1 - protein rme-1, dyn-1 - protein dyn-1, unc-104 - protein unc-104, dpy-23 - protein dpy-23]
GO:0051656	establishment of organelle localization	0.000359	0.00607	2.14	7788	113	1030	32	[npp-3 - protein npp-3, cmd-1 - protein cmd-1, anc-1 - protein anc-1, nud-2 - protein nud-2, ehs-1 - protein ehs-1, gpc-2 - protein gpc-2, klc-2 - protein klc-2, lmn-1 - protein lmn-1, par-5 - protein par-5, npp-11 - protein npp-11, rab-3 - protein rab-3, jnk-1 - protein jnk-1, unc-11 - protein unc-11, pkc-1 - protein pkc-1, sax-7 - protein sax-7, sng-1 - protein sng-1, tbb-2 - protein tbb-2, zyg…
GO:0043067	regulation of programmed cell death	0.000371	0.00624	2.71	7788	88	685	21	[cmd-1 - protein cmd-1, mig-15 - protein mig-15, gck-1 - protein gck-1, dre-1 - protein dre-1, bir-1 - protein bir-1, pme-5 - protein pme-5, tig-3 - protein tig-3, ire-1 - protein ire-1, ape-1 - protein ape-1, dbl-1 - protein dbl-1, unc-68 - protein unc-68, T07F12.4 - protein t07f12.4, tig-2 - protein tig-2, sptf-3 - protein sptf-3, pdi-2 - protein pdi-2, CELE_Y47G6A.5 - protein y47g6a.5, tra-1 -…
GO:0009132	nucleoside diphosphate metabolic process	0.000378	0.00634	2.04	7788	32	2741	23	[gpd-3 - protein gpd-3, enol-1 - protein enol-1, R05G6.5 - protein r05g6.5, pyk-1 - protein pyk-1, pgk-1 - protein pgk-1, pyk-2 - protein pyk-2, tpi-1 - protein tpi-1, Y77E11A.1 - protein y77e11a.1, aldo-1 - protein aldo-1, F54C1.6 - protein f54c1.6, aldo-2 - protein aldo-2, let-754 - protein let-754, H25P06.1 - protein h25p06.1, gpi-1 - protein gpi-1, ogdh-1 - protein ogdh-1, ndk-1 - protein ndk…
GO:0016053	organic acid biosynthetic process	0.000379	0.00633	1.42	7788	80	4263	62	[T01H8.2 - protein t01h8.2, metr-1 - protein metr-1, alh-6 - protein alh-6, C42C1.11 - protein c42c1.11, F37C12.3 - protein f37c12.3, hpo-8 - protein hpo-8, unc-25 - protein unc-25, elo-1 - protein elo-1, asns-2 - protein asns-2, B0228.7 - protein b0228.7, M153.1 - protein m153.1, F55G1.9 - protein f55g1.9, dao-3 - protein dao-3, ZK669.4 - protein zk669.4, elo-7 - protein elo-7, M01F1.3 - protein…
GO:0046394	carboxylic acid biosynthetic process	0.000379	0.00631	1.42	7788	80	4263	62	[T01H8.2 - protein t01h8.2, metr-1 - protein metr-1, alh-6 - protein alh-6, C42C1.11 - protein c42c1.11, F37C12.3 - protein f37c12.3, hpo-8 - protein hpo-8, unc-25 - protein unc-25, elo-1 - protein elo-1, asns-2 - protein asns-2, M153.1 - protein m153.1, B0228.7 - protein b0228.7, F55G1.9 - protein f55g1.9, dao-3 - protein dao-3, elo-7 - protein elo-7, ZK669.4 - protein zk669.4, M01F1.3 - protein…
GO:0031032	actomyosin structure organization	0.000383	0.00635	4.5	7788	16	974	9	[unc-94 - protein unc-94, slo-1 - protein slo-1, unc-98 - protein unc-98, dyc-1 - protein dyc-1, cyk-4 - protein cyk-4, rga-5 - protein rga-5, tmd-2 - protein tmd-2, mup-2 - protein mup-2, unc-87 - protein unc-87]
GO:0006725	cellular aromatic compound metabolic process	0.000386	0.00638	3.38	7788	1069	28	13	[jun-1 - protein jun-1, nhr-14 - protein nhr-14, hbl-1 - protein hbl-1, lin-42 - protein lin-42, nhr-40 - protein nhr-40, hlh-30 - protein hlh-30, fkh-9 - protein fkh-9, pde-4 - protein pde-4, lin-14 - protein lin-14, daf-12 - protein daf-12, fkh-7 - protein fkh-7, tag-97 - protein tag-97, daf-16 - protein daf-16]
GO:0009179	purine ribonucleoside diphosphate metabolic process	0.000387	0.00636	1.84	7788	23	3875	21	[gpd-3 - protein gpd-3, ntp-1 - protein ntp-1, enol-1 - protein enol-1, pyk-1 - protein pyk-1, pyk-2 - protein pyk-2, pgk-1 - protein pgk-1, mig-23 - protein mig-23, tpi-1 - protein tpi-1, Y77E11A.1 - protein y77e11a.1, aldo-1 - protein aldo-1, aldo-2 - protein aldo-2, let-754 - protein let-754, apy-1 - protein apy-1, H25P06.1 - protein h25p06.1, gpi-1 - protein gpi-1, ogdh-1 - protein ogdh-1, F3…
GO:0009135	purine nucleoside diphosphate metabolic process	0.000387	0.00633	1.84	7788	23	3875	21	[gpd-3 - protein gpd-3, ntp-1 - protein ntp-1, enol-1 - protein enol-1, pyk-1 - protein pyk-1, pyk-2 - protein pyk-2, pgk-1 - protein pgk-1, mig-23 - protein mig-23, tpi-1 - protein tpi-1, Y77E11A.1 - protein y77e11a.1, aldo-1 - protein aldo-1, aldo-2 - protein aldo-2, let-754 - protein let-754, apy-1 - protein apy-1, H25P06.1 - protein h25p06.1, gpi-1 - protein gpi-1, ogdh-1 - protein ogdh-1, F3…
GO:0043053	dauer entry	0.000394	0.00643	6.38	7788	35	279	8	[daf-12 - protein daf-12, kin-29 - protein kin-29, nhr-85 - protein nhr-85, daf-2 - protein daf-2, tatn-1 - protein tatn-1, daf-16 - protein daf-16, par-5 - protein par-5, blmp-1 - protein blmp-1]
GO:0055115	entry into diapause	0.000394	0.00641	6.38	7788	35	279	8	[daf-12 - protein daf-12, kin-29 - protein kin-29, nhr-85 - protein nhr-85, daf-2 - protein daf-2, tatn-1 - protein tatn-1, daf-16 - protein daf-16, blmp-1 - protein blmp-1, par-5 - protein par-5]
GO:0003008	system process	0.000407	0.00659	3.07	7788	209	194	16	[egl-19 - protein egl-19, etr-1 - protein etr-1, unc-54 - protein unc-54, peb-1 - protein peb-1, casy-1 - protein casy-1, gsa-1 - protein gsa-1, jph-1 - protein jph-1, pat-12 - protein pat-12, sgn-1 - protein sgn-1, tax-6 - protein tax-6, gcy-28 - protein gcy-28, CELE_D2023.1 - protein d2023.1, lev-11 - protein lev-11, pkc-1 - protein pkc-1, unc-112 - protein unc-112, unc-43 - protein unc-43]
GO:0006631	fatty acid metabolic process	0.000407	0.00657	2.08	7788	51	1981	27	[elo-6 - protein elo-6, elo-3 - protein elo-3, lpin-1 - protein lpin-1, elo-1 - protein elo-1, paqr-1 - protein paqr-1, acs-2 - protein acs-2, ZK669.4 - protein zk669.4, M01F1.3 - protein m01f1.3, sur-5 - protein sur-5, CELE_C25A1.5 - protein c25a1.5, ZC416.6 - protein zc416.6, CELE_T28F3.5 - protein t28f3.5, mecr-1 - protein mecr-1, fat-5 - protein fat-5, dld-1 - protein dld-1, F49E12.9 - protei…
GO:0023014	signal transduction by protein phosphorylation	0.000419	0.00673	3.23	7788	32	1055	14	[daf-1 - protein daf-1, mig-15 - protein mig-15, mpk-1 - protein mpk-1, nipi-3 - protein nipi-3, K08F8.1 - protein k08f8.1, sek-1 - protein sek-1, jnk-1 - protein jnk-1, daf-4 - protein daf-4, T07F12.4 - protein t07f12.4, CELE_W09H1.1 - protein w09h1.1, mlk-1 - protein mlk-1, pkc-1 - protein pkc-1, unc-43 - protein unc-43, lit-1 - protein lit-1]
GO:1901135	carbohydrate derivative metabolic process	0.00042	0.00672	1.24	7788	227	4164	150	[T20D3.8 - protein t20d3.8, gspd-1 - protein gspd-1, hpo-4 - protein hpo-4, sqv-6 - protein sqv-6, ogt-1 - protein ogt-1, Y50D4B.7 - protein y50d4b.7, cdd-1 - protein cdd-1, CELE_W04G5.5 - protein w04g5.5, pde-4 - protein pde-4, atp-3 - protein atp-3, R53.4 - protein r53.4, upp-1 - protein upp-1, CELE_Y54E10BR.1 - protein y54e10br.1, CELE_T10D4.3 - protein t10d4.3, CELE_F38E1.9 - protein f38e1.9,…
GO:0046483	heterocycle metabolic process	0.000421	0.00671	3.36	7788	1077	28	13	[jun-1 - protein jun-1, nhr-14 - protein nhr-14, hbl-1 - protein hbl-1, lin-42 - protein lin-42, nhr-40 - protein nhr-40, hlh-30 - protein hlh-30, fkh-9 - protein fkh-9, pde-4 - protein pde-4, lin-14 - protein lin-14, daf-12 - protein daf-12, fkh-7 - protein fkh-7, tag-97 - protein tag-97, daf-16 - protein daf-16]
GO:0019725	cellular homeostasis	0.000431	0.00685	2.36	7788	78	1059	25	[CELE_C30H7.2 - protein c30h7.2, aco-1 - protein aco-1, Y45F10D.4 - protein y45f10d.4, mca-3 - protein mca-3, dyc-1 - protein dyc-1, abts-1 - protein abts-1, unc-68 - protein unc-68, pdfr-1 - protein pdfr-1, unc-70 - protein unc-70, F35G2.1 - protein f35g2.1, unc-108 - protein unc-108, abts-3 - protein abts-3, dnj-8 - protein dnj-8, F47B8.3 - protein f47b8.3, rab-14 - protein rab-14, gpdh-2 - pro…
GO:0042451	purine nucleoside biosynthetic process	0.000442	0.007	1.74	7788	46	3213	33	[R05G6.5 - protein r05g6.5, asg-2 - protein asg-2, atp-4 - protein atp-4, asb-1 - protein asb-1, pnk-1 - protein pnk-1, C06G3.5 - protein c06g3.5, F54C1.6 - protein f54c1.6, atp-3 - protein atp-3, asg-1 - protein asg-1, Y82E9BR.3 - protein y82e9br.3, ndk-1 - protein ndk-1, B0228.7 - protein b0228.7, vha-10 - protein vha-10, F38B2.4 - protein f38b2.4, R07H5.8 - protein r07h5.8, C37H5.6 - protein c…
GO:0046129	purine ribonucleoside biosynthetic process	0.000442	0.00698	1.74	7788	46	3213	33	[R05G6.5 - protein r05g6.5, atp-4 - protein atp-4, asg-2 - protein asg-2, asb-1 - protein asb-1, pnk-1 - protein pnk-1, C06G3.5 - protein c06g3.5, F54C1.6 - protein f54c1.6, atp-3 - protein atp-3, asg-1 - protein asg-1, Y82E9BR.3 - protein y82e9br.3, ndk-1 - protein ndk-1, B0228.7 - protein b0228.7, vha-10 - protein vha-10, F38B2.4 - protein f38b2.4, R07H5.8 - protein r07h5.8, C37H5.6 - protein c…
GO:0023052	signaling	0.000457	0.00719	2.19	7788	78	1279	28	[dhc-1 - protein dhc-1, dlg-1 - protein dlg-1, dgk-1 - protein dgk-1, daf-9 - protein daf-9, ace-2 - protein ace-2, CELE_W03A5.4 - protein w03a5.4, nud-2 - protein nud-2, unc-38 - protein unc-38, ehs-1 - protein ehs-1, dbl-1 - protein dbl-1, sek-1 - protein sek-1, rab-3 - protein rab-3, abts-1 - protein abts-1, cab-1 - protein cab-1, irx-1 - protein irx-1, unc-43 - protein unc-43, eat-6 - protein…
GO:0009185	ribonucleoside diphosphate metabolic process	0.000485	0.00759	2.16	7788	25	2741	19	[gpd-3 - protein gpd-3, enol-1 - protein enol-1, pyk-1 - protein pyk-1, pgk-1 - protein pgk-1, pyk-2 - protein pyk-2, tpi-1 - protein tpi-1, aldo-1 - protein aldo-1, Y77E11A.1 - protein y77e11a.1, aldo-2 - protein aldo-2, let-754 - protein let-754, H25P06.1 - protein h25p06.1, gpi-1 - protein gpi-1, ogdh-1 - protein ogdh-1, F38B2.4 - protein f38b2.4, F57B10.3 - protein f57b10.3, F40F8.1 - protein…
GO:0042981	regulation of apoptotic process	0.00052	0.00812	2.81	7788	77	685	19	[cmd-1 - protein cmd-1, mig-15 - protein mig-15, gck-1 - protein gck-1, dre-1 - protein dre-1, bir-1 - protein bir-1, tig-3 - protein tig-3, ire-1 - protein ire-1, ape-1 - protein ape-1, dbl-1 - protein dbl-1, T07F12.4 - protein t07f12.4, tig-2 - protein tig-2, sptf-3 - protein sptf-3, pdi-2 - protein pdi-2, CELE_Y47G6A.5 - protein y47g6a.5, tra-1 - protein tra-1, Y43C5B.2 - protein y43c5b.2, cgh…
GO:0031667	response to nutrient levels	0.000549	0.00853	3.27	7788	38	878	14	[lgg-2 - protein lgg-2, dgk-1 - protein dgk-1, nhr-40 - protein nhr-40, dhs-28 - protein dhs-28, chc-1 - protein chc-1, R12B2.6 - protein r12b2.6, aak-2 - protein aak-2, unc-70 - protein unc-70, sca-1 - protein sca-1, bec-1 - protein bec-1, eat-16 - protein eat-16, daf-2 - protein daf-2, fasn-1 - protein fasn-1, goa-1 - protein goa-1]
GO:1901360	organic cyclic compound metabolic process	0.000571	0.00885	3.26	7788	1108	28	13	[jun-1 - protein jun-1, nhr-14 - protein nhr-14, hbl-1 - protein hbl-1, lin-42 - protein lin-42, nhr-40 - protein nhr-40, hlh-30 - protein hlh-30, fkh-9 - protein fkh-9, pde-4 - protein pde-4, lin-14 - protein lin-14, daf-12 - protein daf-12, fkh-7 - protein fkh-7, tag-97 - protein tag-97, daf-16 - protein daf-16]
GO:1902589	single-organism organelle organization	0.000574	0.00886	1.75	7788	562	395	50	[pptr-1 - protein pptr-1, F47F2.1 - protein f47f2.1, klp-3 - protein klp-3, unc-15 - protein unc-15, klc-2 - protein klc-2, dyc-1 - protein dyc-1, lpin-1 - protein lpin-1, vab-10 - protein vab-10, eps-8 - protein eps-8, fln-1 - protein fln-1, tmd-2 - protein tmd-2, unc-43 - protein unc-43, unc-82 - protein unc-82, lin-59 - protein lin-59, zyg-11 - protein zyg-11, atx-2 - protein atx-2, nhr-40 - p…
GO:0009605	response to external stimulus	0.0006	0.00923	1.98	7788	143	1018	37	[lgg-2 - protein lgg-2, clec-52 - protein clec-52, dgk-1 - protein dgk-1, hsf-1 - protein hsf-1, C14C11.4 - protein c14c11.4, dhs-28 - protein dhs-28, chc-1 - protein chc-1, R12B2.6 - protein r12b2.6, sek-1 - protein sek-1, dbl-1 - protein dbl-1, jnk-1 - protein jnk-1, osm-11 - protein osm-11, unc-70 - protein unc-70, pqm-1 - protein pqm-1, bec-1 - protein bec-1, atf-7 - protein atf-7, fasn-1 - p…
GO:0006163	purine nucleotide metabolic process	0.000636	0.00975	1.39	7788	95	4143	70	[CELE_T04A8.5 - protein t04a8.5, enol-1 - protein enol-1, asg-2 - protein asg-2, asb-1 - protein asb-1, pnk-1 - protein pnk-1, pde-4 - protein pde-4, R53.4 - protein r53.4, atp-3 - protein atp-3, vha-12 - protein vha-12, Y82E9BR.3 - protein y82e9br.3, gcy-35 - protein gcy-35, clk-1 - protein clk-1, F38B6.4 - protein f38b6.4, vha-10 - protein vha-10, ndk-1 - protein ndk-1, R07H5.8 - protein r07h5.…
GO:0043523	regulation of neuron apoptotic process	0.000642	0.0098	1557.6	7788	1	5	1	[tra-1 - protein tra-1]
GO:0043525	positive regulation of neuron apoptotic process	0.000642	0.00977	1557.6	7788	1	5	1	[tra-1 - protein tra-1]
GO:1901216	positive regulation of neuron death	0.000642	0.00973	1557.6	7788	1	5	1	[tra-1 - protein tra-1]
GO:0019101	female somatic sex determination	0.000642	0.0097	1557.6	7788	1	5	1	[tra-1 - protein tra-1]
GO:0007620	copulation	0.000642	0.00966	1557.6	7788	1	5	1	[tra-1 - protein tra-1]
GO:0090066	regulation of anatomical structure size	0.000642	0.00963	4.63	7788	43	391	10	[unc-94 - protein unc-94, eps-8 - protein eps-8, tmd-2 - protein tmd-2, unc-60 - protein unc-60, lev-11 - protein lev-11, let-607 - protein let-607, aqp-7 - protein aqp-7, unc-73 - protein unc-73, adt-2 - protein adt-2, dbl-1 - protein dbl-1]
GO:0006461	protein complex assembly	0.000678	0.0101	1.54	7788	225	1479	66	[tba-4 - protein tba-4, F47F2.1 - protein f47f2.1, hcp-3 - protein hcp-3, btbd-10 - protein btbd-10, unc-15 - protein unc-15, glb-18 - protein glb-18, tom-1 - protein tom-1, nuo-1 - protein nuo-1, vab-10 - protein vab-10, hlh-1 - protein hlh-1, ipla-1 - protein ipla-1, crtc-1 - protein crtc-1, shk-1 - protein shk-1, unc-82 - protein unc-82, C02F5.7 - protein c02f5.7, ric-4 - protein ric-4, lis-1 …
GO:0032940	secretion by cell	0.00069	0.0103	1.57	7788	107	2588	56	[T14G10.5 - protein t14g10.5, bed-1 - protein bed-1, metr-1 - protein metr-1, prl-1 - protein prl-1, vps-37 - protein vps-37, epg-3 - protein epg-3, apt-9 - protein apt-9, paa-1 - protein paa-1, snap-1 - protein snap-1, rab-3 - protein rab-3, lpin-1 - protein lpin-1, vab-10 - protein vab-10, CELE_F38E11.5 - protein f38e11.5, R07H5.8 - protein r07h5.8, sec-15 - protein sec-15, fos-1 - protein fos-…
GO:0046903	secretion	0.00069	0.0102	1.57	7788	107	2588	56	[T14G10.5 - protein t14g10.5, bed-1 - protein bed-1, metr-1 - protein metr-1, prl-1 - protein prl-1, vps-37 - protein vps-37, epg-3 - protein epg-3, apt-9 - protein apt-9, snap-1 - protein snap-1, paa-1 - protein paa-1, lpin-1 - protein lpin-1, rab-3 - protein rab-3, vab-10 - protein vab-10, R07H5.8 - protein r07h5.8, CELE_F38E11.5 - protein f38e11.5, sec-15 - protein sec-15, fos-1 - protein fos-…
GO:0055086	nucleobase-containing small molecule metabolic process	0.000703	0.0104	1.28	7788	165	3983	108	[gspd-1 - protein gspd-1, dlg-1 - protein dlg-1, cdd-1 - protein cdd-1, pde-4 - protein pde-4, upp-1 - protein upp-1, R53.4 - protein r53.4, atp-3 - protein atp-3, R151.2 - protein r151.2, CELE_Y18D10A.3 - protein y18d10a.3, CELE_Y57G11C.3 - protein y57g11c.3, clk-1 - protein clk-1, B0228.7 - protein b0228.7, vha-10 - protein vha-10, R07H5.8 - protein r07h5.8, gars-1 - protein gars-1, mig-23 - pr…
GO:0048585	negative regulation of response to stimulus	0.000706	0.0104	2.33	7788	92	909	25	[lip-1 - protein lip-1, egl-10 - protein egl-10, nsy-4 - protein nsy-4, gck-1 - protein gck-1, gei-4 - protein gei-4, pde-4 - protein pde-4, gsa-1 - protein gsa-1, jnk-1 - protein jnk-1, pkc-1 - protein pkc-1, kin-2 - protein kin-2, atf-7 - protein atf-7, vhp-1 - protein vhp-1, grk-1 - protein grk-1, let-607 - protein let-607, crml-1 - protein crml-1, aak-2 - protein aak-2, pkg-1 - protein pkg-1,…
GO:0043207	response to external biotic stimulus	0.000729	0.0107	2.08	7788	76	1431	29	[lgg-2 - protein lgg-2, clec-52 - protein clec-52, hsf-1 - protein hsf-1, nlp-31 - protein nlp-31, C14C11.4 - protein c14c11.4, lgg-1 - protein lgg-1, dbl-1 - protein dbl-1, sek-1 - protein sek-1, aqp-1 - protein aqp-1, sma-3 - protein sma-3, pqm-1 - protein pqm-1, atf-7 - protein atf-7, daf-16 - protein daf-16, ikb-1 - protein ikb-1, jun-1 - protein jun-1, zip-2 - protein zip-2, smk-1 - protein …
GO:0009607	response to biotic stimulus	0.000729	0.0107	2.08	7788	76	1431	29	[lgg-2 - protein lgg-2, clec-52 - protein clec-52, hsf-1 - protein hsf-1, nlp-31 - protein nlp-31, C14C11.4 - protein c14c11.4, lgg-1 - protein lgg-1, dbl-1 - protein dbl-1, sek-1 - protein sek-1, aqp-1 - protein aqp-1, sma-3 - protein sma-3, pqm-1 - protein pqm-1, atf-7 - protein atf-7, daf-16 - protein daf-16, ikb-1 - protein ikb-1, jun-1 - protein jun-1, zip-2 - protein zip-2, smk-1 - protein …
GO:0060537	muscle tissue development	0.000742	0.0108	44.76	7788	2	174	2	[sgn-1 - protein sgn-1, daf-16 - protein daf-16]
GO:0009991	response to extracellular stimulus	0.000743	0.0108	3.18	7788	39	878	14	[lgg-2 - protein lgg-2, dgk-1 - protein dgk-1, nhr-40 - protein nhr-40, dhs-28 - protein dhs-28, chc-1 - protein chc-1, R12B2.6 - protein r12b2.6, aak-2 - protein aak-2, unc-70 - protein unc-70, sca-1 - protein sca-1, bec-1 - protein bec-1, daf-2 - protein daf-2, eat-16 - protein eat-16, fasn-1 - protein fasn-1, goa-1 - protein goa-1]
GO:0019693	ribose phosphate metabolic process	0.000781	0.0113	1.36	7788	108	4143	78	[CELE_T04A8.5 - protein t04a8.5, gspd-1 - protein gspd-1, enol-1 - protein enol-1, asg-2 - protein asg-2, asb-1 - protein asb-1, F19B6.1 - protein f19b6.1, pnk-1 - protein pnk-1, pde-4 - protein pde-4, R53.4 - protein r53.4, atp-3 - protein atp-3, vha-12 - protein vha-12, Y82E9BR.3 - protein y82e9br.3, CELE_Y57G11C.3 - protein y57g11c.3, gcy-35 - protein gcy-35, clk-1 - protein clk-1, ndk-1 - pro…
GO:0022607	cellular component assembly	0.000829	0.012	1.93	7788	368	395	36	[unc-23 - protein unc-23, lgg-2 - protein lgg-2, pptr-1 - protein pptr-1, dlg-1 - protein dlg-1, rga-5 - protein rga-5, F47F2.1 - protein f47f2.1, ric-7 - protein ric-7, rme-1 - protein rme-1, btbd-10 - protein btbd-10, unc-15 - protein unc-15, unc-87 - protein unc-87, pat-12 - protein pat-12, eps-8 - protein eps-8, vab-10 - protein vab-10, egl-27 - protein egl-27, tmd-2 - protein tmd-2, alg-1 - …
GO:2000243	positive regulation of reproductive process	0.000836	0.012	81.98	7788	5	38	2	[gsa-1 - protein gsa-1, kin-1 - protein kin-1]
GO:0045851	pH reduction	0.000844	0.0121	6.44	7788	6	1007	5	[vha-5 - protein vha-5, rab-14 - protein rab-14, unc-32 - protein unc-32, vha-7 - protein vha-7, unc-108 - protein unc-108]
GO:0051452	intracellular pH reduction	0.000844	0.0121	6.44	7788	6	1007	5	[vha-5 - protein vha-5, rab-14 - protein rab-14, unc-32 - protein unc-32, unc-108 - protein unc-108, vha-7 - protein vha-7]
GO:1902532	negative regulation of intracellular signal transduction	0.000871	0.0124	18.41	7788	36	47	4	[gsa-1 - protein gsa-1, pde-4 - protein pde-4, aak-2 - protein aak-2, vhp-1 - protein vhp-1]
GO:0009150	purine ribonucleotide metabolic process	0.000879	0.0125	1.38	7788	94	4143	69	[CELE_T04A8.5 - protein t04a8.5, enol-1 - protein enol-1, asg-2 - protein asg-2, asb-1 - protein asb-1, pnk-1 - protein pnk-1, pde-4 - protein pde-4, R53.4 - protein r53.4, atp-3 - protein atp-3, vha-12 - protein vha-12, Y82E9BR.3 - protein y82e9br.3, gcy-35 - protein gcy-35, clk-1 - protein clk-1, ndk-1 - protein ndk-1, vha-10 - protein vha-10, F38B6.4 - protein f38b6.4, R07H5.8 - protein r07h5.…
GO:0006807	nitrogen compound metabolic process	0.00089	0.0126	1.09	7788	1351	3923	745	[F30A10.9 - protein f30a10.9, nhr-14 - protein nhr-14, gut-2 - protein gut-2, pri-1 - protein pri-1, W01D2.1 - protein w01d2.1, hlh-11 - protein hlh-11, cdd-1 - protein cdd-1, CELE_Y53F4B.13 - protein y53f4b.13, nhr-86 - protein nhr-86, C07A9.2 - protein c07a9.2, dars-1 - protein dars-1, nhr-59 - protein nhr-59, F58G11.2 - protein f58g11.2, asns-2 - protein asns-2, CELE_Y18D10A.3 - protein y18d10…
GO:0002821	positive regulation of adaptive immune response	0.000899	0.0127	1112.57	7788	1	7	1	[daf-16 - protein daf-16]
GO:0002819	regulation of adaptive immune response	0.000899	0.0126	1112.57	7788	1	7	1	[daf-16 - protein daf-16]
GO:1901659	glycosyl compound biosynthetic process	0.000924	0.013	1.63	7788	58	3213	39	[R05G6.5 - protein r05g6.5, atp-4 - protein atp-4, asg-2 - protein asg-2, asb-1 - protein asb-1, F19B6.1 - protein f19b6.1, pnk-1 - protein pnk-1, C06G3.5 - protein c06g3.5, F54C1.6 - protein f54c1.6, atp-3 - protein atp-3, asg-1 - protein asg-1, Y82E9BR.3 - protein y82e9br.3, B0228.7 - protein b0228.7, ndk-1 - protein ndk-1, vha-10 - protein vha-10, F38B2.4 - protein f38b2.4, F40F8.1 - protein f…
GO:0009259	ribonucleotide metabolic process	0.00093	0.013	1.36	7788	102	4143	74	[CELE_T04A8.5 - protein t04a8.5, enol-1 - protein enol-1, asg-2 - protein asg-2, asb-1 - protein asb-1, F19B6.1 - protein f19b6.1, pnk-1 - protein pnk-1, pde-4 - protein pde-4, atp-3 - protein atp-3, R53.4 - protein r53.4, vha-12 - protein vha-12, Y82E9BR.3 - protein y82e9br.3, gcy-35 - protein gcy-35, clk-1 - protein clk-1, vha-10 - protein vha-10, F38B6.4 - protein f38b6.4, ndk-1 - protein ndk-…
GO:0042493	response to drug	0.000944	0.0131	3.65	7788	13	1479	9	[slo-1 - protein slo-1, nuo-1 - protein nuo-1, jun-1 - protein jun-1, unc-1 - protein unc-1, unc-24 - protein unc-24, clk-1 - protein clk-1, unc-7 - protein unc-7, unc-80 - protein unc-80, avr-14 - protein avr-14]
GO:0010939	regulation of necrotic cell death	0.000957	0.0133	4.15	7788	12	1250	8	[unc-57 - protein unc-57, unc-11 - protein unc-11, unc-116 - protein unc-116, lgg-1 - protein lgg-1, dyn-1 - protein dyn-1, rme-1 - protein rme-1, unc-104 - protein unc-104, dpy-23 - protein dpy-23]
GO:0044700	single organism signaling	0.000961	0.0133	2.14	7788	77	1279	27	[dhc-1 - protein dhc-1, dlg-1 - protein dlg-1, dgk-1 - protein dgk-1, daf-9 - protein daf-9, ace-2 - protein ace-2, nud-2 - protein nud-2, unc-38 - protein unc-38, ehs-1 - protein ehs-1, dbl-1 - protein dbl-1, sek-1 - protein sek-1, rab-3 - protein rab-3, abts-1 - protein abts-1, irx-1 - protein irx-1, cab-1 - protein cab-1, unc-43 - protein unc-43, eat-6 - protein eat-6, ric-3 - protein ric-3, c…
GO:0007267	cell-cell signaling	0.000961	0.0133	2.14	7788	77	1279	27	[dhc-1 - protein dhc-1, dlg-1 - protein dlg-1, dgk-1 - protein dgk-1, daf-9 - protein daf-9, ace-2 - protein ace-2, nud-2 - protein nud-2, unc-38 - protein unc-38, ehs-1 - protein ehs-1, dbl-1 - protein dbl-1, sek-1 - protein sek-1, rab-3 - protein rab-3, abts-1 - protein abts-1, cab-1 - protein cab-1, irx-1 - protein irx-1, unc-43 - protein unc-43, eat-6 - protein eat-6, ric-3 - protein ric-3, c…
GO:2000114	regulation of establishment of cell polarity	0.000993	0.0137	11.38	7788	7	391	4	[gsa-1 - protein gsa-1, kin-2 - protein kin-2, let-607 - protein let-607, acy-3 - protein acy-3]
GO:0090038	negative regulation of protein kinase C signaling	0.000993	0.0136	11.38	7788	7	391	4	[gsa-1 - protein gsa-1, kin-2 - protein kin-2, let-607 - protein let-607, acy-3 - protein acy-3]
GO:0090036	regulation of protein kinase C signaling	0.000993	0.0136	11.38	7788	7	391	4	[gsa-1 - protein gsa-1, let-607 - protein let-607, kin-2 - protein kin-2, acy-3 - protein acy-3]
