# Supplementary material for: Chromatin accessibility dynamics reveal novel functional enhancers in C. elegans
Source: Genome Res. 2017 Dec;27(12):2096–107. doi: 10.1101/gr.226233.117 (PMC5741055; doi:10.1101/gr.226233.117)
Supplement: Supplemental Material [file supp_gr.226233.117_Supplemental_Table_S6.xlsx]

## Sheet: S6 - L3 more access. vs YA - BP
GO Term	Description	P-value	FDR q-value	Enrichment	N	B	n	b	Genes
GO:0009653	anatomical structure morphogenesis	1.51e-18	6.45e-15	2.19	7788	683	743	143	[mab-31 - protein mab-31, die-1 - protein die-1, dpy-3 - protein dpy-3, let-268 - protein let-268, ceh-13 - protein ceh-13, mec-8 - protein mec-8, unc-97 - protein unc-97, dpy-4 - protein dpy-4, gei-13 - protein gei-13, dpy-5 - protein dpy-5, peb-1 - protein peb-1, efn-4 - protein efn-4, C02B10.5 - protein c02b10.5, nhr-23 - protein nhr-23, eps-8 - protein eps-8, ifb-1 - protein ifb-1, sptf-3 - p…
GO:0050794	regulation of cellular process	1.64e-17	3.51e-14	1.51	7788	1982	942	361	[nhr-14 - protein nhr-14, nhr-3 - protein nhr-3, hlh-11 - protein hlh-11, tep-1 - protein tep-1, cri-2 - protein cri-2, efn-4 - protein efn-4, CELE_C17E4.6 - protein c17e4.6, ptr-11 - protein ptr-11, jph-1 - protein jph-1, hum-6 - protein hum-6, sptf-3 - protein sptf-3, tmd-2 - protein tmd-2, F36H9.2 - protein f36h9.2, irx-1 - protein irx-1, eor-2 - protein eor-2, syg-1 - protein syg-1, nhr-85 - …
GO:0065007	biological regulation	4.51e-17	6.43e-14	1.38	7788	2850	942	475	[nhr-14 - protein nhr-14, ttr-48 - protein ttr-48, hlh-11 - protein hlh-11, CELE_C17E4.6 - protein c17e4.6, C07A9.2 - protein c07a9.2, ptr-11 - protein ptr-11, tnt-2 - protein tnt-2, sptf-3 - protein sptf-3, irx-1 - protein irx-1, ikb-1 - protein ikb-1, abts-3 - protein abts-3, C48A7.2 - protein c48a7.2, egl-19 - protein egl-19, tol-1 - protein tol-1, npax-2 - protein npax-2, uig-1 - protein uig-…
GO:0050789	regulation of biological process	5.81e-17	6.21e-14	1.6	7788	2464	517	261	[die-1 - protein die-1, nhr-14 - protein nhr-14, nhr-3 - protein nhr-3, tep-1 - protein tep-1, dpy-5 - protein dpy-5, efn-4 - protein efn-4, peb-1 - protein peb-1, ptr-11 - protein ptr-11, jph-1 - protein jph-1, tnt-2 - protein tnt-2, hum-6 - protein hum-6, F36H9.2 - protein f36h9.2, tmd-2 - protein tmd-2, syg-1 - protein syg-1, nhr-85 - protein nhr-85, fox-1 - protein fox-1, dmsr-1 - protein dms…
GO:0007165	signal transduction	1.22e-16	1.04e-13	1.34	7788	902	3175	494	[itr-1 - protein itr-1, nhr-61 - protein nhr-61, nhr-14 - protein nhr-14, flp-5 - protein flp-5, str-161 - protein str-161, nhr-86 - protein nhr-86, ptr-11 - protein ptr-11, rab-3 - protein rab-3, arl-3 - protein arl-3, nhr-56 - protein nhr-56, CELE_Y40A1A.1 - protein y40a1a.1, CELE_Y54E2A.1 - protein y54e2a.1, ikb-1 - protein ikb-1, tol-1 - protein tol-1, ser-5 - protein ser-5, F16C3.1 - protein…
GO:0051239	regulation of multicellular organismal process	1.48e-13	1.05e-10	2.08	7788	603	765	123	[die-1 - protein die-1, ceh-13 - protein ceh-13, lin-39 - protein lin-39, dpy-5 - protein dpy-5, lin-2 - protein lin-2, sma-5 - protein sma-5, tnt-2 - protein tnt-2, eps-8 - protein eps-8, nhr-23 - protein nhr-23, let-4 - protein let-4, lin-59 - protein lin-59, C48A7.2 - protein c48a7.2, nhr-40 - protein nhr-40, unc-93 - protein unc-93, hlh-2 - protein hlh-2, let-607 - protein let-607, din-1 - pr…
GO:0007610	behavior	3.17e-13	1.93e-10	2.16	7788	433	824	99	[mab-31 - protein mab-31, nipa-1 - protein nipa-1, lin-39 - protein lin-39, mec-8 - protein mec-8, C18H2.1 - protein c18h2.1, cog-1 - protein cog-1, lin-2 - protein lin-2, nhr-23 - protein nhr-23, ifb-1 - protein ifb-1, sptf-3 - protein sptf-3, let-4 - protein let-4, C26B9.3 - protein c26b9.3, fox-1 - protein fox-1, lin-59 - protein lin-59, egl-19 - protein egl-19, hbl-1 - protein hbl-1, ptc-1 - …
GO:0050793	regulation of developmental process	3.21e-13	1.71e-10	1.98	7788	628	765	122	[die-1 - protein die-1, ceh-13 - protein ceh-13, lin-39 - protein lin-39, dpy-5 - protein dpy-5, lin-2 - protein lin-2, sma-5 - protein sma-5, eps-8 - protein eps-8, nhr-23 - protein nhr-23, let-4 - protein let-4, lin-59 - protein lin-59, C48A7.2 - protein c48a7.2, hbl-1 - protein hbl-1, nhr-40 - protein nhr-40, hlh-2 - protein hlh-2, let-607 - protein let-607, din-1 - protein din-1, srgp-1 - pro…
GO:0040011	locomotion	4.37e-13	2.07e-10	1.53	7788	1267	1015	253	[dpy-3 - protein dpy-3, lbp-5 - protein lbp-5, F45E4.3 - protein f45e4.3, gei-13 - protein gei-13, CELE_E03H4.8 - protein e03h4.8, peb-1 - protein peb-1, efn-4 - protein efn-4, C07A9.2 - protein c07a9.2, jph-1 - protein jph-1, csq-1 - protein csq-1, tnt-2 - protein tnt-2, ifb-1 - protein ifb-1, unc-27 - protein unc-27, sptf-3 - protein sptf-3, eor-2 - protein eor-2, F13C5.2 - protein f13c5.2, let…
GO:0019098	reproductive behavior	6.78e-13	2.9e-10	2.88	7788	316	505	59	[C15A11.2 - protein c15a11.2, lin-42 - protein lin-42, mig-15 - protein mig-15, lin-39 - protein lin-39, nsy-4 - protein nsy-4, C18H2.1 - protein c18h2.1, lin-2 - protein lin-2, daf-12 - protein daf-12, nhr-23 - protein nhr-23, unc-53 - protein unc-53, egl-27 - protein egl-27, C26B9.3 - protein c26b9.3, fox-1 - protein fox-1, unc-62 - protein unc-62, egl-19 - protein egl-19, hbl-1 - protein hbl-1…
GO:0044705	multi-organism reproductive behavior	6.78e-13	2.63e-10	2.88	7788	316	505	59	[C15A11.2 - protein c15a11.2, lin-42 - protein lin-42, mig-15 - protein mig-15, lin-39 - protein lin-39, nsy-4 - protein nsy-4, C18H2.1 - protein c18h2.1, lin-2 - protein lin-2, daf-12 - protein daf-12, nhr-23 - protein nhr-23, unc-53 - protein unc-53, egl-27 - protein egl-27, C26B9.3 - protein c26b9.3, fox-1 - protein fox-1, unc-62 - protein unc-62, egl-19 - protein egl-19, hbl-1 - protein hbl-1…
GO:0051705	multi-organism behavior	7.79e-13	2.78e-10	2.87	7788	317	505	59	[C15A11.2 - protein c15a11.2, lin-42 - protein lin-42, mig-15 - protein mig-15, lin-39 - protein lin-39, nsy-4 - protein nsy-4, C18H2.1 - protein c18h2.1, lin-2 - protein lin-2, daf-12 - protein daf-12, nhr-23 - protein nhr-23, unc-53 - protein unc-53, egl-27 - protein egl-27, C26B9.3 - protein c26b9.3, fox-1 - protein fox-1, unc-62 - protein unc-62, egl-19 - protein egl-19, hbl-1 - protein hbl-1…
GO:0097485	neuron projection guidance	1.18e-12	3.87e-10	8.28	7788	82	241	21	[sax-3 - protein sax-3, unc-6 - protein unc-6, mig-15 - protein mig-15, vab-2 - protein vab-2, ceh-13 - protein ceh-13, lin-39 - protein lin-39, unc-44 - protein unc-44, mig-10 - protein mig-10, tag-333 - protein tag-333, unc-5 - protein unc-5, trim-9 - protein trim-9, nck-1 - protein nck-1, unc-53 - protein unc-53, cam-1 - protein cam-1, sad-1 - protein sad-1, lin-17 - protein lin-17, vab-1 - pr…
GO:0007411	axon guidance	1.18e-12	3.59e-10	8.28	7788	82	241	21	[sax-3 - protein sax-3, unc-6 - protein unc-6, mig-15 - protein mig-15, vab-2 - protein vab-2, ceh-13 - protein ceh-13, lin-39 - protein lin-39, unc-44 - protein unc-44, mig-10 - protein mig-10, unc-5 - protein unc-5, tag-333 - protein tag-333, trim-9 - protein trim-9, unc-53 - protein unc-53, nck-1 - protein nck-1, cam-1 - protein cam-1, sad-1 - protein sad-1, lin-17 - protein lin-17, vab-1 - pr…
GO:0048518	positive regulation of biological process	1.97e-12	5.61e-10	1.64	7788	766	1169	189	[cls-1 - protein cls-1, sqv-6 - protein sqv-6, ceh-13 - protein ceh-13, lin-39 - protein lin-39, sipa-1 - protein sipa-1, ces-2 - protein ces-2, sel-7 - protein sel-7, cdk-2 - protein cdk-2, dve-1 - protein dve-1, lin-2 - protein lin-2, peb-1 - protein peb-1, crh-1 - protein crh-1, jph-1 - protein jph-1, ifb-2 - protein ifb-2, sma-5 - protein sma-5, nhr-23 - protein nhr-23, eps-8 - protein eps-8,…
GO:0010171	body morphogenesis	2.26e-12	6.03e-10	2.08	7788	501	763	102	[die-1 - protein die-1, dpy-3 - protein dpy-3, let-268 - protein let-268, ceh-13 - protein ceh-13, dpy-4 - protein dpy-4, unc-97 - protein unc-97, gei-13 - protein gei-13, dpy-5 - protein dpy-5, C02B10.5 - protein c02b10.5, nhr-23 - protein nhr-23, ifb-1 - protein ifb-1, sptf-3 - protein sptf-3, irx-1 - protein irx-1, egl-19 - protein egl-19, hbl-1 - protein hbl-1, hlh-2 - protein hlh-2, let-607 …
GO:0006928	movement of cell or subcellular component	2.62e-12	6.6e-10	2.94	7788	349	418	55	[unc-6 - protein unc-6, mig-15 - protein mig-15, klp-3 - protein klp-3, ceh-13 - protein ceh-13, ceh-18 - protein ceh-18, lin-39 - protein lin-39, efn-4 - protein efn-4, nck-1 - protein nck-1, unc-53 - protein unc-53, unc-70 - protein unc-70, vab-1 - protein vab-1, let-2 - protein let-2, CELE_Y39E4B.6 - protein y39e4b.6, sdn-1 - protein sdn-1, unc-62 - protein unc-62, noca-1 - protein noca-1, tra…
GO:0048523	negative regulation of cellular process	3.3e-12	7.84e-10	2.06	7788	358	1045	99	[C44B11.1 - protein c44b11.1, tep-1 - protein tep-1, cri-2 - protein cri-2, sel-7 - protein sel-7, pde-4 - protein pde-4, nsy-7 - protein nsy-7, eps-8 - protein eps-8, vab-10 - protein vab-10, tmd-2 - protein tmd-2, mab-5 - protein mab-5, tag-196 - protein tag-196, mab-3 - protein mab-3, hbl-1 - protein hbl-1, elt-1 - protein elt-1, let-607 - protein let-607, crml-1 - protein crml-1, epn-1 - prot…
GO:0007166	cell surface receptor signaling pathway	3.52e-12	7.92e-10	3.7	7788	165	497	39	[cfz-2 - protein cfz-2, unc-6 - protein unc-6, mig-1 - protein mig-1, mnk-1 - protein mnk-1, unc-5 - protein unc-5, efn-4 - protein efn-4, dbl-1 - protein dbl-1, abl-1 - protein abl-1, egl-27 - protein egl-27, cam-1 - protein cam-1, dsh-1 - protein dsh-1, rgl-1 - protein rgl-1, F36H9.2 - protein f36h9.2, pkc-1 - protein pkc-1, lin-17 - protein lin-17, vab-1 - protein vab-1, Y43C5B.2 - protein y43…
GO:0044703	multi-organism reproductive process	4.28e-12	9.14e-10	2.77	7788	329	505	59	[C15A11.2 - protein c15a11.2, lin-42 - protein lin-42, mig-15 - protein mig-15, lin-39 - protein lin-39, nsy-4 - protein nsy-4, C18H2.1 - protein c18h2.1, lin-2 - protein lin-2, daf-12 - protein daf-12, nhr-23 - protein nhr-23, unc-53 - protein unc-53, egl-27 - protein egl-27, C26B9.3 - protein c26b9.3, fox-1 - protein fox-1, unc-62 - protein unc-62, egl-19 - protein egl-19, hbl-1 - protein hbl-1…
GO:0033057	multicellular organismal reproductive behavior	4.72e-12	9.6e-10	2.82	7788	312	505	57	[C15A11.2 - protein c15a11.2, lin-42 - protein lin-42, mig-15 - protein mig-15, lin-39 - protein lin-39, nsy-4 - protein nsy-4, C18H2.1 - protein c18h2.1, lin-2 - protein lin-2, daf-12 - protein daf-12, nhr-23 - protein nhr-23, unc-53 - protein unc-53, egl-27 - protein egl-27, C26B9.3 - protein c26b9.3, fox-1 - protein fox-1, unc-62 - protein unc-62, egl-19 - protein egl-19, hbl-1 - protein hbl-1…
GO:0051094	positive regulation of developmental process	6.59e-12	1.28e-09	2.95	7788	327	428	53	[ceh-13 - protein ceh-13, lin-39 - protein lin-39, dbl-1 - protein dbl-1, sma-5 - protein sma-5, eps-8 - protein eps-8, nhr-23 - protein nhr-23, unc-53 - protein unc-53, hlh-1 - protein hlh-1, alg-1 - protein alg-1, let-2 - protein let-2, unc-43 - protein unc-43, glf-1 - protein glf-1, nhr-40 - protein nhr-40, unc-10 - protein unc-10, hlh-2 - protein hlh-2, let-607 - protein let-607, din-1 - prot…
GO:0044706	multi-multicellular organism process	1.4e-11	2.6e-09	2.75	7788	320	505	57	[C15A11.2 - protein c15a11.2, lin-42 - protein lin-42, mig-15 - protein mig-15, lin-39 - protein lin-39, nsy-4 - protein nsy-4, C18H2.1 - protein c18h2.1, lin-2 - protein lin-2, daf-12 - protein daf-12, nhr-23 - protein nhr-23, unc-53 - protein unc-53, egl-27 - protein egl-27, C26B9.3 - protein c26b9.3, fox-1 - protein fox-1, unc-62 - protein unc-62, egl-19 - protein egl-19, hbl-1 - protein hbl-1…
GO:0040012	regulation of locomotion	1.81e-11	3.23e-09	2.27	7788	152	1509	67	[gpb-2 - protein gpb-2, unc-6 - protein unc-6, sup-12 - protein sup-12, mig-15 - protein mig-15, R13A5.7 - protein r13a5.7, egl-10 - protein egl-10, pde-4 - protein pde-4, blmp-1 - protein blmp-1, glr-1 - protein glr-1, rab-3 - protein rab-3, abl-1 - protein abl-1, dyc-1 - protein dyc-1, unc-53 - protein unc-53, egl-27 - protein egl-27, mtm-9 - protein mtm-9, unc-70 - protein unc-70, mab-5 - prot…
GO:0051704	multi-organism process	2.88e-11	4.93e-09	2.1	7788	405	824	90	[mab-31 - protein mab-31, C15A11.2 - protein c15a11.2, clec-52 - protein clec-52, lin-42 - protein lin-42, mig-15 - protein mig-15, nsy-4 - protein nsy-4, lin-39 - protein lin-39, klp-11 - protein klp-11, C18H2.1 - protein c18h2.1, cog-1 - protein cog-1, dbl-1 - protein dbl-1, lin-2 - protein lin-2, daf-14 - protein daf-14, abl-1 - protein abl-1, daf-12 - protein daf-12, unc-53 - protein unc-53, …
GO:0048870	cell motility	4.28e-11	7.04e-09	3.19	7788	257	418	44	[unc-6 - protein unc-6, mig-15 - protein mig-15, cyd-1 - protein cyd-1, ceh-18 - protein ceh-18, lin-39 - protein lin-39, hmr-1 - protein hmr-1, cca-1 - protein cca-1, tag-333 - protein tag-333, unc-5 - protein unc-5, efn-4 - protein efn-4, sem-5 - protein sem-5, unc-53 - protein unc-53, cam-1 - protein cam-1, vab-1 - protein vab-1, let-2 - protein let-2, CELE_Y39E4B.6 - protein y39e4b.6, lit-1 -…
GO:0016477	cell migration	8.06e-11	1.28e-08	3.18	7788	252	418	43	[unc-6 - protein unc-6, mig-15 - protein mig-15, cyd-1 - protein cyd-1, ceh-18 - protein ceh-18, lin-39 - protein lin-39, hmr-1 - protein hmr-1, unc-5 - protein unc-5, tag-333 - protein tag-333, efn-4 - protein efn-4, sem-5 - protein sem-5, unc-53 - protein unc-53, cam-1 - protein cam-1, vab-1 - protein vab-1, let-2 - protein let-2, CELE_Y39E4B.6 - protein y39e4b.6, lit-1 - protein lit-1, sdn-1 -…
GO:0051240	positive regulation of multicellular organismal process	9.17e-11	1.4e-08	2.83	7788	328	428	51	[ceh-13 - protein ceh-13, lin-39 - protein lin-39, dbl-1 - protein dbl-1, sma-5 - protein sma-5, nhr-23 - protein nhr-23, eps-8 - protein eps-8, unc-53 - protein unc-53, alg-1 - protein alg-1, let-2 - protein let-2, unc-43 - protein unc-43, glf-1 - protein glf-1, nhr-40 - protein nhr-40, unc-10 - protein unc-10, hlh-2 - protein hlh-2, let-607 - protein let-607, din-1 - protein din-1, unc-44 - pro…
GO:0018991	oviposition	3.31e-10	4.89e-08	2.28	7788	282	824	68	[C15A11.2 - protein c15a11.2, mab-31 - protein mab-31, lin-42 - protein lin-42, mig-15 - protein mig-15, nsy-4 - protein nsy-4, lin-39 - protein lin-39, C18H2.1 - protein c18h2.1, cog-1 - protein cog-1, lin-2 - protein lin-2, daf-14 - protein daf-14, unc-53 - protein unc-53, nhr-23 - protein nhr-23, egl-27 - protein egl-27, ifb-1 - protein ifb-1, sptf-3 - protein sptf-3, syd-2 - protein syd-2, le…
GO:0048583	regulation of response to stimulus	8.17e-10	1.16e-07	1.87	7788	288	1386	96	[Y32H12A.4 - protein y32h12a.4, mig-15 - protein mig-15, egl-10 - protein egl-10, lin-28 - protein lin-28, nsy-4 - protein nsy-4, sipa-1 - protein sipa-1, nekl-3 - protein nekl-3, pde-4 - protein pde-4, sel-7 - protein sel-7, irk-1 - protein irk-1, kin-18 - protein kin-18, dbl-1 - protein dbl-1, sel-2 - protein sel-2, dyc-1 - protein dyc-1, rab-3 - protein rab-3, abl-1 - protein abl-1, daf-12 - p…
GO:0048638	regulation of developmental growth	2.28e-09	3.14e-07	2.22	7788	302	765	66	[ceh-13 - protein ceh-13, dpy-5 - protein dpy-5, blmp-1 - protein blmp-1, dbl-1 - protein dbl-1, sma-5 - protein sma-5, unc-53 - protein unc-53, nhr-23 - protein nhr-23, rig-6 - protein rig-6, alg-1 - protein alg-1, let-4 - protein let-4, let-2 - protein let-2, unc-43 - protein unc-43, obr-3 - protein obr-3, lin-59 - protein lin-59, glf-1 - protein glf-1, unc-10 - protein unc-10, nhr-40 - protein…
GO:0019222	regulation of metabolic process	3.93e-09	5.25e-07	2.17	7788	1126	210	66	[gmeb-2 - protein gmeb-2, lin-42 - protein lin-42, nhr-14 - protein nhr-14, mig-15 - protein mig-15, lin-39 - protein lin-39, nsy-4 - protein nsy-4, pac-1 - protein pac-1, cnt-2 - protein cnt-2, fkh-9 - protein fkh-9, mec-1 - protein mec-1, nhr-32 - protein nhr-32, dyc-1 - protein dyc-1, daf-12 - protein daf-12, nhr-23 - protein nhr-23, hlh-1 - protein hlh-1, egl-27 - protein egl-27, nhr-85 - pro…
GO:0019219	regulation of nucleobase-containing compound metabolic process	4.21e-09	5.46e-07	1.66	7788	688	942	138	[nhr-14 - protein nhr-14, lin-39 - protein lin-39, nhr-3 - protein nhr-3, hlh-11 - protein hlh-11, CELE_C17E4.6 - protein c17e4.6, crh-1 - protein crh-1, nsy-7 - protein nsy-7, nhr-23 - protein nhr-23, nhr-64 - protein nhr-64, sptf-3 - protein sptf-3, irx-1 - protein irx-1, mab-5 - protein mab-5, nhr-85 - protein nhr-85, fos-1 - protein fos-1, lin-59 - protein lin-59, mab-3 - protein mab-3, hbl-1…
GO:0007275	multicellular organismal development	4.89e-09	6.15e-07	1.97	7788	316	1028	82	[lin-42 - protein lin-42, sqv-6 - protein sqv-6, ceh-13 - protein ceh-13, lin-28 - protein lin-28, ceh-18 - protein ceh-18, lin-39 - protein lin-39, akt-2 - protein akt-2, nekl-3 - protein nekl-3, mab-21 - protein mab-21, efn-4 - protein efn-4, blmp-1 - protein blmp-1, pan-1 - protein pan-1, unc-53 - protein unc-53, hlh-1 - protein hlh-1, egl-27 - protein egl-27, let-19 - protein let-19, vab-1 - …
GO:0090066	regulation of anatomical structure size	5.5e-09	6.72e-07	5	7788	43	724	20	[let-653 - protein let-653, let-607 - protein let-607, aqp-2 - protein aqp-2, dbl-1 - protein dbl-1, add-1 - protein add-1, unc-94 - protein unc-94, exc-9 - protein exc-9, sma-1 - protein sma-1, eps-8 - protein eps-8, sma-3 - protein sma-3, tmd-2 - protein tmd-2, gsnl-1 - protein gsnl-1, lev-11 - protein lev-11, unc-60 - protein unc-60, aqp-7 - protein aqp-7, let-4 - protein let-4, unc-73 - prote…
GO:0031323	regulation of cellular metabolic process	6.44e-09	7.64e-07	1.56	7788	899	926	167	[nhr-14 - protein nhr-14, nhr-3 - protein nhr-3, lin-39 - protein lin-39, tep-1 - protein tep-1, hlh-11 - protein hlh-11, cri-2 - protein cri-2, CELE_C17E4.6 - protein c17e4.6, crh-1 - protein crh-1, nsy-7 - protein nsy-7, nhr-23 - protein nhr-23, sptf-3 - protein sptf-3, nhr-64 - protein nhr-64, irx-1 - protein irx-1, nhr-85 - protein nhr-85, mab-5 - protein mab-5, shc-1 - protein shc-1, tag-196…
GO:0040008	regulation of growth	6.72e-09	7.77e-07	2.14	7788	323	765	68	[ceh-13 - protein ceh-13, dpy-5 - protein dpy-5, dbl-1 - protein dbl-1, blmp-1 - protein blmp-1, peb-1 - protein peb-1, sma-5 - protein sma-5, unc-53 - protein unc-53, nhr-23 - protein nhr-23, rig-6 - protein rig-6, alg-1 - protein alg-1, let-4 - protein let-4, let-2 - protein let-2, unc-43 - protein unc-43, obr-3 - protein obr-3, lin-59 - protein lin-59, glf-1 - protein glf-1, unc-10 - protein u…
GO:0080090	regulation of primary metabolic process	8.38e-09	9.43e-07	1.56	7788	888	926	165	[nhr-14 - protein nhr-14, nhr-3 - protein nhr-3, lin-39 - protein lin-39, tep-1 - protein tep-1, hlh-11 - protein hlh-11, cri-2 - protein cri-2, CELE_C17E4.6 - protein c17e4.6, crh-1 - protein crh-1, nsy-7 - protein nsy-7, nhr-23 - protein nhr-23, sptf-3 - protein sptf-3, nhr-64 - protein nhr-64, irx-1 - protein irx-1, nhr-85 - protein nhr-85, mab-5 - protein mab-5, tag-196 - protein tag-196, fos…
GO:0051252	regulation of RNA metabolic process	1.02e-08	1.11e-06	1.66	7788	657	942	132	[nhr-14 - protein nhr-14, lin-39 - protein lin-39, nhr-3 - protein nhr-3, hlh-11 - protein hlh-11, CELE_C17E4.6 - protein c17e4.6, crh-1 - protein crh-1, nsy-7 - protein nsy-7, nhr-23 - protein nhr-23, nhr-64 - protein nhr-64, sptf-3 - protein sptf-3, irx-1 - protein irx-1, mab-5 - protein mab-5, nhr-85 - protein nhr-85, fos-1 - protein fos-1, mab-3 - protein mab-3, lin-59 - protein lin-59, hbl-1…
GO:0008078	mesodermal cell migration	1.15e-08	1.23e-06	10.9	7788	10	643	9	[unc-6 - protein unc-6, unc-53 - protein unc-53, ina-1 - protein ina-1, vab-8 - protein vab-8, dre-1 - protein dre-1, mig-10 - protein mig-10, unc-39 - protein unc-39, unc-73 - protein unc-73, unc-5 - protein unc-5]
GO:0048639	positive regulation of developmental growth	1.2e-08	1.25e-06	2.25	7788	267	764	59	[ceh-13 - protein ceh-13, dbl-1 - protein dbl-1, blmp-1 - protein blmp-1, sma-5 - protein sma-5, nhr-23 - protein nhr-23, unc-53 - protein unc-53, rig-6 - protein rig-6, let-4 - protein let-4, alg-1 - protein alg-1, let-2 - protein let-2, unc-43 - protein unc-43, glf-1 - protein glf-1, unc-10 - protein unc-10, nhr-40 - protein nhr-40, lsy-12 - protein lsy-12, syd-9 - protein syd-9, unc-44 - prote…
GO:0040014	regulation of multicellular organism growth	1.71e-08	1.74e-06	2.18	7788	289	765	62	[ceh-13 - protein ceh-13, dpy-5 - protein dpy-5, blmp-1 - protein blmp-1, dbl-1 - protein dbl-1, sma-5 - protein sma-5, unc-53 - protein unc-53, nhr-23 - protein nhr-23, rig-6 - protein rig-6, alg-1 - protein alg-1, let-4 - protein let-4, let-2 - protein let-2, unc-43 - protein unc-43, obr-3 - protein obr-3, lin-59 - protein lin-59, glf-1 - protein glf-1, unc-10 - protein unc-10, nhr-40 - protein…
GO:0045927	positive regulation of growth	1.77e-08	1.76e-06	2.2	7788	283	764	61	[ceh-13 - protein ceh-13, dbl-1 - protein dbl-1, blmp-1 - protein blmp-1, peb-1 - protein peb-1, sma-5 - protein sma-5, nhr-23 - protein nhr-23, unc-53 - protein unc-53, rig-6 - protein rig-6, alg-1 - protein alg-1, let-4 - protein let-4, let-2 - protein let-2, unc-43 - protein unc-43, glf-1 - protein glf-1, unc-10 - protein unc-10, nhr-40 - protein nhr-40, lsy-12 - protein lsy-12, unc-44 - prote…
GO:0032502	developmental process	2.09e-08	2.03e-06	1.58	7788	3195	164	106	[dlg-1 - protein dlg-1, klp-3 - protein klp-3, ceh-13 - protein ceh-13, lin-39 - protein lin-39, mec-8 - protein mec-8, gei-13 - protein gei-13, klc-2 - protein klc-2, peb-1 - protein peb-1, C02B10.5 - protein c02b10.5, eps-8 - protein eps-8, nhr-23 - protein nhr-23, nhr-85 - protein nhr-85, syg-1 - protein syg-1, C18A3.4 - protein c18a3.4, unc-82 - protein unc-82, hbl-1 - protein hbl-1, egl-19 -…
GO:0032501	multicellular organismal process	2.1e-08	1.99e-06	1.71	7788	2377	180	94	[dlg-1 - protein dlg-1, lin-42 - protein lin-42, nhr-14 - protein nhr-14, mig-15 - protein mig-15, ceh-13 - protein ceh-13, lin-39 - protein lin-39, anc-1 - protein anc-1, mec-8 - protein mec-8, dpy-10 - protein dpy-10, pde-4 - protein pde-4, klc-2 - protein klc-2, mvk-1 - protein mvk-1, peb-1 - protein peb-1, C07A9.2 - protein c07a9.2, daf-12 - protein daf-12, jph-1 - protein jph-1, mdl-1 - prot…
GO:0045597	positive regulation of cell differentiation	2.2e-08	2.04e-06	15.73	7788	11	360	8	[jun-1 - protein jun-1, kin-1 - protein kin-1, gsa-1 - protein gsa-1, unc-53 - protein unc-53, hlh-1 - protein hlh-1, hlh-2 - protein hlh-2, unc-73 - protein unc-73, unc-5 - protein unc-5]
GO:0010646	regulation of cell communication	3.77e-08	3.43e-06	1.83	7788	232	1501	82	[Y32H12A.4 - protein y32h12a.4, gpb-2 - protein gpb-2, mig-15 - protein mig-15, egl-10 - protein egl-10, nsy-4 - protein nsy-4, sipa-1 - protein sipa-1, nekl-3 - protein nekl-3, sel-7 - protein sel-7, pde-4 - protein pde-4, irk-1 - protein irk-1, kin-18 - protein kin-18, dbl-1 - protein dbl-1, sel-2 - protein sel-2, sra-13 - protein sra-13, abl-1 - protein abl-1, abts-1 - protein abts-1, cgef-2 -…
GO:0031324	negative regulation of cellular metabolic process	4.5e-08	4.01e-06	2.23	7788	177	1045	53	[lin-42 - protein lin-42, F22E12.1 - protein f22e12.1, nsy-4 - protein nsy-4, lin-28 - protein lin-28, tep-1 - protein tep-1, mec-1 - protein mec-1, cri-2 - protein cri-2, sel-7 - protein sel-7, T28C12.6 - protein t28c12.6, blmp-1 - protein blmp-1, nsy-7 - protein nsy-7, mab-5 - protein mab-5, atf-7 - protein atf-7, CELE_Y39E4B.6 - protein y39e4b.6, cfi-1 - protein cfi-1, tag-196 - protein tag-19…
GO:0000122	negative regulation of transcription from RNA polymerase II promoter	4.98e-08	4.35e-06	3.46	7788	56	1045	26	[lin-42 - protein lin-42, sel-7 - protein sel-7, blmp-1 - protein blmp-1, daf-5 - protein daf-5, nsy-7 - protein nsy-7, mab-5 - protein mab-5, atf-7 - protein atf-7, CELE_Y39E4B.6 - protein y39e4b.6, cfi-1 - protein cfi-1, daf-16 - protein daf-16, mab-3 - protein mab-3, jun-1 - protein jun-1, hbl-1 - protein hbl-1, atf-2 - protein atf-2, elt-1 - protein elt-1, mef-2 - protein mef-2, unc-130 - pro…
GO:0001667	ameboidal-type cell migration	5.21e-08	4.45e-06	6.8	7788	22	677	13	[unc-6 - protein unc-6, vab-8 - protein vab-8, hmr-1 - protein hmr-1, dre-1 - protein dre-1, mig-10 - protein mig-10, unc-5 - protein unc-5, efn-4 - protein efn-4, hmp-1 - protein hmp-1, unc-53 - protein unc-53, ina-1 - protein ina-1, unc-39 - protein unc-39, unc-73 - protein unc-73, sax-7 - protein sax-7]
GO:0044767	single-organism developmental process	5.31e-08	4.45e-06	1.57	7788	3149	164	104	[dlg-1 - protein dlg-1, klp-3 - protein klp-3, ceh-13 - protein ceh-13, lin-39 - protein lin-39, mec-8 - protein mec-8, gei-13 - protein gei-13, klc-2 - protein klc-2, peb-1 - protein peb-1, C02B10.5 - protein c02b10.5, eps-8 - protein eps-8, nhr-23 - protein nhr-23, nhr-85 - protein nhr-85, syg-1 - protein syg-1, C18A3.4 - protein c18a3.4, unc-82 - protein unc-82, hbl-1 - protein hbl-1, egl-19 -…
GO:0040018	positive regulation of multicellular organism growth	6.37e-08	5.24e-06	2.19	7788	265	764	57	[ceh-13 - protein ceh-13, dbl-1 - protein dbl-1, blmp-1 - protein blmp-1, sma-5 - protein sma-5, nhr-23 - protein nhr-23, unc-53 - protein unc-53, rig-6 - protein rig-6, let-4 - protein let-4, alg-1 - protein alg-1, let-2 - protein let-2, unc-43 - protein unc-43, glf-1 - protein glf-1, unc-10 - protein unc-10, nhr-40 - protein nhr-40, lsy-12 - protein lsy-12, unc-44 - protein unc-44, syd-9 - prot…
GO:0044707	single-multicellular organism process	6.5e-08	5.24e-06	1.73	7788	2256	176	88	[dlg-1 - protein dlg-1, lin-42 - protein lin-42, nhr-14 - protein nhr-14, mig-15 - protein mig-15, ceh-13 - protein ceh-13, lin-39 - protein lin-39, anc-1 - protein anc-1, mec-8 - protein mec-8, dpy-10 - protein dpy-10, pde-4 - protein pde-4, klc-2 - protein klc-2, mvk-1 - protein mvk-1, peb-1 - protein peb-1, C07A9.2 - protein c07a9.2, daf-12 - protein daf-12, jph-1 - protein jph-1, mdl-1 - prot…
GO:0022610	biological adhesion	7.02e-08	5.56e-06	2.95	7788	65	1257	31	[frk-1 - protein frk-1, deb-1 - protein deb-1, ceh-13 - protein ceh-13, nsy-4 - protein nsy-4, hmr-1 - protein hmr-1, ctn-1 - protein ctn-1, vab-10 - protein vab-10, ina-1 - protein ina-1, egl-27 - protein egl-27, fmi-1 - protein fmi-1, cdh-1 - protein cdh-1, T01D3.1 - protein t01d3.1, dig-1 - protein dig-1, cdh-4 - protein cdh-4, epi-1 - protein epi-1, ncam-1 - protein ncam-1, scav-4 - protein s…
GO:0007155	cell adhesion	7.02e-08	5.46e-06	2.95	7788	65	1257	31	[frk-1 - protein frk-1, deb-1 - protein deb-1, ceh-13 - protein ceh-13, nsy-4 - protein nsy-4, hmr-1 - protein hmr-1, ctn-1 - protein ctn-1, vab-10 - protein vab-10, ina-1 - protein ina-1, egl-27 - protein egl-27, fmi-1 - protein fmi-1, cdh-1 - protein cdh-1, T01D3.1 - protein t01d3.1, dig-1 - protein dig-1, cdh-4 - protein cdh-4, epi-1 - protein epi-1, ncam-1 - protein ncam-1, scav-4 - protein s…
GO:0090598	male anatomical structure morphogenesis	7.64e-08	5.83e-06	3.73	7788	73	715	25	[mab-31 - protein mab-31, unc-6 - protein unc-6, ptr-18 - protein ptr-18, unc-5 - protein unc-5, efn-4 - protein efn-4, dbl-1 - protein dbl-1, eff-1 - protein eff-1, exc-9 - protein exc-9, ina-1 - protein ina-1, egl-27 - protein egl-27, eor-2 - protein eor-2, sma-3 - protein sma-3, lin-17 - protein lin-17, lin-59 - protein lin-59, mab-3 - protein mab-3, hlh-2 - protein hlh-2, unc-130 - protein un…
GO:0009755	hormone-mediated signaling pathway	8.56e-08	6.42e-06	1.41	7788	191	3812	132	[nhr-61 - protein nhr-61, paqr-2 - protein paqr-2, nhr-14 - protein nhr-14, nhr-3 - protein nhr-3, nhr-86 - protein nhr-86, nhr-243 - protein nhr-243, nhr-104 - protein nhr-104, nhr-68 - protein nhr-68, nhr-112 - protein nhr-112, nhr-59 - protein nhr-59, nhr-74 - protein nhr-74, nhr-23 - protein nhr-23, nhr-17 - protein nhr-17, nhr-47 - protein nhr-47, nhr-7 - protein nhr-7, nhr-64 - protein nhr-…
GO:2001141	regulation of RNA biosynthetic process	8.58e-08	6.33e-06	1.63	7788	646	942	127	[nhr-14 - protein nhr-14, lin-39 - protein lin-39, nhr-3 - protein nhr-3, hlh-11 - protein hlh-11, CELE_C17E4.6 - protein c17e4.6, crh-1 - protein crh-1, nsy-7 - protein nsy-7, nhr-23 - protein nhr-23, nhr-64 - protein nhr-64, sptf-3 - protein sptf-3, irx-1 - protein irx-1, mab-5 - protein mab-5, nhr-85 - protein nhr-85, fos-1 - protein fos-1, mab-3 - protein mab-3, lin-59 - protein lin-59, hbl-1…
GO:1903506	regulation of nucleic acid-templated transcription	8.58e-08	6.22e-06	1.63	7788	646	942	127	[nhr-14 - protein nhr-14, lin-39 - protein lin-39, nhr-3 - protein nhr-3, hlh-11 - protein hlh-11, CELE_C17E4.6 - protein c17e4.6, crh-1 - protein crh-1, nsy-7 - protein nsy-7, nhr-23 - protein nhr-23, nhr-64 - protein nhr-64, sptf-3 - protein sptf-3, irx-1 - protein irx-1, mab-5 - protein mab-5, nhr-85 - protein nhr-85, fos-1 - protein fos-1, mab-3 - protein mab-3, lin-59 - protein lin-59, hbl-1…
GO:0016043	cellular component organization	8.61e-08	6.13e-06	2.38	7788	1011	152	47	[dlg-1 - protein dlg-1, mig-15 - protein mig-15, F47F2.1 - protein f47f2.1, ceh-13 - protein ceh-13, klp-3 - protein klp-3, lin-39 - protein lin-39, mec-8 - protein mec-8, anc-1 - protein anc-1, mec-1 - protein mec-1, unc-5 - protein unc-5, klc-2 - protein klc-2, trim-9 - protein trim-9, unc-94 - protein unc-94, dyc-1 - protein dyc-1, jph-1 - protein jph-1, sgn-1 - protein sgn-1, pat-12 - protein…
GO:0006355	regulation of transcription, DNA-templated	8.83e-08	6.19e-06	1.63	7788	640	942	126	[nhr-14 - protein nhr-14, lin-39 - protein lin-39, nhr-3 - protein nhr-3, hlh-11 - protein hlh-11, CELE_C17E4.6 - protein c17e4.6, crh-1 - protein crh-1, nsy-7 - protein nsy-7, nhr-23 - protein nhr-23, nhr-64 - protein nhr-64, sptf-3 - protein sptf-3, irx-1 - protein irx-1, mab-5 - protein mab-5, nhr-85 - protein nhr-85, fos-1 - protein fos-1, mab-3 - protein mab-3, lin-59 - protein lin-59, hbl-1…
GO:1990138	neuron projection extension	9.17e-08	6.33e-06	15.21	7788	36	128	9	[sax-3 - protein sax-3, mig-15 - protein mig-15, unc-130 - protein unc-130, unc-44 - protein unc-44, unc-73 - protein unc-73, unc-5 - protein unc-5, klc-2 - protein klc-2, sem-4 - protein sem-4, trim-9 - protein trim-9]
GO:0048675	axon extension	9.17e-08	6.23e-06	15.21	7788	36	128	9	[sax-3 - protein sax-3, mig-15 - protein mig-15, unc-130 - protein unc-130, unc-44 - protein unc-44, unc-73 - protein unc-73, unc-5 - protein unc-5, klc-2 - protein klc-2, sem-4 - protein sem-4, trim-9 - protein trim-9]
GO:0060560	developmental growth involved in morphogenesis	9.17e-08	6.13e-06	15.21	7788	36	128	9	[sax-3 - protein sax-3, mig-15 - protein mig-15, unc-130 - protein unc-130, unc-44 - protein unc-44, unc-73 - protein unc-73, unc-5 - protein unc-5, klc-2 - protein klc-2, sem-4 - protein sem-4, trim-9 - protein trim-9]
GO:0043401	steroid hormone mediated signaling pathway	9.99e-08	6.57e-06	1.41	7788	188	3812	130	[nhr-61 - protein nhr-61, nhr-14 - protein nhr-14, nhr-3 - protein nhr-3, nhr-86 - protein nhr-86, nhr-243 - protein nhr-243, nhr-112 - protein nhr-112, nhr-68 - protein nhr-68, nhr-104 - protein nhr-104, nhr-59 - protein nhr-59, nhr-74 - protein nhr-74, nhr-23 - protein nhr-23, nhr-17 - protein nhr-17, nhr-47 - protein nhr-47, nhr-7 - protein nhr-7, nhr-64 - protein nhr-64, nhr-56 - protein nhr-…
GO:0051171	regulation of nitrogen compound metabolic process	1.01e-07	6.53e-06	1.58	7788	733	942	140	[nhr-14 - protein nhr-14, lin-39 - protein lin-39, nhr-3 - protein nhr-3, hlh-11 - protein hlh-11, CELE_C17E4.6 - protein c17e4.6, crh-1 - protein crh-1, nsy-7 - protein nsy-7, nhr-23 - protein nhr-23, nhr-64 - protein nhr-64, sptf-3 - protein sptf-3, irx-1 - protein irx-1, mab-5 - protein mab-5, nhr-85 - protein nhr-85, fos-1 - protein fos-1, lin-59 - protein lin-59, mab-3 - protein mab-3, hbl-1…
GO:0048588	developmental cell growth	1.21e-07	7.73e-06	14.8	7788	37	128	9	[sax-3 - protein sax-3, mig-15 - protein mig-15, unc-130 - protein unc-130, unc-44 - protein unc-44, unc-73 - protein unc-73, unc-5 - protein unc-5, klc-2 - protein klc-2, sem-4 - protein sem-4, trim-9 - protein trim-9]
GO:0032535	regulation of cellular component size	1.31e-07	8.26e-06	5.87	7788	35	569	15	[let-607 - protein let-607, add-1 - protein add-1, dbl-1 - protein dbl-1, aqp-2 - protein aqp-2, unc-94 - protein unc-94, eps-8 - protein eps-8, sma-1 - protein sma-1, sma-3 - protein sma-3, tmd-2 - protein tmd-2, lev-11 - protein lev-11, unc-60 - protein unc-60, gsnl-1 - protein gsnl-1, aqp-7 - protein aqp-7, unc-73 - protein unc-73, adt-2 - protein adt-2]
GO:0023051	regulation of signaling	1.5e-07	9.32e-06	1.81	7788	223	1501	78	[Y32H12A.4 - protein y32h12a.4, gpb-2 - protein gpb-2, mig-15 - protein mig-15, egl-10 - protein egl-10, nsy-4 - protein nsy-4, sipa-1 - protein sipa-1, nekl-3 - protein nekl-3, sel-7 - protein sel-7, pde-4 - protein pde-4, irk-1 - protein irk-1, kin-18 - protein kin-18, dbl-1 - protein dbl-1, sel-2 - protein sel-2, sra-13 - protein sra-13, abl-1 - protein abl-1, abts-1 - protein abts-1, cgef-2 -…
GO:0030029	actin filament-based process	1.63e-07	9.98e-06	2.22	7788	156	1102	49	[F47F2.1 - protein f47f2.1, dyc-1 - protein dyc-1, vab-10 - protein vab-10, unc-53 - protein unc-53, unc-27 - protein unc-27, tmd-2 - protein tmd-2, unc-82 - protein unc-82, C02F5.7 - protein c02f5.7, nhr-40 - protein nhr-40, crml-1 - protein crml-1, uig-1 - protein uig-1, cysl-1 - protein cysl-1, erm-1 - protein erm-1, act-1 - protein act-1, lim-9 - protein lim-9, dgk-2 - protein dgk-2, unc-112 …
GO:0032879	regulation of localization	1.79e-07	1.08e-05	2.34	7788	212	739	47	[unc-6 - protein unc-6, daf-9 - protein daf-9, mig-15 - protein mig-15, lon-2 - protein lon-2, magi-1 - protein magi-1, clh-1 - protein clh-1, nsy-4 - protein nsy-4, mig-13 - protein mig-13, cnt-2 - protein cnt-2, cca-1 - protein cca-1, mig-1 - protein mig-1, wip-1 - protein wip-1, blmp-1 - protein blmp-1, abl-1 - protein abl-1, jph-1 - protein jph-1, unc-53 - protein unc-53, egl-27 - protein egl…
GO:0071840	cellular component organization or biogenesis	1.85e-07	1.1e-05	2.32	7788	1036	152	47	[dlg-1 - protein dlg-1, mig-15 - protein mig-15, F47F2.1 - protein f47f2.1, ceh-13 - protein ceh-13, klp-3 - protein klp-3, lin-39 - protein lin-39, mec-8 - protein mec-8, anc-1 - protein anc-1, mec-1 - protein mec-1, unc-5 - protein unc-5, klc-2 - protein klc-2, trim-9 - protein trim-9, unc-94 - protein unc-94, dyc-1 - protein dyc-1, jph-1 - protein jph-1, sgn-1 - protein sgn-1, pat-12 - protein…
GO:0060255	regulation of macromolecule metabolic process	1.9e-07	1.11e-05	2.14	7788	990	210	57	[gmeb-2 - protein gmeb-2, lin-42 - protein lin-42, nhr-14 - protein nhr-14, mig-15 - protein mig-15, lin-39 - protein lin-39, nsy-4 - protein nsy-4, fkh-9 - protein fkh-9, mec-1 - protein mec-1, nhr-32 - protein nhr-32, daf-12 - protein daf-12, nhr-23 - protein nhr-23, hlh-1 - protein hlh-1, egl-27 - protein egl-27, nhr-85 - protein nhr-85, alg-1 - protein alg-1, fox-1 - protein fox-1, hbl-1 - pr…
GO:0010720	positive regulation of cell development	2.12e-07	1.22e-05	11.09	7788	7	702	7	[gsa-1 - protein gsa-1, kin-1 - protein kin-1, unc-53 - protein unc-53, hlh-2 - protein hlh-2, zag-1 - protein zag-1, unc-5 - protein unc-5, unc-73 - protein unc-73]
GO:0016049	cell growth	2.63e-07	1.5e-05	13.69	7788	40	128	9	[sax-3 - protein sax-3, mig-15 - protein mig-15, unc-130 - protein unc-130, unc-44 - protein unc-44, unc-73 - protein unc-73, unc-5 - protein unc-5, klc-2 - protein klc-2, sem-4 - protein sem-4, trim-9 - protein trim-9]
GO:0045138	nematode male tail tip morphogenesis	2.88e-07	1.62e-05	3.63	7788	72	715	24	[mab-31 - protein mab-31, lin-59 - protein lin-59, mab-3 - protein mab-3, unc-6 - protein unc-6, ptr-18 - protein ptr-18, unc-130 - protein unc-130, hlh-2 - protein hlh-2, unc-5 - protein unc-5, dbl-1 - protein dbl-1, efn-4 - protein efn-4, eff-1 - protein eff-1, exc-9 - protein exc-9, rnt-1 - protein rnt-1, ina-1 - protein ina-1, sma-9 - protein sma-9, egl-27 - protein egl-27, lin-41 - protein l…
GO:0009889	regulation of biosynthetic process	3.86e-07	2.14e-05	1.56	7788	715	942	135	[nhr-14 - protein nhr-14, lin-39 - protein lin-39, nhr-3 - protein nhr-3, hlh-11 - protein hlh-11, CELE_C17E4.6 - protein c17e4.6, crh-1 - protein crh-1, nsy-7 - protein nsy-7, nhr-23 - protein nhr-23, nhr-64 - protein nhr-64, sptf-3 - protein sptf-3, irx-1 - protein irx-1, mab-5 - protein mab-5, nhr-85 - protein nhr-85, fos-1 - protein fos-1, mab-3 - protein mab-3, lin-59 - protein lin-59, hbl-1…
GO:0031326	regulation of cellular biosynthetic process	3.86e-07	2.12e-05	1.56	7788	715	942	135	[nhr-14 - protein nhr-14, lin-39 - protein lin-39, nhr-3 - protein nhr-3, hlh-11 - protein hlh-11, CELE_C17E4.6 - protein c17e4.6, crh-1 - protein crh-1, nsy-7 - protein nsy-7, nhr-23 - protein nhr-23, nhr-64 - protein nhr-64, sptf-3 - protein sptf-3, irx-1 - protein irx-1, mab-5 - protein mab-5, nhr-85 - protein nhr-85, fos-1 - protein fos-1, lin-59 - protein lin-59, mab-3 - protein mab-3, hbl-1…
GO:0065008	regulation of biological quality	4.6e-07	2.49e-05	1.47	7788	712	1233	166	[ogt-1 - protein ogt-1, lbp-5 - protein lbp-5, ttr-48 - protein ttr-48, klf-3 - protein klf-3, unc-97 - protein unc-97, CELE_W03A5.4 - protein w03a5.4, C18H2.1 - protein c18h2.1, C07A9.2 - protein c07a9.2, peb-1 - protein peb-1, dnj-27 - protein dnj-27, W03G9.5 - protein w03g9.5, csq-1 - protein csq-1, eps-8 - protein eps-8, K05F1.6 - protein k05f1.6, cng-2 - protein cng-2, nhr-64 - protein nhr-6…
GO:0009966	regulation of signal transduction	4.95e-07	2.64e-05	1.87	7788	184	1495	66	[Y32H12A.4 - protein y32h12a.4, gpb-2 - protein gpb-2, mig-15 - protein mig-15, egl-10 - protein egl-10, nsy-4 - protein nsy-4, sipa-1 - protein sipa-1, nekl-3 - protein nekl-3, sel-7 - protein sel-7, pde-4 - protein pde-4, irk-1 - protein irk-1, kin-18 - protein kin-18, sel-2 - protein sel-2, dbl-1 - protein dbl-1, sra-13 - protein sra-13, abl-1 - protein abl-1, cgef-2 - protein cgef-2, unc-43 -…
GO:2000026	regulation of multicellular organismal development	5.62e-07	2.97e-05	2.1	7788	290	702	55	[die-1 - protein die-1, lin-18 - protein lin-18, lin-42 - protein lin-42, unc-6 - protein unc-6, lin-39 - protein lin-39, pac-1 - protein pac-1, mab-21 - protein mab-21, blmp-1 - protein blmp-1, lin-2 - protein lin-2, eps-8 - protein eps-8, unc-53 - protein unc-53, C48A7.2 - protein c48a7.2, lsy-12 - protein lsy-12, hlh-2 - protein hlh-2, hda-4 - protein hda-4, din-1 - protein din-1, ark-1 - prot…
GO:0009890	negative regulation of biosynthetic process	6.8e-07	3.54e-05	2.63	7788	99	1045	35	[sup-26 - protein sup-26, lin-42 - protein lin-42, flh-2 - protein flh-2, unc-37 - protein unc-37, pek-1 - protein pek-1, sel-7 - protein sel-7, blmp-1 - protein blmp-1, daf-5 - protein daf-5, nsy-7 - protein nsy-7, mab-5 - protein mab-5, atf-7 - protein atf-7, CELE_Y39E4B.6 - protein y39e4b.6, daf-16 - protein daf-16, cfi-1 - protein cfi-1, jun-1 - protein jun-1, mab-3 - protein mab-3, hbl-1 - p…
GO:0031327	negative regulation of cellular biosynthetic process	6.8e-07	3.5e-05	2.63	7788	99	1045	35	[sup-26 - protein sup-26, lin-42 - protein lin-42, flh-2 - protein flh-2, unc-37 - protein unc-37, pek-1 - protein pek-1, sel-7 - protein sel-7, blmp-1 - protein blmp-1, daf-5 - protein daf-5, nsy-7 - protein nsy-7, mab-5 - protein mab-5, atf-7 - protein atf-7, CELE_Y39E4B.6 - protein y39e4b.6, daf-16 - protein daf-16, cfi-1 - protein cfi-1, jun-1 - protein jun-1, mab-3 - protein mab-3, hbl-1 - p…
GO:0006941	striated muscle contraction	7.51e-07	3.82e-05	7.16	7788	21	570	11	[cpna-1 - protein cpna-1, ztf-19 - protein ztf-19, egl-19 - protein egl-19, myo-3 - protein myo-3, pat-12 - protein pat-12, etr-1 - protein etr-1, hlh-1 - protein hlh-1, deb-1 - protein deb-1, lev-11 - protein lev-11, pat-2 - protein pat-2, unc-112 - protein unc-112]
GO:0061199	striated muscle contraction involved in embryonic body morphogenesis	7.51e-07	3.78e-05	7.16	7788	21	570	11	[cpna-1 - protein cpna-1, ztf-19 - protein ztf-19, egl-19 - protein egl-19, myo-3 - protein myo-3, pat-12 - protein pat-12, etr-1 - protein etr-1, hlh-1 - protein hlh-1, deb-1 - protein deb-1, lev-11 - protein lev-11, pat-2 - protein pat-2, unc-112 - protein unc-112]
GO:0048519	negative regulation of biological process	7.7e-07	3.83e-05	1.56	7788	623	1045	130	[die-1 - protein die-1, C44B11.1 - protein c44b11.1, R13A5.7 - protein r13a5.7, lin-39 - protein lin-39, tep-1 - protein tep-1, pde-4 - protein pde-4, cri-2 - protein cri-2, sel-7 - protein sel-7, lin-2 - protein lin-2, CELE_C17E4.6 - protein c17e4.6, dve-1 - protein dve-1, nsy-7 - protein nsy-7, vab-10 - protein vab-10, eps-8 - protein eps-8, tmd-2 - protein tmd-2, mab-5 - protein mab-5, tag-196…
GO:1902531	regulation of intracellular signal transduction	9.57e-07	4.7e-05	4.04	7788	103	393	21	[soc-2 - protein soc-2, mig-15 - protein mig-15, nsy-4 - protein nsy-4, let-607 - protein let-607, pde-4 - protein pde-4, max-2 - protein max-2, uig-1 - protein uig-1, efa-6 - protein efa-6, aak-2 - protein aak-2, ire-1 - protein ire-1, dbl-1 - protein dbl-1, abl-1 - protein abl-1, gsa-1 - protein gsa-1, C01C4.3 - protein c01c4.3, pdi-2 - protein pdi-2, rhgf-1 - protein rhgf-1, vav-1 - protein va…
GO:0045595	regulation of cell differentiation	9.84e-07	4.78e-05	2.5	7788	90	1244	36	[unc-75 - protein unc-75, frk-1 - protein frk-1, ceh-18 - protein ceh-18, lin-39 - protein lin-39, gck-1 - protein gck-1, unc-37 - protein unc-37, sel-7 - protein sel-7, unc-5 - protein unc-5, mex-3 - protein mex-3, gsa-1 - protein gsa-1, mdl-1 - protein mdl-1, jnk-1 - protein jnk-1, unc-53 - protein unc-53, hlh-1 - protein hlh-1, unc-76 - protein unc-76, lin-17 - protein lin-17, mab-5 - protein …
GO:0061061	muscle structure development	1.01e-06	4.87e-05	6.56	7788	27	528	12	[eff-1 - protein eff-1, unc-98 - protein unc-98, egl-15 - protein egl-15, sem-5 - protein sem-5, soc-2 - protein soc-2, sgn-1 - protein sgn-1, ltd-1 - protein ltd-1, hlh-1 - protein hlh-1, unc-97 - protein unc-97, unc-112 - protein unc-112, tbx-2 - protein tbx-2, emb-9 - protein emb-9]
GO:0030334	regulation of cell migration	1.03e-06	4.87e-05	3.51	7788	54	904	22	[unc-6 - protein unc-6, daf-9 - protein daf-9, mig-15 - protein mig-15, vab-8 - protein vab-8, lon-2 - protein lon-2, lrp-1 - protein lrp-1, mig-13 - protein mig-13, mig-1 - protein mig-1, wip-1 - protein wip-1, crml-1 - protein crml-1, mig-10 - protein mig-10, blmp-1 - protein blmp-1, srgp-1 - protein srgp-1, bar-1 - protein bar-1, abl-1 - protein abl-1, unc-53 - protein unc-53, egl-27 - protein…
GO:0048609	multicellular organismal reproductive process	1.03e-06	4.84e-05	2.65	7788	553	186	35	[dlg-1 - protein dlg-1, lin-42 - protein lin-42, mig-15 - protein mig-15, lin-39 - protein lin-39, trim-9 - protein trim-9, abl-1 - protein abl-1, pqn-47 - protein pqn-47, daf-12 - protein daf-12, unc-53 - protein unc-53, pdfr-1 - protein pdfr-1, nhr-23 - protein nhr-23, egl-27 - protein egl-27, lev-11 - protein lev-11, fox-1 - protein fox-1, nhr-25 - protein nhr-25, egl-15 - protein egl-15, kin-…
GO:0007517	muscle organ development	1.05e-06	4.9e-05	8.61	7788	24	377	10	[eff-1 - protein eff-1, egl-15 - protein egl-15, sem-5 - protein sem-5, soc-2 - protein soc-2, sgn-1 - protein sgn-1, hlh-1 - protein hlh-1, unc-97 - protein unc-97, unc-112 - protein unc-112, tbx-2 - protein tbx-2, emb-9 - protein emb-9]
GO:0010556	regulation of macromolecule biosynthetic process	1.48e-06	6.8e-05	2.25	7788	699	228	46	[gmeb-2 - protein gmeb-2, lin-42 - protein lin-42, nhr-14 - protein nhr-14, flh-2 - protein flh-2, lin-39 - protein lin-39, fkh-9 - protein fkh-9, gei-8 - protein gei-8, pek-1 - protein pek-1, nhr-66 - protein nhr-66, nhr-32 - protein nhr-32, madf-4 - protein madf-4, daf-5 - protein daf-5, pqn-47 - protein pqn-47, daf-12 - protein daf-12, nhr-23 - protein nhr-23, hlh-1 - protein hlh-1, egl-27 - p…
GO:0006936	muscle contraction	1.7e-06	7.71e-05	5.73	7788	31	570	13	[ztf-19 - protein ztf-19, egl-19 - protein egl-19, myo-3 - protein myo-3, etr-1 - protein etr-1, unc-54 - protein unc-54, deb-1 - protein deb-1, pat-2 - protein pat-2, cpna-1 - protein cpna-1, jph-1 - protein jph-1, pat-12 - protein pat-12, hlh-1 - protein hlh-1, lev-11 - protein lev-11, unc-112 - protein unc-112]
GO:0003012	muscle system process	1.7e-06	7.63e-05	5.73	7788	31	570	13	[ztf-19 - protein ztf-19, egl-19 - protein egl-19, myo-3 - protein myo-3, etr-1 - protein etr-1, unc-54 - protein unc-54, deb-1 - protein deb-1, pat-2 - protein pat-2, cpna-1 - protein cpna-1, jph-1 - protein jph-1, pat-12 - protein pat-12, hlh-1 - protein hlh-1, lev-11 - protein lev-11, unc-112 - protein unc-112]
GO:2000112	regulation of cellular macromolecule biosynthetic process	1.88e-06	8.37e-05	1.54	7788	693	942	129	[nhr-14 - protein nhr-14, lin-39 - protein lin-39, nhr-3 - protein nhr-3, hlh-11 - protein hlh-11, CELE_C17E4.6 - protein c17e4.6, crh-1 - protein crh-1, nsy-7 - protein nsy-7, nhr-23 - protein nhr-23, nhr-64 - protein nhr-64, sptf-3 - protein sptf-3, irx-1 - protein irx-1, mab-5 - protein mab-5, nhr-85 - protein nhr-85, fos-1 - protein fos-1, lin-59 - protein lin-59, mab-3 - protein mab-3, hbl-1…
GO:0006357	regulation of transcription from RNA polymerase II promoter	1.92e-06	8.46e-05	2.4	7788	234	541	39	[lin-42 - protein lin-42, K02D7.2 - protein k02d7.2, fkh-9 - protein fkh-9, ire-1 - protein ire-1, madf-4 - protein madf-4, dbl-1 - protein dbl-1, blmp-1 - protein blmp-1, daf-5 - protein daf-5, crh-1 - protein crh-1, daf-12 - protein daf-12, egl-27 - protein egl-27, hlh-1 - protein hlh-1, fkh-7 - protein fkh-7, tag-97 - protein tag-97, CELE_Y39E4B.6 - protein y39e4b.6, daf-16 - protein daf-16, m…
GO:0048589	developmental growth	2.12e-06	9.25e-05	10.95	7788	50	128	9	[sax-3 - protein sax-3, mig-15 - protein mig-15, unc-130 - protein unc-130, unc-44 - protein unc-44, unc-73 - protein unc-73, unc-5 - protein unc-5, klc-2 - protein klc-2, trim-9 - protein trim-9, sem-4 - protein sem-4]
GO:2000145	regulation of cell motility	2.2e-06	9.49e-05	3.38	7788	56	904	22	[unc-6 - protein unc-6, daf-9 - protein daf-9, mig-15 - protein mig-15, vab-8 - protein vab-8, lon-2 - protein lon-2, lrp-1 - protein lrp-1, mig-13 - protein mig-13, mig-1 - protein mig-1, wip-1 - protein wip-1, crml-1 - protein crml-1, mig-10 - protein mig-10, blmp-1 - protein blmp-1, srgp-1 - protein srgp-1, bar-1 - protein bar-1, abl-1 - protein abl-1, unc-53 - protein unc-53, egl-27 - protein…
GO:0010468	regulation of gene expression	2.3e-06	9.84e-05	2.13	7788	829	221	50	[nhr-14 - protein nhr-14, lin-42 - protein lin-42, lin-39 - protein lin-39, fkh-9 - protein fkh-9, nhr-32 - protein nhr-32, daf-12 - protein daf-12, nhr-23 - protein nhr-23, egl-27 - protein egl-27, hlh-1 - protein hlh-1, nhr-85 - protein nhr-85, alg-1 - protein alg-1, fox-1 - protein fox-1, hbl-1 - protein hbl-1, dmd-6 - protein dmd-6, nhr-40 - protein nhr-40, hlh-2 - protein hlh-2, let-607 - pr…
GO:0051172	negative regulation of nitrogen compound metabolic process	2.71e-06	0.000115	2.51	7788	104	1045	35	[sup-26 - protein sup-26, lin-42 - protein lin-42, flh-2 - protein flh-2, lin-28 - protein lin-28, unc-37 - protein unc-37, pek-1 - protein pek-1, sel-7 - protein sel-7, blmp-1 - protein blmp-1, daf-5 - protein daf-5, nsy-7 - protein nsy-7, mab-5 - protein mab-5, atf-7 - protein atf-7, CELE_Y39E4B.6 - protein y39e4b.6, daf-16 - protein daf-16, cfi-1 - protein cfi-1, jun-1 - protein jun-1, mab-3 -…
GO:0010558	negative regulation of macromolecule biosynthetic process	2.97e-06	0.000124	2.62	7788	91	1045	32	[sup-26 - protein sup-26, lin-42 - protein lin-42, flh-2 - protein flh-2, unc-37 - protein unc-37, pek-1 - protein pek-1, sel-7 - protein sel-7, blmp-1 - protein blmp-1, daf-5 - protein daf-5, nsy-7 - protein nsy-7, mab-5 - protein mab-5, atf-7 - protein atf-7, CELE_Y39E4B.6 - protein y39e4b.6, cfi-1 - protein cfi-1, daf-16 - protein daf-16, mab-3 - protein mab-3, jun-1 - protein jun-1, hbl-1 - p…
GO:2000113	negative regulation of cellular macromolecule biosynthetic process	2.97e-06	0.000123	2.62	7788	91	1045	32	[sup-26 - protein sup-26, lin-42 - protein lin-42, flh-2 - protein flh-2, unc-37 - protein unc-37, pek-1 - protein pek-1, sel-7 - protein sel-7, blmp-1 - protein blmp-1, daf-5 - protein daf-5, nsy-7 - protein nsy-7, mab-5 - protein mab-5, atf-7 - protein atf-7, CELE_Y39E4B.6 - protein y39e4b.6, cfi-1 - protein cfi-1, daf-16 - protein daf-16, mab-3 - protein mab-3, jun-1 - protein jun-1, hbl-1 - p…
GO:0051253	negative regulation of RNA metabolic process	3.17e-06	0.00013	2.84	7788	79	973	28	[lin-42 - protein lin-42, flh-2 - protein flh-2, lin-28 - protein lin-28, unc-37 - protein unc-37, sel-7 - protein sel-7, blmp-1 - protein blmp-1, daf-5 - protein daf-5, nsy-7 - protein nsy-7, mab-5 - protein mab-5, CELE_Y39E4B.6 - protein y39e4b.6, cfi-1 - protein cfi-1, daf-16 - protein daf-16, mab-3 - protein mab-3, jun-1 - protein jun-1, hbl-1 - protein hbl-1, atf-2 - protein atf-2, elt-1 - p…
GO:0045934	negative regulation of nucleobase-containing compound metabolic process	3.59e-06	0.000146	2.67	7788	93	973	31	[lin-42 - protein lin-42, flh-2 - protein flh-2, lin-28 - protein lin-28, unc-37 - protein unc-37, sel-7 - protein sel-7, blmp-1 - protein blmp-1, daf-5 - protein daf-5, nsy-7 - protein nsy-7, mab-5 - protein mab-5, CELE_Y39E4B.6 - protein y39e4b.6, cfi-1 - protein cfi-1, daf-16 - protein daf-16, mab-3 - protein mab-3, jun-1 - protein jun-1, hbl-1 - protein hbl-1, atf-2 - protein atf-2, elt-1 - p…
GO:0010770	positive regulation of cell morphogenesis involved in differentiation	3.77e-06	0.000152	106.2	7788	4	55	3	[unc-53 - protein unc-53, unc-73 - protein unc-73, unc-5 - protein unc-5]
GO:0010976	positive regulation of neuron projection development	3.77e-06	0.000151	106.2	7788	4	55	3	[unc-53 - protein unc-53, unc-73 - protein unc-73, unc-5 - protein unc-5]
GO:0045773	positive regulation of axon extension	3.77e-06	0.000149	106.2	7788	4	55	3	[unc-53 - protein unc-53, unc-73 - protein unc-73, unc-5 - protein unc-5]
GO:0050772	positive regulation of axonogenesis	3.77e-06	0.000148	106.2	7788	4	55	3	[unc-53 - protein unc-53, unc-5 - protein unc-5, unc-73 - protein unc-73]
GO:0031346	positive regulation of cell projection organization	3.77e-06	0.000147	106.2	7788	4	55	3	[unc-53 - protein unc-53, unc-5 - protein unc-5, unc-73 - protein unc-73]
GO:0007167	enzyme linked receptor protein signaling pathway	3.92e-06	0.000151	2.91	7788	83	870	27	[mab-31 - protein mab-31, akt-2 - protein akt-2, src-2 - protein src-2, efn-4 - protein efn-4, dbl-1 - protein dbl-1, abl-1 - protein abl-1, tag-68 - protein tag-68, ipp-5 - protein ipp-5, cam-1 - protein cam-1, F36H9.2 - protein f36h9.2, rgl-1 - protein rgl-1, sma-3 - protein sma-3, vab-1 - protein vab-1, pkc-1 - protein pkc-1, Y43C5B.2 - protein y43c5b.2, shc-1 - protein shc-1, daf-16 - protein…
GO:0048585	negative regulation of response to stimulus	3.99e-06	0.000152	2.53	7788	92	1104	33	[egl-10 - protein egl-10, lon-2 - protein lon-2, nsy-4 - protein nsy-4, lin-28 - protein lin-28, gck-1 - protein gck-1, pde-4 - protein pde-4, sel-2 - protein sel-2, grk-2 - protein grk-2, abl-1 - protein abl-1, gsa-1 - protein gsa-1, jnk-1 - protein jnk-1, pkc-1 - protein pkc-1, kin-2 - protein kin-2, atf-7 - protein atf-7, vhp-1 - protein vhp-1, grk-1 - protein grk-1, rhy-1 - protein rhy-1, let…
GO:0065009	regulation of molecular function	5.05e-06	0.000191	1.45	7788	261	2517	122	[Y32H12A.4 - protein y32h12a.4, gap-1 - protein gap-1, CELE_ZC84.1 - protein zc84.1, C08G9.2 - protein c08g9.2, tep-1 - protein tep-1, sipa-1 - protein sipa-1, cri-2 - protein cri-2, srp-7 - protein srp-7, cki-1 - protein cki-1, ags-3 - protein ags-3, Y34B4A.4 - protein y34b4a.4, jkk-1 - protein jkk-1, shc-1 - protein shc-1, E01G6.1 - protein e01g6.1, T01D3.3 - protein t01d3.3, tag-196 - protein …
GO:0050790	regulation of catalytic activity	5.06e-06	0.00019	1.45	7788	251	2517	118	[Y32H12A.4 - protein y32h12a.4, gap-1 - protein gap-1, CELE_ZC84.1 - protein zc84.1, C08G9.2 - protein c08g9.2, tep-1 - protein tep-1, sipa-1 - protein sipa-1, cri-2 - protein cri-2, srp-7 - protein srp-7, cki-1 - protein cki-1, ags-3 - protein ags-3, Y34B4A.4 - protein y34b4a.4, jkk-1 - protein jkk-1, shc-1 - protein shc-1, E01G6.1 - protein e01g6.1, T01D3.3 - protein t01d3.3, tag-196 - protein …
GO:0033563	dorsal/ventral axon guidance	5.48e-06	0.000204	13.11	7788	18	231	7	[unc-6 - protein unc-6, sax-3 - protein sax-3, mig-15 - protein mig-15, unc-44 - protein unc-44, unc-5 - protein unc-5, tag-333 - protein tag-333, trim-9 - protein trim-9]
GO:0016310	phosphorylation	6.08e-06	0.000224	2.01	7788	401	511	53	[pkn-1 - protein pkn-1, lin-18 - protein lin-18, dlg-1 - protein dlg-1, mig-15 - protein mig-15, F47F2.1 - protein f47f2.1, lin-2 - protein lin-2, mvk-1 - protein mvk-1, abl-1 - protein abl-1, sma-5 - protein sma-5, vab-1 - protein vab-1, Y48G8AL.15 - protein y48g8al.15, unc-43 - protein unc-43, unc-82 - protein unc-82, grk-1 - protein grk-1, K08F8.1 - protein k08f8.1, akt-1 - protein akt-1, ark-…
GO:1902679	negative regulation of RNA biosynthetic process	6.54e-06	0.000239	2.81	7788	77	973	27	[lin-42 - protein lin-42, flh-2 - protein flh-2, unc-37 - protein unc-37, sel-7 - protein sel-7, blmp-1 - protein blmp-1, daf-5 - protein daf-5, nsy-7 - protein nsy-7, mab-5 - protein mab-5, CELE_Y39E4B.6 - protein y39e4b.6, cfi-1 - protein cfi-1, daf-16 - protein daf-16, mab-3 - protein mab-3, jun-1 - protein jun-1, hbl-1 - protein hbl-1, atf-2 - protein atf-2, elt-1 - protein elt-1, mef-2 - pro…
GO:0045892	negative regulation of transcription, DNA-templated	6.54e-06	0.000237	2.81	7788	77	973	27	[lin-42 - protein lin-42, flh-2 - protein flh-2, unc-37 - protein unc-37, sel-7 - protein sel-7, blmp-1 - protein blmp-1, daf-5 - protein daf-5, nsy-7 - protein nsy-7, mab-5 - protein mab-5, CELE_Y39E4B.6 - protein y39e4b.6, cfi-1 - protein cfi-1, daf-16 - protein daf-16, mab-3 - protein mab-3, jun-1 - protein jun-1, hbl-1 - protein hbl-1, atf-2 - protein atf-2, elt-1 - protein elt-1, mef-2 - pro…
GO:1903507	negative regulation of nucleic acid-templated transcription	6.54e-06	0.000235	2.81	7788	77	973	27	[lin-42 - protein lin-42, flh-2 - protein flh-2, unc-37 - protein unc-37, sel-7 - protein sel-7, blmp-1 - protein blmp-1, daf-5 - protein daf-5, nsy-7 - protein nsy-7, mab-5 - protein mab-5, CELE_Y39E4B.6 - protein y39e4b.6, cfi-1 - protein cfi-1, daf-16 - protein daf-16, mab-3 - protein mab-3, jun-1 - protein jun-1, hbl-1 - protein hbl-1, atf-2 - protein atf-2, elt-1 - protein elt-1, mef-2 - pro…
GO:0006468	protein phosphorylation	7.76e-06	0.000277	2.16	7788	310	511	44	[lin-18 - protein lin-18, pkn-1 - protein pkn-1, R90.1 - protein r90.1, mig-15 - protein mig-15, F47F2.1 - protein f47f2.1, mpk-1 - protein mpk-1, pek-1 - protein pek-1, mnk-1 - protein mnk-1, ire-1 - protein ire-1, lin-2 - protein lin-2, Y106G6A.1 - protein y106g6a.1, abl-1 - protein abl-1, sma-5 - protein sma-5, cam-1 - protein cam-1, ckk-1 - protein ckk-1, ddr-2 - protein ddr-2, vab-1 - protei…
GO:0030030	cell projection organization	8.39e-06	0.000296	54.65	7788	95	6	4	[unc-53 - protein unc-53, mig-15 - protein mig-15, vab-1 - protein vab-1, trim-9 - protein trim-9]
GO:0045666	positive regulation of neuron differentiation	8.45e-06	0.000296	30.39	7788	5	205	4	[unc-53 - protein unc-53, hlh-2 - protein hlh-2, unc-5 - protein unc-5, unc-73 - protein unc-73]
GO:0050769	positive regulation of neurogenesis	8.45e-06	0.000294	30.39	7788	5	205	4	[unc-53 - protein unc-53, hlh-2 - protein hlh-2, unc-73 - protein unc-73, unc-5 - protein unc-5]
GO:0060179	male mating behavior	8.56e-06	0.000295	10.92	7788	35	163	8	[daf-12 - protein daf-12, egl-19 - protein egl-19, pdfr-1 - protein pdfr-1, tax-6 - protein tax-6, lin-39 - protein lin-39, lev-11 - protein lev-11, daf-19 - protein daf-19, trim-9 - protein trim-9]
GO:0060284	regulation of cell development	9.05e-06	0.00031	2.86	7788	54	1211	24	[unc-75 - protein unc-75, kin-1 - protein kin-1, unc-116 - protein unc-116, ceh-18 - protein ceh-18, gck-1 - protein gck-1, unc-37 - protein unc-37, hlh-2 - protein hlh-2, zag-1 - protein zag-1, hda-4 - protein hda-4, max-2 - protein max-2, crml-1 - protein crml-1, unc-5 - protein unc-5, ZK757.2 - protein zk757.2, gsa-1 - protein gsa-1, ham-2 - protein ham-2, jnk-1 - protein jnk-1, let-756 - prot…
GO:0006351	transcription, DNA-templated	1.1e-05	0.000374	3.44	7788	444	102	20	[nhr-25 - protein nhr-25, hbl-1 - protein hbl-1, lin-42 - protein lin-42, nhr-14 - protein nhr-14, nhr-21 - protein nhr-21, hlh-30 - protein hlh-30, nhr-40 - protein nhr-40, unc-130 - protein unc-130, nhr-66 - protein nhr-66, lin-14 - protein lin-14, daf-12 - protein daf-12, nhr-23 - protein nhr-23, hlh-1 - protein hlh-1, egl-27 - protein egl-27, fkh-7 - protein fkh-7, nhr-85 - protein nhr-85, ta…
GO:0030835	negative regulation of actin filament depolymerization	1.16e-05	0.000392	11.36	7788	8	514	6	[unc-94 - protein unc-94, eps-8 - protein eps-8, tmd-2 - protein tmd-2, gsnl-1 - protein gsnl-1, lev-11 - protein lev-11, add-1 - protein add-1]
GO:0048858	cell projection morphogenesis	1.17e-05	0.00039	144.22	7788	27	6	3	[unc-53 - protein unc-53, mig-15 - protein mig-15, vab-1 - protein vab-1]
GO:0002164	larval development	1.17e-05	0.000389	1.82	7788	1459	179	61	[dlg-1 - protein dlg-1, mig-15 - protein mig-15, ceh-13 - protein ceh-13, anc-1 - protein anc-1, mec-8 - protein mec-8, dpy-10 - protein dpy-10, klc-2 - protein klc-2, mvk-1 - protein mvk-1, C07A9.2 - protein c07a9.2, daf-12 - protein daf-12, eps-8 - protein eps-8, nhr-23 - protein nhr-23, hlh-1 - protein hlh-1, egl-27 - protein egl-27, vab-1 - protein vab-1, alg-1 - protein alg-1, let-2 - protei…
GO:0097659	nucleic acid-templated transcription	1.25e-05	0.000411	3.41	7788	448	102	20	[nhr-25 - protein nhr-25, hbl-1 - protein hbl-1, lin-42 - protein lin-42, nhr-14 - protein nhr-14, nhr-21 - protein nhr-21, hlh-30 - protein hlh-30, nhr-40 - protein nhr-40, unc-130 - protein unc-130, nhr-66 - protein nhr-66, lin-14 - protein lin-14, daf-12 - protein daf-12, nhr-23 - protein nhr-23, hlh-1 - protein hlh-1, egl-27 - protein egl-27, fkh-7 - protein fkh-7, nhr-85 - protein nhr-85, ta…
GO:0051270	regulation of cellular component movement	1.27e-05	0.000414	3.11	7788	61	904	22	[unc-6 - protein unc-6, daf-9 - protein daf-9, mig-15 - protein mig-15, vab-8 - protein vab-8, lon-2 - protein lon-2, lrp-1 - protein lrp-1, mig-13 - protein mig-13, mig-1 - protein mig-1, wip-1 - protein wip-1, crml-1 - protein crml-1, mig-10 - protein mig-10, blmp-1 - protein blmp-1, srgp-1 - protein srgp-1, bar-1 - protein bar-1, abl-1 - protein abl-1, unc-53 - protein unc-53, egl-27 - protein…
GO:0030307	positive regulation of cell growth	1.27e-05	0.000412	84.96	7788	5	55	3	[unc-53 - protein unc-53, unc-5 - protein unc-5, unc-73 - protein unc-73]
GO:0000165	MAPK cascade	1.28e-05	0.000411	3.08	7788	24	1792	17	[mek-1 - protein mek-1, mig-15 - protein mig-15, mpk-1 - protein mpk-1, nipi-3 - protein nipi-3, K08F8.1 - protein k08f8.1, max-2 - protein max-2, kin-18 - protein kin-18, sek-1 - protein sek-1, pmk-1 - protein pmk-1, jnk-1 - protein jnk-1, mkk-4 - protein mkk-4, CELE_W09H1.1 - protein w09h1.1, mlk-1 - protein mlk-1, mig-2 - protein mig-2, pkc-1 - protein pkc-1, lit-1 - protein lit-1, unc-43 - pr…
GO:0009791	post-embryonic development	1.43e-05	0.000456	1.81	7788	1469	179	61	[dlg-1 - protein dlg-1, mig-15 - protein mig-15, ceh-13 - protein ceh-13, anc-1 - protein anc-1, mec-8 - protein mec-8, dpy-10 - protein dpy-10, klc-2 - protein klc-2, mvk-1 - protein mvk-1, C07A9.2 - protein c07a9.2, daf-12 - protein daf-12, eps-8 - protein eps-8, nhr-23 - protein nhr-23, hlh-1 - protein hlh-1, egl-27 - protein egl-27, vab-1 - protein vab-1, alg-1 - protein alg-1, let-2 - protei…
GO:0032990	cell part morphogenesis	1.7e-05	0.000539	129.8	7788	30	6	3	[unc-53 - protein unc-53, mig-15 - protein mig-15, vab-1 - protein vab-1]
GO:0048522	positive regulation of cellular process	1.79e-05	0.000561	1.55	7788	355	1384	98	[skr-1 - protein skr-1, ces-2 - protein ces-2, sel-7 - protein sel-7, his-24 - protein his-24, cdk-2 - protein cdk-2, lpin-1 - protein lpin-1, crh-1 - protein crh-1, jph-1 - protein jph-1, sptf-3 - protein sptf-3, mab-5 - protein mab-5, shc-1 - protein shc-1, fos-1 - protein fos-1, lin-59 - protein lin-59, aex-3 - protein aex-3, elt-1 - protein elt-1, hlh-2 - protein hlh-2, epn-1 - protein epn-1,…
GO:0009893	positive regulation of metabolic process	2e-05	0.000624	1.78	7788	303	926	64	[ced-3 - protein ced-3, mig-15 - protein mig-15, egl-10 - protein egl-10, lin-28 - protein lin-28, pac-1 - protein pac-1, cnt-2 - protein cnt-2, kin-18 - protein kin-18, dbl-1 - protein dbl-1, crh-1 - protein crh-1, daf-12 - protein daf-12, cgef-2 - protein cgef-2, hlh-1 - protein hlh-1, sptf-3 - protein sptf-3, mab-5 - protein mab-5, shc-1 - protein shc-1, cfi-1 - protein cfi-1, fos-1 - protein …
GO:0003008	system process	2.02e-05	0.000624	1.86	7788	209	1081	54	[srg-55 - protein srg-55, lat-1 - protein lat-1, mec-8 - protein mec-8, unc-97 - protein unc-97, peb-1 - protein peb-1, lin-25 - protein lin-25, jph-1 - protein jph-1, sgn-1 - protein sgn-1, hlh-1 - protein hlh-1, unc-27 - protein unc-27, hid-1 - protein hid-1, unc-43 - protein unc-43, ztf-19 - protein ztf-19, myo-3 - protein myo-3, odr-2 - protein odr-2, egl-19 - protein egl-19, srg-7 - protein …
GO:0032774	RNA biosynthetic process	2.02e-05	0.000622	3.3	7788	463	102	20	[nhr-25 - protein nhr-25, hbl-1 - protein hbl-1, lin-42 - protein lin-42, nhr-14 - protein nhr-14, nhr-21 - protein nhr-21, hlh-30 - protein hlh-30, nhr-40 - protein nhr-40, unc-130 - protein unc-130, nhr-66 - protein nhr-66, lin-14 - protein lin-14, daf-12 - protein daf-12, nhr-23 - protein nhr-23, hlh-1 - protein hlh-1, egl-27 - protein egl-27, fkh-7 - protein fkh-7, nhr-85 - protein nhr-85, ta…
GO:0051960	regulation of nervous system development	2.22e-05	0.000678	3.48	7788	49	821	18	[unc-75 - protein unc-75, unc-6 - protein unc-6, unc-37 - protein unc-37, hlh-2 - protein hlh-2, zag-1 - protein zag-1, hda-4 - protein hda-4, max-2 - protein max-2, crml-1 - protein crml-1, unc-5 - protein unc-5, ham-2 - protein ham-2, jnk-1 - protein jnk-1, unc-53 - protein unc-53, unc-76 - protein unc-76, C01C4.3 - protein c01c4.3, sad-1 - protein sad-1, lin-17 - protein lin-17, unc-73 - prote…
GO:0002119	nematode larval development	2.36e-05	0.000717	1.79	7788	1458	179	60	[dlg-1 - protein dlg-1, mig-15 - protein mig-15, ceh-13 - protein ceh-13, anc-1 - protein anc-1, mec-8 - protein mec-8, dpy-10 - protein dpy-10, klc-2 - protein klc-2, mvk-1 - protein mvk-1, C07A9.2 - protein c07a9.2, daf-12 - protein daf-12, eps-8 - protein eps-8, nhr-23 - protein nhr-23, hlh-1 - protein hlh-1, egl-27 - protein egl-27, vab-1 - protein vab-1, alg-1 - protein alg-1, let-2 - protei…
GO:0043053	dauer entry	2.6e-05	0.000784	5.11	7788	35	523	12	[daf-12 - protein daf-12, che-14 - protein che-14, daf-9 - protein daf-9, hmr-1 - protein hmr-1, nhr-85 - protein nhr-85, mec-8 - protein mec-8, daf-2 - protein daf-2, ftt-2 - protein ftt-2, mec-1 - protein mec-1, daf-19 - protein daf-19, daf-16 - protein daf-16, blmp-1 - protein blmp-1]
GO:0055115	entry into diapause	2.6e-05	0.000778	5.11	7788	35	523	12	[daf-12 - protein daf-12, che-14 - protein che-14, daf-9 - protein daf-9, hmr-1 - protein hmr-1, nhr-85 - protein nhr-85, mec-8 - protein mec-8, ftt-2 - protein ftt-2, daf-2 - protein daf-2, mec-1 - protein mec-1, daf-19 - protein daf-19, daf-16 - protein daf-16, blmp-1 - protein blmp-1]
GO:0051962	positive regulation of nervous system development	2.93e-05	0.000869	70.8	7788	6	55	3	[unc-53 - protein unc-53, unc-5 - protein unc-5, unc-73 - protein unc-73]
GO:0009968	negative regulation of signal transduction	3.05e-05	0.000899	2.53	7788	78	1104	28	[egl-10 - protein egl-10, lon-2 - protein lon-2, nsy-4 - protein nsy-4, gck-1 - protein gck-1, pde-4 - protein pde-4, sel-2 - protein sel-2, grk-2 - protein grk-2, abl-1 - protein abl-1, gsa-1 - protein gsa-1, kin-2 - protein kin-2, vhp-1 - protein vhp-1, grk-1 - protein grk-1, let-607 - protein let-607, crml-1 - protein crml-1, ark-1 - protein ark-1, chd-3 - protein chd-3, aak-2 - protein aak-2,…
GO:0030834	regulation of actin filament depolymerization	3.2e-05	0.000937	16.51	7788	9	262	5	[unc-94 - protein unc-94, eps-8 - protein eps-8, lev-11 - protein lev-11, gsnl-1 - protein gsnl-1, add-1 - protein add-1]
GO:0018996	molting cycle, collagen and cuticulin-based cuticle	3.2e-05	0.000931	2.11	7788	242	610	40	[daf-9 - protein daf-9, noah-1 - protein noah-1, ptr-18 - protein ptr-18, anc-1 - protein anc-1, mlt-8 - protein mlt-8, mlt-9 - protein mlt-9, lir-1 - protein lir-1, ptr-11 - protein ptr-11, pan-1 - protein pan-1, pqn-47 - protein pqn-47, pat-12 - protein pat-12, nhr-23 - protein nhr-23, ifb-1 - protein ifb-1, lev-11 - protein lev-11, alg-1 - protein alg-1, cuti-1 - protein cuti-1, nhr-25 - prote…
GO:0042303	molting cycle	3.2e-05	0.000925	2.11	7788	242	610	40	[daf-9 - protein daf-9, noah-1 - protein noah-1, ptr-18 - protein ptr-18, anc-1 - protein anc-1, mlt-8 - protein mlt-8, mlt-9 - protein mlt-9, lir-1 - protein lir-1, ptr-11 - protein ptr-11, pan-1 - protein pan-1, pqn-47 - protein pqn-47, pat-12 - protein pat-12, nhr-23 - protein nhr-23, ifb-1 - protein ifb-1, lev-11 - protein lev-11, alg-1 - protein alg-1, cuti-1 - protein cuti-1, nhr-25 - prote…
GO:0023014	signal transduction by protein phosphorylation	3.24e-05	0.000929	2.72	7788	32	1792	20	[mek-1 - protein mek-1, mig-15 - protein mig-15, mpk-1 - protein mpk-1, nipi-3 - protein nipi-3, K08F8.1 - protein k08f8.1, max-2 - protein max-2, kin-18 - protein kin-18, sek-1 - protein sek-1, pmk-1 - protein pmk-1, T07F12.4 - protein t07f12.4, daf-4 - protein daf-4, jnk-1 - protein jnk-1, CELE_W09H1.1 - protein w09h1.1, mkk-4 - protein mkk-4, mlk-1 - protein mlk-1, mig-2 - protein mig-2, vab-1…
GO:0040034	regulation of development, heterochronic	3.53e-05	0.00101	98.17	7788	17	14	3	[daf-12 - protein daf-12, lin-42 - protein lin-42, hbl-1 - protein hbl-1]
GO:0002064	epithelial cell development	3.76e-05	0.00106	6.42	7788	8	1061	7	[exc-9 - protein exc-9, sma-1 - protein sma-1, let-653 - protein let-653, let-4 - protein let-4, exc-4 - protein exc-4, exc-7 - protein exc-7, exc-5 - protein exc-5]
GO:0032989	cellular component morphogenesis	3.86e-05	0.00108	102.47	7788	38	6	3	[unc-53 - protein unc-53, mig-15 - protein mig-15, vab-1 - protein vab-1]
GO:0040039	inductive cell migration	5.02e-05	0.0014	6.77	7788	115	100	10	[nhr-25 - protein nhr-25, cyd-1 - protein cyd-1, mig-15 - protein mig-15, noca-1 - protein noca-1, vab-1 - protein vab-1, efn-2 - protein efn-2, let-2 - protein let-2, unc-73 - protein unc-73, emb-9 - protein emb-9, sdn-1 - protein sdn-1]
GO:0035556	intracellular signal transduction	5.23e-05	0.00145	1.78	7788	228	1073	56	[mig-15 - protein mig-15, egl-10 - protein egl-10, cnt-2 - protein cnt-2, pac-1 - protein pac-1, kin-18 - protein kin-18, crh-1 - protein crh-1, eor-2 - protein eor-2, unc-43 - protein unc-43, tol-1 - protein tol-1, W02B8.2 - protein w02b8.2, F46H5.4 - protein f46h5.4, K08F8.1 - protein k08f8.1, akt-1 - protein akt-1, hda-4 - protein hda-4, bar-1 - protein bar-1, rskn-2 - protein rskn-2, egl-44 -…
GO:0010648	negative regulation of cell communication	5.23e-05	0.00144	2.47	7788	80	1104	28	[egl-10 - protein egl-10, lon-2 - protein lon-2, nsy-4 - protein nsy-4, gck-1 - protein gck-1, pde-4 - protein pde-4, sel-2 - protein sel-2, grk-2 - protein grk-2, abl-1 - protein abl-1, gsa-1 - protein gsa-1, kin-2 - protein kin-2, vhp-1 - protein vhp-1, grk-1 - protein grk-1, let-607 - protein let-607, crml-1 - protein crml-1, ark-1 - protein ark-1, chd-3 - protein chd-3, aak-2 - protein aak-2,…
GO:0023057	negative regulation of signaling	5.23e-05	0.00143	2.47	7788	80	1104	28	[egl-10 - protein egl-10, lon-2 - protein lon-2, nsy-4 - protein nsy-4, gck-1 - protein gck-1, pde-4 - protein pde-4, sel-2 - protein sel-2, grk-2 - protein grk-2, abl-1 - protein abl-1, gsa-1 - protein gsa-1, kin-2 - protein kin-2, vhp-1 - protein vhp-1, grk-1 - protein grk-1, let-607 - protein let-607, crml-1 - protein crml-1, ark-1 - protein ark-1, chd-3 - protein chd-3, aak-2 - protein aak-2,…
GO:0030036	actin cytoskeleton organization	5.79e-05	0.00158	2.04	7788	149	1102	43	[frl-1 - protein frl-1, unc-23 - protein unc-23, CELE_C33D9.13 - protein c33d9.13, F47F2.1 - protein f47f2.1, ric-7 - protein ric-7, pak-2 - protein pak-2, wip-1 - protein wip-1, unc-87 - protein unc-87, src-2 - protein src-2, unc-94 - protein unc-94, dyc-1 - protein dyc-1, unc-53 - protein unc-53, vab-10 - protein vab-10, CELE_Y105C5A.1268 - protein y105c5a.1268, unc-27 - protein unc-27, tmd-2 -…
GO:0030833	regulation of actin filament polymerization	5.92e-05	0.0016	7.13	7788	17	514	8	[unc-94 - protein unc-94, eps-8 - protein eps-8, tmd-2 - protein tmd-2, unc-60 - protein unc-60, gsnl-1 - protein gsnl-1, lev-11 - protein lev-11, unc-73 - protein unc-73, add-1 - protein add-1]
GO:0051129	negative regulation of cellular component organization	6.38e-05	0.00172	6.19	7788	48	262	10	[unc-94 - protein unc-94, abl-1 - protein abl-1, unc-6 - protein unc-6, eps-8 - protein eps-8, ppfr-1 - protein ppfr-1, gsnl-1 - protein gsnl-1, lev-11 - protein lev-11, lin-17 - protein lin-17, srgp-1 - protein srgp-1, add-1 - protein add-1]
GO:0023052	signaling	6.84e-05	0.00183	1.92	7788	78	2078	40	[unc-75 - protein unc-75, dlg-1 - protein dlg-1, dgk-1 - protein dgk-1, lin-12 - protein lin-12, unc-18 - protein unc-18, daf-9 - protein daf-9, glr-6 - protein glr-6, rpy-1 - protein rpy-1, unc-37 - protein unc-37, nud-2 - protein nud-2, sel-7 - protein sel-7, CELE_W03A5.4 - protein w03a5.4, unc-38 - protein unc-38, sek-1 - protein sek-1, dbl-1 - protein dbl-1, glr-1 - protein glr-1, rab-3 - pro…
GO:0050795	regulation of behavior	7.06e-05	0.00187	1.63	7788	87	3015	55	[itr-1 - protein itr-1, gpb-2 - protein gpb-2, egl-30 - protein egl-30, egl-10 - protein egl-10, nhx-2 - protein nhx-2, irk-1 - protein irk-1, kin-18 - protein kin-18, gar-3 - protein gar-3, dyc-1 - protein dyc-1, rab-3 - protein rab-3, daf-12 - protein daf-12, ags-3 - protein ags-3, phb-1 - protein phb-1, che-1 - protein che-1, aff-1 - protein aff-1, slt-1 - protein slt-1, T19D7.4 - protein t19d…
GO:0051128	regulation of cellular component organization	7.24e-05	0.00191	2.51	7788	311	269	27	[unc-6 - protein unc-6, cnt-2 - protein cnt-2, pek-1 - protein pek-1, unc-5 - protein unc-5, dbl-1 - protein dbl-1, add-1 - protein add-1, unc-94 - protein unc-94, abl-1 - protein abl-1, sem-5 - protein sem-5, jph-1 - protein jph-1, eps-8 - protein eps-8, unc-53 - protein unc-53, hlh-1 - protein hlh-1, lev-11 - protein lev-11, lin-17 - protein lin-17, kin-20 - protein kin-20, egl-15 - protein egl…
GO:0031667	response to nutrient levels	7.91e-05	0.00207	3.18	7788	38	1096	17	[lgg-2 - protein lgg-2, dgk-1 - protein dgk-1, pcm-1 - protein pcm-1, nhr-40 - protein nhr-40, atg-2 - protein atg-2, dhs-28 - protein dhs-28, dop-2 - protein dop-2, R12B2.6 - protein r12b2.6, aak-2 - protein aak-2, F47A4.5 - protein f47a4.5, unc-70 - protein unc-70, sca-1 - protein sca-1, daf-2 - protein daf-2, eat-16 - protein eat-16, bec-1 - protein bec-1, fasn-1 - protein fasn-1, goa-1 - prot…
GO:0045664	regulation of neuron differentiation	8.83e-05	0.0023	3.45	7788	44	821	16	[unc-75 - protein unc-75, unc-37 - protein unc-37, hlh-2 - protein hlh-2, hda-4 - protein hda-4, zag-1 - protein zag-1, crml-1 - protein crml-1, max-2 - protein max-2, unc-5 - protein unc-5, ham-2 - protein ham-2, jnk-1 - protein jnk-1, unc-53 - protein unc-53, unc-76 - protein unc-76, C01C4.3 - protein c01c4.3, sad-1 - protein sad-1, unc-73 - protein unc-73, exc-7 - protein exc-7]
GO:0050767	regulation of neurogenesis	8.83e-05	0.00229	3.45	7788	44	821	16	[unc-75 - protein unc-75, unc-37 - protein unc-37, hlh-2 - protein hlh-2, hda-4 - protein hda-4, zag-1 - protein zag-1, max-2 - protein max-2, crml-1 - protein crml-1, unc-5 - protein unc-5, ham-2 - protein ham-2, jnk-1 - protein jnk-1, unc-53 - protein unc-53, unc-76 - protein unc-76, C01C4.3 - protein c01c4.3, sad-1 - protein sad-1, unc-73 - protein unc-73, exc-7 - protein exc-7]
GO:0010941	regulation of cell death	9.2e-05	0.00237	1.87	7788	104	1799	45	[ced-3 - protein ced-3, C44B11.1 - protein c44b11.1, mig-15 - protein mig-15, C25A8.5 - protein c25a8.5, skr-1 - protein skr-1, gck-1 - protein gck-1, pak-2 - protein pak-2, lgg-1 - protein lgg-1, rme-1 - protein rme-1, ces-2 - protein ces-2, pek-1 - protein pek-1, lrk-1 - protein lrk-1, pme-5 - protein pme-5, kin-18 - protein kin-18, ire-1 - protein ire-1, dbl-1 - protein dbl-1, sek-1 - protein …
GO:0032956	regulation of actin cytoskeleton organization	9.4e-05	0.00241	4.68	7788	26	704	11	[unc-94 - protein unc-94, hmp-1 - protein hmp-1, eps-8 - protein eps-8, sup-12 - protein sup-12, tmd-2 - protein tmd-2, gsnl-1 - protein gsnl-1, unc-60 - protein unc-60, lev-11 - protein lev-11, unc-73 - protein unc-73, jac-1 - protein jac-1, add-1 - protein add-1]
GO:0007154	cell communication	9.57e-05	0.00244	1.88	7788	106	1763	45	[qua-1 - protein qua-1, unc-75 - protein unc-75, lgg-2 - protein lgg-2, dlg-1 - protein dlg-1, lin-12 - protein lin-12, dgk-1 - protein dgk-1, daf-9 - protein daf-9, unc-18 - protein unc-18, glr-6 - protein glr-6, unc-37 - protein unc-37, atg-2 - protein atg-2, sel-7 - protein sel-7, nud-2 - protein nud-2, unc-38 - protein unc-38, glr-1 - protein glr-1, sek-1 - protein sek-1, dbl-1 - protein dbl-…
GO:0098609	cell-cell adhesion	9.83e-05	0.00249	3.86	7788	28	937	13	[frk-1 - protein frk-1, ceh-13 - protein ceh-13, nsy-4 - protein nsy-4, hmr-1 - protein hmr-1, clc-2 - protein clc-2, vab-9 - protein vab-9, clc-3 - protein clc-3, jac-1 - protein jac-1, ina-1 - protein ina-1, vab-10 - protein vab-10, cdh-1 - protein cdh-1, T01D3.1 - protein t01d3.1, cdh-4 - protein cdh-4]
GO:0032271	regulation of protein polymerization	9.95e-05	0.0025	6.73	7788	18	514	8	[unc-94 - protein unc-94, eps-8 - protein eps-8, tmd-2 - protein tmd-2, gsnl-1 - protein gsnl-1, unc-60 - protein unc-60, lev-11 - protein lev-11, unc-73 - protein unc-73, add-1 - protein add-1]
GO:0030832	regulation of actin filament length	9.95e-05	0.00249	6.73	7788	18	514	8	[unc-94 - protein unc-94, eps-8 - protein eps-8, tmd-2 - protein tmd-2, unc-60 - protein unc-60, gsnl-1 - protein gsnl-1, lev-11 - protein lev-11, unc-73 - protein unc-73, add-1 - protein add-1]
GO:0008064	regulation of actin polymerization or depolymerization	9.95e-05	0.00247	6.73	7788	18	514	8	[unc-94 - protein unc-94, eps-8 - protein eps-8, tmd-2 - protein tmd-2, lev-11 - protein lev-11, gsnl-1 - protein gsnl-1, unc-60 - protein unc-60, unc-73 - protein unc-73, add-1 - protein add-1]
GO:0040017	positive regulation of locomotion	0.000105	0.00259	2.58	7788	34	1777	20	[ccb-1 - protein ccb-1, hlb-1 - protein hlb-1, egl-30 - protein egl-30, egl-10 - protein egl-10, lrp-1 - protein lrp-1, lam-1 - protein lam-1, mig-13 - protein mig-13, pat-2 - protein pat-2, pat-3 - protein pat-3, unc-41 - protein unc-41, unc-5 - protein unc-5, lam-2 - protein lam-2, dyc-1 - protein dyc-1, unc-53 - protein unc-53, fbl-1 - protein fbl-1, acy-1 - protein acy-1, dab-1 - protein dab-…
GO:0048856	anatomical structure development	0.000117	0.00287	1.44	7788	2827	188	98	[dlg-1 - protein dlg-1, ceh-13 - protein ceh-13, klp-3 - protein klp-3, mec-8 - protein mec-8, gei-13 - protein gei-13, klc-2 - protein klc-2, C07A9.2 - protein c07a9.2, peb-1 - protein peb-1, C02B10.5 - protein c02b10.5, nhr-23 - protein nhr-23, eps-8 - protein eps-8, C18A3.4 - protein c18a3.4, egl-19 - protein egl-19, hbl-1 - protein hbl-1, nhr-40 - protein nhr-40, din-1 - protein din-1, ptc-1 …
GO:0009991	response to extracellular stimulus	0.00012	0.00293	3.1	7788	39	1096	17	[lgg-2 - protein lgg-2, dgk-1 - protein dgk-1, pcm-1 - protein pcm-1, nhr-40 - protein nhr-40, atg-2 - protein atg-2, dhs-28 - protein dhs-28, dop-2 - protein dop-2, R12B2.6 - protein r12b2.6, aak-2 - protein aak-2, F47A4.5 - protein f47a4.5, unc-70 - protein unc-70, sca-1 - protein sca-1, eat-16 - protein eat-16, daf-2 - protein daf-2, bec-1 - protein bec-1, fasn-1 - protein fasn-1, goa-1 - prot…
GO:0051693	actin filament capping	0.000121	0.00295	10.82	7788	7	514	5	[unc-94 - protein unc-94, eps-8 - protein eps-8, tmd-2 - protein tmd-2, gsnl-1 - protein gsnl-1, add-1 - protein add-1]
GO:0016055	Wnt signaling pathway	0.000126	0.00305	5.4	7788	33	437	10	[vang-1 - protein vang-1, csnk-1 - protein csnk-1, cfz-2 - protein cfz-2, egl-27 - protein egl-27, tcl-2 - protein tcl-2, dsh-1 - protein dsh-1, lin-17 - protein lin-17, mig-1 - protein mig-1, kin-20 - protein kin-20, lit-1 - protein lit-1]
GO:0022414	reproductive process	0.000128	0.00307	1.85	7788	1208	167	48	[dlg-1 - protein dlg-1, lin-42 - protein lin-42, cyd-1 - protein cyd-1, mig-15 - protein mig-15, CELE_Y75B8A.7 - protein y75b8a.7, lin-39 - protein lin-39, unc-5 - protein unc-5, trim-9 - protein trim-9, C07A9.2 - protein c07a9.2, peb-1 - protein peb-1, abl-1 - protein abl-1, daf-12 - protein daf-12, pdfr-1 - protein pdfr-1, unc-53 - protein unc-53, nhr-23 - protein nhr-23, egl-27 - protein egl-2…
GO:0044700	single organism signaling	0.000128	0.00306	1.9	7788	77	2078	39	[unc-75 - protein unc-75, dlg-1 - protein dlg-1, dgk-1 - protein dgk-1, lin-12 - protein lin-12, unc-18 - protein unc-18, daf-9 - protein daf-9, glr-6 - protein glr-6, rpy-1 - protein rpy-1, unc-37 - protein unc-37, nud-2 - protein nud-2, sel-7 - protein sel-7, unc-38 - protein unc-38, sek-1 - protein sek-1, dbl-1 - protein dbl-1, glr-1 - protein glr-1, rab-3 - protein rab-3, abts-1 - protein abt…
GO:0007267	cell-cell signaling	0.000128	0.00305	1.9	7788	77	2078	39	[unc-75 - protein unc-75, dlg-1 - protein dlg-1, dgk-1 - protein dgk-1, lin-12 - protein lin-12, unc-18 - protein unc-18, daf-9 - protein daf-9, glr-6 - protein glr-6, rpy-1 - protein rpy-1, unc-37 - protein unc-37, nud-2 - protein nud-2, sel-7 - protein sel-7, unc-38 - protein unc-38, sek-1 - protein sek-1, dbl-1 - protein dbl-1, glr-1 - protein glr-1, rab-3 - protein rab-3, abts-1 - protein abt…
GO:0007010	cytoskeleton organization	0.000134	0.00315	3.4	7788	278	132	16	[unc-82 - protein unc-82, F47F2.1 - protein f47f2.1, unc-54 - protein unc-54, nhr-40 - protein nhr-40, anc-1 - protein anc-1, uig-1 - protein uig-1, klc-2 - protein klc-2, unc-94 - protein unc-94, dyc-1 - protein dyc-1, unc-53 - protein unc-53, act-4 - protein act-4, dgk-2 - protein dgk-2, F32B5.7 - protein f32b5.7, emb-9 - protein emb-9, lit-1 - protein lit-1, sax-7 - protein sax-7]
GO:0022603	regulation of anatomical structure morphogenesis	0.000141	0.00331	3.32	7788	104	406	18	[R90.1 - protein r90.1, pac-1 - protein pac-1, max-2 - protein max-2, unc-5 - protein unc-5, srgp-1 - protein srgp-1, dbl-1 - protein dbl-1, vang-1 - protein vang-1, csnk-1 - protein csnk-1, nmy-1 - protein nmy-1, daf-4 - protein daf-4, unc-53 - protein unc-53, hlh-1 - protein hlh-1, C01C4.3 - protein c01c4.3, dsh-1 - protein dsh-1, sad-1 - protein sad-1, unc-73 - protein unc-73, kin-20 - protein…
GO:0044699	single-organism process	0.000141	0.0033	1.27	7788	4983	134	109	[dlg-1 - protein dlg-1, nhr-14 - protein nhr-14, klp-3 - protein klp-3, clh-1 - protein clh-1, ceh-13 - protein ceh-13, lin-39 - protein lin-39, mec-8 - protein mec-8, pde-4 - protein pde-4, gei-13 - protein gei-13, klc-2 - protein klc-2, peb-1 - protein peb-1, jph-1 - protein jph-1, nhr-23 - protein nhr-23, syg-1 - protein syg-1, nhr-85 - protein nhr-85, C18A3.4 - protein c18a3.4, unc-82 - prote…
GO:0035150	regulation of tube size	0.000158	0.00368	5.71	7788	9	1061	7	[exc-9 - protein exc-9, sma-1 - protein sma-1, let-653 - protein let-653, let-4 - protein let-4, exc-4 - protein exc-4, exc-5 - protein exc-5, exc-7 - protein exc-7]
GO:0051494	negative regulation of cytoskeleton organization	0.000219	0.00506	9.91	7788	18	262	6	[unc-94 - protein unc-94, eps-8 - protein eps-8, ppfr-1 - protein ppfr-1, gsnl-1 - protein gsnl-1, lev-11 - protein lev-11, add-1 - protein add-1]
GO:0043242	negative regulation of protein complex disassembly	0.000234	0.00537	12.39	7788	12	262	5	[unc-94 - protein unc-94, eps-8 - protein eps-8, gsnl-1 - protein gsnl-1, lev-11 - protein lev-11, add-1 - protein add-1]
GO:1901880	negative regulation of protein depolymerization	0.000234	0.00534	12.39	7788	12	262	5	[unc-94 - protein unc-94, eps-8 - protein eps-8, lev-11 - protein lev-11, gsnl-1 - protein gsnl-1, add-1 - protein add-1]
GO:0040013	negative regulation of locomotion	0.000234	0.00532	2.9	7788	24	1681	15	[dgk-1 - protein dgk-1, egl-30 - protein egl-30, R13A5.7 - protein r13a5.7, rsbp-1 - protein rsbp-1, pde-4 - protein pde-4, blmp-1 - protein blmp-1, srgp-1 - protein srgp-1, abl-1 - protein abl-1, gsa-1 - protein gsa-1, gpb-1 - protein gpb-1, swan-1 - protein swan-1, acy-1 - protein acy-1, kin-2 - protein kin-2, eat-16 - protein eat-16, goa-1 - protein goa-1]
GO:0009605	response to external stimulus	0.000236	0.00534	1.99	7788	143	1096	40	[lgg-2 - protein lgg-2, clec-52 - protein clec-52, dgk-1 - protein dgk-1, lgg-1 - protein lgg-1, atg-2 - protein atg-2, mec-8 - protein mec-8, dhs-28 - protein dhs-28, mec-1 - protein mec-1, R12B2.6 - protein r12b2.6, dbl-1 - protein dbl-1, rga-6 - protein rga-6, daf-14 - protein daf-14, abl-1 - protein abl-1, jnk-1 - protein jnk-1, F47A4.5 - protein f47a4.5, unc-70 - protein unc-70, cng-2 - prot…
GO:0048546	digestive tract morphogenesis	0.000237	0.00534	26.79	7788	4	218	3	[vang-1 - protein vang-1, egl-15 - protein egl-15, eps-8 - protein eps-8]
GO:0002009	morphogenesis of an epithelium	0.000243	0.00545	3.08	7788	38	1064	16	[die-1 - protein die-1, lin-18 - protein lin-18, sqv-6 - protein sqv-6, vab-2 - protein vab-2, efn-4 - protein efn-4, bar-1 - protein bar-1, eff-1 - protein eff-1, exc-9 - protein exc-9, vab-10 - protein vab-10, eps-8 - protein eps-8, bus-18 - protein bus-18, erm-1 - protein erm-1, lin-17 - protein lin-17, vab-1 - protein vab-1, kal-1 - protein kal-1, sdn-1 - protein sdn-1]
GO:0007626	locomotory behavior	0.000244	0.00543	4.19	7788	25	818	11	[unc-98 - protein unc-98, dyc-1 - protein dyc-1, myo-3 - protein myo-3, basl-1 - protein basl-1, nipa-1 - protein nipa-1, unc-10 - protein unc-10, lin-39 - protein lin-39, lite-1 - protein lite-1, unc-49 - protein unc-49, syd-2 - protein syd-2, trim-9 - protein trim-9]
GO:0016204	determination of muscle attachment site	0.000257	0.00569	3894	7788	1	2	1	[unc-53 - protein unc-53]
GO:0098602	single organism cell adhesion	0.00029	0.00638	4.68	7788	16	937	9	[ina-1 - protein ina-1, vab-10 - protein vab-10, frk-1 - protein frk-1, ceh-13 - protein ceh-13, nsy-4 - protein nsy-4, clc-2 - protein clc-2, vab-9 - protein vab-9, clc-3 - protein clc-3, jac-1 - protein jac-1]
GO:0016337	single organismal cell-cell adhesion	0.00029	0.00635	4.68	7788	16	937	9	[vab-10 - protein vab-10, ina-1 - protein ina-1, frk-1 - protein frk-1, ceh-13 - protein ceh-13, nsy-4 - protein nsy-4, clc-2 - protein clc-2, vab-9 - protein vab-9, clc-3 - protein clc-3, jac-1 - protein jac-1]
GO:0022611	dormancy process	0.000291	0.00634	10.73	7788	44	99	6	[daf-12 - protein daf-12, nhr-85 - protein nhr-85, mec-8 - protein mec-8, mec-1 - protein mec-1, daf-19 - protein daf-19, daf-16 - protein daf-16]
GO:0010647	positive regulation of cell communication	0.000307	0.00667	1.96	7788	79	1763	35	[unc-75 - protein unc-75, mig-15 - protein mig-15, egl-30 - protein egl-30, unc-18 - protein unc-18, sel-7 - protein sel-7, kin-18 - protein kin-18, ire-1 - protein ire-1, dbl-1 - protein dbl-1, sek-1 - protein sek-1, let-765 - protein let-765, rsks-1 - protein rsks-1, sem-5 - protein sem-5, osm-11 - protein osm-11, tig-2 - protein tig-2, jkk-1 - protein jkk-1, syd-2 - protein syd-2, mek-1 - prot…
GO:0048013	ephrin receptor signaling pathway	0.000315	0.00679	39.33	7788	9	66	3	[vab-2 - protein vab-2, vab-1 - protein vab-1, efn-2 - protein efn-2]
GO:0048869	cellular developmental process	0.000319	0.00685	1.66	7788	559	537	64	[lin-42 - protein lin-42, mig-15 - protein mig-15, lim-4 - protein lim-4, ceh-18 - protein ceh-18, cnt-2 - protein cnt-2, fkh-9 - protein fkh-9, mec-8 - protein mec-8, C07A9.2 - protein c07a9.2, blmp-1 - protein blmp-1, dbl-1 - protein dbl-1, abl-1 - protein abl-1, sgn-1 - protein sgn-1, unc-53 - protein unc-53, nck-1 - protein nck-1, hlh-1 - protein hlh-1, egl-27 - protein egl-27, unc-70 - prote…
GO:0007169	transmembrane receptor protein tyrosine kinase signaling pathway	0.000334	0.00714	3.66	7788	60	497	14	[egl-15 - protein egl-15, soc-2 - protein soc-2, vab-2 - protein vab-2, akt-1 - protein akt-1, efn-4 - protein efn-4, abl-1 - protein abl-1, cam-1 - protein cam-1, rgl-1 - protein rgl-1, vab-1 - protein vab-1, pkc-1 - protein pkc-1, daf-2 - protein daf-2, efn-2 - protein efn-2, Y43C5B.2 - protein y43c5b.2, daf-16 - protein daf-16]
GO:0043085	positive regulation of catalytic activity	0.000341	0.00725	1.98	7788	143	1073	39	[ced-3 - protein ced-3, mig-15 - protein mig-15, egl-10 - protein egl-10, gck-1 - protein gck-1, pac-1 - protein pac-1, pak-2 - protein pak-2, sipa-1 - protein sipa-1, cnt-2 - protein cnt-2, kin-18 - protein kin-18, exc-5 - protein exc-5, dct-1 - protein dct-1, cgef-2 - protein cgef-2, pdfr-1 - protein pdfr-1, rrc-1 - protein rrc-1, ckk-1 - protein ckk-1, rgl-1 - protein rgl-1, shc-1 - protein sh…
GO:0051336	regulation of hydrolase activity	0.000342	0.00724	1.3	7788	157	4014	105	[Y32H12A.4 - protein y32h12a.4, gap-1 - protein gap-1, pptr-1 - protein pptr-1, CELE_ZC84.1 - protein zc84.1, C08G9.2 - protein c08g9.2, sipa-1 - protein sipa-1, rpa-1 - protein rpa-1, tep-1 - protein tep-1, cri-2 - protein cri-2, bir-2 - protein bir-2, srp-7 - protein srp-7, csp-3 - protein csp-3, ags-3 - protein ags-3, R05G6.10 - protein r05g6.10, Y34B4A.4 - protein y34b4a.4, uri-1 - protein ur…
GO:0006366	transcription from RNA polymerase II promoter	0.000345	0.00726	10.91	7788	84	51	6	[hbl-1 - protein hbl-1, hlh-1 - protein hlh-1, hlh-30 - protein hlh-30, fkh-7 - protein fkh-7, unc-130 - protein unc-130, tag-97 - protein tag-97]
GO:0048729	tissue morphogenesis	0.000359	0.00751	3	7788	39	1064	16	[lin-18 - protein lin-18, die-1 - protein die-1, sqv-6 - protein sqv-6, vab-2 - protein vab-2, efn-4 - protein efn-4, bar-1 - protein bar-1, eff-1 - protein eff-1, exc-9 - protein exc-9, vab-10 - protein vab-10, eps-8 - protein eps-8, bus-18 - protein bus-18, erm-1 - protein erm-1, lin-17 - protein lin-17, vab-1 - protein vab-1, kal-1 - protein kal-1, sdn-1 - protein sdn-1]
GO:0042692	muscle cell differentiation	0.000383	0.00798	22.82	7788	4	256	3	[unc-62 - protein unc-62, hlh-1 - protein hlh-1, sem-4 - protein sem-4]
GO:0031098	stress-activated protein kinase signaling cascade	0.000411	0.00854	2.87	7788	18	1960	13	[mig-15 - protein mig-15, gck-1 - protein gck-1, pak-2 - protein pak-2, max-2 - protein max-2, kin-18 - protein kin-18, sek-1 - protein sek-1, pmk-1 - protein pmk-1, jnk-1 - protein jnk-1, T07F12.4 - protein t07f12.4, CELE_W09H1.1 - protein w09h1.1, pak-1 - protein pak-1, mig-2 - protein mig-2, C01C4.3 - protein c01c4.3]
GO:0007268	synaptic transmission	0.000422	0.00871	2.07	7788	62	1763	29	[unc-75 - protein unc-75, dlg-1 - protein dlg-1, dgk-1 - protein dgk-1, unc-18 - protein unc-18, glr-6 - protein glr-6, unc-37 - protein unc-37, nud-2 - protein nud-2, unc-38 - protein unc-38, dbl-1 - protein dbl-1, glr-1 - protein glr-1, sek-1 - protein sek-1, rab-3 - protein rab-3, abts-1 - protein abts-1, acr-2 - protein acr-2, irx-1 - protein irx-1, cab-1 - protein cab-1, syd-2 - protein syd-…
GO:0044093	positive regulation of molecular function	0.000467	0.00959	1.95	7788	145	1073	39	[ced-3 - protein ced-3, mig-15 - protein mig-15, egl-10 - protein egl-10, gck-1 - protein gck-1, pac-1 - protein pac-1, pak-2 - protein pak-2, sipa-1 - protein sipa-1, cnt-2 - protein cnt-2, kin-18 - protein kin-18, exc-5 - protein exc-5, dct-1 - protein dct-1, cgef-2 - protein cgef-2, pdfr-1 - protein pdfr-1, rrc-1 - protein rrc-1, ckk-1 - protein ckk-1, rgl-1 - protein rgl-1, shc-1 - protein sh…
GO:0032970	regulation of actin filament-based process	0.000472	0.00966	4.06	7788	30	704	11	[unc-94 - protein unc-94, hmp-1 - protein hmp-1, eps-8 - protein eps-8, sup-12 - protein sup-12, tmd-2 - protein tmd-2, gsnl-1 - protein gsnl-1, lev-11 - protein lev-11, unc-60 - protein unc-60, unc-73 - protein unc-73, jac-1 - protein jac-1, add-1 - protein add-1]
GO:0000185	activation of MAPKKK activity	0.000508	0.0103	3894	7788	2	1	1	[mig-15 - protein mig-15]
GO:0051049	regulation of transport	0.000514	0.0104	2.49	7788	117	642	24	[sng-1 - protein sng-1, egl-19 - protein egl-19, clh-1 - protein clh-1, nsy-4 - protein nsy-4, cnt-2 - protein cnt-2, mef-2 - protein mef-2, unc-93 - protein unc-93, cca-1 - protein cca-1, pat-2 - protein pat-2, uig-1 - protein uig-1, srgp-1 - protein srgp-1, abl-1 - protein abl-1, jph-1 - protein jph-1, exp-2 - protein exp-2, daf-2 - protein daf-2, unc-112 - protein unc-112, hid-1 - protein hid-…
GO:0034654	nucleobase-containing compound biosynthetic process	0.000518	0.0104	3.03	7788	587	70	16	[nhr-25 - protein nhr-25, hbl-1 - protein hbl-1, nhr-14 - protein nhr-14, lin-42 - protein lin-42, hlh-30 - protein hlh-30, nhr-40 - protein nhr-40, unc-130 - protein unc-130, lin-14 - protein lin-14, daf-12 - protein daf-12, nhr-23 - protein nhr-23, hlh-1 - protein hlh-1, fkh-7 - protein fkh-7, nhr-85 - protein nhr-85, tag-97 - protein tag-97, nhr-1 - protein nhr-1, daf-19 - protein daf-19]
GO:0031344	regulation of cell projection organization	0.000526	0.0106	3.16	7788	45	821	15	[egl-15 - protein egl-15, soc-2 - protein soc-2, unc-37 - protein unc-37, zag-1 - protein zag-1, crml-1 - protein crml-1, max-2 - protein max-2, unc-5 - protein unc-5, sem-5 - protein sem-5, jnk-1 - protein jnk-1, unc-53 - protein unc-53, unc-76 - protein unc-76, C01C4.3 - protein c01c4.3, sad-1 - protein sad-1, unc-73 - protein unc-73, daf-19 - protein daf-19]
GO:0007178	transmembrane receptor protein serine/threonine kinase signaling pathway	0.00054	0.0108	3.3	7788	21	1349	12	[obr-3 - protein obr-3, mab-31 - protein mab-31, tag-68 - protein tag-68, daf-4 - protein daf-4, C08G9.1 - protein c08g9.1, sma-9 - protein sma-9, kin-29 - protein kin-29, sma-2 - protein sma-2, sma-3 - protein sma-3, F36H9.2 - protein f36h9.2, D1053.4 - protein d1053.4, dbl-1 - protein dbl-1]
GO:0051235	maintenance of location	0.000554	0.011	1.21	7788	395	3481	214	[F27C1.4 - protein f27c1.4, CELE_C30H7.2 - protein c30h7.2, lbp-5 - protein lbp-5, ttr-48 - protein ttr-48, klf-3 - protein klf-3, nhr-86 - protein nhr-86, CELE_W03A5.4 - protein w03a5.4, lbp-9 - protein lbp-9, atp-3 - protein atp-3, C07A9.2 - protein c07a9.2, peb-1 - protein peb-1, lpin-1 - protein lpin-1, C43H6.1 - protein c43h6.1, K05F1.6 - protein k05f1.6, T01D3.5 - protein t01d3.5, K02E10.4 …
GO:0030154	cell differentiation	0.000564	0.0112	2.29	7788	154	530	24	[unc-62 - protein unc-62, mab-3 - protein mab-3, lin-42 - protein lin-42, tra-2 - protein tra-2, apl-1 - protein apl-1, hmr-1 - protein hmr-1, fkh-9 - protein fkh-9, ark-1 - protein ark-1, efa-6 - protein efa-6, pha-4 - protein pha-4, abl-1 - protein abl-1, unc-98 - protein unc-98, par-3 - protein par-3, egl-44 - protein egl-44, rnt-1 - protein rnt-1, hlh-1 - protein hlh-1, egl-27 - protein egl-2…
GO:0030004	cellular monovalent inorganic cation homeostasis	0.000576	0.0113	5.03	7788	10	1083	7	[vha-5 - protein vha-5, abts-3 - protein abts-3, abts-4 - protein abts-4, abts-1 - protein abts-1, rab-14 - protein rab-14, vha-7 - protein vha-7, unc-108 - protein unc-108]
GO:0030641	regulation of cellular pH	0.000576	0.0113	5.03	7788	10	1083	7	[abts-3 - protein abts-3, vha-5 - protein vha-5, abts-1 - protein abts-1, abts-4 - protein abts-4, rab-14 - protein rab-14, unc-108 - protein unc-108, vha-7 - protein vha-7]
GO:0051453	regulation of intracellular pH	0.000576	0.0112	5.03	7788	10	1083	7	[vha-5 - protein vha-5, abts-3 - protein abts-3, abts-4 - protein abts-4, abts-1 - protein abts-1, rab-14 - protein rab-14, vha-7 - protein vha-7, unc-108 - protein unc-108]
GO:0060537	muscle tissue development	0.000601	0.0117	52.98	7788	2	147	2	[sgn-1 - protein sgn-1, daf-16 - protein daf-16]
GO:1901879	regulation of protein depolymerization	0.000623	0.012	10.62	7788	14	262	5	[unc-94 - protein unc-94, eps-8 - protein eps-8, lev-11 - protein lev-11, gsnl-1 - protein gsnl-1, add-1 - protein add-1]
GO:0034329	cell junction assembly	0.000654	0.0126	18.54	7788	21	80	4	[dlg-1 - protein dlg-1, pat-12 - protein pat-12, egl-27 - protein egl-27, mec-8 - protein mec-8]
GO:0051403	stress-activated MAPK cascade	0.000656	0.0126	4.35	7788	6	1792	6	[pmk-1 - protein pmk-1, jnk-1 - protein jnk-1, CELE_W09H1.1 - protein w09h1.1, mig-2 - protein mig-2, max-2 - protein max-2, sek-1 - protein sek-1]
GO:0048812	neuron projection morphogenesis	0.0007	0.0134	152.71	7788	17	6	2	[mig-15 - protein mig-15, vab-1 - protein vab-1]
GO:0008361	regulation of cell size	0.000719	0.0137	5.99	7788	16	569	7	[sma-1 - protein sma-1, sma-3 - protein sma-3, let-607 - protein let-607, aqp-7 - protein aqp-7, adt-2 - protein adt-2, aqp-2 - protein aqp-2, dbl-1 - protein dbl-1]
GO:0019438	aromatic compound biosynthetic process	0.000727	0.0138	2.94	7788	606	70	16	[nhr-25 - protein nhr-25, hbl-1 - protein hbl-1, nhr-14 - protein nhr-14, lin-42 - protein lin-42, hlh-30 - protein hlh-30, nhr-40 - protein nhr-40, unc-130 - protein unc-130, lin-14 - protein lin-14, daf-12 - protein daf-12, nhr-23 - protein nhr-23, hlh-1 - protein hlh-1, fkh-7 - protein fkh-7, nhr-85 - protein nhr-85, tag-97 - protein tag-97, nhr-1 - protein nhr-1, daf-19 - protein daf-19]
GO:0018130	heterocycle biosynthetic process	0.000734	0.0138	1.13	7788	617	4299	386	[nhr-61 - protein nhr-61, nhr-14 - protein nhr-14, pri-1 - protein pri-1, hlh-11 - protein hlh-11, nhr-86 - protein nhr-86, nhr-59 - protein nhr-59, nhr-56 - protein nhr-56, ahr-1 - protein ahr-1, nhr-146 - protein nhr-146, F55G1.9 - protein f55g1.9, rgr-1 - protein rgr-1, fkh-8 - protein fkh-8, npax-2 - protein npax-2, nhr-199 - protein nhr-199, lin-53 - protein lin-53, nhr-177 - protein nhr-177…
GO:0035239	tube morphogenesis	0.000755	0.0142	21.43	7788	5	218	3	[vang-1 - protein vang-1, egl-15 - protein egl-15, eps-8 - protein eps-8]
GO:0030335	positive regulation of cell migration	0.000759	0.0142	1947	7788	2	2	1	[unc-53 - protein unc-53]
GO:0035567	non-canonical Wnt signaling pathway	0.000774	0.0144	9.57	7788	12	339	5	[vang-1 - protein vang-1, cfz-2 - protein cfz-2, dsh-1 - protein dsh-1, lin-17 - protein lin-17, mig-1 - protein mig-1]
GO:0040025	vulval development	0.000783	0.0145	5.4	7788	86	151	9	[ldb-1 - protein ldb-1, lin-14 - protein lin-14, soc-2 - protein soc-2, hbl-1 - protein hbl-1, alg-1 - protein alg-1, mbk-2 - protein mbk-2, egl-18 - protein egl-18, sdn-1 - protein sdn-1, peb-1 - protein peb-1]
GO:0032272	negative regulation of protein polymerization	0.000814	0.015	8.42	7788	9	514	5	[unc-94 - protein unc-94, eps-8 - protein eps-8, tmd-2 - protein tmd-2, gsnl-1 - protein gsnl-1, add-1 - protein add-1]
GO:0030837	negative regulation of actin filament polymerization	0.000814	0.0149	8.42	7788	9	514	5	[unc-94 - protein unc-94, eps-8 - protein eps-8, tmd-2 - protein tmd-2, gsnl-1 - protein gsnl-1, add-1 - protein add-1]
GO:0010172	embryonic body morphogenesis	0.000841	0.0154	2.28	7788	31	2098	19	[spc-1 - protein spc-1, wrm-1 - protein wrm-1, pxn-2 - protein pxn-2, frk-1 - protein frk-1, paf-2 - protein paf-2, sym-2 - protein sym-2, mrck-1 - protein mrck-1, wip-1 - protein wip-1, jac-1 - protein jac-1, eff-1 - protein eff-1, hmp-1 - protein hmp-1, sma-1 - protein sma-1, pak-1 - protein pak-1, ceh-16 - protein ceh-16, unc-70 - protein unc-70, vab-1 - protein vab-1, let-502 - protein let-50…
GO:0048569	post-embryonic organ development	0.000853	0.0155	5.34	7788	87	151	9	[ldb-1 - protein ldb-1, lin-14 - protein lin-14, soc-2 - protein soc-2, hbl-1 - protein hbl-1, alg-1 - protein alg-1, mbk-2 - protein mbk-2, egl-18 - protein egl-18, sdn-1 - protein sdn-1, peb-1 - protein peb-1]
GO:1902532	negative regulation of intracellular signal transduction	0.000862	0.0156	6.79	7788	36	223	7	[abl-1 - protein abl-1, nsy-4 - protein nsy-4, let-607 - protein let-607, pde-4 - protein pde-4, aak-2 - protein aak-2, vhp-1 - protein vhp-1, acy-3 - protein acy-3]
GO:0019915	lipid storage	0.000868	0.0156	1.21	7788	383	3481	207	[F27C1.4 - protein f27c1.4, CELE_C30H7.2 - protein c30h7.2, lbp-5 - protein lbp-5, ttr-48 - protein ttr-48, klf-3 - protein klf-3, CELE_W03A5.4 - protein w03a5.4, nhr-86 - protein nhr-86, lbp-9 - protein lbp-9, atp-3 - protein atp-3, C07A9.2 - protein c07a9.2, peb-1 - protein peb-1, lpin-1 - protein lpin-1, C43H6.1 - protein c43h6.1, K05F1.6 - protein k05f1.6, T01D3.5 - protein t01d3.5, col-125 -…
GO:0031325	positive regulation of cellular metabolic process	0.000904	0.0162	1.41	7788	205	2297	85	[ced-3 - protein ced-3, hsf-1 - protein hsf-1, mig-15 - protein mig-15, tyra-3 - protein tyra-3, kin-18 - protein kin-18, dbl-1 - protein dbl-1, lpin-1 - protein lpin-1, crh-1 - protein crh-1, daf-12 - protein daf-12, hlh-1 - protein hlh-1, che-1 - protein che-1, sptf-3 - protein sptf-3, mab-5 - protein mab-5, jkk-1 - protein jkk-1, atf-7 - protein atf-7, shc-1 - protein shc-1, cfi-1 - protein cf…
GO:0030010	establishment of cell polarity	0.000948	0.017	11.5	7788	7	387	4	[par-3 - protein par-3, cam-1 - protein cam-1, par-1 - protein par-1, sad-1 - protein sad-1]
GO:0016070	RNA metabolic process	0.000954	0.017	2.51	7788	721	86	20	[nhr-25 - protein nhr-25, hbl-1 - protein hbl-1, lin-42 - protein lin-42, nhr-14 - protein nhr-14, hlh-30 - protein hlh-30, nhr-40 - protein nhr-40, sym-2 - protein sym-2, unc-130 - protein unc-130, nhr-66 - protein nhr-66, lin-14 - protein lin-14, daf-12 - protein daf-12, nhr-23 - protein nhr-23, hlh-1 - protein hlh-1, egl-27 - protein egl-27, fkh-7 - protein fkh-7, nhr-85 - protein nhr-85, tag-…
GO:0001764	neuron migration	0.00097	0.0172	4.48	7788	24	652	9	[sax-3 - protein sax-3, ina-1 - protein ina-1, vab-8 - protein vab-8, eor-2 - protein eor-2, kal-1 - protein kal-1, unc-39 - protein unc-39, mig-10 - protein mig-10, unc-73 - protein unc-73, tag-333 - protein tag-333]
GO:0044763	single-organism cellular process	0.000975	0.0172	1.56	7788	2928	85	50	[dlg-1 - protein dlg-1, lin-42 - protein lin-42, mig-15 - protein mig-15, ceh-13 - protein ceh-13, lin-39 - protein lin-39, mec-8 - protein mec-8, mec-1 - protein mec-1, pde-4 - protein pde-4, mvk-1 - protein mvk-1, abl-1 - protein abl-1, unc-53 - protein unc-53, hlh-1 - protein hlh-1, egl-27 - protein egl-27, vab-1 - protein vab-1, alg-1 - protein alg-1, unc-82 - protein unc-82, abts-3 - protein…
