# Supplementary material for: Chromatin accessibility dynamics reveal novel functional enhancers in C. elegans
Source: Genome Res. 2017 Dec;27(12):2096–107. doi: 10.1101/gr.226233.117 (PMC5741055; doi:10.1101/gr.226233.117)
Supplement: Supplemental Material [file supp_gr.226233.117_Supplemental_Table_S7.xlsx]

## Sheet: S7 - YA more access. vs L3 - BP
GO Term	Description	P-value	FDR q-value	Enrichment	N	B	n	b	Genes
GO:0009792	embryo development ending in birth or egg hatching	2.29e-17	9.81e-14	1.15	7788	2208	4218	1379	[homt-1 - protein homt-1, CELE_C47E8.6 - protein c47e8.6, C36B1.13 - protein c36b1.13, fzo-1 - protein fzo-1, pgs-1 - protein pgs-1, rpl-7 - protein rpl-7, tbc-2 - protein tbc-2, F56C11.6 - protein f56c11.6, ZK1098.1 - protein zk1098.1, clu-1 - protein clu-1, mut-7 - protein mut-7, xpo-2 - protein xpo-2, taf-4 - protein taf-4, rars-2 - protein rars-2, CELE_R119.3 - protein r119.3, CELE_ZC204.6 - …
GO:0009790	embryo development	5.1e-17	1.09e-13	1.15	7788	2218	4218	1383	[homt-1 - protein homt-1, CELE_C47E8.6 - protein c47e8.6, C36B1.13 - protein c36b1.13, fzo-1 - protein fzo-1, pgs-1 - protein pgs-1, rpl-7 - protein rpl-7, tbc-2 - protein tbc-2, F56C11.6 - protein f56c11.6, ZK1098.1 - protein zk1098.1, clu-1 - protein clu-1, mut-7 - protein mut-7, xpo-2 - protein xpo-2, taf-4 - protein taf-4, rars-2 - protein rars-2, CELE_R119.3 - protein r119.3, CELE_T26G10.1 -…
GO:0000003	reproduction	1.41e-15	2.01e-12	1.17	7788	1604	4307	1042	[homt-1 - protein homt-1, CELE_C47E8.6 - protein c47e8.6, nlp-40 - protein nlp-40, pgs-1 - protein pgs-1, rpl-7 - protein rpl-7, tbc-2 - protein tbc-2, F56C11.6 - protein f56c11.6, ZK1098.1 - protein zk1098.1, C53D5.5 - protein c53d5.5, ZK1098.2 - protein zk1098.2, xpo-2 - protein xpo-2, taf-4 - protein taf-4, rars-2 - protein rars-2, clec-205 - protein clec-205, CELE_T26G10.1 - protein t26g10.1,…
GO:0048856	anatomical structure development	8.91e-12	9.52e-09	1.1	7788	2827	4279	1706	[homt-1 - protein homt-1, pgs-1 - protein pgs-1, rpl-7 - protein rpl-7, CELE_F58A4.9 - protein f58a4.9, ubc-7 - protein ubc-7, spe-8 - protein spe-8, F56C11.6 - protein f56c11.6, ZK1098.1 - protein zk1098.1, clu-1 - protein clu-1, mut-7 - protein mut-7, xpo-2 - protein xpo-2, taf-4 - protein taf-4, CELE_R119.3 - protein r119.3, CELE_T26G10.1 - protein t26g10.1, CELE_ZC204.6 - protein zc204.6, emb…
GO:0006396	RNA processing	2.74e-08	2.34e-05	1.38	7788	184	4267	139	[F30A10.9 - protein f30a10.9, B0035.12 - protein b0035.12, nol-5 - protein nol-5, F52H3.2 - protein f52h3.2, mag-1 - protein mag-1, K04G7.11 - protein k04g7.11, F48E8.6 - protein f48e8.6, B0035.16 - protein b0035.16, CELE_Y53F4B.13 - protein y53f4b.13, crn-4 - protein crn-4, rps-21 - protein rps-21, C50D2.5 - protein c50d2.5, clpf-1 - protein clpf-1, Y66H1A.4 - protein y66h1a.4, mut-7 - protein m…
GO:0006412	translation	3.91e-08	2.78e-05	1.42	7788	154	4161	117	[eif-3.B - protein eif-3.b, nars-2 - protein nars-2, rps-14 - protein rps-14, eif-1.A - protein eif-1.a, ife-2 - protein ife-2, rps-21 - protein rps-21, rps-18 - protein rps-18, ears-2 - protein ears-2, rpl-6 - protein rpl-6, mrps-21 - protein mrps-21, mrpl-17 - protein mrpl-17, egl-45 - protein egl-45, mrpl-9 - protein mrpl-9, rars-2 - protein rars-2, gars-1 - protein gars-1, mrps-7 - protein mr…
GO:0006518	peptide metabolic process	6.15e-08	3.75e-05	1.42	7788	177	3903	126	[eif-3.B - protein eif-3.b, nars-2 - protein nars-2, rps-14 - protein rps-14, eif-1.A - protein eif-1.a, ife-2 - protein ife-2, rps-21 - protein rps-21, ears-2 - protein ears-2, rpl-6 - protein rpl-6, mrps-21 - protein mrps-21, pam-1 - protein pam-1, mrpl-17 - protein mrpl-17, C53D5.5 - protein c53d5.5, egl-45 - protein egl-45, mrpl-9 - protein mrpl-9, rars-2 - protein rars-2, gars-1 - protein ga…
GO:0043043	peptide biosynthetic process	6.63e-08	3.54e-05	1.41	7788	158	4161	119	[eif-3.B - protein eif-3.b, nars-2 - protein nars-2, ife-2 - protein ife-2, eif-1.A - protein eif-1.a, rps-14 - protein rps-14, rps-21 - protein rps-21, rps-18 - protein rps-18, ears-2 - protein ears-2, rpl-6 - protein rpl-6, mrps-21 - protein mrps-21, mrpl-17 - protein mrpl-17, egl-45 - protein egl-45, mrpl-9 - protein mrpl-9, rars-2 - protein rars-2, mrps-7 - protein mrps-7, gars-1 - protein ga…
GO:0044767	single-organism developmental process	7.61e-08	3.62e-05	1.09	7788	3149	3660	1607	[dpy-6 - protein dpy-6, pgs-1 - protein pgs-1, rpl-7 - protein rpl-7, CELE_F58A4.9 - protein f58a4.9, ubc-7 - protein ubc-7, spe-8 - protein spe-8, jbts-14 - protein jbts-14, F56C11.6 - protein f56c11.6, ZK1098.1 - protein zk1098.1, clu-1 - protein clu-1, mut-7 - protein mut-7, xpo-2 - protein xpo-2, daf-25 - protein daf-25, taf-4 - protein taf-4, CELE_R119.3 - protein r119.3, W04C9.4 - protein w…
GO:0032502	developmental process	9.64e-08	4.12e-05	1.08	7788	3195	3957	1750	[homt-1 - protein homt-1, dpy-6 - protein dpy-6, pgs-1 - protein pgs-1, rpl-7 - protein rpl-7, CELE_F58A4.9 - protein f58a4.9, ubc-7 - protein ubc-7, spe-8 - protein spe-8, jbts-14 - protein jbts-14, F56C11.6 - protein f56c11.6, ZK1098.1 - protein zk1098.1, clu-1 - protein clu-1, mut-7 - protein mut-7, xpo-2 - protein xpo-2, daf-25 - protein daf-25, taf-4 - protein taf-4, CELE_R119.3 - protein r1…
GO:0006869	lipid transport	5.46e-07	0.000212	52.98	7788	35	21	5	[vit-2 - protein vit-2, vit-6 - protein vit-6, vit-1 - protein vit-1, vit-4 - protein vit-4, vit-5 - protein vit-5]
GO:0034660	ncRNA metabolic process	1.17e-06	0.000416	1.44	7788	115	4267	91	[F30A10.9 - protein f30a10.9, nol-5 - protein nol-5, nars-2 - protein nars-2, K01G5.5 - protein k01g5.5, F52H3.2 - protein f52h3.2, F48E8.6 - protein f48e8.6, B0035.16 - protein b0035.16, frg-1 - protein frg-1, crn-4 - protein crn-4, lsm-6 - protein lsm-6, rps-21 - protein rps-21, clpf-1 - protein clpf-1, dao-5 - protein dao-5, nol-6 - protein nol-6, ears-2 - protein ears-2, exos-2 - protein exos…
GO:0022412	cellular process involved in reproduction in multicellular organism	1.56e-06	0.000513	1.55	7788	311	1788	111	[syp-1 - protein syp-1, mag-1 - protein mag-1, CELE_Y41E3.1 - protein y41e3.1, sas-5 - protein sas-5, CELE_Y41E3.11 - protein y41e3.11, ima-3 - protein ima-3, nex-3 - protein nex-3, riok-1 - protein riok-1, ZK686.4 - protein zk686.4, eri-1 - protein eri-1, vbh-1 - protein vbh-1, smn-1 - protein smn-1, kgb-1 - protein kgb-1, CELE_F38E11.5 - protein f38e11.5, rsp-8 - protein rsp-8, asfl-1 - protein…
GO:0003006	developmental process involved in reproduction	3.39e-06	0.00103	1.15	7788	945	3995	558	[homt-1 - protein homt-1, F30A10.9 - protein f30a10.9, usp-48 - protein usp-48, rbm-28 - protein rbm-28, CELE_F58A4.9 - protein f58a4.9, CELE_Y53F4B.13 - protein y53f4b.13, ubc-7 - protein ubc-7, skr-2 - protein skr-2, spe-8 - protein spe-8, ima-3 - protein ima-3, ref-2 - protein ref-2, CELE_F53F4.11 - protein f53f4.11, dut-1 - protein dut-1, xpo-2 - protein xpo-2, C46H11.6 - protein c46h11.6, sm…
GO:0006259	DNA metabolic process	3.46e-06	0.000985	1.4	7788	150	4031	109	[top-2 - protein top-2, clk-2 - protein clk-2, cdt-1 - protein cdt-1, F33H2.5 - protein f33h2.5, crn-4 - protein crn-4, exo-3 - protein exo-3, Y66D12A.15 - protein y66d12a.15, fcd-2 - protein fcd-2, dog-1 - protein dog-1, mcm-2 - protein mcm-2, CELE_F42A6.5 - protein f42a6.5, lem-3 - protein lem-3, CELE_F53F4.14 - protein f53f4.14, CELE_C08H9.3 - protein c08h9.3, eri-1 - protein eri-1, C23H4.6 - …
GO:0007281	germ cell development	3.46e-06	0.000924	1.34	7788	293	3298	166	[ggtb-1 - protein ggtb-1, syp-1 - protein syp-1, mag-1 - protein mag-1, K04G7.11 - protein k04g7.11, CELE_Y41E3.1 - protein y41e3.1, sas-5 - protein sas-5, CELE_Y41E3.11 - protein y41e3.11, spe-8 - protein spe-8, inx-14 - protein inx-14, T07A9.9 - protein t07a9.9, apc-17 - protein apc-17, ima-3 - protein ima-3, C35D10.13 - protein c35d10.13, nex-3 - protein nex-3, riok-1 - protein riok-1, ZK686.4…
GO:0051276	chromosome organization	4.01e-06	0.00101	2.01	7788	79	2163	44	[mcm-5 - protein mcm-5, trt-1 - protein trt-1, clk-2 - protein clk-2, syp-1 - protein syp-1, ceh-37 - protein ceh-37, scc-1 - protein scc-1, cpar-1 - protein cpar-1, smc-4 - protein smc-4, tim-1 - protein tim-1, Y66D12A.15 - protein y66d12a.15, air-2 - protein air-2, cyb-3 - protein cyb-3, dog-1 - protein dog-1, ruvb-2 - protein ruvb-2, coh-3 - protein coh-3, mcm-2 - protein mcm-2, syp-2 - protei…
GO:0044702	single organism reproductive process	6.02e-06	0.00143	1.14	7788	977	4247	605	[CELE_C47E8.6 - protein c47e8.6, homt-1 - protein homt-1, F30A10.9 - protein f30a10.9, rbm-28 - protein rbm-28, usp-48 - protein usp-48, CELE_F58A4.9 - protein f58a4.9, CELE_Y53F4B.13 - protein y53f4b.13, ubc-7 - protein ubc-7, nep-16 - protein nep-16, skr-2 - protein skr-2, bir-2 - protein bir-2, spe-8 - protein spe-8, ima-3 - protein ima-3, ref-2 - protein ref-2, CELE_F53F4.11 - protein f53f4.1…
GO:0043603	cellular amide metabolic process	6.21e-06	0.0014	1.33	7788	210	3907	140	[asm-3 - protein asm-3, eif-3.B - protein eif-3.b, nars-2 - protein nars-2, F53B1.2 - protein f53b1.2, ife-2 - protein ife-2, rps-14 - protein rps-14, eif-1.A - protein eif-1.a, rps-21 - protein rps-21, ears-2 - protein ears-2, rpl-6 - protein rpl-6, mrps-21 - protein mrps-21, pam-1 - protein pam-1, C53D5.5 - protein c53d5.5, mrpl-17 - protein mrpl-17, egl-45 - protein egl-45, mrpl-9 - protein mr…
GO:0022402	cell cycle process	6.55e-06	0.0014	1.31	7788	379	3002	192	[npp-3 - protein npp-3, clk-2 - protein clk-2, duo-1 - protein duo-1, top-2 - protein top-2, syp-1 - protein syp-1, air-1 - protein air-1, mag-1 - protein mag-1, ubc-12 - protein ubc-12, ife-2 - protein ife-2, sas-5 - protein sas-5, sep-1 - protein sep-1, fcd-2 - protein fcd-2, dog-1 - protein dog-1, cec-5 - protein cec-5, ima-3 - protein ima-3, C05C10.5 - protein c05c10.5, syp-2 - protein syp-2,…
GO:0006915	apoptotic process	9.8e-06	0.002	1.35	7788	360	2677	167	[ced-9 - protein ced-9, syp-1 - protein syp-1, eif-3.B - protein eif-3.b, air-1 - protein air-1, imb-3 - protein imb-3, mag-1 - protein mag-1, ubc-9 - protein ubc-9, ubc-12 - protein ubc-12, crn-4 - protein crn-4, eor-1 - protein eor-1, fcd-2 - protein fcd-2, inx-14 - protein inx-14, CELE_Y57G11C.15 - protein y57g11c.15, vps-41 - protein vps-41, dut-1 - protein dut-1, bub-1 - protein bub-1, CELE_…
GO:0043604	amide biosynthetic process	1.02e-05	0.00198	1.31	7788	180	4246	129	[asm-3 - protein asm-3, eif-3.B - protein eif-3.b, nars-2 - protein nars-2, F53B1.2 - protein f53b1.2, ife-2 - protein ife-2, eif-1.A - protein eif-1.a, rps-14 - protein rps-14, rpl-36 - protein rpl-36, rps-21 - protein rps-21, rps-18 - protein rps-18, ears-2 - protein ears-2, rpl-6 - protein rpl-6, mrps-21 - protein mrps-21, mrpl-17 - protein mrpl-17, egl-45 - protein egl-45, mrpl-9 - protein mr…
GO:0008219	cell death	1.05e-05	0.00194	1.33	7788	403	2677	184	[ced-9 - protein ced-9, ggtb-1 - protein ggtb-1, syp-1 - protein syp-1, air-1 - protein air-1, eif-3.B - protein eif-3.b, imb-3 - protein imb-3, mag-1 - protein mag-1, ubc-9 - protein ubc-9, ubc-12 - protein ubc-12, clp-6 - protein clp-6, crn-4 - protein crn-4, inx-14 - protein inx-14, fcd-2 - protein fcd-2, eor-1 - protein eor-1, CELE_Y57G11C.15 - protein y57g11c.15, vps-41 - protein vps-41, dut…
GO:0016265	death	1.05e-05	0.00186	1.33	7788	403	2677	184	[ced-9 - protein ced-9, ggtb-1 - protein ggtb-1, syp-1 - protein syp-1, air-1 - protein air-1, eif-3.B - protein eif-3.b, imb-3 - protein imb-3, mag-1 - protein mag-1, ubc-9 - protein ubc-9, ubc-12 - protein ubc-12, clp-6 - protein clp-6, crn-4 - protein crn-4, inx-14 - protein inx-14, eor-1 - protein eor-1, fcd-2 - protein fcd-2, CELE_Y57G11C.15 - protein y57g11c.15, vps-41 - protein vps-41, dut…
GO:0007059	chromosome segregation	1.45e-05	0.00249	1.43	7788	130	3908	93	[egl-8 - protein egl-8, duo-1 - protein duo-1, top-2 - protein top-2, syp-1 - protein syp-1, F26B1.2 - protein f26b1.2, csc-1 - protein csc-1, smc-4 - protein smc-4, ife-2 - protein ife-2, ess-2 - protein ess-2, skr-2 - protein skr-2, sep-1 - protein sep-1, F33H2.6 - protein f33h2.6, cec-5 - protein cec-5, dog-1 - protein dog-1, dao-5 - protein dao-5, coh-3 - protein coh-3, C05C10.5 - protein c05…
GO:0012501	programmed cell death	2.21e-05	0.00364	1.33	7788	369	2677	169	[ced-9 - protein ced-9, syp-1 - protein syp-1, eif-3.B - protein eif-3.b, air-1 - protein air-1, imb-3 - protein imb-3, mag-1 - protein mag-1, ubc-9 - protein ubc-9, ubc-12 - protein ubc-12, crn-4 - protein crn-4, eor-1 - protein eor-1, fcd-2 - protein fcd-2, inx-14 - protein inx-14, CELE_Y57G11C.15 - protein y57g11c.15, vps-41 - protein vps-41, dut-1 - protein dut-1, bub-1 - protein bub-1, CELE_…
GO:0006974	cellular response to DNA damage stimulus	2.38e-05	0.00377	1.34	7788	191	3707	122	[ced-9 - protein ced-9, B0495.2 - protein b0495.2, clk-2 - protein clk-2, rbm-28 - protein rbm-28, F33H2.5 - protein f33h2.5, exo-3 - protein exo-3, Y66D12A.15 - protein y66d12a.15, fcd-2 - protein fcd-2, dog-1 - protein dog-1, cwn-1 - protein cwn-1, CELE_F42A6.5 - protein f42a6.5, lem-3 - protein lem-3, fln-1 - protein fln-1, CELE_C08H9.3 - protein c08h9.3, C23H4.6 - protein c23h4.6, C04F12.1 - …
GO:0040020	regulation of meiotic nuclear division	5.16e-05	0.00788	1.66	7788	71	3229	49	[dhc-1 - protein dhc-1, egl-8 - protein egl-8, syp-1 - protein syp-1, usp-48 - protein usp-48, sap-49 - protein sap-49, smr-1 - protein smr-1, K04G7.11 - protein k04g7.11, rab-18 - protein rab-18, CELE_Y41E3.11 - protein y41e3.11, syp-2 - protein syp-2, ZK686.4 - protein zk686.4, vbh-1 - protein vbh-1, nos-3 - protein nos-3, abt-2 - protein abt-2, msh-2 - protein msh-2, dnj-22 - protein dnj-22, s…
GO:0051783	regulation of nuclear division	6.03e-05	0.00889	1.61	7788	90	3126	58	[egl-8 - protein egl-8, dhc-1 - protein dhc-1, usp-48 - protein usp-48, syp-1 - protein syp-1, smr-1 - protein smr-1, sap-49 - protein sap-49, K04G7.11 - protein k04g7.11, rab-18 - protein rab-18, CELE_Y41E3.11 - protein y41e3.11, sep-1 - protein sep-1, syp-2 - protein syp-2, ZK686.4 - protein zk686.4, san-1 - protein san-1, vbh-1 - protein vbh-1, fzy-1 - protein fzy-1, nos-3 - protein nos-3, abt…
GO:1903046	meiotic cell cycle process	9.07e-05	0.0129	1.59	7788	177	1876	68	[egl-8 - protein egl-8, duo-1 - protein duo-1, syp-1 - protein syp-1, scc-1 - protein scc-1, F26B1.2 - protein f26b1.2, csc-1 - protein csc-1, ife-2 - protein ife-2, sep-1 - protein sep-1, Y71G12B.27 - protein y71g12b.27, dog-1 - protein dog-1, ima-3 - protein ima-3, C05C10.5 - protein c05c10.5, coh-3 - protein coh-3, syp-2 - protein syp-2, kel-8 - protein kel-8, lin-5 - protein lin-5, fln-1 - pr…
GO:0034470	ncRNA processing	0.000101	0.014	1.43	7788	84	4267	66	[F30A10.9 - protein f30a10.9, nol-5 - protein nol-5, F52H3.2 - protein f52h3.2, K01G5.5 - protein k01g5.5, F48E8.6 - protein f48e8.6, B0035.16 - protein b0035.16, crn-4 - protein crn-4, frg-1 - protein frg-1, lsm-6 - protein lsm-6, rps-21 - protein rps-21, clpf-1 - protein clpf-1, nol-6 - protein nol-6, exos-2 - protein exos-2, K07C5.4 - protein k07c5.4, Y66H1A.4 - protein y66h1a.4, mut-7 - prote…
GO:0048468	cell development	0.000102	0.0136	1.44	7788	326	1788	108	[syp-1 - protein syp-1, mag-1 - protein mag-1, CELE_Y41E3.1 - protein y41e3.1, sas-5 - protein sas-5, CELE_Y41E3.11 - protein y41e3.11, tig-3 - protein tig-3, ima-3 - protein ima-3, nex-3 - protein nex-3, riok-1 - protein riok-1, ZK686.4 - protein zk686.4, eri-1 - protein eri-1, vbh-1 - protein vbh-1, kgb-1 - protein kgb-1, smn-1 - protein smn-1, CELE_F38E11.5 - protein f38e11.5, rsp-8 - protein …
GO:0010501	RNA secondary structure unwinding	0.000103	0.0134	2.86	7788	24	1816	16	[F58E10.3 - protein f58e10.3, Y55F3BR.1 - protein y55f3br.1, CELE_F53H1.1 - protein f53h1.1, CELE_T26G10.1 - protein t26g10.1, ddx-19 - protein ddx-19, B0511.6 - protein b0511.6, glh-2 - protein glh-2, Y23H5B.6 - protein y23h5b.6, C46F11.4 - protein c46f11.4, glh-3 - protein glh-3, ddx-23 - protein ddx-23, Y65B4A.6 - protein y65b4a.6, vbh-1 - protein vbh-1, mel-46 - protein mel-46, glh-1 - protei…
GO:0044265	cellular macromolecule catabolic process	0.000113	0.0143	1.35	7788	150	4045	105	[Y50D4B.4 - protein y50d4b.4, duo-1 - protein duo-1, usp-48 - protein usp-48, Y50D4B.7 - protein y50d4b.7, F48E8.6 - protein f48e8.6, K10C9.3 - protein k10c9.3, ubc-7 - protein ubc-7, skr-2 - protein skr-2, crn-4 - protein crn-4, lem-3 - protein lem-3, T20D4.4 - protein t20d4.4, R151.6 - protein r151.6, T20D4.5 - protein t20d4.5, rpt-4 - protein rpt-4, eri-1 - protein eri-1, skr-17 - protein skr-…
GO:0051052	regulation of DNA metabolic process	0.000138	0.0168	3.01	7788	14	2221	12	[msh-6 - protein msh-6, mus-101 - protein mus-101, syp-2 - protein syp-2, syp-1 - protein syp-1, CELE_F23C8.9 - protein f23c8.9, pcn-1 - protein pcn-1, msh-2 - protein msh-2, mut-7 - protein mut-7, mut-2 - protein mut-2, fcd-2 - protein fcd-2, figl-1 - protein figl-1, dog-1 - protein dog-1]
GO:0098813	nuclear chromosome segregation	0.000142	0.0168	1.41	7788	116	3846	81	[egl-8 - protein egl-8, top-2 - protein top-2, duo-1 - protein duo-1, syp-1 - protein syp-1, F26B1.2 - protein f26b1.2, csc-1 - protein csc-1, ife-2 - protein ife-2, smc-4 - protein smc-4, ess-2 - protein ess-2, skr-2 - protein skr-2, sep-1 - protein sep-1, F33H2.6 - protein f33h2.6, dog-1 - protein dog-1, cec-5 - protein cec-5, dao-5 - protein dao-5, coh-3 - protein coh-3, C05C10.5 - protein c05…
GO:0010564	regulation of cell cycle process	0.000142	0.0164	1.47	7788	123	3320	77	[egl-8 - protein egl-8, dhc-1 - protein dhc-1, usp-48 - protein usp-48, syp-1 - protein syp-1, sap-49 - protein sap-49, air-1 - protein air-1, smr-1 - protein smr-1, K04G7.11 - protein k04g7.11, rab-18 - protein rab-18, CELE_Y41E3.11 - protein y41e3.11, sep-1 - protein sep-1, bmk-1 - protein bmk-1, syp-2 - protein syp-2, CELE_F42A6.5 - protein f42a6.5, gen-1 - protein gen-1, dsh-2 - protein dsh-2…
GO:0044260	cellular macromolecule metabolic process	0.000176	0.0198	1.09	7788	1687	4174	982	[homt-1 - protein homt-1, Y50D4B.4 - protein y50d4b.4, nhr-13 - protein nhr-13, CELE_F58A4.9 - protein f58a4.9, ubc-7 - protein ubc-7, spe-8 - protein spe-8, nhr-187 - protein nhr-187, ref-2 - protein ref-2, mut-7 - protein mut-7, nhr-96 - protein nhr-96, nhr-18 - protein nhr-18, taf-4 - protein taf-4, rars-2 - protein rars-2, gly-7 - protein gly-7, CELE_T26G10.1 - protein t26g10.1, hlh-8 - prote…
GO:0033043	regulation of organelle organization	0.000177	0.0194	1.86	7788	161	1092	42	[egl-8 - protein egl-8, mat-3 - protein mat-3, gld-3 - protein gld-3, mig-5 - protein mig-5, prp-21 - protein prp-21, T08A11.2 - protein t08a11.2, syp-1 - protein syp-1, sap-49 - protein sap-49, lag-2 - protein lag-2, rab-18 - protein rab-18, tim-1 - protein tim-1, apx-1 - protein apx-1, CELE_Y41E3.11 - protein y41e3.11, sep-1 - protein sep-1, cyb-3 - protein cyb-3, vps-41 - protein vps-41, arx-7…
GO:0048869	cellular developmental process	0.000213	0.0228	1.44	7788	559	1094	113	[syp-1 - protein syp-1, CELE_Y41E3.1 - protein y41e3.1, CELE_F23C8.7 - protein f23c8.7, sas-5 - protein sas-5, CELE_Y41E3.11 - protein y41e3.11, tig-3 - protein tig-3, ash-2 - protein ash-2, ref-2 - protein ref-2, mom-2 - protein mom-2, dsh-2 - protein dsh-2, tap-1 - protein tap-1, vbh-1 - protein vbh-1, eri-1 - protein eri-1, rsp-8 - protein rsp-8, asfl-1 - protein asfl-1, R11E3.1 - protein r11e…
GO:0006950	response to stress	0.000224	0.0234	3.74	7788	660	41	13	[piki-1 - protein piki-1, F52G3.3 - protein f52g3.3, vit-2 - protein vit-2, dcs-1 - protein dcs-1, unc-78 - protein unc-78, agt-1 - protein agt-1, vit-5 - protein vit-5, clec-80 - protein clec-80, eel-1 - protein eel-1, vit-6 - protein vit-6, fln-1 - protein fln-1, CELE_C08H9.3 - protein c08h9.3, vit-4 - protein vit-4]
GO:0040021	hermaphrodite germ-line sex determination	0.000241	0.0245	2.48	7788	36	1742	20	[egl-8 - protein egl-8, gld-3 - protein gld-3, nos-3 - protein nos-3, sap-49 - protein sap-49, D2045.5 - protein d2045.5, mag-1 - protein mag-1, rab-18 - protein rab-18, mog-5 - protein mog-5, fem-1 - protein fem-1, fbf-2 - protein fbf-2, mog-4 - protein mog-4, prp-17 - protein prp-17, ddx-23 - protein ddx-23, gld-1 - protein gld-1, cyn-4 - protein cyn-4, puf-8 - protein puf-8, vbh-1 - protein vb…
GO:0002119	nematode larval development	0.000248	0.0246	1.09	7788	1458	4307	878	[homt-1 - protein homt-1, rpl-7 - protein rpl-7, F56C11.6 - protein f56c11.6, ref-2 - protein ref-2, ZK1098.1 - protein zk1098.1, miro-2 - protein miro-2, mut-7 - protein mut-7, xpo-2 - protein xpo-2, taf-4 - protein taf-4, CELE_T26G10.1 - protein t26g10.1, spk-1 - protein spk-1, cutl-13 - protein cutl-13, col-157 - protein col-157, deps-1 - protein deps-1, Y65B4BR.5 - protein y65b4br.5, Y65B4A.8…
GO:0051785	positive regulation of nuclear division	0.000265	0.0257	4.03	7788	9	1717	8	[gld-3 - protein gld-3, nos-3 - protein nos-3, syp-1 - protein syp-1, syp-2 - protein syp-2, ZK430.5 - protein zk430.5, prg-1 - protein prg-1, sep-1 - protein sep-1, cyb-3 - protein cyb-3]
GO:0002164	larval development	0.000279	0.0265	1.09	7788	1459	4307	878	[homt-1 - protein homt-1, rpl-7 - protein rpl-7, F56C11.6 - protein f56c11.6, ref-2 - protein ref-2, ZK1098.1 - protein zk1098.1, miro-2 - protein miro-2, mut-7 - protein mut-7, xpo-2 - protein xpo-2, taf-4 - protein taf-4, CELE_T26G10.1 - protein t26g10.1, spk-1 - protein spk-1, cutl-13 - protein cutl-13, deps-1 - protein deps-1, col-157 - protein col-157, Y65B4BR.5 - protein y65b4br.5, Y65B4A.8…
GO:0050896	response to stimulus	0.000292	0.0272	3.43	7788	775	41	14	[F52G3.3 - protein f52g3.3, egl-8 - protein egl-8, vit-2 - protein vit-2, piki-1 - protein piki-1, dcs-1 - protein dcs-1, unc-78 - protein unc-78, vit-5 - protein vit-5, agt-1 - protein agt-1, clec-80 - protein clec-80, eel-1 - protein eel-1, fln-1 - protein fln-1, vit-6 - protein vit-6, CELE_C08H9.3 - protein c08h9.3, vit-4 - protein vit-4]
GO:0009791	post-embryonic development	0.000329	0.0299	1.09	7788	1469	4307	883	[homt-1 - protein homt-1, rpl-7 - protein rpl-7, F56C11.6 - protein f56c11.6, ref-2 - protein ref-2, ZK1098.1 - protein zk1098.1, miro-2 - protein miro-2, mut-7 - protein mut-7, xpo-2 - protein xpo-2, taf-4 - protein taf-4, CELE_T26G10.1 - protein t26g10.1, spk-1 - protein spk-1, cutl-13 - protein cutl-13, col-157 - protein col-157, deps-1 - protein deps-1, Y65B4BR.5 - protein y65b4br.5, Y65B4A.8…
GO:0051302	regulation of cell division	0.000351	0.0313	1.51	7788	114	2980	66	[dhc-1 - protein dhc-1, egl-8 - protein egl-8, usp-48 - protein usp-48, syp-1 - protein syp-1, air-1 - protein air-1, sap-49 - protein sap-49, smr-1 - protein smr-1, K04G7.11 - protein k04g7.11, rab-18 - protein rab-18, CELE_Y41E3.11 - protein y41e3.11, sep-1 - protein sep-1, syp-2 - protein syp-2, ZK686.4 - protein zk686.4, san-1 - protein san-1, cpg-1 - protein cpg-1, vbh-1 - protein vbh-1, fzy…
GO:0000280	nuclear division	0.000391	0.0341	1.61	7788	158	1717	56	[syp-1 - protein syp-1, ran-1 - protein ran-1, scc-1 - protein scc-1, F26B1.2 - protein f26b1.2, smc-4 - protein smc-4, sep-1 - protein sep-1, Y71G12B.27 - protein y71g12b.27, ima-3 - protein ima-3, coh-3 - protein coh-3, syp-2 - protein syp-2, kel-8 - protein kel-8, lin-5 - protein lin-5, fln-1 - protein fln-1, tac-1 - protein tac-1, klp-16 - protein klp-16, klp-15 - protein klp-15, kgb-1 - prot…
GO:0048285	organelle fission	0.000399	0.0341	1.35	7788	160	3396	94	[dhc-1 - protein dhc-1, fbxa-6 - protein fbxa-6, tbb-1 - protein tbb-1, syp-1 - protein syp-1, ran-1 - protein ran-1, scc-1 - protein scc-1, F26B1.2 - protein f26b1.2, csc-1 - protein csc-1, smc-4 - protein smc-4, ess-2 - protein ess-2, sep-1 - protein sep-1, Y71G12B.27 - protein y71g12b.27, coh-3 - protein coh-3, cks-1 - protein cks-1, ima-3 - protein ima-3, syp-2 - protein syp-2, kel-8 - protei…
GO:0040029	regulation of gene expression, epigenetic	0.000433	0.0363	1.58	7788	133	2292	62	[sin-3 - protein sin-3, zhit-1 - protein zhit-1, CELE_R03D7.4 - protein r03d7.4, tsn-1 - protein tsn-1, spr-5 - protein spr-5, phf-30 - protein phf-30, CELE_Y71G10AL.1 - protein y71g10al.1, ima-3 - protein ima-3, F59A3.4 - protein f59a3.4, lin-5 - protein lin-5, sdc-1 - protein sdc-1, ncl-1 - protein ncl-1, mom-2 - protein mom-2, mut-7 - protein mut-7, xpo-2 - protein xpo-2, eri-1 - protein eri-1…
GO:1903047	mitotic cell cycle process	0.000437	0.036	1.73	7788	199	1083	48	[ama-1 - protein ama-1, gld-3 - protein gld-3, mig-5 - protein mig-5, swsn-6 - protein swsn-6, ran-1 - protein ran-1, scc-1 - protein scc-1, par-2 - protein par-2, cpar-1 - protein cpar-1, lst-4 - protein lst-4, plk-1 - protein plk-1, tim-1 - protein tim-1, sas-5 - protein sas-5, sep-1 - protein sep-1, npp-1 - protein npp-1, cyb-3 - protein cyb-3, lig-1 - protein lig-1, bmk-1 - protein bmk-1, cdk…
GO:0022414	reproductive process	0.000527	0.0425	1.11	7788	1208	3715	640	[CELE_C47E8.6 - protein c47e8.6, F30A10.9 - protein f30a10.9, usp-48 - protein usp-48, rbm-28 - protein rbm-28, nol-10 - protein nol-10, CELE_F58A4.9 - protein f58a4.9, CELE_Y53F4B.13 - protein y53f4b.13, ubc-7 - protein ubc-7, spe-8 - protein spe-8, ima-3 - protein ima-3, ref-2 - protein ref-2, CELE_F53F4.11 - protein f53f4.11, ZK1098.1 - protein zk1098.1, dut-1 - protein dut-1, C46H11.6 - prote…
GO:0051726	regulation of cell cycle	0.000534	0.0423	1.32	7788	196	3320	110	[top-2 - protein top-2, usp-48 - protein usp-48, syp-1 - protein syp-1, air-1 - protein air-1, K04G7.11 - protein k04g7.11, CELE_Y41E3.11 - protein y41e3.11, sep-1 - protein sep-1, fcd-2 - protein fcd-2, syp-2 - protein syp-2, CELE_F42A6.5 - protein f42a6.5, dsh-2 - protein dsh-2, ZK686.4 - protein zk686.4, vbh-1 - protein vbh-1, fzy-1 - protein fzy-1, taf-4 - protein taf-4, sun-1 - protein sun-1…
GO:0006364	rRNA processing	0.000549	0.0427	1.5	7788	51	4267	42	[F30A10.9 - protein f30a10.9, nol-5 - protein nol-5, K01G5.5 - protein k01g5.5, F48E8.6 - protein f48e8.6, frg-1 - protein frg-1, crn-4 - protein crn-4, CELE_F19F10.9 - protein f19f10.9, lsm-6 - protein lsm-6, rps-21 - protein rps-21, nol-6 - protein nol-6, F13H8.2 - protein f13h8.2, exos-2 - protein exos-2, K07C5.4 - protein k07c5.4, Y66H1A.4 - protein y66h1a.4, eri-1 - protein eri-1, F52C12.2 -…
GO:0016072	rRNA metabolic process	0.000549	0.0419	1.5	7788	51	4267	42	[F30A10.9 - protein f30a10.9, nol-5 - protein nol-5, K01G5.5 - protein k01g5.5, F48E8.6 - protein f48e8.6, frg-1 - protein frg-1, crn-4 - protein crn-4, CELE_F19F10.9 - protein f19f10.9, lsm-6 - protein lsm-6, rps-21 - protein rps-21, nol-6 - protein nol-6, F13H8.2 - protein f13h8.2, exos-2 - protein exos-2, K07C5.4 - protein k07c5.4, Y66H1A.4 - protein y66h1a.4, eri-1 - protein eri-1, F52C12.2 -…
GO:0000018	regulation of DNA recombination	0.000567	0.0426	3.68	7788	7	2118	7	[msh-6 - protein msh-6, syp-2 - protein syp-2, syp-1 - protein syp-1, msh-2 - protein msh-2, mut-7 - protein mut-7, mut-2 - protein mut-2, figl-1 - protein figl-1]
GO:0010608	posttranscriptional regulation of gene expression	0.000568	0.0419	1.27	7788	162	4251	112	[eif-3.B - protein eif-3.b, nrde-3 - protein nrde-3, ife-2 - protein ife-2, paa-1 - protein paa-1, ima-3 - protein ima-3, lin-5 - protein lin-5, F59A3.4 - protein f59a3.4, ncl-1 - protein ncl-1, mom-2 - protein mom-2, mut-7 - protein mut-7, mrp-1 - protein mrp-1, eri-1 - protein eri-1, xpo-2 - protein xpo-2, egl-45 - protein egl-45, mut-2 - protein mut-2, npp-9 - protein npp-9, C04F12.1 - protein…
GO:0007049	cell cycle	0.000581	0.0421	1.36	7788	105	4185	77	[air-1 - protein air-1, ran-1 - protein ran-1, scc-1 - protein scc-1, lin-54 - protein lin-54, daf-21 - protein daf-21, csc-1 - protein csc-1, smc-4 - protein smc-4, sas-5 - protein sas-5, Y71G12B.27 - protein y71g12b.27, ddb-1 - protein ddb-1, Y39H10A.6 - protein y39h10a.6, cks-1 - protein cks-1, mei-1 - protein mei-1, lin-5 - protein lin-5, Y43F4A.1 - protein y43f4a.1, cpg-1 - protein cpg-1, sa…
GO:0016441	posttranscriptional gene silencing	0.000621	0.0443	1.65	7788	113	2176	52	[sin-3 - protein sin-3, zhit-1 - protein zhit-1, CELE_R03D7.4 - protein r03d7.4, tsn-1 - protein tsn-1, phf-30 - protein phf-30, CELE_Y71G10AL.1 - protein y71g10al.1, ima-3 - protein ima-3, lin-5 - protein lin-5, F59A3.4 - protein f59a3.4, ncl-1 - protein ncl-1, mom-2 - protein mom-2, mut-7 - protein mut-7, xpo-2 - protein xpo-2, eri-1 - protein eri-1, mrp-1 - protein mrp-1, mut-2 - protein mut-2…
GO:0035194	posttranscriptional gene silencing by RNA	0.000621	0.0436	1.65	7788	113	2176	52	[sin-3 - protein sin-3, zhit-1 - protein zhit-1, CELE_R03D7.4 - protein r03d7.4, tsn-1 - protein tsn-1, phf-30 - protein phf-30, CELE_Y71G10AL.1 - protein y71g10al.1, ima-3 - protein ima-3, F59A3.4 - protein f59a3.4, lin-5 - protein lin-5, ncl-1 - protein ncl-1, mom-2 - protein mom-2, mut-7 - protein mut-7, xpo-2 - protein xpo-2, eri-1 - protein eri-1, mrp-1 - protein mrp-1, mut-2 - protein mut-2…
GO:0006413	translational initiation	0.000677	0.0467	1.68	7788	28	4133	25	[ife-3 - protein ife-3, eif-3.B - protein eif-3.b, iffb-1 - protein iffb-1, eif-1.A - protein eif-1.a, ife-2 - protein ife-2, C03H5.5 - protein c03h5.5, eif-3.J - protein eif-3.j, eif-3.I - protein eif-3.i, ife-4 - protein ife-4, Y37E3.10 - protein y37e3.10, eif-3.C - protein eif-3.c, E04D5.1 - protein e04d5.1, eif-3.F - protein eif-3.f, vbh-1 - protein vbh-1, F57B9.3 - protein f57b9.3, egl-45 - …
GO:0034641	cellular nitrogen compound metabolic process	0.000678	0.046	1.09	7788	1240	4246	739	[F30A10.9 - protein f30a10.9, eif-3.B - protein eif-3.b, nhr-13 - protein nhr-13, CELE_Y53F4B.13 - protein y53f4b.13, CELE_F58A4.9 - protein f58a4.9, nhr-187 - protein nhr-187, ref-2 - protein ref-2, lem-3 - protein lem-3, CELE_F53F4.14 - protein f53f4.14, CELE_Y18D10A.3 - protein y18d10a.3, dut-1 - protein dut-1, pam-1 - protein pam-1, C53D5.5 - protein c53d5.5, ahr-1 - protein ahr-1, nhr-27 - p…
GO:0061038	uterus morphogenesis	0.000759	0.0507	1947	7788	2	2	1	[fln-1 - protein fln-1]
GO:0018992	germ-line sex determination	0.00076	0.05	2.29	7788	41	1742	21	[egl-8 - protein egl-8, gld-3 - protein gld-3, nos-3 - protein nos-3, D2045.5 - protein d2045.5, sap-49 - protein sap-49, mag-1 - protein mag-1, rab-18 - protein rab-18, tra-3 - protein tra-3, mog-5 - protein mog-5, fem-1 - protein fem-1, fbf-2 - protein fbf-2, mog-4 - protein mog-4, prp-17 - protein prp-17, ddx-23 - protein ddx-23, gld-1 - protein gld-1, cyn-4 - protein cyn-4, puf-8 - protein pu…
GO:0048665	neuron fate specification	0.000863	0.0559	5.44	7788	8	1074	6	[ceh-36 - protein ceh-36, ceh-37 - protein ceh-37, ref-2 - protein ref-2, sop-2 - protein sop-2, fax-1 - protein fax-1, fkh-2 - protein fkh-2]
GO:0006281	DNA repair	0.000884	0.0564	1.46	7788	82	3707	57	[polk-1 - protein polk-1, F33H2.5 - protein f33h2.5, Y66D12A.15 - protein y66d12a.15, exo-3 - protein exo-3, fcd-2 - protein fcd-2, dog-1 - protein dog-1, CELE_F42A6.5 - protein f42a6.5, gen-1 - protein gen-1, xpc-1 - protein xpc-1, CELE_C08H9.3 - protein c08h9.3, fan-1 - protein fan-1, C23H4.6 - protein c23h4.6, rps-3 - protein rps-3, F52G3.3 - protein f52g3.3, xnp-1 - protein xnp-1, slx-1 - pro…
GO:0045132	meiotic chromosome segregation	0.000889	0.0559	1.41	7788	98	3846	68	[egl-8 - protein egl-8, duo-1 - protein duo-1, syp-1 - protein syp-1, F26B1.2 - protein f26b1.2, csc-1 - protein csc-1, ife-2 - protein ife-2, skr-2 - protein skr-2, ess-2 - protein ess-2, sep-1 - protein sep-1, F33H2.6 - protein f33h2.6, cec-5 - protein cec-5, dog-1 - protein dog-1, dao-5 - protein dao-5, C05C10.5 - protein c05c10.5, coh-3 - protein coh-3, syp-2 - protein syp-2, mei-1 - protein …
GO:0006399	tRNA metabolic process	0.000983	0.0609	1.48	7788	57	4161	45	[cars-1 - protein cars-1, CELE_Y105E8A.19 - protein y105e8a.19, CELE_W02A11.1 - protein w02a11.1, moc-3 - protein moc-3, nars-2 - protein nars-2, aars-1 - protein aars-1, C45G9.2 - protein c45g9.2, F52H3.2 - protein f52h3.2, B0035.16 - protein b0035.16, hars-1 - protein hars-1, F36A2.2 - protein f36a2.2, lars-1 - protein lars-1, Y102E9.2 - protein y102e9.2, clpf-1 - protein clpf-1, Y49A3A.3 - pro…
GO:0016246	RNA interference	0.000998	0.0609	1.63	7788	112	2176	51	[sin-3 - protein sin-3, zhit-1 - protein zhit-1, CELE_R03D7.4 - protein r03d7.4, phf-30 - protein phf-30, CELE_Y71G10AL.1 - protein y71g10al.1, ima-3 - protein ima-3, lin-5 - protein lin-5, F59A3.4 - protein f59a3.4, ncl-1 - protein ncl-1, mom-2 - protein mom-2, mut-7 - protein mut-7, xpo-2 - protein xpo-2, eri-1 - protein eri-1, mrp-1 - protein mrp-1, mut-2 - protein mut-2, npp-9 - protein npp-9…
