# Supplementary material for: Chromatin accessibility dynamics reveal novel functional enhancers in C. elegans
Source: Genome Res. 2017 Dec;27(12):2096–107. doi: 10.1101/gr.226233.117 (PMC5741055; doi:10.1101/gr.226233.117)
Supplement: Supplemental Material [file supp_gr.226233.117_Supplemental_Table_S8.xlsx]

## Sheet: S8 - Histone Mod ChIP-seqs
Downloaded as aligned BAMs from http://encode-x.med.harvard.edu/data_sets/
factor_stage	rep1_treatment(antibody_factor_stage+extract)	rep1_control	rep2_treatment(antibody_factor_stage+extract)	rep2_control
H3K79me2_L3	ab3594_H3K79me2_L3mE5.input.bam	L3_mE5_input.bam	ab3594_H3K79me2_L3mE6.input.bam	L3_mE6_input.bam
H3K4me1_L3	ab8895_H3K4me1_L3mE5.bam	L3_mE5_input.bam	ab8895_H3K4me1_L3mE6.bam	L3_mE6_input.bam
H3K36me3_L3	AB9050_H3K36me3_L3_1.bam	seq-NA_N2_L3_1_E77.bam	AB9050_H3K36me3_L3_7.bam	seq-NA_N2_L3_IL-1.bam
H4K20me1_L3	DISN147_H4K20me1_L3mE5.bam	L3_mE5_input.bam	DISN147_H4K20me1_L3fE1.bam	L3_fE1_input.bam
H3K9me3_L3	HK00009_H3K9me3_L3mE5.bam	L3_mE5_input.bam	HK00009_H3K9me3_L3fE1.bam	L3_fE1_input.bam
H3K27me3_L3	HK00013_H3K27me3_L3mE5.bam	L3_mE5_input.bam	HK00013_H3K27me3_L3mE6.bam	L3_mE6_input.bam
H3K4me3_L3	WA30534819_H3K4me3_N2_L3_1.bam	seq-NA_N2_L3_2.bam	WA30534819_H3K4me3_N2_L3_2.bam	seq-NA_N2_L3_IL-2.bam
H3K27ac_L3	WA30634849_H3K27ac_L3mE5.bam	L3_mE5_input.bam	WA30634849_H3K27ac_L3fE1.bam	L3_fE1_input.bam
H3K27ac_EE	WA30634849_H3K27ac_Eemb13A.bam	Input_Eemb13A.bam	WA30634849_H3K27ac_Eemb14A.bam	Input_Eemb14A.bam
H3K27me3_EE	HK00013_H3K27me3_Eemb13A.bam	Input_Eemb13A.bam	HK00013_H3K27me3_Eemb14A.bam	Input_Eemb14A.bam
H3K36me3_EE	HK00001_H3K36me3_Eemb13A.bam	Input_Eemb13A.bam	HK00001_H3K36me3_Eemb14A.bam	Input_Eemb14A.bam
H3K4me1_EE	AB8895_H3K4me1_Eemb13A.bam	Input_Eemb13A.bam	AB8895_H3K4me1_Eemb14A.bam	Input_Eemb14A.bam
H3K4me3_EE	WA30534819_H3K4me3_Eemb13A.bam	Input_Eemb13A.bam	WA30534819_H3K4me3_Eemb14A.bam	Input_Eemb14A.bam
H3K79me2_EE	ab3594_H3K79me2_Eemb13A.bam	Input_Eemb13A.bam	ab3594_H3K79me2_Eemb14A.bam	Input_Eemb14A.bam
H3K9me3_EE	HK00009_H3K9me3_Eemb13A.bam	Input_Eemb13A.bam	HK00009_H3K9me3_Eemb14A.bam	Input_Eemb14A.bam
H4K20me1_EE	DISN147_H4K20me1_Eemb13A.bam	Input_Eemb13A.bam	DISN147_H4K20me1_Eemb14A.bam	Input_Eemb14A.bam
Downloaded as FASTQ files from http://data.modencode.org/
ModEncode DCC id	Target	Stage	Reps	Inputs
6256	H3K36me3	YA_fem-2(b245)	2	2
6254	H3K27me3	YA_fem-2(b245)	2	2
6246	H3K4me1	YA_fem-2(b245)	2	2
5173	H3K79me3	YA_fem-2(b245)	2	2
3921	H3K27ac	YA_fem-2(b245)	2	2
