# Supplementary material for: Chromatin accessibility dynamics reveal novel functional enhancers in C. elegans
Source: Genome Res. 2017 Dec;27(12):2096–107. doi: 10.1101/gr.226233.117 (PMC5741055; doi:10.1101/gr.226233.117)
Supplement: Supplemental Material [file supp_gr.226233.117_Supplemental_Table_S9.xlsx]

## Sheet: S9 - EE ChromHMM predictions
chrIII	0	800	Low signal
chrIII	800	1000	Repressed enhancer
chrIII	1000	1100	H3K27me3 repressed
chrIII	1100	1600	Low signal
chrIII	1600	1900	H3K27me3 repressed
chrIII	1900	2600	Low signal
chrIII	2600	3000	H3K27me3 repressed
chrIII	3000	3300	Low signal
chrIII	3300	3400	H3K27me3 repressed
chrIII	3400	3800	Low signal
chrIII	3800	4100	H3K27me3 repressed
chrIII	4100	6100	Low signal
chrIII	6100	8300	Low signal
chrIII	8300	8400	Repressed enhancer
chrIII	8400	9000	Low signal
chrIII	9000	9200	Low signal
chrIII	9200	9300	H3K27me3 repressed
chrIII	9300	10900	Low signal
chrIII	10900	11100	H3K27me3 repressed
chrIII	11100	11700	Low signal
chrIII	11700	11800	H3K27me3 repressed
chrIII	11800	12300	Low signal
chrIII	12300	12400	H3K27me3 repressed
chrIII	12400	12700	Low signal
chrIII	12700	13300	H3K27me3 repressed
chrIII	13300	13500	Low signal
chrIII	13500	13700	H3K27me3 repressed
chrIII	13700	13900	Low signal
chrIII	13900	14700	H3K27me3 repressed
chrIII	14700	14900	Low signal
chrIII	14900	15000	H3K27me3 repressed
chrIII	15000	15200	Low signal
chrIII	15200	15500	H3K27me3 repressed
chrIII	15500	15700	Low signal
chrIII	15700	15900	TSS/Promoter
chrIII	15900	16800	Low signal
chrIII	16800	16900	Repressed enhancer
chrIII	16900	17500	Low signal
chrIII	17500	18400	Repressed enhancer
chrIII	18400	18500	Low signal
chrIII	18500	18600	H3K27me3 repressed
chrIII	18600	18900	Repressed enhancer
chrIII	18900	19000	H3K27me3 repressed
chrIII	19000	19300	Low signal
chrIII	19300	19900	H3K27me3 repressed
chrIII	19900	21100	Low signal
chrIII	21100	21800	H3K27me3 repressed
chrIII	21800	22600	Low signal
chrIII	22600	23100	H3K27me3 repressed
chrIII	23100	23700	Repressed enhancer
chrIII	23700	23900	Low signal
chrIII	23900	24000	Repressed enhancer
chrIII	24000	24500	Low signal
chrIII	24500	24700	Repressed enhancer
chrIII	24700	25100	Low signal
chrIII	25100	25200	Repressed enhancer
chrIII	25200	25300	Low signal
chrIII	25300	25400	Active enhancer
chrIII	25400	26100	Active enhancer
chrIII	26100	26400	Repressed enhancer
chrIII	26400	26500	H3K27me3 repressed
chrIII	26500	26600	Low signal
chrIII	26600	26700	H3K27me3 repressed
chrIII	26700	28700	Low signal
chrIII	28700	29100	H3K27me3 repressed
chrIII	29100	31100	Low signal
chrIII	31100	31200	H3K27me3 repressed
chrIII	31200	32800	Low signal
chrIII	32800	33000	Low signal
chrIII	33000	33200	Repressed enhancer
chrIII	33200	33700	Low signal
chrIII	33700	34000	Active enhancer
chrIII	34000	34500	Low signal
chrIII	34500	34600	Repressed enhancer
chrIII	34600	35000	H3K27me3 repressed
chrIII	35000	35200	Low signal
chrIII	35200	35300	H3K27me3 repressed
chrIII	35300	35600	Low signal
chrIII	35600	35800	H3K27me3 repressed
chrIII	35800	36100	Low signal
chrIII	36100	36400	H3K27me3 repressed
chrIII	36400	37000	Low signal
chrIII	37000	37500	H3K27me3 repressed
chrIII	37500	37700	Low signal
chrIII	37700	38300	H3K27me3 repressed
chrIII	38300	38900	Low signal
chrIII	38900	39200	Low signal
chrIII	39200	39500	Repressed enhancer
chrIII	39500	39600	Low signal
chrIII	39600	40000	Active enhancer
chrIII	40000	40200	Active enhancer
chrIII	40200	40800	Low signal
chrIII	40800	41200	H3K27me3 repressed
chrIII	41200	43200	Heterochromatin
chrIII	43200	43600	Heterochromatin
chrIII	43600	43700	H3K27me3 repressed
chrIII	43700	43800	Low signal
chrIII	43800	43900	H3K27me3 repressed
chrIII	43900	45200	Low signal
chrIII	45200	45300	H3K27me3 repressed
chrIII	45300	45600	Heterochromatin
chrIII	45600	46100	Low signal
chrIII	46100	46800	H3K27me3 repressed
chrIII	46800	47000	Low signal
chrIII	47000	47100	H3K27me3 repressed
chrIII	47100	47700	Low signal
chrIII	47700	48000	H3K27me3 repressed
chrIII	48000	48400	Low signal
chrIII	48400	48700	H3K27me3 repressed
chrIII	48700	49200	Low signal
chrIII	49200	49600	H3K27me3 repressed
chrIII	49600	49800	Low signal
chrIII	49800	50000	H3K27me3 repressed
chrIII	50000	50500	Low signal
chrIII	50500	51600	H3K27me3 repressed
chrIII	51600	51800	Low signal
chrIII	51800	51900	H3K27me3 repressed
chrIII	51900	52300	Low signal
chrIII	52300	52400	H3K27me3 repressed
chrIII	52400	52700	Low signal
chrIII	52700	52800	Repressed enhancer
chrIII	52800	52900	Low signal
chrIII	52900	53000	H3K27me3 repressed
chrIII	53000	53800	Low signal
chrIII	53800	54100	H3K27me3 repressed
chrIII	54100	55400	Low signal
chrIII	55400	55500	Repressed enhancer
chrIII	55500	56200	Low signal
chrIII	56200	56300	Low signal
chrIII	56300	57200	Low signal
chrIII	57200	58800	Heterochromatin
chrIII	58800	58900	H3K27me3 repressed
chrIII	58900	59400	Heterochromatin
chrIII	59400	59800	H3K27me3 repressed
chrIII	59800	59900	Heterochromatin
chrIII	59900	60200	Heterochromatin
chrIII	60200	60700	Heterochromatin
chrIII	60700	60800	Heterochromatin
chrIII	60800	62100	Heterochromatin
chrIII	62100	62300	Heterochromatin
chrIII	62300	62900	Heterochromatin
chrIII	62900	64400	Heterochromatin
chrIII	64400	64700	Heterochromatin
chrIII	64700	66600	Heterochromatin
chrIII	66600	67300	Low signal
chrIII	67300	67500	H3K27me3 repressed
chrIII	67500	68700	Low signal
chrIII	68700	68900	Low signal
chrIII	68900	70800	Transcribed gene body
chrIII	70800	71200	Low signal
chrIII	71200	75900	Transcribed gene body
chrIII	75900	76400	Low signal
chrIII	76400	78700	Transcribed gene body
chrIII	78700	79700	Low signal
chrIII	79700	82900	Transcribed gene body
chrIII	82900	83300	Transcribed gene body
chrIII	83300	84000	Transcribed gene body
chrIII	84000	84100	Transcribed gene body
chrIII	84100	84600	Transcribed gene body
chrIII	84600	85200	Transcribed gene body
chrIII	85200	85600	Transcribed gene body
chrIII	85600	85700	Transcribed gene body
chrIII	85700	86300	TSS/Promoter
chrIII	86300	86400	TSS/Promoter
chrIII	86400	86700	TSS/Promoter
chrIII	86700	86800	TSS/Promoter
chrIII	86800	87000	TSS/Promoter
chrIII	87000	87200	TSS/Promoter
chrIII	87200	87600	TSS/Promoter
chrIII	87600	88200	TSS/Promoter
chrIII	88200	88600	Transcribed gene body
chrIII	88600	88700	Transcribed gene body
chrIII	88700	89700	Transcribed gene body
chrIII	89700	89800	Transcribed gene body
chrIII	89800	89900	Transcribed gene body
chrIII	89900	90400	Transcribed gene body
chrIII	90400	90500	Transcribed gene body
chrIII	90500	90600	Transcribed gene body
chrIII	90600	91600	Transcribed gene body
chrIII	91600	91900	Transcribed gene body
chrIII	91900	92500	Transcribed gene body
chrIII	92500	92600	Transcribed gene body
chrIII	92600	92800	Transcribed gene body
chrIII	92800	92900	Transcribed gene body
chrIII	92900	93100	Transcribed gene body
chrIII	93100	93300	Transcribed gene body
chrIII	93300	93900	Transcribed gene body
chrIII	93900	94300	Transcribed gene body
chrIII	94300	94500	Transcribed gene body
chrIII	94500	94600	TSS/Promoter
chrIII	94600	95000	TSS/Promoter
chrIII	95000	95100	TSS/Promoter
chrIII	95100	95200	Active enhancer
chrIII	95200	95600	Active enhancer
chrIII	95600	96000	Active enhancer
chrIII	96000	96300	Active enhancer
chrIII	96300	96900	Repressed enhancer
chrIII	96900	97100	H3K27me3 repressed
chrIII	97100	105700	Low signal
chrIII	105700	105800	H3K27me3 repressed
chrIII	105800	107200	Low signal
chrIII	107200	107500	H3K27me3 repressed
chrIII	107500	110200	Heterochromatin
chrIII	110200	113200	Low signal
chrIII	113200	114900	Heterochromatin
chrIII	114900	115800	Heterochromatin
chrIII	115800	116000	Heterochromatin
chrIII	116000	118900	Heterochromatin
chrIII	118900	119600	Heterochromatin
chrIII	119600	119800	Heterochromatin
chrIII	119800	121100	Heterochromatin
chrIII	121100	121200	H3K27me3 repressed
chrIII	121200	121300	Low signal
chrIII	121300	121400	H3K27me3 repressed
chrIII	121400	122200	Low signal
chrIII	122200	122700	H3K27me3 repressed
chrIII	122700	123800	Low signal
chrIII	123800	124200	H3K27me3 repressed
chrIII	124200	124800	Low signal
chrIII	124800	125000	H3K27me3 repressed
chrIII	125000	126500	Heterochromatin
chrIII	126500	126800	Heterochromatin
chrIII	126800	126900	Heterochromatin
chrIII	126900	127100	Heterochromatin
chrIII	127100	128600	Heterochromatin
chrIII	128600	128700	H3K27me3 repressed
chrIII	128700	130500	Heterochromatin
chrIII	130500	130700	Heterochromatin
chrIII	130700	131400	Heterochromatin
chrIII	131400	131600	H3K27me3 repressed
chrIII	131600	131700	Active enhancer
chrIII	131700	131900	Repressed enhancer
chrIII	131900	132200	Low signal
chrIII	132200	133000	H3K27me3 repressed
chrIII	133000	134100	Low signal
chrIII	134100	134400	H3K27me3 repressed
chrIII	134400	135100	Low signal
chrIII	135100	136000	Heterochromatin
chrIII	136000	139400	Heterochromatin
chrIII	139400	139700	Heterochromatin
chrIII	139700	141800	H3K27me3 repressed
chrIII	141800	142300	Heterochromatin
chrIII	142300	142400	TSS/Promoter
chrIII	142400	144600	TSS/Promoter
chrIII	144600	145200	TSS/Promoter
chrIII	145200	145300	TSS/Promoter
chrIII	145300	145500	Active enhancer
chrIII	145500	145700	TSS/Promoter
chrIII	145700	145800	TSS/Promoter
chrIII	145800	146400	TSS/Promoter
chrIII	146400	146500	TSS/Promoter
chrIII	146500	146800	Low signal
chrIII	146800	147400	H3K27me3 repressed
chrIII	147400	148200	Heterochromatin
chrIII	148200	150200	Heterochromatin
chrIII	150200	150400	Heterochromatin
chrIII	150400	151000	Heterochromatin
chrIII	151000	151300	Heterochromatin
chrIII	151300	151700	Heterochromatin
chrIII	151700	152100	Heterochromatin
chrIII	152100	152900	Low signal
chrIII	152900	153000	H3K27me3 repressed
chrIII	153000	154100	Heterochromatin
chrIII	154100	154200	H3K27me3 repressed
chrIII	154200	154600	Heterochromatin
chrIII	154600	155500	Heterochromatin
chrIII	155500	155700	Heterochromatin
chrIII	155700	160900	Heterochromatin
chrIII	160900	161900	Heterochromatin
chrIII	161900	162400	Heterochromatin
chrIII	162400	163200	Heterochromatin
chrIII	163200	163500	Heterochromatin
chrIII	163500	163800	Heterochromatin
chrIII	163800	164800	Heterochromatin
chrIII	164800	165300	Heterochromatin
chrIII	165300	166200	Heterochromatin
chrIII	166200	168200	Heterochromatin
chrIII	168200	168600	H3K27me3 repressed
chrIII	168600	168800	Heterochromatin
chrIII	168800	170100	H3K27me3 repressed
chrIII	170100	170700	Heterochromatin
chrIII	170700	171100	H3K27me3 repressed
chrIII	171100	172300	Heterochromatin
chrIII	172300	172700	H3K27me3 repressed
chrIII	172700	173300	Low signal
chrIII	173300	173600	Active enhancer
chrIII	173600	174500	H3K27me3 repressed
chrIII	174500	174700	Heterochromatin
chrIII	174700	175600	H3K27me3 repressed
chrIII	175600	176600	Heterochromatin
chrIII	176600	176700	Heterochromatin
chrIII	176700	179000	H3K27me3 repressed
chrIII	179000	179100	Active enhancer
chrIII	179100	179400	TSS/Promoter
chrIII	179400	179900	TSS/Promoter
chrIII	179900	180000	TSS/Promoter
chrIII	180000	182500	H3K27me3 repressed
chrIII	182500	183100	Heterochromatin
chrIII	183100	183800	Heterochromatin
chrIII	183800	184300	H3K27me3 repressed
chrIII	184300	184800	Active enhancer
chrIII	184800	185000	Active enhancer
chrIII	185000	185300	Low signal
chrIII	185300	185900	Transcribed gene body
chrIII	185900	186000	Low signal
chrIII	186000	187100	Transcribed gene body
chrIII	187100	187200	Transcribed gene body
chrIII	187200	187400	Transcribed gene body
chrIII	187400	187800	Transcribed gene body
chrIII	187800	187900	Transcribed gene body
chrIII	187900	188200	TSS/Promoter
chrIII	188200	188700	TSS/Promoter
chrIII	188700	188800	TSS/Promoter
chrIII	188800	189700	TSS/Promoter
chrIII	189700	190400	Transcribed gene body
chrIII	190400	190500	Transcribed gene body
chrIII	190500	191700	Transcribed gene body
chrIII	191700	191800	TSS/Promoter
chrIII	191800	198000	Transcribed gene body
chrIII	198000	200000	Low signal
chrIII	200000	200300	Transcribed gene body
chrIII	200300	201400	Low signal
chrIII	201400	201500	Transcribed gene body
chrIII	201500	201800	Low signal
chrIII	201800	201900	Transcribed gene body
chrIII	201900	202600	Low signal
chrIII	202600	202700	Transcribed gene body
chrIII	202700	203400	Heterochromatin
chrIII	203400	204100	Low signal
chrIII	204100	204300	H3K27me3 repressed
chrIII	204300	204900	Heterochromatin
chrIII	204900	205000	Heterochromatin
chrIII	205000	205600	Heterochromatin
chrIII	205600	207000	Heterochromatin
chrIII	207000	207200	Heterochromatin
chrIII	207200	207500	Heterochromatin
chrIII	207500	208800	Heterochromatin
chrIII	208800	209200	H3K27me3 repressed
chrIII	209200	209300	Heterochromatin
chrIII	209300	209400	Heterochromatin
chrIII	209400	209700	Heterochromatin
chrIII	209700	210100	Heterochromatin
chrIII	210100	210300	Low signal
chrIII	210300	210400	Low signal
chrIII	210400	210700	Repressed enhancer
chrIII	210700	211400	Low signal
chrIII	211400	211600	H3K27me3 repressed
chrIII	211600	212100	Low signal
chrIII	212100	212400	H3K27me3 repressed
chrIII	212400	213700	Low signal
chrIII	213700	213800	H3K27me3 repressed
chrIII	213800	214400	Low signal
chrIII	214400	214900	H3K27me3 repressed
chrIII	214900	215400	Low signal
chrIII	215400	215500	H3K27me3 repressed
chrIII	215500	215800	Repressed enhancer
chrIII	215800	216200	Low signal
chrIII	216200	216800	Repressed enhancer
chrIII	216800	217400	Low signal
chrIII	217400	217700	Repressed enhancer
chrIII	217700	218700	Low signal
chrIII	218700	218800	H3K27me3 repressed
chrIII	218800	219700	Low signal
chrIII	219700	220000	Low signal
chrIII	220000	220100	Active enhancer
chrIII	220100	220600	Active enhancer
chrIII	220600	220900	Active enhancer
chrIII	220900	221600	Transcribed gene body
chrIII	221600	222600	Transcribed gene body
chrIII	222600	223200	Transcribed gene body
chrIII	223200	223600	Transcribed gene body
chrIII	223600	225000	Transcribed gene body
chrIII	225000	225100	Transcribed gene body
chrIII	225100	225900	Low signal
chrIII	225900	226400	Low signal
chrIII	226400	226500	H3K27me3 repressed
chrIII	226500	231000	Low signal
chrIII	231000	233500	Low signal
chrIII	233500	233600	Repressed enhancer
chrIII	233600	233900	Low signal
chrIII	233900	234000	Repressed enhancer
chrIII	234000	234500	Low signal
chrIII	234500	234700	Repressed enhancer
chrIII	234700	235100	Active enhancer
chrIII	235100	235400	TSS/Promoter
chrIII	235400	235600	TSS/Promoter
chrIII	235600	236600	TSS/Promoter
chrIII	236600	236800	Transcribed gene body
chrIII	236800	237200	Transcribed gene body
chrIII	237200	237300	Transcribed gene body
chrIII	237300	237600	Transcribed gene body
chrIII	237600	237800	Transcribed gene body
chrIII	237800	238000	Transcribed gene body
chrIII	238000	239100	Transcribed gene body
chrIII	239100	239200	Transcribed gene body
chrIII	239200	239500	Transcribed gene body
chrIII	239500	240300	Transcribed gene body
chrIII	240300	240800	Transcribed gene body
chrIII	240800	242700	Transcribed gene body
chrIII	242700	243100	Transcribed gene body
chrIII	243100	243600	Transcribed gene body
chrIII	243600	243800	Transcribed gene body
chrIII	243800	248000	Transcribed gene body
chrIII	248000	248200	Transcribed gene body
chrIII	248200	249100	Transcribed gene body
chrIII	249100	249200	Transcribed gene body
chrIII	249200	249300	Transcribed gene body
chrIII	249300	249400	Transcribed gene body
chrIII	249400	251500	Transcribed gene body
chrIII	251500	251700	Transcribed gene body
chrIII	251700	255600	Transcribed gene body
chrIII	255600	256100	TSS/Promoter
chrIII	256100	260000	Transcribed gene body
chrIII	260000	260300	Low signal
chrIII	260300	261800	Transcribed gene body
chrIII	261800	262900	Low signal
chrIII	262900	267200	Transcribed gene body
chrIII	267200	268400	Low signal
chrIII	268400	269700	Transcribed gene body
chrIII	269700	270300	Low signal
chrIII	270300	270800	Transcribed gene body
chrIII	270800	271000	Low signal
chrIII	271000	271200	Transcribed gene body
chrIII	271200	271700	Low signal
chrIII	271700	273100	Transcribed gene body
chrIII	273100	273900	Low signal
chrIII	273900	275800	Low signal
chrIII	275800	276600	Low signal
chrIII	276600	277900	Transcribed gene body
chrIII	277900	278600	Low signal
chrIII	278600	278700	Active enhancer
chrIII	278700	278800	Active enhancer
chrIII	278800	278900	Active enhancer
chrIII	278900	279200	Active enhancer
chrIII	279200	279400	Active enhancer
chrIII	279400	279600	Low signal
chrIII	279600	281600	Transcribed gene body
chrIII	281600	282100	Low signal
chrIII	282100	283000	Transcribed gene body
chrIII	283000	283300	Low signal
chrIII	283300	283700	Transcribed gene body
chrIII	283700	284200	Low signal
chrIII	284200	284900	Transcribed gene body
chrIII	284900	285200	Low signal
chrIII	285200	285500	Transcribed gene body
chrIII	285500	286900	Low signal
chrIII	286900	288600	Transcribed gene body
chrIII	288600	289100	Low signal
chrIII	289100	290000	Transcribed gene body
chrIII	290000	292300	Low signal
chrIII	292300	292800	Active enhancer
chrIII	292800	293500	Transcribed gene body
chrIII	293500	294000	Low signal
chrIII	294000	294100	H3K27me3 repressed
chrIII	294100	294700	Heterochromatin
chrIII	294700	296800	Heterochromatin
chrIII	296800	297200	Heterochromatin
chrIII	297200	297900	Heterochromatin
chrIII	297900	298300	Heterochromatin
chrIII	298300	298800	Heterochromatin
chrIII	298800	299400	Heterochromatin
chrIII	299400	300900	Heterochromatin
chrIII	300900	301300	Heterochromatin
chrIII	301300	301500	H3K27me3 repressed
chrIII	301500	302600	Low signal
chrIII	302600	303200	Heterochromatin
chrIII	303200	303400	Heterochromatin
chrIII	303400	303600	Heterochromatin
chrIII	303600	304400	Low signal
chrIII	304400	304700	Active enhancer
chrIII	304700	304800	Active enhancer
chrIII	304800	305000	TSS/Promoter
chrIII	305000	305100	TSS/Promoter
chrIII	305100	305300	Active enhancer
chrIII	305300	305500	Active enhancer
chrIII	305500	305600	Transcribed gene body
chrIII	305600	305800	Transcribed gene body
chrIII	305800	306700	Transcribed gene body
chrIII	306700	307000	Transcribed gene body
chrIII	307000	307200	Transcribed gene body
chrIII	307200	307500	Transcribed gene body
chrIII	307500	309600	Transcribed gene body
chrIII	309600	309800	TSS/Promoter
chrIII	309800	310000	Transcribed gene body
chrIII	310000	310900	Low signal
chrIII	310900	311200	Active enhancer
chrIII	311200	311600	Active enhancer
chrIII	311600	311700	Active enhancer
chrIII	311700	312800	Low signal
chrIII	312800	313000	Transcribed gene body
chrIII	313000	314100	Transcribed gene body
chrIII	314100	317500	Low signal
chrIII	317500	317600	Transcribed gene body
chrIII	317600	321400	Low signal
chrIII	321400	321700	Transcribed gene body
chrIII	321700	324400	Low signal
chrIII	324400	332700	Low signal
chrIII	332700	333000	Low signal
chrIII	333000	334800	Transcribed gene body
chrIII	334800	335000	Transcribed gene body
chrIII	335000	337200	Transcribed gene body
chrIII	337200	337500	Low signal
chrIII	337500	337700	Transcribed gene body
chrIII	337700	338000	Transcribed gene body
chrIII	338000	338300	Transcribed gene body
chrIII	338300	338500	Transcribed gene body
chrIII	338500	340300	Transcribed gene body
chrIII	340300	340600	Transcribed gene body
chrIII	340600	340900	Transcribed gene body
chrIII	340900	341200	Low signal
chrIII	341200	341400	Transcribed gene body
chrIII	341400	341800	Transcribed gene body
chrIII	341800	342400	Transcribed gene body
chrIII	342400	342500	Transcribed gene body
chrIII	342500	342600	Transcribed gene body
chrIII	342600	343100	Transcribed gene body
chrIII	343100	343200	TSS/Promoter
chrIII	343200	343400	Active enhancer
chrIII	343400	343700	TSS/Promoter
chrIII	343700	344000	TSS/Promoter
chrIII	344000	344900	TSS/Promoter
chrIII	344900	345100	TSS/Promoter
chrIII	345100	345300	Transcribed gene body
chrIII	345300	345800	TSS/Promoter
chrIII	345800	346100	Transcribed gene body
chrIII	346100	346500	TSS/Promoter
chrIII	346500	346800	Transcribed gene body
chrIII	346800	349300	TSS/Promoter
chrIII	349300	349800	TSS/Promoter
chrIII	349800	350100	Active enhancer
chrIII	350100	350600	Active enhancer
chrIII	350600	351100	H3K27me3 repressed
chrIII	351100	351400	Heterochromatin
chrIII	351400	353800	H3K27me3 repressed
chrIII	353800	354700	Active enhancer
chrIII	354700	355200	Active enhancer
chrIII	355200	356000	TSS/Promoter
chrIII	356000	356200	Active enhancer
chrIII	356200	357100	TSS/Promoter
chrIII	357100	357400	Active enhancer
chrIII	357400	357900	Active enhancer
chrIII	357900	358400	Low signal
chrIII	358400	358500	Repressed enhancer
chrIII	358500	360100	Low signal
chrIII	360100	360600	H3K27me3 repressed
chrIII	360600	363200	Low signal
chrIII	363200	363400	H3K27me3 repressed
chrIII	363400	366500	Low signal
chrIII	366500	366600	H3K27me3 repressed
chrIII	366600	366700	Low signal
chrIII	366700	366800	H3K27me3 repressed
chrIII	366800	367200	Low signal
chrIII	367200	367400	H3K27me3 repressed
chrIII	367400	367600	Low signal
chrIII	367600	367700	H3K27me3 repressed
chrIII	367700	368500	Heterochromatin
chrIII	368500	371200	Heterochromatin
chrIII	371200	371900	Heterochromatin
chrIII	371900	373300	Heterochromatin
chrIII	373300	373400	Heterochromatin
chrIII	373400	374000	Heterochromatin
chrIII	374000	374200	Heterochromatin
chrIII	374200	375200	Low signal
chrIII	375200	375300	H3K27me3 repressed
chrIII	375300	376100	Low signal
chrIII	376100	376500	H3K27me3 repressed
chrIII	376500	377000	Low signal
chrIII	377000	377200	Repressed enhancer
chrIII	377200	377500	Low signal
chrIII	377500	377600	Active enhancer
chrIII	377600	377900	Active enhancer
chrIII	377900	378300	Low signal
chrIII	378300	378500	Repressed enhancer
chrIII	378500	379400	Low signal
chrIII	379400	379500	Low signal
chrIII	379500	379600	H3K27me3 repressed
chrIII	379600	379700	Heterochromatin
chrIII	379700	379800	Low signal
chrIII	379800	380400	Low signal
chrIII	380400	380900	Low signal
chrIII	380900	381200	Repressed enhancer
chrIII	381200	381800	Low signal
chrIII	381800	381900	H3K27me3 repressed
chrIII	381900	382200	Low signal
chrIII	382200	382300	Repressed enhancer
chrIII	382300	382600	Heterochromatin
chrIII	382600	382700	H3K27me3 repressed
chrIII	382700	383400	Heterochromatin
chrIII	383400	383700	Heterochromatin
chrIII	383700	384700	Heterochromatin
chrIII	384700	385900	Heterochromatin
chrIII	385900	386500	Heterochromatin
chrIII	386500	388300	Heterochromatin
chrIII	388300	388400	Heterochromatin
chrIII	388400	390800	Low signal
chrIII	390800	392000	Heterochromatin
chrIII	392000	392300	Heterochromatin
chrIII	392300	393000	Heterochromatin
chrIII	393000	393400	Heterochromatin
chrIII	393400	396400	Low signal
chrIII	396400	396600	Heterochromatin
chrIII	396600	397700	Heterochromatin
chrIII	397700	399600	Heterochromatin
chrIII	399600	400100	H3K27me3 repressed
chrIII	400100	402100	Heterochromatin
chrIII	402100	402600	H3K27me3 repressed
chrIII	402600	402900	Heterochromatin
chrIII	402900	403500	Heterochromatin
chrIII	403500	404400	Heterochromatin
chrIII	404400	406900	Heterochromatin
chrIII	406900	407600	Low signal
chrIII	407600	407700	Repressed enhancer
chrIII	407700	408300	Low signal
chrIII	408300	409100	Transcribed gene body
chrIII	409100	409800	Low signal
chrIII	409800	413000	Transcribed gene body
chrIII	413000	413900	Low signal
chrIII	413900	414100	Transcribed gene body
chrIII	414100	415300	Low signal
chrIII	415300	415500	Transcribed gene body
chrIII	415500	415600	H3K27me3 repressed
chrIII	415600	416900	Low signal
chrIII	416900	421200	Transcribed gene body
chrIII	421200	421500	Low signal
chrIII	421500	423400	Transcribed gene body
chrIII	423400	423700	TSS/Promoter
chrIII	423700	424400	TSS/Promoter
chrIII	424400	424500	Active enhancer
chrIII	424500	424700	Low signal
chrIII	424700	427500	Low signal
chrIII	427500	427800	H3K27me3 repressed
chrIII	427800	428000	Low signal
chrIII	428000	428200	Active enhancer
chrIII	428200	428400	Active enhancer
chrIII	428400	428700	TSS/Promoter
chrIII	428700	429900	TSS/Promoter
chrIII	429900	430000	TSS/Promoter
chrIII	430000	430500	Transcribed gene body
chrIII	430500	430600	Transcribed gene body
chrIII	430600	431000	Transcribed gene body
chrIII	431000	431300	Transcribed gene body
chrIII	431300	431600	Transcribed gene body
chrIII	431600	432300	Low signal
chrIII	432300	432400	Repressed enhancer
chrIII	432400	432500	Low signal
chrIII	432500	432600	Repressed enhancer
chrIII	432600	432700	Low signal
chrIII	432700	433200	Active enhancer
chrIII	433200	433600	TSS/Promoter
chrIII	433600	434700	Active enhancer
chrIII	434700	435000	TSS/Promoter
chrIII	435000	435200	TSS/Promoter
chrIII	435200	436400	Transcribed gene body
chrIII	436400	436700	Transcribed gene body
chrIII	436700	437800	Transcribed gene body
chrIII	437800	438800	Transcribed gene body
chrIII	438800	439000	Transcribed gene body
chrIII	439000	439100	H3K27me3 repressed
chrIII	439100	439600	Low signal
chrIII	439600	440100	H3K27me3 repressed
chrIII	440100	440600	Low signal
chrIII	440600	440800	H3K27me3 repressed
chrIII	440800	442100	Heterochromatin
chrIII	442100	442600	H3K27me3 repressed
chrIII	442600	443200	Low signal
chrIII	443200	443400	H3K27me3 repressed
chrIII	443400	444000	Low signal
chrIII	444000	444400	H3K27me3 repressed
chrIII	444400	444500	Low signal
chrIII	444500	444700	Heterochromatin
chrIII	444700	444800	Heterochromatin
chrIII	444800	444900	H3K27me3 repressed
chrIII	444900	445300	Low signal
chrIII	445300	445600	Repressed enhancer
chrIII	445600	445900	Low signal
chrIII	445900	446200	H3K27me3 repressed
chrIII	446200	446900	Low signal
chrIII	446900	447100	H3K27me3 repressed
chrIII	447100	447200	Heterochromatin
chrIII	447200	447800	Heterochromatin
chrIII	447800	448400	Low signal
chrIII	448400	448500	H3K27me3 repressed
chrIII	448500	449000	Low signal
chrIII	449000	449200	H3K27me3 repressed
chrIII	449200	452000	Low signal
chrIII	452000	452100	H3K27me3 repressed
chrIII	452100	452300	Heterochromatin
chrIII	452300	454300	Low signal
chrIII	454300	454700	H3K27me3 repressed
chrIII	454700	455400	Low signal
chrIII	455400	455700	Heterochromatin
chrIII	455700	455800	H3K27me3 repressed
chrIII	455800	456500	Heterochromatin
chrIII	456500	457100	Heterochromatin
chrIII	457100	457700	Heterochromatin
chrIII	457700	459600	Heterochromatin
chrIII	459600	460200	Heterochromatin
chrIII	460200	460400	Heterochromatin
chrIII	460400	460700	Heterochromatin
chrIII	460700	460800	Heterochromatin
chrIII	460800	462600	Low signal
chrIII	462600	463000	Low signal
chrIII	463000	464300	Transcribed gene body
chrIII	464300	464900	Low signal
chrIII	464900	467300	Transcribed gene body
chrIII	467300	467800	Low signal
chrIII	467800	468000	Transcribed gene body
chrIII	468000	468100	Transcribed gene body
chrIII	468100	470200	Transcribed gene body
chrIII	470200	470400	Transcribed gene body
chrIII	470400	471100	Transcribed gene body
chrIII	471100	471800	TSS/Promoter
chrIII	471800	472100	TSS/Promoter
chrIII	472100	472200	TSS/Promoter
chrIII	472200	472900	TSS/Promoter
chrIII	472900	474100	Transcribed gene body
chrIII	474100	474500	Transcribed gene body
chrIII	474500	474900	Transcribed gene body
chrIII	474900	475000	Transcribed gene body
chrIII	475000	476000	Transcribed gene body
chrIII	476000	476300	Transcribed gene body
chrIII	476300	476600	Transcribed gene body
chrIII	476600	477000	Transcribed gene body
chrIII	477000	478300	Transcribed gene body
chrIII	478300	478500	Transcribed gene body
chrIII	478500	480800	Transcribed gene body
chrIII	480800	481100	Low signal
chrIII	481100	482800	Transcribed gene body
chrIII	482800	483000	Active enhancer
chrIII	483000	483300	Active enhancer
chrIII	483300	483700	Low signal
chrIII	483700	485000	Active enhancer
chrIII	485000	485100	Active enhancer
chrIII	485100	485200	Active enhancer
chrIII	485200	485400	Repressed enhancer
chrIII	485400	485500	H3K27me3 repressed
chrIII	485500	486200	Heterochromatin
chrIII	486200	486400	H3K27me3 repressed
chrIII	486400	486500	Heterochromatin
chrIII	486500	486600	H3K27me3 repressed
chrIII	486600	487700	Heterochromatin
chrIII	487700	488800	Low signal
chrIII	488800	489100	H3K27me3 repressed
chrIII	489100	489900	Low signal
chrIII	489900	490100	Repressed enhancer
chrIII	490100	490900	Low signal
chrIII	490900	491200	Active enhancer
chrIII	491200	491500	TSS/Promoter
chrIII	491500	491800	TSS/Promoter
chrIII	491800	492400	Transcribed gene body
chrIII	492400	493500	Low signal
chrIII	493500	495700	Transcribed gene body
chrIII	495700	496200	Low signal
chrIII	496200	498500	Transcribed gene body
chrIII	498500	499100	Low signal
chrIII	499100	502100	Transcribed gene body
chrIII	502100	502400	Low signal
chrIII	502400	502500	Transcribed gene body
chrIII	502500	502700	Low signal
chrIII	502700	503100	H3K27me3 repressed
chrIII	503100	504200	Low signal
chrIII	504200	504300	H3K27me3 repressed
chrIII	504300	504400	Heterochromatin
chrIII	504400	504500	H3K27me3 repressed
chrIII	504500	504600	Heterochromatin
chrIII	504600	505000	H3K27me3 repressed
chrIII	505000	505600	Heterochromatin
chrIII	505600	511400	Heterochromatin
chrIII	511400	512000	Heterochromatin
chrIII	512000	514000	Heterochromatin
chrIII	514000	514300	Heterochromatin
chrIII	514300	515300	Heterochromatin
chrIII	515300	516300	H3K27me3 repressed
chrIII	516300	516500	Heterochromatin
chrIII	516500	516600	Heterochromatin
chrIII	516600	517400	Heterochromatin
chrIII	517400	518800	Heterochromatin
chrIII	518800	519200	Heterochromatin
chrIII	519200	523500	Heterochromatin
chrIII	523500	523600	Heterochromatin
chrIII	523600	523700	H3K27me3 repressed
chrIII	523700	523800	Heterochromatin
chrIII	523800	524600	H3K27me3 repressed
chrIII	524600	524900	Heterochromatin
chrIII	524900	525000	H3K27me3 repressed
chrIII	525000	525400	Heterochromatin
chrIII	525400	525700	H3K27me3 repressed
chrIII	525700	526800	Heterochromatin
chrIII	526800	527600	Heterochromatin
chrIII	527600	527900	Heterochromatin
chrIII	527900	528000	Heterochromatin
chrIII	528000	528100	Heterochromatin
chrIII	528100	528200	H3K27me3 repressed
chrIII	528200	529100	Heterochromatin
chrIII	529100	529300	H3K27me3 repressed
chrIII	529300	529500	Repressed enhancer
chrIII	529500	529600	Active enhancer
chrIII	529600	529700	Active enhancer
chrIII	529700	529800	H3K27me3 repressed
chrIII	529800	531000	Heterochromatin
chrIII	531000	532300	Heterochromatin
chrIII	532300	532400	Heterochromatin
chrIII	532400	533100	Heterochromatin
chrIII	533100	533200	Heterochromatin
chrIII	533200	533600	Low signal
chrIII	533600	534000	H3K27me3 repressed
chrIII	534000	534500	Low signal
chrIII	534500	535000	Repressed enhancer
chrIII	535000	535100	Active enhancer
chrIII	535100	535500	Active enhancer
chrIII	535500	536200	Active enhancer
chrIII	536200	536500	Repressed enhancer
chrIII	536500	537000	Low signal
chrIII	537000	537200	H3K27me3 repressed
chrIII	537200	541100	Low signal
chrIII	541100	541200	H3K27me3 repressed
chrIII	541200	542900	Low signal
chrIII	542900	543000	H3K27me3 repressed
chrIII	543000	543800	Low signal
chrIII	543800	543900	Repressed enhancer
chrIII	543900	544900	Low signal
chrIII	544900	545000	Repressed enhancer
chrIII	545000	545800	Low signal
chrIII	545800	546200	H3K27me3 repressed
chrIII	546200	548200	Low signal
chrIII	548200	548900	Repressed enhancer
chrIII	548900	549400	Low signal
chrIII	549400	550000	Repressed enhancer
chrIII	550000	550300	Low signal
chrIII	550300	551000	Repressed enhancer
chrIII	551000	552500	Low signal
chrIII	552500	552800	Repressed enhancer
chrIII	552800	553300	Low signal
chrIII	553300	553700	Repressed enhancer
chrIII	553700	553900	Low signal
chrIII	553900	554800	Low signal
chrIII	554800	554900	H3K27me3 repressed
chrIII	554900	555000	Repressed enhancer
chrIII	555000	555900	Low signal
chrIII	555900	556400	Low signal
chrIII	556400	557300	Repressed enhancer
chrIII	557300	557900	Low signal
chrIII	557900	558100	Repressed enhancer
chrIII	558100	558800	Active enhancer
chrIII	558800	559300	Active enhancer
chrIII	559300	559400	Active enhancer
chrIII	559400	560200	Active enhancer
chrIII	560200	560300	Active enhancer
chrIII	560300	560800	Active enhancer
chrIII	560800	561100	Transcribed gene body
chrIII	561100	561600	Transcribed gene body
chrIII	561600	561800	Transcribed gene body
chrIII	561800	562100	Transcribed gene body
chrIII	562100	562200	Transcribed gene body
chrIII	562200	563100	Low signal
chrIII	563100	563400	Repressed enhancer
chrIII	563400	564800	Low signal
chrIII	564800	565100	Repressed enhancer
chrIII	565100	565600	Low signal
chrIII	565600	565700	Transcribed gene body
chrIII	565700	567900	Low signal
chrIII	567900	568000	Repressed enhancer
chrIII	568000	569500	Low signal
chrIII	569500	569800	Repressed enhancer
chrIII	569800	576100	Low signal
chrIII	576100	578400	Transcribed gene body
chrIII	578400	579100	Low signal
chrIII	579100	579900	Transcribed gene body
chrIII	579900	580400	Low signal
chrIII	580400	580600	Active enhancer
chrIII	580600	581000	Active enhancer
chrIII	581000	581500	Low signal
chrIII	581500	583100	Transcribed gene body
chrIII	583100	583800	Low signal
chrIII	583800	588200	Transcribed gene body
chrIII	588200	588400	Transcribed gene body
chrIII	588400	590900	Low signal
chrIII	590900	591300	Transcribed gene body
chrIII	591300	591600	Transcribed gene body
chrIII	591600	592000	Transcribed gene body
chrIII	592000	592100	Transcribed gene body
chrIII	592100	592200	Transcribed gene body
chrIII	592200	593200	Low signal
chrIII	593200	593400	Active enhancer
chrIII	593400	593600	Active enhancer
chrIII	593600	593900	Active enhancer
chrIII	593900	594300	Active enhancer
chrIII	594300	594400	Active enhancer
chrIII	594400	594600	Low signal
chrIII	594600	595000	Transcribed gene body
chrIII	595000	595900	Transcribed gene body
chrIII	595900	596600	Transcribed gene body
chrIII	596600	597300	Transcribed gene body
chrIII	597300	597700	TSS/Promoter
chrIII	597700	598400	TSS/Promoter
chrIII	598400	598700	TSS/Promoter
chrIII	598700	599000	Active enhancer
chrIII	599000	599100	Active enhancer
chrIII	599100	599200	Low signal
chrIII	599200	599800	Low signal
chrIII	599800	600400	H3K27me3 repressed
chrIII	600400	603100	Low signal
chrIII	603100	603300	H3K27me3 repressed
chrIII	603300	603800	Low signal
chrIII	603800	603900	H3K27me3 repressed
chrIII	603900	604500	Low signal
chrIII	604500	604800	H3K27me3 repressed
chrIII	604800	605600	Low signal
chrIII	605600	605700	H3K27me3 repressed
chrIII	605700	606100	Low signal
chrIII	606100	606300	H3K27me3 repressed
chrIII	606300	606400	H3K27me3 repressed
chrIII	606400	607000	Heterochromatin
chrIII	607000	607700	Heterochromatin
chrIII	607700	607900	H3K27me3 repressed
chrIII	607900	608100	Low signal
chrIII	608100	608500	Repressed enhancer
chrIII	608500	608600	Low signal
chrIII	608600	608700	Active enhancer
chrIII	608700	608800	Active enhancer
chrIII	608800	609000	Repressed enhancer
chrIII	609000	609400	H3K27me3 repressed
chrIII	609400	609500	H3K27me3 repressed
chrIII	609500	611400	Low signal
chrIII	611400	611500	H3K27me3 repressed
chrIII	611500	612700	Low signal
chrIII	612700	612800	H3K27me3 repressed
chrIII	612800	613100	Low signal
chrIII	613100	613400	Repressed enhancer
chrIII	613400	613900	Low signal
chrIII	613900	614200	H3K27me3 repressed
chrIII	614200	614500	Low signal
chrIII	614500	615300	H3K27me3 repressed
chrIII	615300	615800	Low signal
chrIII	615800	616100	H3K27me3 repressed
chrIII	616100	618800	Low signal
chrIII	618800	619100	H3K27me3 repressed
chrIII	619100	619600	Low signal
chrIII	619600	621400	Low signal
chrIII	621400	621500	Repressed enhancer
chrIII	621500	621700	Transcribed gene body
chrIII	621700	623500	Transcribed gene body
chrIII	623500	623700	TSS/Promoter
chrIII	623700	623900	TSS/Promoter
chrIII	623900	624000	Active enhancer
chrIII	624000	624200	Active enhancer
chrIII	624200	624600	Active enhancer
chrIII	624600	624700	Low signal
chrIII	624700	624800	Repressed enhancer
chrIII	624800	625000	Transcribed gene body
chrIII	625000	625100	H3K27me3 repressed
chrIII	625100	625200	Transcribed gene body
chrIII	625200	625700	Transcribed gene body
chrIII	625700	625900	Transcribed gene body
chrIII	625900	626000	Low signal
chrIII	626000	626200	Low signal
chrIII	626200	627000	H3K27me3 repressed
chrIII	627000	627500	Low signal
chrIII	627500	627700	TSS/Promoter
chrIII	627700	627800	Active enhancer
chrIII	627800	627900	Low signal
chrIII	627900	628400	Repressed enhancer
chrIII	628400	629200	Low signal
chrIII	629200	629300	Repressed enhancer
chrIII	629300	632000	Low signal
chrIII	632000	633000	Transcribed gene body
chrIII	633000	633600	Transcribed gene body
chrIII	633600	634100	Transcribed gene body
chrIII	634100	634300	Transcribed gene body
chrIII	634300	634500	TSS/Promoter
chrIII	634500	635000	TSS/Promoter
chrIII	635000	635300	TSS/Promoter
chrIII	635300	639700	Transcribed gene body
chrIII	639700	640300	TSS/Promoter
chrIII	640300	640800	TSS/Promoter
chrIII	640800	641300	TSS/Promoter
chrIII	641300	641500	Transcribed gene body
chrIII	641500	642100	Transcribed gene body
chrIII	642100	642200	Transcribed gene body
chrIII	642200	642300	Transcribed gene body
chrIII	642300	642400	Transcribed gene body
chrIII	642400	643400	Transcribed gene body
chrIII	643400	643800	Transcribed gene body
chrIII	643800	644400	Transcribed gene body
chrIII	644400	644800	Transcribed gene body
chrIII	644800	646000	Transcribed gene body
chrIII	646000	646200	TSS/Promoter
chrIII	646200	646700	Transcribed gene body
chrIII	646700	647000	TSS/Promoter
chrIII	647000	647200	Active enhancer
chrIII	647200	647400	Active enhancer
chrIII	647400	647600	Active enhancer
chrIII	647600	648100	TSS/Promoter
chrIII	648100	648200	Transcribed gene body
chrIII	648200	648500	Transcribed gene body
chrIII	648500	649100	Transcribed gene body
chrIII	649100	649300	Transcribed gene body
chrIII	649300	649400	Transcribed gene body
chrIII	649400	649500	Transcribed gene body
chrIII	649500	650000	Heterochromatin
chrIII	650000	650100	Heterochromatin
chrIII	650100	650200	H3K27me3 repressed
chrIII	650200	650600	Heterochromatin
chrIII	650600	650700	Heterochromatin
chrIII	650700	651700	Heterochromatin
chrIII	651700	651900	H3K27me3 repressed
chrIII	651900	652800	Heterochromatin
chrIII	652800	653800	Heterochromatin
chrIII	653800	654200	Heterochromatin
chrIII	654200	654800	Repressed enhancer
chrIII	654800	655900	Low signal
chrIII	655900	656000	H3K27me3 repressed
chrIII	656000	656400	Low signal
chrIII	656400	656600	H3K27me3 repressed
chrIII	656600	657200	Low signal
chrIII	657200	657500	H3K27me3 repressed
chrIII	657500	659000	Heterochromatin
chrIII	659000	659300	Heterochromatin
chrIII	659300	660700	Heterochromatin
chrIII	660700	660900	Low signal
chrIII	660900	661400	H3K27me3 repressed
chrIII	661400	661800	Low signal
chrIII	661800	662000	H3K27me3 repressed
chrIII	662000	662800	Low signal
chrIII	662800	663300	H3K27me3 repressed
chrIII	663300	664100	Low signal
chrIII	664100	664700	H3K27me3 repressed
chrIII	664700	665000	Low signal
chrIII	665000	665100	H3K27me3 repressed
chrIII	665100	665200	Low signal
chrIII	665200	665800	H3K27me3 repressed
chrIII	665800	666400	Low signal
chrIII	666400	666600	Repressed enhancer
chrIII	666600	667100	Low signal
chrIII	667100	667200	Repressed enhancer
chrIII	667200	667400	Low signal
chrIII	667400	667600	H3K27me3 repressed
chrIII	667600	668100	Low signal
chrIII	668100	668600	H3K27me3 repressed
chrIII	668600	669400	Low signal
chrIII	669400	669600	H3K27me3 repressed
chrIII	669600	670200	Low signal
chrIII	670200	670400	H3K27me3 repressed
chrIII	670400	671300	Low signal
chrIII	671300	671400	H3K27me3 repressed
chrIII	671400	671500	Low signal
chrIII	671500	671600	H3K27me3 repressed
chrIII	671600	673600	Low signal
chrIII	673600	673700	H3K27me3 repressed
chrIII	673700	675300	Low signal
chrIII	675300	675600	H3K27me3 repressed
chrIII	675600	676100	Low signal
chrIII	676100	676200	H3K27me3 repressed
chrIII	676200	676400	Low signal
chrIII	676400	676700	Heterochromatin
chrIII	676700	677000	Heterochromatin
chrIII	677000	678000	Heterochromatin
chrIII	678000	678300	Heterochromatin
chrIII	678300	678700	Heterochromatin
chrIII	678700	679200	Heterochromatin
chrIII	679200	680800	Low signal
chrIII	680800	681100	H3K27me3 repressed
chrIII	681100	681500	Low signal
chrIII	681500	681800	H3K27me3 repressed
chrIII	681800	682300	Low signal
chrIII	682300	682400	H3K27me3 repressed
chrIII	682400	682500	Low signal
chrIII	682500	682600	H3K27me3 repressed
chrIII	682600	682700	Low signal
chrIII	682700	682800	H3K27me3 repressed
chrIII	682800	683900	Low signal
chrIII	683900	684000	H3K27me3 repressed
chrIII	684000	685400	Low signal
chrIII	685400	685500	H3K27me3 repressed
chrIII	685500	687000	Low signal
chrIII	687000	687100	H3K27me3 repressed
chrIII	687100	687300	Low signal
chrIII	687300	687400	H3K27me3 repressed
chrIII	687400	687800	Low signal
chrIII	687800	688000	H3K27me3 repressed
chrIII	688000	688200	Heterochromatin
chrIII	688200	688300	Low signal
chrIII	688300	688600	Repressed enhancer
chrIII	688600	688700	H3K27me3 repressed
chrIII	688700	689700	Heterochromatin
chrIII	689700	690800	Heterochromatin
chrIII	690800	691100	Heterochromatin
chrIII	691100	695800	Heterochromatin
chrIII	695800	698200	Heterochromatin
chrIII	698200	698800	Heterochromatin
chrIII	698800	699500	Heterochromatin
chrIII	699500	699800	Heterochromatin
chrIII	699800	701600	Heterochromatin
chrIII	701600	704700	Low signal
chrIII	704700	704800	H3K27me3 repressed
chrIII	704800	705000	Low signal
chrIII	705000	705300	Heterochromatin
chrIII	705300	705800	H3K27me3 repressed
chrIII	705800	706100	Low signal
chrIII	706100	706300	H3K27me3 repressed
chrIII	706300	706500	Low signal
chrIII	706500	706600	H3K27me3 repressed
chrIII	706600	706800	Low signal
chrIII	706800	706900	H3K27me3 repressed
chrIII	706900	708000	Low signal
chrIII	708000	708200	H3K27me3 repressed
chrIII	708200	708900	Low signal
chrIII	708900	709200	H3K27me3 repressed
chrIII	709200	709600	Low signal
chrIII	709600	709700	Repressed enhancer
chrIII	709700	710000	Low signal
chrIII	710000	710600	H3K27me3 repressed
chrIII	710600	711000	Heterochromatin
chrIII	711000	711200	H3K27me3 repressed
chrIII	711200	712200	Heterochromatin
chrIII	712200	712500	Heterochromatin
chrIII	712500	712600	Heterochromatin
chrIII	712600	712800	H3K27me3 repressed
chrIII	712800	713000	Low signal
chrIII	713000	713300	H3K27me3 repressed
chrIII	713300	714300	Low signal
chrIII	714300	714700	H3K27me3 repressed
chrIII	714700	718800	Low signal
chrIII	718800	719000	H3K27me3 repressed
chrIII	719000	719500	Low signal
chrIII	719500	719700	H3K27me3 repressed
chrIII	719700	722400	Low signal
chrIII	722400	722800	H3K27me3 repressed
chrIII	722800	724200	Low signal
chrIII	724200	724300	H3K27me3 repressed
chrIII	724300	725000	Low signal
chrIII	725000	725400	H3K27me3 repressed
chrIII	725400	727000	Low signal
chrIII	727000	727100	Repressed enhancer
chrIII	727100	727600	Heterochromatin
chrIII	727600	730800	Heterochromatin
chrIII	730800	731500	Heterochromatin
chrIII	731500	736700	Heterochromatin
chrIII	736700	737000	H3K27me3 repressed
chrIII	737000	737100	Heterochromatin
chrIII	737100	737400	Heterochromatin
chrIII	737400	742300	Heterochromatin
chrIII	742300	742400	Heterochromatin
chrIII	742400	743400	Heterochromatin
chrIII	743400	744800	Low signal
chrIII	744800	745100	H3K27me3 repressed
chrIII	745100	745700	Low signal
chrIII	745700	745800	H3K27me3 repressed
chrIII	745800	746800	Low signal
chrIII	746800	747100	H3K27me3 repressed
chrIII	747100	747900	Low signal
chrIII	747900	748400	H3K27me3 repressed
chrIII	748400	748700	Low signal
chrIII	748700	749200	H3K27me3 repressed
chrIII	749200	750100	Low signal
chrIII	750100	750300	Repressed enhancer
chrIII	750300	752400	Low signal
chrIII	752400	753000	Repressed enhancer
chrIII	753000	753500	Low signal
chrIII	753500	753600	Repressed enhancer
chrIII	753600	754400	Low signal
chrIII	754400	754700	Active enhancer
chrIII	754700	754900	Repressed enhancer
chrIII	754900	755300	TSS/Promoter
chrIII	755300	755800	Low signal
chrIII	755800	756000	H3K27me3 repressed
chrIII	756000	756100	Heterochromatin
chrIII	756100	756400	Heterochromatin
chrIII	756400	756700	Heterochromatin
chrIII	756700	757600	Heterochromatin
chrIII	757600	757800	Heterochromatin
chrIII	757800	758300	Heterochromatin
chrIII	758300	758500	Heterochromatin
chrIII	758500	759300	Heterochromatin
chrIII	759300	760200	Heterochromatin
chrIII	760200	761400	Heterochromatin
chrIII	761400	762300	Heterochromatin
chrIII	762300	763100	Heterochromatin
chrIII	763100	763300	H3K27me3 repressed
chrIII	763300	763700	Low signal
chrIII	763700	763800	Repressed enhancer
chrIII	763800	764100	Low signal
chrIII	764100	764200	Repressed enhancer
chrIII	764200	764700	H3K27me3 repressed
chrIII	764700	765200	Heterochromatin
chrIII	765200	765500	Heterochromatin
chrIII	765500	766200	Heterochromatin
chrIII	766200	767300	Heterochromatin
chrIII	767300	767400	Heterochromatin
chrIII	767400	767500	H3K27me3 repressed
chrIII	767500	767800	Heterochromatin
chrIII	767800	768000	Low signal
chrIII	768000	768500	Repressed enhancer
chrIII	768500	769400	H3K27me3 repressed
chrIII	769400	769500	Heterochromatin
chrIII	769500	769700	Heterochromatin
chrIII	769700	769900	Heterochromatin
chrIII	769900	771200	Heterochromatin
chrIII	771200	771500	Heterochromatin
chrIII	771500	772200	Heterochromatin
chrIII	772200	772400	Heterochromatin
chrIII	772400	772800	H3K27me3 repressed
chrIII	772800	772900	Repressed enhancer
chrIII	772900	773400	TSS/Promoter
chrIII	773400	774000	H3K27me3 repressed
chrIII	774000	775200	Heterochromatin
chrIII	775200	779700	Transcribed gene body
chrIII	779700	779800	Transcribed gene body
chrIII	779800	779900	Transcribed gene body
chrIII	779900	780700	Transcribed gene body
chrIII	780700	780900	Transcribed gene body
chrIII	780900	782300	Transcribed gene body
chrIII	782300	782600	Transcribed gene body
chrIII	782600	782700	Transcribed gene body
chrIII	782700	782800	Transcribed gene body
chrIII	782800	783300	TSS/Promoter
chrIII	783300	783700	TSS/Promoter
chrIII	783700	784300	TSS/Promoter
chrIII	784300	785700	Transcribed gene body
chrIII	785700	786200	Transcribed gene body
chrIII	786200	786700	Low signal
chrIII	786700	786800	Repressed enhancer
chrIII	786800	787300	Low signal
chrIII	787300	787500	Repressed enhancer
chrIII	787500	787900	Low signal
chrIII	787900	788300	Repressed enhancer
chrIII	788300	788500	Low signal
chrIII	788500	788700	H3K27me3 repressed
chrIII	788700	789300	Heterochromatin
chrIII	789300	789400	H3K27me3 repressed
chrIII	789400	789600	Heterochromatin
chrIII	789600	790200	H3K27me3 repressed
chrIII	790200	791500	Heterochromatin
chrIII	791500	791600	H3K27me3 repressed
chrIII	791600	792000	Repressed enhancer
chrIII	792000	792800	Low signal
chrIII	792800	792900	Transcribed gene body
chrIII	792900	793500	TSS/Promoter
chrIII	793500	793800	TSS/Promoter
chrIII	793800	794200	TSS/Promoter
chrIII	794200	795100	TSS/Promoter
chrIII	795100	795900	Transcribed gene body
chrIII	795900	796300	Transcribed gene body
chrIII	796300	796600	Transcribed gene body
chrIII	796600	797200	Transcribed gene body
chrIII	797200	797300	Transcribed gene body
chrIII	797300	797400	Transcribed gene body
chrIII	797400	797800	Transcribed gene body
chrIII	797800	798000	Transcribed gene body
chrIII	798000	798500	Transcribed gene body
chrIII	798500	798600	Transcribed gene body
chrIII	798600	799600	Transcribed gene body
chrIII	799600	799700	Transcribed gene body
chrIII	799700	802000	Transcribed gene body
chrIII	802000	802200	Transcribed gene body
chrIII	802200	802400	Transcribed gene body
chrIII	802400	802900	Low signal
chrIII	802900	803400	H3K27me3 repressed
chrIII	803400	803700	Heterochromatin
chrIII	803700	803800	H3K27me3 repressed
chrIII	803800	806400	Heterochromatin
chrIII	806400	806500	H3K27me3 repressed
chrIII	806500	806700	Heterochromatin
chrIII	806700	807300	Low signal
chrIII	807300	807400	Repressed enhancer
chrIII	807400	807600	Low signal
chrIII	807600	807800	Heterochromatin
chrIII	807800	808100	H3K27me3 repressed
chrIII	808100	809400	Heterochromatin
chrIII	809400	809700	H3K27me3 repressed
chrIII	809700	811200	Heterochromatin
chrIII	811200	813600	Heterochromatin
chrIII	813600	815000	Heterochromatin
chrIII	815000	815100	H3K27me3 repressed
chrIII	815100	815900	Low signal
chrIII	815900	816000	Low signal
chrIII	816000	816300	Repressed enhancer
chrIII	816300	816800	Low signal
chrIII	816800	816900	H3K27me3 repressed
chrIII	816900	817300	Low signal
chrIII	817300	817400	H3K27me3 repressed
chrIII	817400	818200	Low signal
chrIII	818200	818400	Heterochromatin
chrIII	818400	818600	H3K27me3 repressed
chrIII	818600	819100	Heterochromatin
chrIII	819100	819600	Heterochromatin
chrIII	819600	820100	Heterochromatin
chrIII	820100	820200	Heterochromatin
chrIII	820200	820700	Heterochromatin
chrIII	820700	821200	Heterochromatin
chrIII	821200	822200	Heterochromatin
chrIII	822200	822800	Heterochromatin
chrIII	822800	823200	Heterochromatin
chrIII	823200	824300	Heterochromatin
chrIII	824300	825300	Heterochromatin
chrIII	825300	825400	H3K27me3 repressed
chrIII	825400	825700	Heterochromatin
chrIII	825700	828200	Heterochromatin
chrIII	828200	828600	H3K27me3 repressed
chrIII	828600	829800	Heterochromatin
chrIII	829800	831000	Heterochromatin
chrIII	831000	831700	Heterochromatin
chrIII	831700	832300	H3K27me3 repressed
chrIII	832300	832500	Heterochromatin
chrIII	832500	832600	H3K27me3 repressed
chrIII	832600	832900	Heterochromatin
chrIII	832900	833300	H3K27me3 repressed
chrIII	833300	833700	Active enhancer
chrIII	833700	833900	Active enhancer
chrIII	833900	834500	TSS/Promoter
chrIII	834500	835700	H3K27me3 repressed
chrIII	835700	835900	Heterochromatin
chrIII	835900	836100	H3K27me3 repressed
chrIII	836100	836800	Heterochromatin
chrIII	836800	841500	Heterochromatin
chrIII	841500	843200	Heterochromatin
chrIII	843200	844000	H3K27me3 repressed
chrIII	844000	845500	Active enhancer
chrIII	845500	845700	TSS/Promoter
chrIII	845700	845800	TSS/Promoter
chrIII	845800	846200	TSS/Promoter
chrIII	846200	846400	Transcribed gene body
chrIII	846400	847000	Transcribed gene body
chrIII	847000	847300	Transcribed gene body
chrIII	847300	848100	Transcribed gene body
chrIII	848100	848300	Transcribed gene body
chrIII	848300	848400	Transcribed gene body
chrIII	848400	849800	Transcribed gene body
chrIII	849800	850300	Transcribed gene body
chrIII	850300	851500	Transcribed gene body
chrIII	851500	851800	Transcribed gene body
chrIII	851800	852100	Transcribed gene body
chrIII	852100	852200	Transcribed gene body
chrIII	852200	852400	Transcribed gene body
chrIII	852400	852900	Transcribed gene body
chrIII	852900	853000	Transcribed gene body
chrIII	853000	853300	Transcribed gene body
chrIII	853300	853600	Transcribed gene body
chrIII	853600	854000	TSS/Promoter
chrIII	854000	854300	TSS/Promoter
chrIII	854300	854800	TSS/Promoter
chrIII	854800	855100	Transcribed gene body
chrIII	855100	855300	Transcribed gene body
chrIII	855300	855400	Transcribed gene body
chrIII	855400	858300	Transcribed gene body
chrIII	858300	858500	TSS/Promoter
chrIII	858500	859000	TSS/Promoter
chrIII	859000	859300	Active enhancer
chrIII	859300	860900	Transcribed gene body
chrIII	860900	861100	Transcribed gene body
chrIII	861100	861400	Transcribed gene body
chrIII	861400	861700	Low signal
chrIII	861700	862100	TSS/Promoter
chrIII	862100	862700	TSS/Promoter
chrIII	862700	862800	Transcribed gene body
chrIII	862800	863400	Transcribed gene body
chrIII	863400	863800	Transcribed gene body
chrIII	863800	864500	Low signal
chrIII	864500	864800	Transcribed gene body
chrIII	864800	865000	Transcribed gene body
chrIII	865000	865700	Transcribed gene body
chrIII	865700	865800	Low signal
chrIII	865800	866500	Active enhancer
chrIII	866500	867200	Active enhancer
chrIII	867200	867300	TSS/Promoter
chrIII	867300	867800	Transcribed gene body
chrIII	867800	868500	TSS/Promoter
chrIII	868500	868900	TSS/Promoter
chrIII	868900	870100	TSS/Promoter
chrIII	870100	870600	TSS/Promoter
chrIII	870600	870800	Active enhancer
chrIII	870800	871900	Active enhancer
chrIII	871900	872100	Repressed enhancer
chrIII	872100	872400	H3K27me3 repressed
chrIII	872400	872500	Heterochromatin
chrIII	872500	873200	H3K27me3 repressed
chrIII	873200	874300	Heterochromatin
chrIII	874300	874600	H3K27me3 repressed
chrIII	874600	874800	Heterochromatin
chrIII	874800	874900	H3K27me3 repressed
chrIII	874900	875000	Heterochromatin
chrIII	875000	875600	H3K27me3 repressed
chrIII	875600	875700	Low signal
chrIII	875700	876000	Repressed enhancer
chrIII	876000	876200	Active enhancer
chrIII	876200	876400	Active enhancer
chrIII	876400	876500	Active enhancer
chrIII	876500	877500	Active enhancer
chrIII	877500	877600	Low signal
chrIII	877600	879200	Transcribed gene body
chrIII	879200	879700	Low signal
chrIII	879700	881200	Transcribed gene body
chrIII	881200	882500	Transcribed gene body
chrIII	882500	882700	Transcribed gene body
chrIII	882700	884200	Transcribed gene body
chrIII	884200	884800	Transcribed gene body
chrIII	884800	885500	Transcribed gene body
chrIII	885500	885700	Transcribed gene body
chrIII	885700	886500	Transcribed gene body
chrIII	886500	887000	TSS/Promoter
chrIII	887000	889100	TSS/Promoter
chrIII	889100	889300	Active enhancer
chrIII	889300	889900	Active enhancer
chrIII	889900	891400	Transcribed gene body
chrIII	891400	893200	Transcribed gene body
chrIII	893200	893500	Transcribed gene body
chrIII	893500	894700	Transcribed gene body
chrIII	894700	894800	Transcribed gene body
chrIII	894800	895600	TSS/Promoter
chrIII	895600	895800	TSS/Promoter
chrIII	895800	896200	TSS/Promoter
chrIII	896200	896500	Transcribed gene body
chrIII	896500	897100	Transcribed gene body
chrIII	897100	900400	Transcribed gene body
chrIII	900400	901000	Transcribed gene body
chrIII	901000	901300	Transcribed gene body
chrIII	901300	901500	TSS/Promoter
chrIII	901500	901800	TSS/Promoter
chrIII	901800	901900	TSS/Promoter
chrIII	901900	902400	TSS/Promoter
chrIII	902400	902700	TSS/Promoter
chrIII	902700	902800	Transcribed gene body
chrIII	902800	903000	Transcribed gene body
chrIII	903000	903100	Transcribed gene body
chrIII	903100	903700	Transcribed gene body
chrIII	903700	904300	Transcribed gene body
chrIII	904300	904800	Transcribed gene body
chrIII	904800	905000	Transcribed gene body
chrIII	905000	905400	Transcribed gene body
chrIII	905400	907100	Transcribed gene body
chrIII	907100	907500	Transcribed gene body
chrIII	907500	907700	Transcribed gene body
chrIII	907700	908200	Active enhancer
chrIII	908200	908300	Transcribed gene body
chrIII	908300	908400	Transcribed gene body
chrIII	908400	908600	Transcribed gene body
chrIII	908600	908900	Transcribed gene body
chrIII	908900	909000	Transcribed gene body
chrIII	909000	909200	Transcribed gene body
chrIII	909200	909900	Transcribed gene body
chrIII	909900	910100	Transcribed gene body
chrIII	910100	910200	Transcribed gene body
chrIII	910200	910600	TSS/Promoter
chrIII	910600	910800	TSS/Promoter
chrIII	910800	911100	TSS/Promoter
chrIII	911100	911200	TSS/Promoter
chrIII	911200	911600	TSS/Promoter
chrIII	911600	912100	Transcribed gene body
chrIII	912100	912200	Transcribed gene body
chrIII	912200	912600	Low signal
chrIII	912600	917200	Heterochromatin
chrIII	917200	918200	Heterochromatin
chrIII	918200	918600	Heterochromatin
chrIII	918600	918900	Heterochromatin
chrIII	918900	919700	Heterochromatin
chrIII	919700	920000	Low signal
chrIII	920000	920100	H3K27me3 repressed
chrIII	920100	921200	Low signal
chrIII	921200	921600	H3K27me3 repressed
chrIII	921600	922600	Low signal
chrIII	922600	922700	H3K27me3 repressed
chrIII	922700	923400	Low signal
chrIII	923400	923700	H3K27me3 repressed
chrIII	923700	924800	Low signal
chrIII	924800	925200	H3K27me3 repressed
chrIII	925200	929100	Low signal
chrIII	929100	929200	H3K27me3 repressed
chrIII	929200	930500	Low signal
chrIII	930500	930600	H3K27me3 repressed
chrIII	930600	930900	Low signal
chrIII	930900	931000	H3K27me3 repressed
chrIII	931000	931400	Low signal
chrIII	931400	931800	H3K27me3 repressed
chrIII	931800	932200	Low signal
chrIII	932200	932600	Active enhancer
chrIII	932600	932700	Active enhancer
chrIII	932700	933000	Low signal
chrIII	933000	933900	Heterochromatin
chrIII	933900	934400	Heterochromatin
chrIII	934400	934500	H3K27me3 repressed
chrIII	934500	935500	Low signal
chrIII	935500	936000	Heterochromatin
chrIII	936000	937100	Heterochromatin
chrIII	937100	937500	Heterochromatin
chrIII	937500	938000	Heterochromatin
chrIII	938000	938500	Heterochromatin
chrIII	938500	939000	Heterochromatin
chrIII	939000	941000	Heterochromatin
chrIII	941000	943600	Heterochromatin
chrIII	943600	945200	Heterochromatin
chrIII	945200	945800	Heterochromatin
chrIII	945800	946100	Heterochromatin
chrIII	946100	946200	Heterochromatin
chrIII	946200	946600	Heterochromatin
chrIII	946600	948300	Heterochromatin
chrIII	948300	948800	Heterochromatin
chrIII	948800	949000	Heterochromatin
chrIII	949000	950300	Heterochromatin
chrIII	950300	950700	H3K27me3 repressed
chrIII	950700	950900	Heterochromatin
chrIII	950900	951700	Heterochromatin
chrIII	951700	952700	Heterochromatin
chrIII	952700	952900	H3K27me3 repressed
chrIII	952900	953000	H3K27me3 repressed
chrIII	953000	953700	Low signal
chrIII	953700	954000	H3K27me3 repressed
chrIII	954000	954200	Low signal
chrIII	954200	954500	H3K27me3 repressed
chrIII	954500	955000	Low signal
chrIII	955000	955100	H3K27me3 repressed
chrIII	955100	957100	Heterochromatin
chrIII	957100	957500	Heterochromatin
chrIII	957500	957600	H3K27me3 repressed
chrIII	957600	958000	Low signal
chrIII	958000	958100	H3K27me3 repressed
chrIII	958100	958200	Low signal
chrIII	958200	958300	H3K27me3 repressed
chrIII	958300	958700	Low signal
chrIII	958700	958900	Heterochromatin
chrIII	958900	960500	Low signal
chrIII	960500	961100	Heterochromatin
chrIII	961100	961400	H3K27me3 repressed
chrIII	961400	961600	Heterochromatin
chrIII	961600	962000	H3K27me3 repressed
chrIII	962000	962300	Heterochromatin
chrIII	962300	962400	Heterochromatin
chrIII	962400	962900	Heterochromatin
chrIII	962900	963300	Heterochromatin
chrIII	963300	963900	Heterochromatin
chrIII	963900	965400	Heterochromatin
chrIII	965400	967100	H3K27me3 repressed
chrIII	967100	971500	Heterochromatin
chrIII	971500	973200	Heterochromatin
chrIII	973200	975000	Heterochromatin
chrIII	975000	975600	Low signal
chrIII	975600	975800	H3K27me3 repressed
chrIII	975800	977800	Heterochromatin
chrIII	977800	978200	Heterochromatin
chrIII	978200	978500	Heterochromatin
chrIII	978500	979000	Heterochromatin
chrIII	979000	979400	Heterochromatin
chrIII	979400	979500	H3K27me3 repressed
chrIII	979500	980100	Low signal
chrIII	980100	980300	Low signal
chrIII	980300	980700	Active enhancer
chrIII	980700	981500	Active enhancer
chrIII	981500	982700	TSS/Promoter
chrIII	982700	983300	Transcribed gene body
chrIII	983300	983600	Transcribed gene body
chrIII	983600	984000	Transcribed gene body
chrIII	984000	984800	Transcribed gene body
chrIII	984800	985200	Transcribed gene body
chrIII	985200	986000	Transcribed gene body
chrIII	986000	986100	Transcribed gene body
chrIII	986100	986200	Transcribed gene body
chrIII	986200	987300	Transcribed gene body
chrIII	987300	987600	Transcribed gene body
chrIII	987600	987900	Transcribed gene body
chrIII	987900	988100	Transcribed gene body
chrIII	988100	988400	Transcribed gene body
chrIII	988400	988700	Low signal
chrIII	988700	989100	Low signal
chrIII	989100	989200	H3K27me3 repressed
chrIII	989200	989700	Low signal
chrIII	989700	990100	H3K27me3 repressed
chrIII	990100	991300	Low signal
chrIII	991300	991400	H3K27me3 repressed
chrIII	991400	991800	Low signal
chrIII	991800	992000	H3K27me3 repressed
chrIII	992000	994100	Low signal
chrIII	994100	994400	H3K27me3 repressed
chrIII	994400	995300	Low signal
chrIII	995300	995400	H3K27me3 repressed
chrIII	995400	995800	Low signal
chrIII	995800	995900	H3K27me3 repressed
chrIII	995900	997800	Low signal
chrIII	997800	997900	H3K27me3 repressed
chrIII	997900	998700	Low signal
chrIII	998700	998800	H3K27me3 repressed
chrIII	998800	998900	Low signal
chrIII	998900	999000	H3K27me3 repressed
chrIII	999000	999400	Low signal
chrIII	999400	1000700	Heterochromatin
chrIII	1000700	1002400	Low signal
chrIII	1002400	1003300	Low signal
chrIII	1003300	1003700	H3K27me3 repressed
chrIII	1003700	1005900	Low signal
chrIII	1005900	1006200	H3K27me3 repressed
chrIII	1006200	1006600	Low signal
chrIII	1006600	1007500	H3K27me3 repressed
chrIII	1007500	1007700	Low signal
chrIII	1007700	1007800	H3K27me3 repressed
chrIII	1007800	1008700	Low signal
chrIII	1008700	1008800	H3K27me3 repressed
chrIII	1008800	1008900	Low signal
chrIII	1008900	1009000	H3K27me3 repressed
chrIII	1009000	1009300	Low signal
chrIII	1009300	1009800	H3K27me3 repressed
chrIII	1009800	1010000	Low signal
chrIII	1010000	1010200	H3K27me3 repressed
chrIII	1010200	1010500	Low signal
chrIII	1010500	1010900	H3K27me3 repressed
chrIII	1010900	1011100	Low signal
chrIII	1011100	1011700	H3K27me3 repressed
chrIII	1011700	1011900	Low signal
chrIII	1011900	1012400	Heterochromatin
chrIII	1012400	1014000	Low signal
chrIII	1014000	1015600	Heterochromatin
chrIII	1015600	1016100	Heterochromatin
chrIII	1016100	1016600	Heterochromatin
chrIII	1016600	1016900	Low signal
chrIII	1016900	1017300	H3K27me3 repressed
chrIII	1017300	1021100	Low signal
chrIII	1021100	1021700	H3K27me3 repressed
chrIII	1021700	1022900	Low signal
chrIII	1022900	1023900	Heterochromatin
chrIII	1023900	1024000	Heterochromatin
chrIII	1024000	1024200	Heterochromatin
chrIII	1024200	1025000	Heterochromatin
chrIII	1025000	1026000	Heterochromatin
chrIII	1026000	1026600	Low signal
chrIII	1026600	1028500	Transcribed gene body
chrIII	1028500	1029000	Active enhancer
chrIII	1029000	1029500	Low signal
chrIII	1029500	1035900	Transcribed gene body
chrIII	1035900	1037200	TSS/Promoter
chrIII	1037200	1037500	TSS/Promoter
chrIII	1037500	1037800	TSS/Promoter
chrIII	1037800	1039400	Transcribed gene body
chrIII	1039400	1040100	Low signal
chrIII	1040100	1041000	Transcribed gene body
chrIII	1041000	1042000	Low signal
chrIII	1042000	1042400	Transcribed gene body
chrIII	1042400	1043200	Low signal
chrIII	1043200	1044200	Transcribed gene body
chrIII	1044200	1045600	Low signal
chrIII	1045600	1046000	Transcribed gene body
chrIII	1046000	1047800	Low signal
chrIII	1047800	1048700	Low signal
chrIII	1048700	1048900	H3K27me3 repressed
chrIII	1048900	1049600	Low signal
chrIII	1049600	1050800	Low signal
chrIII	1050800	1051300	Low signal
chrIII	1051300	1051400	H3K27me3 repressed
chrIII	1051400	1051900	Low signal
chrIII	1051900	1052700	H3K27me3 repressed
chrIII	1052700	1052900	Low signal
chrIII	1052900	1053000	Active enhancer
chrIII	1053000	1053200	Active enhancer
chrIII	1053200	1054100	Active enhancer
chrIII	1054100	1054500	Active enhancer
chrIII	1054500	1054600	Repressed enhancer
chrIII	1054600	1056700	Low signal
chrIII	1056700	1056800	Repressed enhancer
chrIII	1056800	1057700	Low signal
chrIII	1057700	1058000	Transcribed gene body
chrIII	1058000	1058300	Low signal
chrIII	1058300	1058600	Repressed enhancer
chrIII	1058600	1059900	Low signal
chrIII	1059900	1060000	Repressed enhancer
chrIII	1060000	1062700	Low signal
chrIII	1062700	1062900	Transcribed gene body
chrIII	1062900	1063300	Low signal
chrIII	1063300	1065800	Transcribed gene body
chrIII	1065800	1066300	Low signal
chrIII	1066300	1066600	Transcribed gene body
chrIII	1066600	1067300	Low signal
chrIII	1067300	1067400	Transcribed gene body
chrIII	1067400	1067600	Transcribed gene body
chrIII	1067600	1068400	Transcribed gene body
chrIII	1068400	1068700	Low signal
chrIII	1068700	1073100	Transcribed gene body
chrIII	1073100	1074000	Low signal
chrIII	1074000	1074200	Transcribed gene body
chrIII	1074200	1074500	Transcribed gene body
chrIII	1074500	1074600	Transcribed gene body
chrIII	1074600	1074700	Low signal
chrIII	1074700	1074900	Active enhancer
chrIII	1074900	1076400	TSS/Promoter
chrIII	1076400	1076500	Transcribed gene body
chrIII	1076500	1076600	Transcribed gene body
chrIII	1076600	1077100	Low signal
chrIII	1077100	1077200	Transcribed gene body
chrIII	1077200	1077900	TSS/Promoter
chrIII	1077900	1078400	TSS/Promoter
chrIII	1078400	1078500	TSS/Promoter
chrIII	1078500	1080500	TSS/Promoter
chrIII	1080500	1080700	TSS/Promoter
chrIII	1080700	1080900	TSS/Promoter
chrIII	1080900	1082300	TSS/Promoter
chrIII	1082300	1082800	Transcribed gene body
chrIII	1082800	1083100	Transcribed gene body
chrIII	1083100	1083300	Transcribed gene body
chrIII	1083300	1083800	Transcribed gene body
chrIII	1083800	1083900	Transcribed gene body
chrIII	1083900	1084100	TSS/Promoter
chrIII	1084100	1084300	Transcribed gene body
chrIII	1084300	1084700	TSS/Promoter
chrIII	1084700	1085100	TSS/Promoter
chrIII	1085100	1085800	TSS/Promoter
chrIII	1085800	1086000	TSS/Promoter
chrIII	1086000	1086600	Transcribed gene body
chrIII	1086600	1087000	Transcribed gene body
chrIII	1087000	1087400	Heterochromatin
chrIII	1087400	1087500	H3K27me3 repressed
chrIII	1087500	1087700	Heterochromatin
chrIII	1087700	1088600	Transcribed gene body
chrIII	1088600	1089000	Low signal
chrIII	1089000	1090900	Low signal
chrIII	1090900	1091100	Heterochromatin
chrIII	1091100	1091300	H3K27me3 repressed
chrIII	1091300	1091400	Low signal
chrIII	1091400	1091900	Transcribed gene body
chrIII	1091900	1092500	Low signal
chrIII	1092500	1093500	Transcribed gene body
chrIII	1093500	1094200	Low signal
chrIII	1094200	1094400	Repressed enhancer
chrIII	1094400	1096500	Low signal
chrIII	1096500	1096600	Repressed enhancer
chrIII	1096600	1098100	Low signal
chrIII	1098100	1098600	Repressed enhancer
chrIII	1098600	1098800	Low signal
chrIII	1098800	1099000	Repressed enhancer
chrIII	1099000	1099500	Low signal
chrIII	1099500	1099900	H3K27me3 repressed
chrIII	1099900	1100800	Low signal
chrIII	1100800	1101300	Repressed enhancer
chrIII	1101300	1101400	Low signal
chrIII	1101400	1101600	Low signal
chrIII	1101600	1101800	H3K27me3 repressed
chrIII	1101800	1102000	Low signal
chrIII	1102000	1102300	Repressed enhancer
chrIII	1102300	1104300	Low signal
chrIII	1104300	1104500	H3K27me3 repressed
chrIII	1104500	1105500	Low signal
chrIII	1105500	1105600	H3K27me3 repressed
chrIII	1105600	1107000	Low signal
chrIII	1107000	1107200	H3K27me3 repressed
chrIII	1107200	1108100	Low signal
chrIII	1108100	1108300	H3K27me3 repressed
chrIII	1108300	1108500	Low signal
chrIII	1108500	1108600	H3K27me3 repressed
chrIII	1108600	1110300	Low signal
chrIII	1110300	1110400	H3K27me3 repressed
chrIII	1110400	1110500	Low signal
chrIII	1110500	1110600	H3K27me3 repressed
chrIII	1110600	1111700	Low signal
chrIII	1111700	1111800	H3K27me3 repressed
chrIII	1111800	1112100	Low signal
chrIII	1112100	1112200	H3K27me3 repressed
chrIII	1112200	1113000	Low signal
chrIII	1113000	1113300	H3K27me3 repressed
chrIII	1113300	1113700	Low signal
chrIII	1113700	1116000	Low signal
chrIII	1116000	1116500	Active enhancer
chrIII	1116500	1117100	TSS/Promoter
chrIII	1117100	1117300	Active enhancer
chrIII	1117300	1117900	Low signal
chrIII	1117900	1118000	H3K27me3 repressed
chrIII	1118000	1119400	Heterochromatin
chrIII	1119400	1119600	Heterochromatin
chrIII	1119600	1120400	Heterochromatin
chrIII	1120400	1120700	Heterochromatin
chrIII	1120700	1121400	Heterochromatin
chrIII	1121400	1121500	H3K27me3 repressed
chrIII	1121500	1121600	Heterochromatin
chrIII	1121600	1121700	Low signal
chrIII	1121700	1122100	Low signal
chrIII	1122100	1122500	H3K27me3 repressed
chrIII	1122500	1123100	Heterochromatin
chrIII	1123100	1124000	Low signal
chrIII	1124000	1124100	H3K27me3 repressed
chrIII	1124100	1124800	Heterochromatin
chrIII	1124800	1127000	Low signal
chrIII	1127000	1127100	H3K27me3 repressed
chrIII	1127100	1128200	Low signal
chrIII	1128200	1132700	Low signal
chrIII	1132700	1133400	Low signal
chrIII	1133400	1133600	H3K27me3 repressed
chrIII	1133600	1134600	Low signal
chrIII	1134600	1135200	H3K27me3 repressed
chrIII	1135200	1136900	Low signal
chrIII	1136900	1137700	H3K27me3 repressed
chrIII	1137700	1138300	Low signal
chrIII	1138300	1141900	Low signal
chrIII	1141900	1142000	H3K27me3 repressed
chrIII	1142000	1142500	Heterochromatin
chrIII	1142500	1142700	Active enhancer
chrIII	1142700	1143200	TSS/Promoter
chrIII	1143200	1144000	TSS/Promoter
chrIII	1144000	1144100	Transcribed gene body
chrIII	1144100	1145400	Transcribed gene body
chrIII	1145400	1146900	Low signal
chrIII	1146900	1147000	H3K27me3 repressed
chrIII	1147000	1147400	Heterochromatin
chrIII	1147400	1147500	H3K27me3 repressed
chrIII	1147500	1147800	Low signal
chrIII	1147800	1148200	H3K27me3 repressed
chrIII	1148200	1149200	Low signal
chrIII	1149200	1149300	Repressed enhancer
chrIII	1149300	1149500	Low signal
chrIII	1149500	1149800	Repressed enhancer
chrIII	1149800	1151800	Low signal
chrIII	1151800	1151900	Repressed enhancer
chrIII	1151900	1152700	Low signal
chrIII	1152700	1152900	Repressed enhancer
chrIII	1152900	1153400	Low signal
chrIII	1153400	1153700	Repressed enhancer
chrIII	1153700	1154300	Low signal
chrIII	1154300	1154900	Low signal
chrIII	1154900	1155200	H3K27me3 repressed
chrIII	1155200	1157100	Low signal
chrIII	1157100	1157200	H3K27me3 repressed
chrIII	1157200	1157500	Low signal
chrIII	1157500	1159100	H3K27me3 repressed
chrIII	1159100	1159400	Low signal
chrIII	1159400	1159500	H3K27me3 repressed
chrIII	1159500	1159900	Low signal
chrIII	1159900	1160000	H3K27me3 repressed
chrIII	1160000	1160400	Low signal
chrIII	1160400	1160900	Repressed enhancer
chrIII	1160900	1161100	Low signal
chrIII	1161100	1161200	H3K27me3 repressed
chrIII	1161200	1161500	Heterochromatin
chrIII	1161500	1161700	H3K27me3 repressed
chrIII	1161700	1161800	Repressed enhancer
chrIII	1161800	1162000	Low signal
chrIII	1162000	1162300	Active enhancer
chrIII	1162300	1163200	H3K27me3 repressed
chrIII	1163200	1163500	Heterochromatin
chrIII	1163500	1163900	H3K27me3 repressed
chrIII	1163900	1164100	Heterochromatin
chrIII	1164100	1164700	H3K27me3 repressed
chrIII	1164700	1164800	Heterochromatin
chrIII	1164800	1165200	H3K27me3 repressed
chrIII	1165200	1165500	Heterochromatin
chrIII	1165500	1165700	Heterochromatin
chrIII	1165700	1165900	Heterochromatin
chrIII	1165900	1166500	Heterochromatin
chrIII	1166500	1166600	Heterochromatin
chrIII	1166600	1167000	Heterochromatin
chrIII	1167000	1167200	Heterochromatin
chrIII	1167200	1167900	Heterochromatin
chrIII	1167900	1168900	Heterochromatin
chrIII	1168900	1169000	Heterochromatin
chrIII	1169000	1169400	H3K27me3 repressed
chrIII	1169400	1169600	Low signal
chrIII	1169600	1169800	Heterochromatin
chrIII	1169800	1174500	Heterochromatin
chrIII	1174500	1174800	Heterochromatin
chrIII	1174800	1176400	Heterochromatin
chrIII	1176400	1177100	Heterochromatin
chrIII	1177100	1177300	Heterochromatin
chrIII	1177300	1177700	Heterochromatin
chrIII	1177700	1178100	Heterochromatin
chrIII	1178100	1178700	Heterochromatin
chrIII	1178700	1179200	Heterochromatin
chrIII	1179200	1183000	Heterochromatin
chrIII	1183000	1183300	H3K27me3 repressed
chrIII	1183300	1183800	Heterochromatin
chrIII	1183800	1186000	Low signal
chrIII	1186000	1187300	Heterochromatin
chrIII	1187300	1187400	Transcribed gene body
chrIII	1187400	1189000	Low signal
chrIII	1189000	1189500	Transcribed gene body
chrIII	1189500	1190100	Low signal
chrIII	1190100	1198400	Transcribed gene body
chrIII	1198400	1198600	Transcribed gene body
chrIII	1198600	1199300	Transcribed gene body
chrIII	1199300	1199500	Transcribed gene body
chrIII	1199500	1199700	Transcribed gene body
chrIII	1199700	1200200	Transcribed gene body
chrIII	1200200	1200500	Transcribed gene body
chrIII	1200500	1201000	Transcribed gene body
chrIII	1201000	1201100	Transcribed gene body
chrIII	1201100	1201200	Transcribed gene body
chrIII	1201200	1201300	Transcribed gene body
chrIII	1201300	1202200	TSS/Promoter
chrIII	1202200	1202500	TSS/Promoter
chrIII	1202500	1203500	TSS/Promoter
chrIII	1203500	1203600	Transcribed gene body
chrIII	1203600	1203900	Transcribed gene body
chrIII	1203900	1204200	TSS/Promoter
chrIII	1204200	1205300	Transcribed gene body
chrIII	1205300	1205800	Transcribed gene body
chrIII	1205800	1206500	Transcribed gene body
chrIII	1206500	1206600	Low signal
chrIII	1206600	1206800	Active enhancer
chrIII	1206800	1206900	Active enhancer
chrIII	1206900	1207100	TSS/Promoter
chrIII	1207100	1207200	Transcribed gene body
chrIII	1207200	1208400	TSS/Promoter
chrIII	1208400	1209000	TSS/Promoter
chrIII	1209000	1209200	Transcribed gene body
chrIII	1209200	1209500	Transcribed gene body
chrIII	1209500	1210200	Transcribed gene body
chrIII	1210200	1210800	Low signal
chrIII	1210800	1211400	Transcribed gene body
chrIII	1211400	1211500	Transcribed gene body
chrIII	1211500	1212500	Low signal
chrIII	1212500	1212600	Low signal
chrIII	1212600	1215200	Heterochromatin
chrIII	1215200	1215500	Heterochromatin
chrIII	1215500	1216700	Low signal
chrIII	1216700	1216800	H3K27me3 repressed
chrIII	1216800	1217100	Low signal
chrIII	1217100	1217600	Heterochromatin
chrIII	1217600	1217800	Transcribed gene body
chrIII	1217800	1218000	Low signal
chrIII	1218000	1218100	Repressed enhancer
chrIII	1218100	1218500	Low signal
chrIII	1218500	1218600	Repressed enhancer
chrIII	1218600	1218900	Transcribed gene body
chrIII	1218900	1219400	Heterochromatin
chrIII	1219400	1219800	H3K27me3 repressed
chrIII	1219800	1221100	Heterochromatin
chrIII	1221100	1222000	Heterochromatin
chrIII	1222000	1222200	Heterochromatin
chrIII	1222200	1222500	H3K27me3 repressed
chrIII	1222500	1223200	Low signal
chrIII	1223200	1223300	Repressed enhancer
chrIII	1223300	1223400	Low signal
chrIII	1223400	1223500	Repressed enhancer
chrIII	1223500	1224400	Active enhancer
chrIII	1224400	1224700	Low signal
chrIII	1224700	1225800	Repressed enhancer
chrIII	1225800	1226200	Low signal
chrIII	1226200	1226600	Repressed enhancer
chrIII	1226600	1228400	Low signal
chrIII	1228400	1228600	Active enhancer
chrIII	1228600	1228800	Active enhancer
chrIII	1228800	1229000	Active enhancer
chrIII	1229000	1229100	H3K27me3 repressed
chrIII	1229100	1229500	Heterochromatin
chrIII	1229500	1229600	Repressed enhancer
chrIII	1229600	1230000	Low signal
chrIII	1230000	1230500	Repressed enhancer
chrIII	1230500	1231100	Low signal
chrIII	1231100	1231200	Repressed enhancer
chrIII	1231200	1231500	Low signal
chrIII	1231500	1231900	Repressed enhancer
chrIII	1231900	1232000	H3K27me3 repressed
chrIII	1232000	1232300	Low signal
chrIII	1232300	1232600	Repressed enhancer
chrIII	1232600	1233100	Low signal
chrIII	1233100	1233900	Repressed enhancer
chrIII	1233900	1234500	Low signal
chrIII	1234500	1234600	Repressed enhancer
chrIII	1234600	1234800	Low signal
chrIII	1234800	1235100	Repressed enhancer
chrIII	1235100	1235600	Low signal
chrIII	1235600	1236000	Heterochromatin
chrIII	1236000	1237900	Heterochromatin
chrIII	1237900	1238400	H3K27me3 repressed
chrIII	1238400	1238800	Heterochromatin
chrIII	1238800	1238900	H3K27me3 repressed
chrIII	1238900	1239000	Heterochromatin
chrIII	1239000	1239300	Low signal
chrIII	1239300	1239600	H3K27me3 repressed
chrIII	1239600	1240100	Low signal
chrIII	1240100	1240200	H3K27me3 repressed
chrIII	1240200	1240300	Low signal
chrIII	1240300	1240400	H3K27me3 repressed
chrIII	1240400	1240500	Low signal
chrIII	1240500	1240600	H3K27me3 repressed
chrIII	1240600	1241100	Low signal
chrIII	1241100	1241400	H3K27me3 repressed
chrIII	1241400	1241600	Low signal
chrIII	1241600	1241700	H3K27me3 repressed
chrIII	1241700	1242500	Low signal
chrIII	1242500	1242700	H3K27me3 repressed
chrIII	1242700	1243100	Low signal
chrIII	1243100	1243700	Repressed enhancer
chrIII	1243700	1244700	Low signal
chrIII	1244700	1245100	H3K27me3 repressed
chrIII	1245100	1247700	Low signal
chrIII	1247700	1248200	H3K27me3 repressed
chrIII	1248200	1248400	Heterochromatin
chrIII	1248400	1248900	Heterochromatin
chrIII	1248900	1249100	H3K27me3 repressed
chrIII	1249100	1249300	Active enhancer
chrIII	1249300	1249400	Active enhancer
chrIII	1249400	1249500	Active enhancer
chrIII	1249500	1249600	H3K27me3 repressed
chrIII	1249600	1249900	Heterochromatin
chrIII	1249900	1250200	H3K27me3 repressed
chrIII	1250200	1250300	Heterochromatin
chrIII	1250300	1253000	Low signal
chrIII	1253000	1253300	H3K27me3 repressed
chrIII	1253300	1258400	Low signal
chrIII	1258400	1258700	Heterochromatin
chrIII	1258700	1261300	Low signal
chrIII	1261300	1261600	H3K27me3 repressed
chrIII	1261600	1266900	Low signal
chrIII	1266900	1267000	Heterochromatin
chrIII	1267000	1267300	H3K27me3 repressed
chrIII	1267300	1268000	Heterochromatin
chrIII	1268000	1268900	Heterochromatin
chrIII	1268900	1269700	Heterochromatin
chrIII	1269700	1270400	Heterochromatin
[truncated: 152,580 more rows]
