# Supplementary material for: Chromatin accessibility dynamics reveal novel functional enhancers in C. elegans
Source: Genome Res. 2017 Dec;27(12):2096–107. doi: 10.1101/gr.226233.117 (PMC5741055; doi:10.1101/gr.226233.117)
Supplement: Supplemental Material [file supp_gr.226233.117_Supplemental_Table_S10.xlsx]

## Sheet: S10 - L3 ChromHMM predictions
chrIII	0	100	Heterochromatin
chrIII	100	400	H3K27me3 repressed
chrIII	400	500	H3K27me3 repressed
chrIII	500	800	Low signal
chrIII	800	1000	H3K27me3 repressed
chrIII	1000	2400	Low signal
chrIII	2400	2700	Heterochromatin
chrIII	2700	2800	H3K27me3 repressed
chrIII	2800	4900	Low signal
chrIII	4900	5000	Repressed enhancer
chrIII	5000	6000	Low signal
chrIII	6000	6100	Repressed enhancer
chrIII	6100	6800	Low signal
chrIII	6800	6900	Repressed enhancer
chrIII	6900	8100	Low signal
chrIII	8100	8400	Repressed enhancer
chrIII	8400	8600	Low signal
chrIII	8600	9200	Low signal
chrIII	9200	10600	Heterochromatin
chrIII	10600	10900	Low signal
chrIII	10900	11100	H3K27me3 repressed
chrIII	11100	11700	Low signal
chrIII	11700	11800	H3K27me3 repressed
chrIII	11800	12300	Heterochromatin
chrIII	12300	12400	H3K27me3 repressed
chrIII	12400	13000	Heterochromatin
chrIII	13000	13500	Transcribed gene body
chrIII	13500	13600	Transcribed gene body
chrIII	13600	13900	Transcribed gene body
chrIII	13900	14100	Transcribed gene body
chrIII	14100	14300	Heterochromatin
chrIII	14300	14700	H3K27me3 repressed
chrIII	14700	15000	Low signal
chrIII	15000	15600	Active enhancer
chrIII	15600	15800	TSS/Promoter
chrIII	15800	16000	Active enhancer
chrIII	16000	16300	TSS/Promoter
chrIII	16300	16500	Transcribed gene body
chrIII	16500	16600	Transcribed gene body
chrIII	16600	16800	Transcribed gene body
chrIII	16800	16900	Transcribed gene body
chrIII	16900	17500	Low signal
chrIII	17500	17600	H3K27me3 repressed
chrIII	17600	17900	Heterochromatin
chrIII	17900	18000	Transcribed gene body
chrIII	18000	18100	TSS/Promoter
chrIII	18100	19000	TSS/Promoter
chrIII	19000	19700	Low signal
chrIII	19700	20600	Repressed enhancer
chrIII	20600	20800	Low signal
chrIII	20800	20900	Transcribed gene body
chrIII	20900	21200	Transcribed gene body
chrIII	21200	21500	Transcribed gene body
chrIII	21500	21800	Transcribed gene body
chrIII	21800	22600	Transcribed gene body
chrIII	22600	22700	Transcribed gene body
chrIII	22700	23100	Transcribed gene body
chrIII	23100	23800	Transcribed gene body
chrIII	23800	23900	Transcribed gene body
chrIII	23900	24100	Transcribed gene body
chrIII	24100	24300	Transcribed gene body
chrIII	24300	25400	Active enhancer
chrIII	25400	25600	TSS/Promoter
chrIII	25600	25700	TSS/Promoter
chrIII	25700	25900	TSS/Promoter
chrIII	25900	26100	Active enhancer
chrIII	26100	26300	Active enhancer
chrIII	26300	26600	Transcribed gene body
chrIII	26600	27000	Transcribed gene body
chrIII	27000	27400	Active enhancer
chrIII	27400	28900	Active enhancer
chrIII	28900	29000	Active enhancer
chrIII	29000	29200	Transcribed gene body
chrIII	29200	29500	Active enhancer
chrIII	29500	30900	Active enhancer
chrIII	30900	31000	Active enhancer
chrIII	31000	31200	Active enhancer
chrIII	31200	31300	Active enhancer
chrIII	31300	32200	Active enhancer
chrIII	32200	32300	Active enhancer
chrIII	32300	32700	Active enhancer
chrIII	32700	32900	Active enhancer
chrIII	32900	33200	Repressed enhancer
chrIII	33200	33500	H3K27me3 repressed
chrIII	33500	33800	Low signal
chrIII	33800	34000	Repressed enhancer
chrIII	34000	34100	Active enhancer
chrIII	34100	34400	Active enhancer
chrIII	34400	34500	Active enhancer
chrIII	34500	34600	Repressed enhancer
chrIII	34600	34700	Low signal
chrIII	34700	34900	H3K27me3 repressed
chrIII	34900	35100	Heterochromatin
chrIII	35100	35300	Heterochromatin
chrIII	35300	36100	Low signal
chrIII	36100	36200	H3K27me3 repressed
chrIII	36200	36700	Low signal
chrIII	36700	37000	Heterochromatin
chrIII	37000	37300	Heterochromatin
chrIII	37300	37800	Heterochromatin
chrIII	37800	38700	Low signal
chrIII	38700	38800	H3K27me3 repressed
chrIII	38800	39400	Low signal
chrIII	39400	40000	Repressed enhancer
chrIII	40000	40300	Low signal
chrIII	40300	40400	Repressed enhancer
chrIII	40400	40600	Low signal
chrIII	40600	40700	Repressed enhancer
chrIII	40700	40800	H3K27me3 repressed
chrIII	40800	41100	Heterochromatin
chrIII	41100	41900	Heterochromatin
chrIII	41900	42200	Heterochromatin
chrIII	42200	43400	Heterochromatin
chrIII	43400	43800	Low signal
chrIII	43800	43900	H3K27me3 repressed
chrIII	43900	44700	Low signal
chrIII	44700	48000	Heterochromatin
chrIII	48000	48500	Low signal
chrIII	48500	48600	H3K27me3 repressed
chrIII	48600	49200	Low signal
chrIII	49200	49500	H3K27me3 repressed
chrIII	49500	50300	Low signal
chrIII	50300	50800	H3K27me3 repressed
chrIII	50800	51000	Repressed enhancer
chrIII	51000	51700	Low signal
chrIII	51700	51900	Heterochromatin
chrIII	51900	52900	Heterochromatin
chrIII	52900	53100	H3K27me3 repressed
chrIII	53100	53800	Heterochromatin
chrIII	53800	54100	H3K27me3 repressed
chrIII	54100	55300	Low signal
chrIII	55300	55500	H3K27me3 repressed
chrIII	55500	56300	Low signal
chrIII	56300	56500	H3K27me3 repressed
chrIII	56500	57300	Low signal
chrIII	57300	57400	H3K27me3 repressed
chrIII	57400	57500	H3K27me3 repressed
chrIII	57500	58000	Heterochromatin
chrIII	58000	58100	H3K27me3 repressed
chrIII	58100	59600	Heterochromatin
chrIII	59600	59700	H3K27me3 repressed
chrIII	59700	62500	Low signal
chrIII	62500	63400	Low signal
chrIII	63400	63500	TSS/Promoter
chrIII	63500	64000	TSS/Promoter
chrIII	64000	64300	Transcribed gene body
chrIII	64300	64400	Transcribed gene body
chrIII	64400	65400	Transcribed gene body
chrIII	65400	65600	Transcribed gene body
chrIII	65600	65700	TSS/Promoter
chrIII	65700	65900	TSS/Promoter
chrIII	65900	67100	TSS/Promoter
chrIII	67100	67200	TSS/Promoter
chrIII	67200	67300	Low signal
chrIII	67300	67800	Active enhancer
chrIII	67800	68100	Active enhancer
chrIII	68100	68300	Active enhancer
chrIII	68300	68500	Repressed enhancer
chrIII	68500	68900	Low signal
chrIII	68900	69000	Repressed enhancer
chrIII	69000	69200	Low signal
chrIII	69200	69800	Transcribed gene body
chrIII	69800	70000	Low signal
chrIII	70000	70100	Repressed enhancer
chrIII	70100	70400	Low signal
chrIII	70400	72100	Transcribed gene body
chrIII	72100	72400	Transcribed gene body
chrIII	72400	72600	Transcribed gene body
chrIII	72600	73700	Transcribed gene body
chrIII	73700	74400	Transcribed gene body
chrIII	74400	74500	Transcribed gene body
chrIII	74500	74700	Transcribed gene body
chrIII	74700	75700	Transcribed gene body
chrIII	75700	76100	Transcribed gene body
chrIII	76100	76200	Transcribed gene body
chrIII	76200	76800	Transcribed gene body
chrIII	76800	77500	Transcribed gene body
chrIII	77500	77700	Transcribed gene body
chrIII	77700	77800	Transcribed gene body
chrIII	77800	78600	Transcribed gene body
chrIII	78600	79500	Low signal
chrIII	79500	79700	Transcribed gene body
chrIII	79700	79800	Transcribed gene body
chrIII	79800	81300	Transcribed gene body
chrIII	81300	82100	Transcribed gene body
chrIII	82100	82200	Transcribed gene body
chrIII	82200	82300	Transcribed gene body
chrIII	82300	82500	Transcribed gene body
chrIII	82500	82600	Transcribed gene body
chrIII	82600	83600	Transcribed gene body
chrIII	83600	83900	Transcribed gene body
chrIII	83900	85300	Transcribed gene body
chrIII	85300	85600	Transcribed gene body
chrIII	85600	85700	Transcribed gene body
chrIII	85700	85800	Transcribed gene body
chrIII	85800	86100	TSS/Promoter
chrIII	86100	86400	TSS/Promoter
chrIII	86400	86700	TSS/Promoter
chrIII	86700	87800	TSS/Promoter
chrIII	87800	89200	Transcribed gene body
chrIII	89200	90700	Transcribed gene body
chrIII	90700	91000	Transcribed gene body
chrIII	91000	91300	Transcribed gene body
chrIII	91300	91600	Transcribed gene body
chrIII	91600	91900	Transcribed gene body
chrIII	91900	92400	Transcribed gene body
chrIII	92400	92800	Transcribed gene body
chrIII	92800	93300	Transcribed gene body
chrIII	93300	93800	Transcribed gene body
chrIII	93800	93900	Transcribed gene body
chrIII	93900	94200	Transcribed gene body
chrIII	94200	94300	Transcribed gene body
chrIII	94300	94700	Transcribed gene body
chrIII	94700	94800	Active enhancer
chrIII	94800	95000	TSS/Promoter
chrIII	95000	96300	Active enhancer
chrIII	96300	96400	Low signal
chrIII	96400	96900	Repressed enhancer
chrIII	96900	97100	Low signal
chrIII	97100	99300	Low signal
chrIII	99300	99400	H3K27me3 repressed
chrIII	99400	100600	Low signal
chrIII	100600	105600	Low signal
chrIII	105600	105800	H3K27me3 repressed
chrIII	105800	107300	Low signal
chrIII	107300	107400	H3K27me3 repressed
chrIII	107400	107500	Low signal
chrIII	107500	107700	H3K27me3 repressed
chrIII	107700	107800	Low signal
chrIII	107800	107900	TSS/Promoter
chrIII	107900	108000	Low signal
chrIII	108000	108500	Low signal
chrIII	108500	108600	H3K27me3 repressed
chrIII	108600	109000	Low signal
chrIII	109000	109100	H3K27me3 repressed
chrIII	109100	110000	Low signal
chrIII	110000	110100	H3K27me3 repressed
chrIII	110100	111100	Low signal
chrIII	111100	111300	H3K27me3 repressed
chrIII	111300	111500	Low signal
chrIII	111500	111700	Repressed enhancer
chrIII	111700	111900	Low signal
chrIII	111900	112100	Repressed enhancer
chrIII	112100	112500	Low signal
chrIII	112500	112600	Repressed enhancer
chrIII	112600	112900	Low signal
chrIII	112900	113300	Low signal
chrIII	113300	113400	H3K27me3 repressed
chrIII	113400	114000	Low signal
chrIII	114000	114300	H3K27me3 repressed
chrIII	114300	114500	Low signal
chrIII	114500	114700	Repressed enhancer
chrIII	114700	115000	Low signal
chrIII	115000	115100	H3K27me3 repressed
chrIII	115100	115200	Heterochromatin
chrIII	115200	115700	Heterochromatin
chrIII	115700	116000	Heterochromatin
chrIII	116000	116400	Heterochromatin
chrIII	116400	116800	Heterochromatin
chrIII	116800	117100	H3K27me3 repressed
chrIII	117100	117500	Heterochromatin
chrIII	117500	118800	Heterochromatin
chrIII	118800	118900	H3K27me3 repressed
chrIII	118900	120900	Low signal
chrIII	120900	121000	H3K27me3 repressed
chrIII	121000	123200	Heterochromatin
chrIII	123200	123500	Low signal
chrIII	123500	123600	H3K27me3 repressed
chrIII	123600	123800	Low signal
chrIII	123800	123900	H3K27me3 repressed
chrIII	123900	124500	Low signal
chrIII	124500	124600	H3K27me3 repressed
chrIII	124600	125100	Low signal
chrIII	125100	127000	Heterochromatin
chrIII	127000	127200	Heterochromatin
chrIII	127200	128500	Low signal
chrIII	128500	128900	H3K27me3 repressed
chrIII	128900	129800	Low signal
chrIII	129800	129900	H3K27me3 repressed
chrIII	129900	130300	Low signal
chrIII	130300	130400	H3K27me3 repressed
chrIII	130400	130900	Low signal
chrIII	130900	131200	TSS/Promoter
chrIII	131200	131300	Low signal
chrIII	131300	131400	Repressed enhancer
chrIII	131400	131800	TSS/Promoter
chrIII	131800	132400	TSS/Promoter
chrIII	132400	132500	Transcribed gene body
chrIII	132500	133000	Transcribed gene body
chrIII	133000	134000	Transcribed gene body
chrIII	134000	134600	Transcribed gene body
chrIII	134600	134700	Transcribed gene body
chrIII	134700	135200	Low signal
chrIII	135200	135300	H3K27me3 repressed
chrIII	135300	135500	Heterochromatin
chrIII	135500	135600	H3K27me3 repressed
chrIII	135600	136100	Heterochromatin
chrIII	136100	136200	H3K27me3 repressed
chrIII	136200	136800	Heterochromatin
chrIII	136800	137200	H3K27me3 repressed
chrIII	137200	137300	Heterochromatin
chrIII	137300	137500	Heterochromatin
chrIII	137500	140900	Heterochromatin
chrIII	140900	141000	H3K27me3 repressed
chrIII	141000	144200	Low signal
chrIII	144200	144300	H3K27me3 repressed
chrIII	144300	145100	Low signal
chrIII	145100	147000	Heterochromatin
chrIII	147000	147500	H3K27me3 repressed
chrIII	147500	151800	Heterochromatin
chrIII	151800	151900	H3K27me3 repressed
chrIII	151900	152200	Low signal
chrIII	152200	152300	H3K27me3 repressed
chrIII	152300	152600	Low signal
chrIII	152600	153100	H3K27me3 repressed
chrIII	153100	154000	Low signal
chrIII	154000	154100	H3K27me3 repressed
chrIII	154100	154700	Heterochromatin
chrIII	154700	154800	Heterochromatin
chrIII	154800	155000	Heterochromatin
chrIII	155000	155300	Heterochromatin
chrIII	155300	155800	Heterochromatin
chrIII	155800	156500	Heterochromatin
chrIII	156500	156800	Heterochromatin
chrIII	156800	157000	Heterochromatin
chrIII	157000	157400	Heterochromatin
chrIII	157400	158800	Heterochromatin
chrIII	158800	159100	Heterochromatin
chrIII	159100	160600	Heterochromatin
chrIII	160600	160900	H3K27me3 repressed
chrIII	160900	161900	Low signal
chrIII	161900	162400	H3K27me3 repressed
chrIII	162400	163200	Heterochromatin
chrIII	163200	163400	Heterochromatin
chrIII	163400	164000	Heterochromatin
chrIII	164000	164700	Heterochromatin
chrIII	164700	165700	Heterochromatin
chrIII	165700	165900	H3K27me3 repressed
chrIII	165900	166200	Heterochromatin
chrIII	166200	166300	Low signal
chrIII	166300	166600	H3K27me3 repressed
chrIII	166600	167100	Low signal
chrIII	167100	167200	H3K27me3 repressed
chrIII	167200	167900	Low signal
chrIII	167900	168700	Heterochromatin
chrIII	168700	168900	Heterochromatin
chrIII	168900	169200	Heterochromatin
chrIII	169200	170100	Heterochromatin
chrIII	170100	171100	Low signal
chrIII	171100	172300	Heterochromatin
chrIII	172300	172600	Heterochromatin
chrIII	172600	173100	Heterochromatin
chrIII	173100	173300	Heterochromatin
chrIII	173300	174300	Heterochromatin
chrIII	174300	174400	H3K27me3 repressed
chrIII	174400	174800	Heterochromatin
chrIII	174800	175800	Heterochromatin
chrIII	175800	177100	Heterochromatin
chrIII	177100	177900	Heterochromatin
chrIII	177900	178300	Heterochromatin
chrIII	178300	178400	H3K27me3 repressed
chrIII	178400	178700	Heterochromatin
chrIII	178700	178900	H3K27me3 repressed
chrIII	178900	179300	Heterochromatin
chrIII	179300	179700	H3K27me3 repressed
chrIII	179700	181400	Heterochromatin
chrIII	181400	181700	Heterochromatin
chrIII	181700	184600	Heterochromatin
chrIII	184600	184700	H3K27me3 repressed
chrIII	184700	184800	Repressed enhancer
chrIII	184800	185500	Low signal
chrIII	185500	185600	Active enhancer
chrIII	185600	185700	Active enhancer
chrIII	185700	186200	Low signal
chrIII	186200	186600	Transcribed gene body
chrIII	186600	187100	Transcribed gene body
chrIII	187100	187800	Transcribed gene body
chrIII	187800	188100	TSS/Promoter
chrIII	188100	188400	TSS/Promoter
chrIII	188400	188500	TSS/Promoter
chrIII	188500	188600	TSS/Promoter
chrIII	188600	188700	TSS/Promoter
chrIII	188700	188900	TSS/Promoter
chrIII	188900	189800	TSS/Promoter
chrIII	189800	190000	Transcribed gene body
chrIII	190000	190100	Transcribed gene body
chrIII	190100	190300	Transcribed gene body
chrIII	190300	191200	Transcribed gene body
chrIII	191200	191500	Transcribed gene body
chrIII	191500	191900	Transcribed gene body
chrIII	191900	192200	Transcribed gene body
chrIII	192200	192700	Transcribed gene body
chrIII	192700	192800	Transcribed gene body
chrIII	192800	193200	Transcribed gene body
chrIII	193200	193500	Transcribed gene body
chrIII	193500	193600	Transcribed gene body
chrIII	193600	193800	Transcribed gene body
chrIII	193800	194100	Transcribed gene body
chrIII	194100	194200	Transcribed gene body
chrIII	194200	197900	Transcribed gene body
chrIII	197900	198000	Transcribed gene body
chrIII	198000	198700	Low signal
chrIII	198700	198900	Active enhancer
chrIII	198900	199000	Active enhancer
chrIII	199000	200000	Low signal
chrIII	200000	200300	Transcribed gene body
chrIII	200300	201000	Transcribed gene body
chrIII	201000	201100	Transcribed gene body
chrIII	201100	201200	Transcribed gene body
chrIII	201200	201800	Transcribed gene body
chrIII	201800	201900	Transcribed gene body
chrIII	201900	202000	Transcribed gene body
chrIII	202000	202200	Transcribed gene body
chrIII	202200	202400	Transcribed gene body
chrIII	202400	202600	Low signal
chrIII	202600	202700	Heterochromatin
chrIII	202700	202800	H3K27me3 repressed
chrIII	202800	202900	Transcribed gene body
chrIII	202900	203600	Transcribed gene body
chrIII	203600	204100	Low signal
chrIII	204100	204300	H3K27me3 repressed
chrIII	204300	206700	Heterochromatin
chrIII	206700	207100	Heterochromatin
chrIII	207100	207300	Heterochromatin
chrIII	207300	207400	H3K27me3 repressed
chrIII	207400	208000	Heterochromatin
chrIII	208000	208100	H3K27me3 repressed
chrIII	208100	208900	Low signal
chrIII	208900	209000	H3K27me3 repressed
chrIII	209000	210500	Heterochromatin
chrIII	210500	210800	H3K27me3 repressed
chrIII	210800	211400	Heterochromatin
chrIII	211400	211600	H3K27me3 repressed
chrIII	211600	212200	Low signal
chrIII	212200	212700	H3K27me3 repressed
chrIII	212700	213100	Low signal
chrIII	213100	213200	Repressed enhancer
chrIII	213200	213700	Low signal
chrIII	213700	213900	H3K27me3 repressed
chrIII	213900	214600	Low signal
chrIII	214600	215000	H3K27me3 repressed
chrIII	215000	215300	Low signal
chrIII	215300	215500	Low signal
chrIII	215500	215700	Transcribed gene body
chrIII	215700	217500	Low signal
chrIII	217500	217600	Transcribed gene body
chrIII	217600	218100	Transcribed gene body
chrIII	218100	218200	Transcribed gene body
chrIII	218200	218600	Low signal
chrIII	218600	218700	H3K27me3 repressed
chrIII	218700	219600	Low signal
chrIII	219600	220100	Transcribed gene body
chrIII	220100	220700	Transcribed gene body
chrIII	220700	221200	Active enhancer
chrIII	221200	221500	Transcribed gene body
chrIII	221500	221800	Transcribed gene body
chrIII	221800	223500	Transcribed gene body
chrIII	223500	223600	Transcribed gene body
chrIII	223600	223800	Transcribed gene body
chrIII	223800	224200	Transcribed gene body
chrIII	224200	224500	Transcribed gene body
chrIII	224500	225300	Transcribed gene body
chrIII	225300	225600	Transcribed gene body
chrIII	225600	226400	Transcribed gene body
chrIII	226400	226500	Transcribed gene body
chrIII	226500	226900	Transcribed gene body
chrIII	226900	227000	Transcribed gene body
chrIII	227000	228100	Transcribed gene body
chrIII	228100	230500	Low signal
chrIII	230500	231600	Heterochromatin
chrIII	231600	232700	Low signal
chrIII	232700	232900	H3K27me3 repressed
chrIII	232900	233500	Low signal
chrIII	233500	233600	Repressed enhancer
chrIII	233600	234600	Low signal
chrIII	234600	235100	Active enhancer
chrIII	235100	235400	TSS/Promoter
chrIII	235400	235900	TSS/Promoter
chrIII	235900	236300	TSS/Promoter
chrIII	236300	240100	Transcribed gene body
chrIII	240100	240300	Transcribed gene body
chrIII	240300	240500	Transcribed gene body
chrIII	240500	241100	Transcribed gene body
chrIII	241100	241900	Transcribed gene body
chrIII	241900	242200	Transcribed gene body
chrIII	242200	242300	Transcribed gene body
chrIII	242300	242500	Transcribed gene body
chrIII	242500	242600	Transcribed gene body
chrIII	242600	242700	Transcribed gene body
chrIII	242700	243700	Transcribed gene body
chrIII	243700	244000	Transcribed gene body
chrIII	244000	244100	Transcribed gene body
chrIII	244100	244300	Transcribed gene body
chrIII	244300	244500	Transcribed gene body
chrIII	244500	246200	Transcribed gene body
chrIII	246200	246400	Transcribed gene body
chrIII	246400	246800	Transcribed gene body
chrIII	246800	247000	Transcribed gene body
chrIII	247000	247100	Transcribed gene body
chrIII	247100	247300	Transcribed gene body
chrIII	247300	248500	Transcribed gene body
chrIII	248500	248900	Transcribed gene body
chrIII	248900	249100	Transcribed gene body
chrIII	249100	250300	Transcribed gene body
chrIII	250300	250500	Transcribed gene body
chrIII	250500	250600	Transcribed gene body
chrIII	250600	251100	Transcribed gene body
chrIII	251100	251400	Transcribed gene body
chrIII	251400	252100	Transcribed gene body
chrIII	252100	252200	Transcribed gene body
chrIII	252200	252500	Transcribed gene body
chrIII	252500	252600	Transcribed gene body
chrIII	252600	252800	Transcribed gene body
chrIII	252800	252900	Transcribed gene body
chrIII	252900	253000	Transcribed gene body
chrIII	253000	253900	Transcribed gene body
chrIII	253900	254100	Transcribed gene body
chrIII	254100	254400	Transcribed gene body
chrIII	254400	254600	Transcribed gene body
chrIII	254600	255400	Transcribed gene body
chrIII	255400	257200	Transcribed gene body
chrIII	257200	257500	Transcribed gene body
chrIII	257500	257800	Transcribed gene body
chrIII	257800	258300	Transcribed gene body
chrIII	258300	258500	Transcribed gene body
chrIII	258500	258900	Transcribed gene body
chrIII	258900	259300	Transcribed gene body
chrIII	259300	259900	Transcribed gene body
chrIII	259900	260300	Transcribed gene body
chrIII	260300	260800	Transcribed gene body
chrIII	260800	261100	Transcribed gene body
chrIII	261100	261600	Transcribed gene body
chrIII	261600	262100	Transcribed gene body
chrIII	262100	262200	Transcribed gene body
chrIII	262200	263100	Transcribed gene body
chrIII	263100	263500	Transcribed gene body
chrIII	263500	263700	Transcribed gene body
chrIII	263700	263800	Transcribed gene body
chrIII	263800	264100	Transcribed gene body
chrIII	264100	264300	Transcribed gene body
chrIII	264300	264600	Transcribed gene body
chrIII	264600	265100	Low signal
chrIII	265100	266300	Transcribed gene body
chrIII	266300	266400	Transcribed gene body
chrIII	266400	267000	Transcribed gene body
chrIII	267000	267200	Transcribed gene body
chrIII	267200	268500	Low signal
chrIII	268500	268800	Transcribed gene body
chrIII	268800	269000	Low signal
chrIII	269000	269500	Repressed enhancer
chrIII	269500	269700	Transcribed gene body
chrIII	269700	270600	Transcribed gene body
chrIII	270600	270700	Transcribed gene body
chrIII	270700	271000	Transcribed gene body
chrIII	271000	271100	Active enhancer
chrIII	271100	271700	Transcribed gene body
chrIII	271700	272000	Active enhancer
chrIII	272000	272700	Transcribed gene body
chrIII	272700	273200	Transcribed gene body
chrIII	273200	273700	Low signal
chrIII	273700	276500	Low signal
chrIII	276500	276600	Heterochromatin
chrIII	276600	276900	H3K27me3 repressed
chrIII	276900	277000	Heterochromatin
chrIII	277000	277800	Transcribed gene body
chrIII	277800	278900	Heterochromatin
chrIII	278900	279600	Transcribed gene body
chrIII	279600	279800	Heterochromatin
chrIII	279800	280100	H3K27me3 repressed
chrIII	280100	280200	Heterochromatin
chrIII	280200	280300	Low signal
chrIII	280300	280900	Transcribed gene body
chrIII	280900	281200	Low signal
chrIII	281200	281300	Heterochromatin
chrIII	281300	281600	H3K27me3 repressed
chrIII	281600	282700	Heterochromatin
chrIII	282700	282800	H3K27me3 repressed
chrIII	282800	283500	Heterochromatin
chrIII	283500	283800	H3K27me3 repressed
chrIII	283800	284100	Low signal
chrIII	284100	284900	Transcribed gene body
chrIII	284900	285200	Low signal
chrIII	285200	285300	Repressed enhancer
chrIII	285300	285400	Low signal
chrIII	285400	285600	H3K27me3 repressed
chrIII	285600	287200	Heterochromatin
chrIII	287200	287700	Transcribed gene body
chrIII	287700	288300	Low signal
chrIII	288300	288500	Transcribed gene body
chrIII	288500	289200	Low signal
chrIII	289200	289300	Active enhancer
chrIII	289300	289500	Low signal
chrIII	289500	289900	Repressed enhancer
chrIII	289900	292300	Low signal
chrIII	292300	292800	Transcribed gene body
chrIII	292800	293500	Low signal
chrIII	293500	294000	Heterochromatin
chrIII	294000	294200	Heterochromatin
chrIII	294200	296100	Heterochromatin
chrIII	296100	296200	H3K27me3 repressed
chrIII	296200	296400	Heterochromatin
chrIII	296400	296700	H3K27me3 repressed
chrIII	296700	297300	Heterochromatin
chrIII	297300	297700	H3K27me3 repressed
chrIII	297700	298300	Heterochromatin
chrIII	298300	298600	H3K27me3 repressed
chrIII	298600	298700	Heterochromatin
chrIII	298700	299000	H3K27me3 repressed
chrIII	299000	299800	Heterochromatin
chrIII	299800	300300	Heterochromatin
chrIII	300300	301300	Heterochromatin
chrIII	301300	301500	H3K27me3 repressed
chrIII	301500	302000	Low signal
chrIII	302000	302100	Repressed enhancer
chrIII	302100	302800	Low signal
chrIII	302800	302900	Repressed enhancer
chrIII	302900	303000	Low signal
chrIII	303000	303400	H3K27me3 repressed
chrIII	303400	304100	Heterochromatin
chrIII	304100	304300	Low signal
chrIII	304300	305000	Repressed enhancer
chrIII	305000	305100	Low signal
chrIII	305100	305200	Repressed enhancer
chrIII	305200	305300	Transcribed gene body
chrIII	305300	305700	Transcribed gene body
chrIII	305700	306700	Transcribed gene body
chrIII	306700	307100	Transcribed gene body
chrIII	307100	307500	Transcribed gene body
chrIII	307500	307900	Transcribed gene body
chrIII	307900	309000	Transcribed gene body
chrIII	309000	309600	Transcribed gene body
chrIII	309600	309900	Transcribed gene body
chrIII	309900	310100	Low signal
chrIII	310100	310300	Repressed enhancer
chrIII	310300	310700	Low signal
chrIII	310700	311000	Repressed enhancer
chrIII	311000	311200	Active enhancer
chrIII	311200	311600	Repressed enhancer
chrIII	311600	312000	Low signal
chrIII	312000	312200	Active enhancer
chrIII	312200	312800	Low signal
chrIII	312800	312900	Repressed enhancer
chrIII	312900	313000	Transcribed gene body
chrIII	313000	314000	Low signal
chrIII	314000	314200	H3K27me3 repressed
chrIII	314200	314700	Heterochromatin
chrIII	314700	315100	H3K27me3 repressed
chrIII	315100	315700	Heterochromatin
chrIII	315700	316000	H3K27me3 repressed
chrIII	316000	317400	Heterochromatin
chrIII	317400	317700	H3K27me3 repressed
chrIII	317700	319700	Low signal
chrIII	319700	320500	H3K27me3 repressed
chrIII	320500	321300	Low signal
chrIII	321300	321500	H3K27me3 repressed
chrIII	321500	321800	Heterochromatin
chrIII	321800	324100	Low signal
chrIII	324100	324300	H3K27me3 repressed
chrIII	324300	324800	Low signal
chrIII	324800	324900	Repressed enhancer
chrIII	324900	326300	Low signal
chrIII	326300	326500	H3K27me3 repressed
chrIII	326500	333100	Low signal
chrIII	333100	333500	H3K27me3 repressed
chrIII	333500	333700	Low signal
chrIII	333700	334100	Transcribed gene body
chrIII	334100	334200	Transcribed gene body
chrIII	334200	334600	Transcribed gene body
chrIII	334600	335100	Transcribed gene body
chrIII	335100	335400	Transcribed gene body
chrIII	335400	335500	Transcribed gene body
chrIII	335500	335900	Transcribed gene body
chrIII	335900	336300	Transcribed gene body
chrIII	336300	336600	Transcribed gene body
chrIII	336600	337000	Transcribed gene body
chrIII	337000	337700	Transcribed gene body
chrIII	337700	337900	Transcribed gene body
chrIII	337900	338300	Transcribed gene body
chrIII	338300	338500	Transcribed gene body
chrIII	338500	338900	Transcribed gene body
chrIII	338900	339200	Transcribed gene body
chrIII	339200	339500	Transcribed gene body
chrIII	339500	339700	Transcribed gene body
chrIII	339700	340000	Transcribed gene body
chrIII	340000	340100	Transcribed gene body
chrIII	340100	340300	Transcribed gene body
chrIII	340300	340600	Transcribed gene body
chrIII	340600	340700	Transcribed gene body
chrIII	340700	341300	Transcribed gene body
chrIII	341300	341900	Transcribed gene body
chrIII	341900	342400	Transcribed gene body
chrIII	342400	342900	Transcribed gene body
chrIII	342900	343000	Transcribed gene body
chrIII	343000	343400	Transcribed gene body
chrIII	343400	343500	TSS/Promoter
chrIII	343500	344200	TSS/Promoter
chrIII	344200	344900	Active enhancer
chrIII	344900	345100	Transcribed gene body
chrIII	345100	345400	Transcribed gene body
chrIII	345400	345800	Transcribed gene body
chrIII	345800	346000	Transcribed gene body
chrIII	346000	346200	Transcribed gene body
chrIII	346200	346300	Transcribed gene body
chrIII	346300	346900	Transcribed gene body
chrIII	346900	347100	Transcribed gene body
chrIII	347100	347500	Transcribed gene body
chrIII	347500	347900	Active enhancer
chrIII	347900	348000	TSS/Promoter
chrIII	348000	348400	TSS/Promoter
chrIII	348400	349700	TSS/Promoter
chrIII	349700	350200	Active enhancer
chrIII	350200	354100	Active enhancer
chrIII	354100	354700	TSS/Promoter
chrIII	354700	354900	TSS/Promoter
chrIII	354900	355100	Low signal
chrIII	355100	355200	Transcribed gene body
chrIII	355200	356100	TSS/Promoter
chrIII	356100	357100	Active enhancer
chrIII	357100	357300	Transcribed gene body
chrIII	357300	357600	Low signal
chrIII	357600	357700	Repressed enhancer
chrIII	357700	359600	Low signal
chrIII	359600	359700	Repressed enhancer
chrIII	359700	360000	Low signal
chrIII	360000	360100	Repressed enhancer
chrIII	360100	360500	Low signal
chrIII	360500	360600	Repressed enhancer
chrIII	360600	360700	Low signal
chrIII	360700	360800	Active enhancer
chrIII	360800	360900	Active enhancer
chrIII	360900	361100	Low signal
chrIII	361100	361700	Transcribed gene body
chrIII	361700	361800	Transcribed gene body
chrIII	361800	362100	Transcribed gene body
chrIII	362100	363200	Low signal
chrIII	363200	363400	Transcribed gene body
chrIII	363400	364000	Low signal
chrIII	364000	364100	Repressed enhancer
chrIII	364100	365000	Low signal
chrIII	365000	365200	Repressed enhancer
chrIII	365200	365300	Low signal
chrIII	365300	365400	Active enhancer
chrIII	365400	365500	Active enhancer
chrIII	365500	367400	Low signal
chrIII	367400	367700	Active enhancer
chrIII	367700	367800	Low signal
chrIII	367800	367900	H3K27me3 repressed
chrIII	367900	368500	Heterochromatin
chrIII	368500	369500	Heterochromatin
chrIII	369500	370600	Heterochromatin
chrIII	370600	370800	Heterochromatin
chrIII	370800	370900	Heterochromatin
chrIII	370900	371100	H3K27me3 repressed
chrIII	371100	371900	Heterochromatin
chrIII	371900	372100	H3K27me3 repressed
chrIII	372100	372300	Heterochromatin
chrIII	372300	373100	H3K27me3 repressed
chrIII	373100	374300	Heterochromatin
chrIII	374300	374700	Low signal
chrIII	374700	374800	Heterochromatin
chrIII	374800	375100	Low signal
chrIII	375100	375300	H3K27me3 repressed
chrIII	375300	375900	Low signal
chrIII	375900	376100	H3K27me3 repressed
chrIII	376100	376400	Low signal
chrIII	376400	376500	Repressed enhancer
chrIII	376500	377000	Low signal
chrIII	377000	377200	H3K27me3 repressed
chrIII	377200	378100	Low signal
chrIII	378100	378300	H3K27me3 repressed
chrIII	378300	379000	Low signal
chrIII	379000	379200	H3K27me3 repressed
chrIII	379200	379500	Low signal
chrIII	379500	379600	H3K27me3 repressed
chrIII	379600	381000	Low signal
chrIII	381000	381300	H3K27me3 repressed
chrIII	381300	381600	Low signal
chrIII	381600	381700	Low signal
chrIII	381700	381900	Transcribed gene body
chrIII	381900	382200	Active enhancer
chrIII	382200	382500	Low signal
chrIII	382500	382700	H3K27me3 repressed
chrIII	382700	383600	Low signal
chrIII	383600	386700	Heterochromatin
chrIII	386700	386900	Heterochromatin
chrIII	386900	388300	Heterochromatin
chrIII	388300	390900	Low signal
chrIII	390900	391400	Heterochromatin
chrIII	391400	391500	H3K27me3 repressed
chrIII	391500	391600	Heterochromatin
chrIII	391600	392100	Heterochromatin
chrIII	392100	392300	H3K27me3 repressed
chrIII	392300	393100	Heterochromatin
chrIII	393100	393300	H3K27me3 repressed
chrIII	393300	396400	Low signal
chrIII	396400	396600	H3K27me3 repressed
chrIII	396600	397900	Heterochromatin
chrIII	397900	398700	Heterochromatin
chrIII	398700	399500	Heterochromatin
chrIII	399500	399600	H3K27me3 repressed
chrIII	399600	404200	Heterochromatin
chrIII	404200	404300	H3K27me3 repressed
chrIII	404300	404800	Heterochromatin
chrIII	404800	404900	Heterochromatin
chrIII	404900	405000	Heterochromatin
chrIII	405000	405200	H3K27me3 repressed
chrIII	405200	406800	Low signal
chrIII	406800	407000	H3K27me3 repressed
chrIII	407000	408000	Heterochromatin
chrIII	408000	408400	Low signal
chrIII	408400	408600	Transcribed gene body
chrIII	408600	410800	Low signal
chrIII	410800	411200	Transcribed gene body
chrIII	411200	411300	Transcribed gene body
chrIII	411300	412100	Transcribed gene body
chrIII	412100	412200	Transcribed gene body
chrIII	412200	412300	Transcribed gene body
chrIII	412300	412800	Low signal
chrIII	412800	413100	Transcribed gene body
chrIII	413100	413700	Low signal
chrIII	413700	414400	Transcribed gene body
chrIII	414400	415300	Low signal
chrIII	415300	415500	H3K27me3 repressed
chrIII	415500	415600	Heterochromatin
chrIII	415600	415800	H3K27me3 repressed
chrIII	415800	416600	Low signal
chrIII	416600	416700	Transcribed gene body
chrIII	416700	416900	Low signal
chrIII	416900	417100	Transcribed gene body
chrIII	417100	418200	Transcribed gene body
chrIII	418200	419000	Transcribed gene body
chrIII	419000	419300	Transcribed gene body
chrIII	419300	419700	Transcribed gene body
chrIII	419700	419800	Transcribed gene body
chrIII	419800	420200	Transcribed gene body
chrIII	420200	421100	Transcribed gene body
chrIII	421100	421700	Transcribed gene body
chrIII	421700	421800	Transcribed gene body
chrIII	421800	421900	Transcribed gene body
chrIII	421900	422000	Transcribed gene body
chrIII	422000	422200	Transcribed gene body
chrIII	422200	422400	Active enhancer
chrIII	422400	422600	Transcribed gene body
chrIII	422600	423100	Active enhancer
chrIII	423100	423400	Transcribed gene body
chrIII	423400	423500	Active enhancer
chrIII	423500	424100	TSS/Promoter
chrIII	424100	424300	TSS/Promoter
chrIII	424300	424400	Active enhancer
chrIII	424400	425400	Low signal
chrIII	425400	426900	Low signal
chrIII	426900	427600	Low signal
chrIII	427600	427700	H3K27me3 repressed
chrIII	427700	428200	Low signal
chrIII	428200	428400	Transcribed gene body
chrIII	428400	428500	Repressed enhancer
chrIII	428500	428900	Transcribed gene body
chrIII	428900	429100	Transcribed gene body
chrIII	429100	429200	Transcribed gene body
chrIII	429200	429300	Transcribed gene body
chrIII	429300	430400	Transcribed gene body
chrIII	430400	430700	Transcribed gene body
chrIII	430700	432400	Transcribed gene body
chrIII	432400	432800	Transcribed gene body
chrIII	432800	432900	Transcribed gene body
chrIII	432900	433000	Transcribed gene body
chrIII	433000	433300	Transcribed gene body
chrIII	433300	434600	Active enhancer
chrIII	434600	435000	TSS/Promoter
chrIII	435000	435100	Active enhancer
chrIII	435100	435500	Transcribed gene body
chrIII	435500	440000	Transcribed gene body
chrIII	440000	440100	Transcribed gene body
chrIII	440100	440300	Low signal
chrIII	440300	442100	H3K27me3 repressed
chrIII	442100	443700	Heterochromatin
chrIII	443700	444300	Low signal
chrIII	444300	444400	H3K27me3 repressed
chrIII	444400	444700	Low signal
chrIII	444700	444900	H3K27me3 repressed
chrIII	444900	445900	Low signal
chrIII	445900	446000	H3K27me3 repressed
chrIII	446000	446200	Heterochromatin
chrIII	446200	448300	Low signal
chrIII	448300	448400	H3K27me3 repressed
chrIII	448400	449000	Low signal
chrIII	449000	449100	H3K27me3 repressed
chrIII	449100	449700	Low signal
chrIII	449700	449800	H3K27me3 repressed
chrIII	449800	452000	Low signal
chrIII	452000	452200	H3K27me3 repressed
chrIII	452200	452700	Low signal
chrIII	452700	452800	Repressed enhancer
chrIII	452800	453700	Low signal
chrIII	453700	453800	H3K27me3 repressed
chrIII	453800	454300	Low signal
chrIII	454300	454400	H3K27me3 repressed
chrIII	454400	455200	Low signal
chrIII	455200	456200	Heterochromatin
chrIII	456200	456400	Heterochromatin
chrIII	456400	456500	H3K27me3 repressed
chrIII	456500	457400	Low signal
chrIII	457400	457600	H3K27me3 repressed
chrIII	457600	457800	Low signal
chrIII	457800	457900	H3K27me3 repressed
chrIII	457900	458000	Low signal
chrIII	458000	458300	Active enhancer
chrIII	458300	458500	Low signal
chrIII	458500	458600	Active enhancer
chrIII	458600	458800	Low signal
chrIII	458800	458900	Repressed enhancer
chrIII	458900	460400	Low signal
chrIII	460400	460700	H3K27me3 repressed
chrIII	460700	461100	Low signal
chrIII	461100	462400	Active enhancer
chrIII	462400	462500	Active enhancer
chrIII	462500	463000	Transcribed gene body
chrIII	463000	463300	TSS/Promoter
chrIII	463300	463600	Transcribed gene body
chrIII	463600	463800	TSS/Promoter
chrIII	463800	464800	Low signal
chrIII	464800	465000	Transcribed gene body
chrIII	465000	465200	Transcribed gene body
chrIII	465200	465800	Transcribed gene body
chrIII	465800	466000	Transcribed gene body
chrIII	466000	466600	Transcribed gene body
chrIII	466600	466800	Active enhancer
chrIII	466800	467100	Transcribed gene body
chrIII	467100	467300	Transcribed gene body
chrIII	467300	467900	Low signal
chrIII	467900	468100	Transcribed gene body
chrIII	468100	468400	Transcribed gene body
chrIII	468400	468600	Transcribed gene body
chrIII	468600	468800	Transcribed gene body
chrIII	468800	469100	Transcribed gene body
chrIII	469100	469300	Transcribed gene body
chrIII	469300	469900	Transcribed gene body
chrIII	469900	470100	Transcribed gene body
chrIII	470100	470200	Transcribed gene body
chrIII	470200	470400	Transcribed gene body
chrIII	470400	470500	Transcribed gene body
chrIII	470500	470900	Transcribed gene body
chrIII	470900	471000	Transcribed gene body
chrIII	471000	471300	Transcribed gene body
chrIII	471300	471500	TSS/Promoter
chrIII	471500	471800	TSS/Promoter
chrIII	471800	472000	TSS/Promoter
chrIII	472000	472400	TSS/Promoter
chrIII	472400	472800	TSS/Promoter
chrIII	472800	474200	Transcribed gene body
chrIII	474200	474400	Transcribed gene body
chrIII	474400	475200	Transcribed gene body
chrIII	475200	475300	Transcribed gene body
chrIII	475300	475400	Transcribed gene body
chrIII	475400	475500	Transcribed gene body
chrIII	475500	475600	Transcribed gene body
chrIII	475600	476000	Transcribed gene body
chrIII	476000	476300	Transcribed gene body
chrIII	476300	476500	Transcribed gene body
chrIII	476500	477000	Transcribed gene body
chrIII	477000	477400	Transcribed gene body
chrIII	477400	477800	Transcribed gene body
chrIII	477800	478100	Transcribed gene body
chrIII	478100	478700	Transcribed gene body
chrIII	478700	479400	Transcribed gene body
chrIII	479400	479700	Transcribed gene body
chrIII	479700	480500	Transcribed gene body
chrIII	480500	480700	Transcribed gene body
chrIII	480700	481200	Low signal
chrIII	481200	482300	Transcribed gene body
chrIII	482300	482800	Low signal
chrIII	482800	482900	Repressed enhancer
chrIII	482900	483700	Low signal
chrIII	483700	483800	Repressed enhancer
chrIII	483800	484700	Low signal
chrIII	484700	484800	H3K27me3 repressed
chrIII	484800	485300	Low signal
chrIII	485300	485500	H3K27me3 repressed
chrIII	485500	486200	Low signal
chrIII	486200	486400	H3K27me3 repressed
chrIII	486400	488600	Low signal
chrIII	488600	488700	H3K27me3 repressed
chrIII	488700	489900	Low signal
chrIII	489900	490200	Repressed enhancer
chrIII	490200	490300	Low signal
chrIII	490300	490800	Active enhancer
chrIII	490800	490900	Active enhancer
chrIII	490900	491000	Active enhancer
chrIII	491000	491200	Active enhancer
chrIII	491200	491300	Active enhancer
chrIII	491300	491500	TSS/Promoter
chrIII	491500	491600	TSS/Promoter
chrIII	491600	491800	TSS/Promoter
chrIII	491800	492400	Transcribed gene body
chrIII	492400	492500	Active enhancer
chrIII	492500	493500	Transcribed gene body
chrIII	493500	493900	Transcribed gene body
chrIII	493900	494300	Transcribed gene body
chrIII	494300	495000	Transcribed gene body
chrIII	495000	495500	Transcribed gene body
chrIII	495500	495600	Transcribed gene body
chrIII	495600	495700	Transcribed gene body
chrIII	495700	495800	Transcribed gene body
chrIII	495800	496100	Transcribed gene body
chrIII	496100	496600	Transcribed gene body
chrIII	496600	497400	Transcribed gene body
chrIII	497400	498200	Transcribed gene body
chrIII	498200	498900	Transcribed gene body
chrIII	498900	499000	Transcribed gene body
chrIII	499000	499300	Transcribed gene body
chrIII	499300	499400	Transcribed gene body
chrIII	499400	499600	Transcribed gene body
chrIII	499600	499800	Transcribed gene body
chrIII	499800	500400	Low signal
chrIII	500400	500600	Transcribed gene body
chrIII	500600	500900	Transcribed gene body
chrIII	500900	501300	Transcribed gene body
chrIII	501300	501700	Transcribed gene body
chrIII	501700	502000	Transcribed gene body
chrIII	502000	502600	Repressed enhancer
chrIII	502600	502800	Low signal
chrIII	502800	503000	Repressed enhancer
chrIII	503000	504500	Low signal
chrIII	504500	504600	Repressed enhancer
chrIII	504600	505600	Low signal
chrIII	505600	509100	Heterochromatin
chrIII	509100	509900	H3K27me3 repressed
chrIII	509900	510700	Heterochromatin
chrIII	510700	511000	H3K27me3 repressed
chrIII	511000	513500	Heterochromatin
chrIII	513500	514000	Heterochromatin
chrIII	514000	514700	Heterochromatin
chrIII	514700	515800	Heterochromatin
chrIII	515800	515900	Heterochromatin
chrIII	515900	516100	Heterochromatin
chrIII	516100	516600	H3K27me3 repressed
chrIII	516600	517600	Low signal
chrIII	517600	517700	H3K27me3 repressed
chrIII	517700	518400	Low signal
chrIII	518400	518800	H3K27me3 repressed
chrIII	518800	519100	Low signal
chrIII	519100	520400	Heterochromatin
chrIII	520400	520500	Heterochromatin
chrIII	520500	520600	Heterochromatin
chrIII	520600	520700	Heterochromatin
chrIII	520700	520900	Heterochromatin
chrIII	520900	522400	Heterochromatin
chrIII	522400	524400	Heterochromatin
chrIII	524400	524600	H3K27me3 repressed
chrIII	524600	525400	Low signal
chrIII	525400	525600	H3K27me3 repressed
chrIII	525600	527100	Low signal
chrIII	527100	527300	H3K27me3 repressed
chrIII	527300	528800	Heterochromatin
chrIII	528800	531400	Low signal
chrIII	531400	531700	Repressed enhancer
chrIII	531700	533700	Low signal
chrIII	533700	533800	Repressed enhancer
chrIII	533800	534100	Low signal
chrIII	534100	535100	Repressed enhancer
chrIII	535100	535500	Low signal
chrIII	535500	535700	Repressed enhancer
chrIII	535700	536400	Transcribed gene body
chrIII	536400	538600	Low signal
chrIII	538600	538700	Repressed enhancer
chrIII	538700	539100	Low signal
chrIII	539100	539400	Repressed enhancer
chrIII	539400	542100	Low signal
chrIII	542100	542200	Transcribed gene body
chrIII	542200	543000	Low signal
chrIII	543000	543400	Transcribed gene body
chrIII	543400	545000	Low signal
chrIII	545000	545100	Repressed enhancer
chrIII	545100	545800	Low signal
chrIII	545800	546100	H3K27me3 repressed
chrIII	546100	547700	Low signal
chrIII	547700	547800	H3K27me3 repressed
chrIII	547800	548300	Low signal
chrIII	548300	548400	Repressed enhancer
chrIII	548400	548600	Low signal
chrIII	548600	549100	Repressed enhancer
chrIII	549100	549400	Low signal
chrIII	549400	549600	Repressed enhancer
chrIII	549600	549800	Low signal
chrIII	549800	549900	Repressed enhancer
chrIII	549900	550100	Low signal
chrIII	550100	550300	Repressed enhancer
chrIII	550300	550500	Low signal
chrIII	550500	550900	Repressed enhancer
chrIII	550900	551400	Low signal
chrIII	551400	551500	Repressed enhancer
chrIII	551500	552500	Low signal
chrIII	552500	552800	Repressed enhancer
chrIII	552800	553300	Low signal
chrIII	553300	553400	Repressed enhancer
chrIII	553400	553500	Low signal
chrIII	553500	554500	Low signal
chrIII	554500	556400	Low signal
chrIII	556400	556500	Repressed enhancer
chrIII	556500	556700	Low signal
chrIII	556700	556800	Repressed enhancer
chrIII	556800	557600	Low signal
chrIII	557600	557700	Repressed enhancer
chrIII	557700	557900	Low signal
chrIII	557900	558500	Repressed enhancer
chrIII	558500	558700	Active enhancer
chrIII	558700	558800	Low signal
chrIII	558800	559200	Repressed enhancer
chrIII	559200	559500	Active enhancer
chrIII	559500	560000	Transcribed gene body
chrIII	560000	560900	Active enhancer
chrIII	560900	562300	Transcribed gene body
chrIII	562300	562400	Transcribed gene body
chrIII	562400	562600	Transcribed gene body
chrIII	562600	562700	Transcribed gene body
chrIII	562700	562800	Transcribed gene body
chrIII	562800	562900	Transcribed gene body
chrIII	562900	563200	Transcribed gene body
chrIII	563200	564600	Active enhancer
chrIII	564600	564800	Transcribed gene body
chrIII	564800	565100	Transcribed gene body
chrIII	565100	565500	Active enhancer
chrIII	565500	566200	Transcribed gene body
chrIII	566200	566800	Transcribed gene body
chrIII	566800	567500	Transcribed gene body
chrIII	567500	568700	Transcribed gene body
chrIII	568700	569900	Transcribed gene body
chrIII	569900	570700	Transcribed gene body
chrIII	570700	571100	Transcribed gene body
chrIII	571100	571400	Transcribed gene body
chrIII	571400	571500	Active enhancer
chrIII	571500	571700	Transcribed gene body
chrIII	571700	571800	Transcribed gene body
chrIII	571800	572000	Transcribed gene body
chrIII	572000	572100	Transcribed gene body
chrIII	572100	573400	Transcribed gene body
chrIII	573400	573500	Transcribed gene body
chrIII	573500	573900	Transcribed gene body
chrIII	573900	574500	Transcribed gene body
chrIII	574500	574800	Transcribed gene body
chrIII	574800	575300	Transcribed gene body
chrIII	575300	575600	Transcribed gene body
chrIII	575600	575800	Transcribed gene body
chrIII	575800	576100	Transcribed gene body
chrIII	576100	576200	Transcribed gene body
chrIII	576200	576400	Transcribed gene body
chrIII	576400	576500	Transcribed gene body
chrIII	576500	576600	Transcribed gene body
chrIII	576600	577000	Low signal
chrIII	577000	578200	Transcribed gene body
chrIII	578200	579100	Low signal
chrIII	579100	579800	Transcribed gene body
chrIII	579800	579900	Transcribed gene body
chrIII	579900	580500	Transcribed gene body
chrIII	580500	580600	Transcribed gene body
chrIII	580600	580800	Transcribed gene body
chrIII	580800	581000	Transcribed gene body
chrIII	581000	582400	Transcribed gene body
chrIII	582400	582500	Transcribed gene body
chrIII	582500	582700	Low signal
chrIII	582700	583200	Repressed enhancer
chrIII	583200	583800	Low signal
chrIII	583800	584600	Transcribed gene body
chrIII	584600	584900	Transcribed gene body
chrIII	584900	585300	Transcribed gene body
chrIII	585300	586000	Transcribed gene body
chrIII	586000	586500	Transcribed gene body
chrIII	586500	586800	Low signal
chrIII	586800	587000	Transcribed gene body
chrIII	587000	587100	Transcribed gene body
chrIII	587100	587300	Transcribed gene body
chrIII	587300	587500	Transcribed gene body
chrIII	587500	587700	Transcribed gene body
chrIII	587700	587800	Transcribed gene body
chrIII	587800	588100	Transcribed gene body
chrIII	588100	588200	Transcribed gene body
chrIII	588200	588500	Transcribed gene body
chrIII	588500	590800	Low signal
chrIII	590800	590900	Transcribed gene body
chrIII	590900	591900	Transcribed gene body
chrIII	591900	592200	Transcribed gene body
chrIII	592200	592400	Transcribed gene body
chrIII	592400	593300	Transcribed gene body
chrIII	593300	593600	Transcribed gene body
chrIII	593600	593900	Transcribed gene body
chrIII	593900	594000	Transcribed gene body
chrIII	594000	594200	Transcribed gene body
chrIII	594200	594500	Transcribed gene body
chrIII	594500	595000	Transcribed gene body
chrIII	595000	595100	Transcribed gene body
chrIII	595100	595200	Transcribed gene body
chrIII	595200	595900	Transcribed gene body
chrIII	595900	596200	Transcribed gene body
chrIII	596200	596300	Transcribed gene body
chrIII	596300	596600	Transcribed gene body
chrIII	596600	596900	Transcribed gene body
chrIII	596900	597900	Active enhancer
chrIII	597900	598400	TSS/Promoter
chrIII	598400	599200	Active enhancer
chrIII	599200	599800	Transcribed gene body
chrIII	599800	600400	TSS/Promoter
chrIII	600400	600500	Active enhancer
chrIII	600500	603300	Low signal
chrIII	603300	603400	H3K27me3 repressed
chrIII	603400	604600	Low signal
chrIII	604600	604700	H3K27me3 repressed
chrIII	604700	605200	Low signal
chrIII	605200	605300	H3K27me3 repressed
chrIII	605300	606100	Low signal
chrIII	606100	606200	H3K27me3 repressed
chrIII	606200	607100	Low signal
chrIII	607100	607200	H3K27me3 repressed
chrIII	607200	611000	Low signal
chrIII	611000	611100	H3K27me3 repressed
chrIII	611100	611300	Low signal
chrIII	611300	612300	Low signal
chrIII	612300	612700	Active enhancer
chrIII	612700	613100	Low signal
chrIII	613100	613400	TSS/Promoter
chrIII	613400	613500	Active enhancer
chrIII	613500	613700	Low signal
chrIII	613700	613800	TSS/Promoter
chrIII	613800	613900	TSS/Promoter
chrIII	613900	614500	TSS/Promoter
chrIII	614500	614600	TSS/Promoter
chrIII	614600	614700	TSS/Promoter
chrIII	614700	614800	Active enhancer
chrIII	614800	615200	Repressed enhancer
chrIII	615200	616600	Low signal
chrIII	616600	616800	TSS/Promoter
chrIII	616800	617200	Active enhancer
chrIII	617200	618100	Low signal
chrIII	618100	618300	Transcribed gene body
chrIII	618300	618700	Transcribed gene body
chrIII	618700	619700	Transcribed gene body
chrIII	619700	620100	Transcribed gene body
chrIII	620100	621300	Active enhancer
chrIII	621300	622700	Transcribed gene body
chrIII	622700	624200	Active enhancer
chrIII	624200	624300	Active enhancer
chrIII	624300	624500	Active enhancer
chrIII	624500	624900	Repressed enhancer
chrIII	624900	626200	Low signal
chrIII	626200	626300	H3K27me3 repressed
chrIII	626300	626800	Low signal
chrIII	626800	626900	H3K27me3 repressed
chrIII	626900	627600	Low signal
chrIII	627600	627700	H3K27me3 repressed
chrIII	627700	628400	Low signal
chrIII	628400	629000	Low signal
chrIII	629000	629200	Repressed enhancer
chrIII	629200	629400	Low signal
chrIII	629400	629500	Repressed enhancer
chrIII	629500	630300	Low signal
chrIII	630300	630500	Repressed enhancer
chrIII	630500	632000	Low signal
chrIII	632000	632100	Transcribed gene body
chrIII	632100	632600	Transcribed gene body
chrIII	632600	632800	Transcribed gene body
chrIII	632800	634100	Transcribed gene body
chrIII	634100	634300	Transcribed gene body
chrIII	634300	634500	TSS/Promoter
chrIII	634500	634700	TSS/Promoter
chrIII	634700	634900	TSS/Promoter
chrIII	634900	635200	TSS/Promoter
chrIII	635200	635300	Active enhancer
chrIII	635300	635800	Transcribed gene body
chrIII	635800	636000	Transcribed gene body
chrIII	636000	636100	Transcribed gene body
chrIII	636100	636200	Transcribed gene body
chrIII	636200	636500	Transcribed gene body
chrIII	636500	636800	Transcribed gene body
chrIII	636800	637100	Transcribed gene body
chrIII	637100	637200	Transcribed gene body
chrIII	637200	637600	Transcribed gene body
chrIII	637600	638000	Transcribed gene body
chrIII	638000	638300	Transcribed gene body
chrIII	638300	638400	Transcribed gene body
chrIII	638400	638500	Transcribed gene body
chrIII	638500	638700	Transcribed gene body
chrIII	638700	639000	Transcribed gene body
chrIII	639000	640000	Transcribed gene body
chrIII	640000	640200	TSS/Promoter
chrIII	640200	640400	TSS/Promoter
chrIII	640400	640600	TSS/Promoter
chrIII	640600	640900	TSS/Promoter
chrIII	640900	641300	TSS/Promoter
chrIII	641300	641800	Transcribed gene body
chrIII	641800	644600	Transcribed gene body
chrIII	644600	644700	Transcribed gene body
chrIII	644700	645500	Transcribed gene body
chrIII	645500	645600	Transcribed gene body
chrIII	645600	646000	Transcribed gene body
chrIII	646000	646100	Transcribed gene body
chrIII	646100	647800	Active enhancer
chrIII	647800	648900	Transcribed gene body
chrIII	648900	650400	Transcribed gene body
chrIII	650400	650500	Transcribed gene body
chrIII	650500	651200	Transcribed gene body
chrIII	651200	651300	Transcribed gene body
chrIII	651300	651600	Transcribed gene body
chrIII	651600	651900	Transcribed gene body
chrIII	651900	652300	Transcribed gene body
chrIII	652300	652400	Transcribed gene body
chrIII	652400	652900	Transcribed gene body
chrIII	652900	653000	Transcribed gene body
chrIII	653000	653300	Transcribed gene body
chrIII	653300	653800	Transcribed gene body
chrIII	653800	654300	Transcribed gene body
chrIII	654300	654400	Low signal
chrIII	654400	654800	Repressed enhancer
chrIII	654800	654900	Active enhancer
chrIII	654900	655000	Low signal
chrIII	655000	655100	Active enhancer
chrIII	655100	655200	Low signal
chrIII	655200	655300	Repressed enhancer
chrIII	655300	655600	Low signal
chrIII	655600	655700	Repressed enhancer
chrIII	655700	655800	Low signal
chrIII	655800	656200	Repressed enhancer
chrIII	656200	657100	Low signal
chrIII	657100	657200	Active enhancer
chrIII	657200	657300	Active enhancer
chrIII	657300	657800	Active enhancer
chrIII	657800	657900	Active enhancer
chrIII	657900	658100	Transcribed gene body
chrIII	658100	658200	Transcribed gene body
chrIII	658200	659500	Low signal
chrIII	659500	660900	Transcribed gene body
chrIII	660900	663600	Low signal
chrIII	663600	667500	Low signal
chrIII	667500	667900	Low signal
chrIII	667900	668100	Active enhancer
chrIII	668100	668400	Active enhancer
chrIII	668400	669200	Active enhancer
chrIII	669200	669800	Active enhancer
chrIII	669800	670100	Active enhancer
chrIII	670100	670800	Active enhancer
chrIII	670800	671100	Active enhancer
chrIII	671100	671300	Low signal
chrIII	671300	671400	Active enhancer
chrIII	671400	671700	TSS/Promoter
chrIII	671700	671800	TSS/Promoter
chrIII	671800	672200	TSS/Promoter
chrIII	672200	672300	TSS/Promoter
chrIII	672300	672700	Transcribed gene body
chrIII	672700	672900	Transcribed gene body
chrIII	672900	673200	Transcribed gene body
chrIII	673200	673500	Transcribed gene body
chrIII	673500	673800	Transcribed gene body
chrIII	673800	674000	Active enhancer
chrIII	674000	674800	Transcribed gene body
chrIII	674800	675400	Active enhancer
chrIII	675400	675500	Transcribed gene body
chrIII	675500	676100	Transcribed gene body
chrIII	676100	676200	Transcribed gene body
chrIII	676200	676700	Transcribed gene body
chrIII	676700	677000	Transcribed gene body
chrIII	677000	677200	Transcribed gene body
chrIII	677200	678400	Transcribed gene body
chrIII	678400	678500	Transcribed gene body
chrIII	678500	679300	Transcribed gene body
chrIII	679300	680300	Transcribed gene body
chrIII	680300	680700	Low signal
chrIII	680700	680800	H3K27me3 repressed
chrIII	680800	685400	Low signal
chrIII	685400	685500	H3K27me3 repressed
chrIII	685500	685800	Low signal
chrIII	685800	685900	H3K27me3 repressed
chrIII	685900	686700	Low signal
chrIII	686700	686800	H3K27me3 repressed
chrIII	686800	687300	Low signal
chrIII	687300	687500	H3K27me3 repressed
chrIII	687500	688400	Low signal
chrIII	688400	688600	Repressed enhancer
chrIII	688600	688700	Low signal
chrIII	688700	689800	Low signal
chrIII	689800	689900	Heterochromatin
chrIII	689900	690200	Heterochromatin
chrIII	690200	690400	Heterochromatin
chrIII	690400	690700	Heterochromatin
chrIII	690700	692600	Heterochromatin
chrIII	692600	693100	H3K27me3 repressed
chrIII	693100	694000	Heterochromatin
chrIII	694000	695100	Transcribed gene body
chrIII	695100	695300	Transcribed gene body
chrIII	695300	695500	Transcribed gene body
chrIII	695500	695600	Transcribed gene body
chrIII	695600	695700	Transcribed gene body
chrIII	695700	696700	Low signal
chrIII	696700	697000	Repressed enhancer
chrIII	697000	698100	Low signal
chrIII	698100	698200	H3K27me3 repressed
chrIII	698200	701400	Heterochromatin
chrIII	701400	701500	H3K27me3 repressed
chrIII	701500	702100	Low signal
chrIII	702100	702200	H3K27me3 repressed
chrIII	702200	703100	Low signal
chrIII	703100	703200	Repressed enhancer
chrIII	703200	705000	Low signal
chrIII	705000	706100	Heterochromatin
chrIII	706100	706200	H3K27me3 repressed
chrIII	706200	706300	Repressed enhancer
chrIII	706300	706400	Low signal
chrIII	706400	708500	Low signal
chrIII	708500	708700	H3K27me3 repressed
chrIII	708700	709100	Low signal
chrIII	709100	709200	H3K27me3 repressed
chrIII	709200	710500	Low signal
chrIII	710500	710700	H3K27me3 repressed
chrIII	710700	711200	Low signal
chrIII	711200	711400	H3K27me3 repressed
chrIII	711400	712600	Heterochromatin
chrIII	712600	712700	H3K27me3 repressed
chrIII	712700	713100	Low signal
chrIII	713100	713200	H3K27me3 repressed
chrIII	713200	714200	Low signal
chrIII	714200	714400	H3K27me3 repressed
chrIII	714400	718800	Low signal
chrIII	718800	718900	H3K27me3 repressed
chrIII	718900	723500	Low signal
chrIII	723500	723600	H3K27me3 repressed
chrIII	723600	724000	Low signal
chrIII	724000	724100	H3K27me3 repressed
chrIII	724100	724300	Low signal
chrIII	724300	724500	H3K27me3 repressed
chrIII	724500	725400	Low signal
chrIII	725400	725500	H3K27me3 repressed
chrIII	725500	726000	Low signal
chrIII	726000	726100	H3K27me3 repressed
chrIII	726100	727100	Low signal
chrIII	727100	727300	Repressed enhancer
chrIII	727300	727500	Low signal
chrIII	727500	727600	Repressed enhancer
chrIII	727600	728200	Low signal
chrIII	728200	728400	H3K27me3 repressed
chrIII	728400	730100	Low signal
chrIII	730100	730500	Transcribed gene body
chrIII	730500	732500	Low signal
chrIII	732500	732600	Transcribed gene body
chrIII	732600	732900	Transcribed gene body
chrIII	732900	733100	Transcribed gene body
chrIII	733100	733500	Low signal
chrIII	733500	733800	H3K27me3 repressed
chrIII	733800	734000	Transcribed gene body
chrIII	734000	734500	Heterochromatin
chrIII	734500	735900	Transcribed gene body
chrIII	735900	736200	Transcribed gene body
chrIII	736200	736900	Low signal
chrIII	736900	739200	Transcribed gene body
chrIII	739200	740700	Low signal
chrIII	740700	740900	H3K27me3 repressed
chrIII	740900	741200	Low signal
chrIII	741200	742200	H3K27me3 repressed
chrIII	742200	742300	Low signal
chrIII	742300	742400	Transcribed gene body
chrIII	742400	742500	Transcribed gene body
chrIII	742500	742800	Transcribed gene body
chrIII	742800	744400	Transcribed gene body
chrIII	744400	744600	Transcribed gene body
chrIII	744600	745100	Transcribed gene body
chrIII	745100	747200	Low signal
chrIII	747200	747300	Repressed enhancer
chrIII	747300	747600	Low signal
chrIII	747600	747700	Transcribed gene body
chrIII	747700	748400	Low signal
chrIII	748400	748500	Repressed enhancer
chrIII	748500	748900	Low signal
chrIII	748900	749200	Repressed enhancer
chrIII	749200	749600	Low signal
chrIII	749600	749700	Active enhancer
chrIII	749700	749800	Active enhancer
chrIII	749800	749900	Active enhancer
chrIII	749900	750400	Low signal
chrIII	750400	750500	Repressed enhancer
chrIII	750500	752600	Low signal
chrIII	752600	753000	Repressed enhancer
chrIII	753000	753400	Low signal
chrIII	753400	753500	H3K27me3 repressed
chrIII	753500	754300	Low signal
chrIII	754300	754700	Low signal
chrIII	754700	754900	Repressed enhancer
chrIII	754900	755400	Low signal
chrIII	755400	759600	Low signal
chrIII	759600	759700	Repressed enhancer
chrIII	759700	760000	Low signal
chrIII	760000	760100	H3K27me3 repressed
chrIII	760100	763100	Low signal
chrIII	763100	763300	Repressed enhancer
chrIII	763300	763800	Low signal
chrIII	763800	763900	Repressed enhancer
chrIII	763900	764000	Low signal
chrIII	764000	764200	Active enhancer
chrIII	764200	764400	Active enhancer
chrIII	764400	764700	Repressed enhancer
chrIII	764700	765100	Active enhancer
chrIII	765100	765200	TSS/Promoter
chrIII	765200	765500	Active enhancer
chrIII	765500	765700	Active enhancer
chrIII	765700	765800	Repressed enhancer
chrIII	765800	766000	Low signal
chrIII	766000	766100	Repressed enhancer
chrIII	766100	766500	Active enhancer
chrIII	766500	766700	Active enhancer
chrIII	766700	768300	Active enhancer
chrIII	768300	768400	Transcribed gene body
chrIII	768400	768600	Transcribed gene body
chrIII	768600	769300	Transcribed gene body
chrIII	769300	772300	Low signal
chrIII	772300	772400	Repressed enhancer
chrIII	772400	772600	Low signal
chrIII	772600	772700	Repressed enhancer
chrIII	772700	772900	Low signal
chrIII	772900	773100	TSS/Promoter
chrIII	773100	773300	Active enhancer
chrIII	773300	773400	Transcribed gene body
chrIII	773400	773500	TSS/Promoter
chrIII	773500	774000	TSS/Promoter
chrIII	774000	776100	Transcribed gene body
chrIII	776100	776200	Transcribed gene body
chrIII	776200	776500	Transcribed gene body
chrIII	776500	776600	Transcribed gene body
chrIII	776600	777000	Transcribed gene body
chrIII	777000	777800	Transcribed gene body
chrIII	777800	778000	Transcribed gene body
chrIII	778000	778100	TSS/Promoter
chrIII	778100	778700	Transcribed gene body
chrIII	778700	779200	Transcribed gene body
chrIII	779200	779500	Transcribed gene body
chrIII	779500	780100	Transcribed gene body
chrIII	780100	780400	Transcribed gene body
chrIII	780400	781000	Transcribed gene body
chrIII	781000	781400	Transcribed gene body
chrIII	781400	781900	Transcribed gene body
chrIII	781900	782300	Transcribed gene body
chrIII	782300	782800	Transcribed gene body
chrIII	782800	783100	TSS/Promoter
chrIII	783100	783400	TSS/Promoter
chrIII	783400	783600	TSS/Promoter
chrIII	783600	783900	TSS/Promoter
chrIII	783900	784300	TSS/Promoter
chrIII	784300	785700	Transcribed gene body
chrIII	785700	786000	Transcribed gene body
chrIII	786000	786700	Low signal
chrIII	786700	786800	Repressed enhancer
chrIII	786800	787900	Low signal
chrIII	787900	788000	Repressed enhancer
chrIII	788000	788200	Low signal
chrIII	788200	788500	Active enhancer
chrIII	788500	791600	Low signal
chrIII	791600	791700	Transcribed gene body
chrIII	791700	791900	Transcribed gene body
chrIII	791900	793300	Active enhancer
chrIII	793300	793500	TSS/Promoter
chrIII	793500	793700	TSS/Promoter
chrIII	793700	794200	TSS/Promoter
chrIII	794200	795900	TSS/Promoter
chrIII	795900	796000	Active enhancer
chrIII	796000	796100	Transcribed gene body
chrIII	796100	796200	Transcribed gene body
chrIII	796200	796300	Transcribed gene body
chrIII	796300	796500	Transcribed gene body
chrIII	796500	796900	Transcribed gene body
chrIII	796900	797200	Transcribed gene body
chrIII	797200	799000	Transcribed gene body
chrIII	799000	799400	Transcribed gene body
chrIII	799400	799500	Transcribed gene body
chrIII	799500	799600	Transcribed gene body
chrIII	799600	799800	Transcribed gene body
chrIII	799800	800600	Transcribed gene body
chrIII	800600	800900	Transcribed gene body
chrIII	800900	801400	Transcribed gene body
chrIII	801400	801800	Transcribed gene body
chrIII	801800	802000	Transcribed gene body
chrIII	802000	802300	Transcribed gene body
chrIII	802300	802900	Transcribed gene body
chrIII	802900	803000	Transcribed gene body
chrIII	803000	803400	Transcribed gene body
chrIII	803400	806900	Low signal
chrIII	806900	807000	Repressed enhancer
chrIII	807000	807100	Low signal
chrIII	807100	807200	Repressed enhancer
chrIII	807200	807400	Low signal
chrIII	807400	807600	Transcribed gene body
chrIII	807600	807900	Transcribed gene body
chrIII	807900	808000	Transcribed gene body
chrIII	808000	808100	Transcribed gene body
chrIII	808100	808200	Low signal
chrIII	808200	808400	H3K27me3 repressed
chrIII	808400	810400	Low signal
chrIII	810400	810600	Low signal
chrIII	810600	811600	Low signal
chrIII	811600	812800	Heterochromatin
chrIII	812800	813000	H3K27me3 repressed
chrIII	813000	813200	Heterochromatin
chrIII	813200	813500	Low signal
chrIII	813500	813600	H3K27me3 repressed
chrIII	813600	815200	Low signal
chrIII	815200	815300	H3K27me3 repressed
chrIII	815300	816800	Low signal
chrIII	816800	816900	H3K27me3 repressed
chrIII	816900	817700	Low signal
chrIII	817700	817800	H3K27me3 repressed
chrIII	817800	819400	Low signal
chrIII	819400	819600	H3K27me3 repressed
chrIII	819600	820100	Low signal
chrIII	820100	820200	H3K27me3 repressed
chrIII	820200	822700	Low signal
chrIII	822700	822800	H3K27me3 repressed
chrIII	822800	826200	Low signal
chrIII	826200	826300	H3K27me3 repressed
chrIII	826300	826800	Low signal
chrIII	826800	826900	H3K27me3 repressed
chrIII	826900	828100	Low signal
chrIII	828100	828500	Repressed enhancer
chrIII	828500	828900	Low signal
chrIII	828900	829200	Transcribed gene body
chrIII	829200	830700	Low signal
chrIII	830700	830800	Repressed enhancer
chrIII	830800	831000	Transcribed gene body
chrIII	831000	831700	Low signal
chrIII	831700	831800	Active enhancer
chrIII	831800	831900	Active enhancer
chrIII	831900	832000	Active enhancer
chrIII	832000	832300	Active enhancer
chrIII	832300	832400	Active enhancer
chrIII	832400	832500	Active enhancer
chrIII	832500	832600	Active enhancer
chrIII	832600	833800	Active enhancer
chrIII	833800	834000	TSS/Promoter
chrIII	834000	834200	TSS/Promoter
chrIII	834200	834300	TSS/Promoter
chrIII	834300	834900	TSS/Promoter
chrIII	834900	835600	Transcribed gene body
chrIII	835600	835800	Low signal
chrIII	835800	836200	TSS/Promoter
chrIII	836200	836500	Low signal
chrIII	836500	840300	Low signal
chrIII	840300	841000	Low signal
chrIII	841000	841800	Active enhancer
chrIII	841800	843500	Low signal
chrIII	843500	843700	Repressed enhancer
chrIII	843700	843800	Low signal
chrIII	843800	844300	Active enhancer
chrIII	844300	845600	Active enhancer
chrIII	845600	846100	TSS/Promoter
chrIII	846100	846400	TSS/Promoter
chrIII	846400	846700	Transcribed gene body
chrIII	846700	846900	Transcribed gene body
chrIII	846900	847700	Transcribed gene body
chrIII	847700	848000	Transcribed gene body
chrIII	848000	848500	Transcribed gene body
chrIII	848500	848700	Transcribed gene body
chrIII	848700	850500	Transcribed gene body
chrIII	850500	850800	Transcribed gene body
chrIII	850800	851000	Transcribed gene body
chrIII	851000	851300	Transcribed gene body
chrIII	851300	851800	Transcribed gene body
chrIII	851800	852100	Transcribed gene body
chrIII	852100	852400	Transcribed gene body
chrIII	852400	852800	Transcribed gene body
chrIII	852800	852900	Transcribed gene body
chrIII	852900	853000	Transcribed gene body
chrIII	853000	853800	Transcribed gene body
chrIII	853800	853900	TSS/Promoter
chrIII	853900	854100	TSS/Promoter
chrIII	854100	854300	TSS/Promoter
chrIII	854300	854400	TSS/Promoter
chrIII	854400	854500	TSS/Promoter
chrIII	854500	854700	Transcribed gene body
chrIII	854700	855500	Transcribed gene body
chrIII	855500	855900	Transcribed gene body
chrIII	855900	856500	Transcribed gene body
chrIII	856500	856600	Transcribed gene body
chrIII	856600	857600	Transcribed gene body
chrIII	857600	857900	Transcribed gene body
chrIII	857900	858400	Transcribed gene body
chrIII	858400	858500	Transcribed gene body
chrIII	858500	858600	Transcribed gene body
chrIII	858600	858800	Transcribed gene body
chrIII	858800	859000	Transcribed gene body
chrIII	859000	859300	Transcribed gene body
chrIII	859300	860500	Transcribed gene body
chrIII	860500	860600	Transcribed gene body
chrIII	860600	861100	Transcribed gene body
chrIII	861100	861200	Transcribed gene body
chrIII	861200	861800	Low signal
chrIII	861800	861900	Active enhancer
chrIII	861900	862400	TSS/Promoter
chrIII	862400	862500	Transcribed gene body
chrIII	862500	862600	Transcribed gene body
chrIII	862600	863000	Transcribed gene body
chrIII	863000	863100	Transcribed gene body
chrIII	863100	863600	Transcribed gene body
chrIII	863600	863700	Transcribed gene body
chrIII	863700	863900	Transcribed gene body
chrIII	863900	864100	Active enhancer
chrIII	864100	864200	Transcribed gene body
chrIII	864200	864700	Low signal
chrIII	864700	864800	Transcribed gene body
chrIII	864800	864900	Transcribed gene body
chrIII	864900	865000	Transcribed gene body
chrIII	865000	865600	Transcribed gene body
chrIII	865600	866500	Low signal
chrIII	866500	866600	Repressed enhancer
chrIII	866600	866800	Low signal
chrIII	866800	866900	Transcribed gene body
chrIII	866900	869200	Transcribed gene body
chrIII	869200	869300	Transcribed gene body
chrIII	869300	869900	Low signal
chrIII	869900	870300	Repressed enhancer
chrIII	870300	870500	Low signal
chrIII	870500	870800	Repressed enhancer
chrIII	870800	875600	Low signal
chrIII	875600	875900	Heterochromatin
chrIII	875900	876200	H3K27me3 repressed
chrIII	876200	876300	Repressed enhancer
chrIII	876300	876400	Low signal
chrIII	876400	876600	Repressed enhancer
chrIII	876600	876800	H3K27me3 repressed
chrIII	876800	877800	Low signal
chrIII	877800	877900	Repressed enhancer
chrIII	877900	878700	Low signal
chrIII	878700	879100	Transcribed gene body
chrIII	879100	879800	Low signal
chrIII	879800	879900	Active enhancer
chrIII	879900	880000	Low signal
chrIII	880000	880200	TSS/Promoter
chrIII	880200	880300	Active enhancer
chrIII	880300	880800	Low signal
chrIII	880800	880900	Transcribed gene body
chrIII	880900	881400	Transcribed gene body
chrIII	881400	881800	Transcribed gene body
chrIII	881800	882400	Transcribed gene body
chrIII	882400	882700	Transcribed gene body
chrIII	882700	883000	Transcribed gene body
chrIII	883000	883200	Transcribed gene body
chrIII	883200	883300	Active enhancer
chrIII	883300	883500	Transcribed gene body
chrIII	883500	885600	Transcribed gene body
chrIII	885600	885800	Transcribed gene body
chrIII	885800	885900	Transcribed gene body
chrIII	885900	886200	Transcribed gene body
chrIII	886200	886300	Transcribed gene body
chrIII	886300	886600	TSS/Promoter
chrIII	886600	888700	TSS/Promoter
chrIII	888700	889400	Active enhancer
chrIII	889400	889800	Active enhancer
chrIII	889800	889900	Active enhancer
chrIII	889900	890000	Repressed enhancer
chrIII	890000	891100	Low signal
chrIII	891100	891400	Transcribed gene body
chrIII	891400	892000	Transcribed gene body
chrIII	892000	892400	Transcribed gene body
chrIII	892400	894900	Transcribed gene body
chrIII	894900	895400	Transcribed gene body
chrIII	895400	895600	TSS/Promoter
chrIII	895600	895800	TSS/Promoter
chrIII	895800	896000	TSS/Promoter
chrIII	896000	896100	TSS/Promoter
chrIII	896100	896500	Transcribed gene body
chrIII	896500	897900	Transcribed gene body
chrIII	897900	898300	Transcribed gene body
chrIII	898300	899700	Transcribed gene body
chrIII	899700	900300	Transcribed gene body
chrIII	900300	900500	Transcribed gene body
chrIII	900500	901000	Transcribed gene body
chrIII	901000	901100	Transcribed gene body
chrIII	901100	901300	Transcribed gene body
chrIII	901300	901400	TSS/Promoter
chrIII	901400	901500	TSS/Promoter
chrIII	901500	901700	TSS/Promoter
chrIII	901700	902000	TSS/Promoter
chrIII	902000	902100	TSS/Promoter
chrIII	902100	902400	Low signal
chrIII	902400	902500	Repressed enhancer
chrIII	902500	902600	Transcribed gene body
chrIII	902600	903200	Transcribed gene body
chrIII	903200	903300	Transcribed gene body
chrIII	903300	903400	Transcribed gene body
chrIII	903400	903700	Transcribed gene body
chrIII	903700	907200	Transcribed gene body
chrIII	907200	907400	Transcribed gene body
chrIII	907400	907800	Transcribed gene body
chrIII	907800	908500	Transcribed gene body
chrIII	908500	908600	Transcribed gene body
chrIII	908600	908900	Transcribed gene body
chrIII	908900	909000	Transcribed gene body
chrIII	909000	909200	Transcribed gene body
chrIII	909200	909600	Transcribed gene body
chrIII	909600	910200	Transcribed gene body
chrIII	910200	910600	TSS/Promoter
chrIII	910600	910700	TSS/Promoter
chrIII	910700	910800	TSS/Promoter
chrIII	910800	910900	TSS/Promoter
chrIII	910900	911100	TSS/Promoter
chrIII	911100	911300	TSS/Promoter
chrIII	911300	911600	TSS/Promoter
chrIII	911600	912100	Transcribed gene body
chrIII	912100	912200	Transcribed gene body
chrIII	912200	915900	Low signal
chrIII	915900	916000	H3K27me3 repressed
chrIII	916000	916400	Low signal
chrIII	916400	916600	H3K27me3 repressed
chrIII	916600	917800	Low signal
chrIII	917800	918100	Heterochromatin
chrIII	918100	920200	Low signal
chrIII	920200	920300	H3K27me3 repressed
chrIII	920300	920600	Low signal
chrIII	920600	920700	H3K27me3 repressed
chrIII	920700	922100	Low signal
chrIII	922100	922200	H3K27me3 repressed
chrIII	922200	922500	Low signal
chrIII	922500	922800	H3K27me3 repressed
chrIII	922800	924300	Low signal
chrIII	924300	924400	H3K27me3 repressed
chrIII	924400	925000	Low signal
chrIII	925000	925100	H3K27me3 repressed
chrIII	925100	928000	Low signal
chrIII	928000	928100	H3K27me3 repressed
chrIII	928100	928600	Low signal
chrIII	928600	928700	H3K27me3 repressed
chrIII	928700	931100	Low signal
chrIII	931100	931300	H3K27me3 repressed
chrIII	931300	931400	Low signal
chrIII	931400	931800	H3K27me3 repressed
chrIII	931800	932700	Heterochromatin
chrIII	932700	933500	Low signal
chrIII	933500	934400	Heterochromatin
chrIII	934400	935900	Low signal
chrIII	935900	936100	H3K27me3 repressed
chrIII	936100	936600	Heterochromatin
chrIII	936600	937700	Low signal
chrIII	937700	938600	Heterochromatin
chrIII	938600	938900	Heterochromatin
chrIII	938900	939200	Heterochromatin
chrIII	939200	939300	Low signal
chrIII	939300	939400	H3K27me3 repressed
chrIII	939400	941200	Low signal
chrIII	941200	942000	Heterochromatin
chrIII	942000	942900	Heterochromatin
chrIII	942900	943300	Heterochromatin
chrIII	943300	943500	H3K27me3 repressed
chrIII	943500	943800	Heterochromatin
chrIII	943800	944400	Low signal
chrIII	944400	944600	H3K27me3 repressed
chrIII	944600	945200	Low signal
chrIII	945200	948300	Heterochromatin
chrIII	948300	949100	Low signal
chrIII	949100	950200	Transcribed gene body
chrIII	950200	950300	Low signal
chrIII	950300	950800	TSS/Promoter
chrIII	950800	951100	TSS/Promoter
chrIII	951100	951200	TSS/Promoter
chrIII	951200	951300	Low signal
chrIII	951300	951400	Transcribed gene body
chrIII	951400	951500	Transcribed gene body
chrIII	951500	951700	Transcribed gene body
chrIII	951700	952000	Repressed enhancer
chrIII	952000	952100	Low signal
chrIII	952100	952200	Repressed enhancer
chrIII	952200	952700	TSS/Promoter
chrIII	952700	952900	TSS/Promoter
chrIII	952900	954000	Transcribed gene body
chrIII	954000	955100	Low signal
chrIII	955100	955200	H3K27me3 repressed
chrIII	955200	955700	Low signal
chrIII	955700	955800	H3K27me3 repressed
chrIII	955800	958200	Low signal
chrIII	958200	958400	H3K27me3 repressed
chrIII	958400	959100	Low signal
chrIII	959100	959200	H3K27me3 repressed
chrIII	959200	959300	Low signal
chrIII	959300	959400	H3K27me3 repressed
chrIII	959400	959700	Low signal
chrIII	959700	959800	H3K27me3 repressed
chrIII	959800	961400	Low signal
chrIII	961400	963900	Heterochromatin
chrIII	963900	964400	Heterochromatin
chrIII	964400	964700	Heterochromatin
chrIII	964700	965900	Heterochromatin
chrIII	965900	966900	Heterochromatin
chrIII	966900	967700	Heterochromatin
chrIII	967700	968100	Heterochromatin
chrIII	968100	968200	Heterochromatin
chrIII	968200	970100	Heterochromatin
chrIII	970100	971100	Heterochromatin
chrIII	971100	973000	Heterochromatin
chrIII	973000	973400	Heterochromatin
chrIII	973400	974600	Heterochromatin
chrIII	974600	975100	Heterochromatin
chrIII	975100	975700	Heterochromatin
chrIII	975700	975800	H3K27me3 repressed
chrIII	975800	977500	Heterochromatin
chrIII	977500	977700	Heterochromatin
chrIII	977700	978200	Heterochromatin
chrIII	978200	978500	Heterochromatin
chrIII	978500	978900	Heterochromatin
chrIII	978900	979200	H3K27me3 repressed
chrIII	979200	979400	Heterochromatin
chrIII	979400	980200	Low signal
chrIII	980200	980400	H3K27me3 repressed
chrIII	980400	980800	Low signal
chrIII	980800	981300	Repressed enhancer
chrIII	981300	981500	Low signal
chrIII	981500	982200	Transcribed gene body
chrIII	982200	982800	TSS/Promoter
chrIII	982800	983000	Transcribed gene body
chrIII	983000	983300	Transcribed gene body
chrIII	983300	983400	Transcribed gene body
chrIII	983400	984300	Transcribed gene body
chrIII	984300	984400	Transcribed gene body
chrIII	984400	985900	Transcribed gene body
chrIII	985900	986400	Transcribed gene body
chrIII	986400	987100	Transcribed gene body
chrIII	987100	987700	Transcribed gene body
chrIII	987700	988700	Transcribed gene body
chrIII	988700	988800	Transcribed gene body
chrIII	988800	989400	Transcribed gene body
chrIII	989400	989500	Active enhancer
chrIII	989500	989800	Active enhancer
chrIII	989800	989900	Active enhancer
chrIII	989900	990100	Active enhancer
chrIII	990100	990600	Heterochromatin
chrIII	990600	990800	H3K27me3 repressed
chrIII	990800	991700	Heterochromatin
chrIII	991700	991900	Low signal
chrIII	991900	992000	H3K27me3 repressed
chrIII	992000	992300	Low signal
chrIII	992300	993500	Low signal
chrIII	993500	994100	Heterochromatin
chrIII	994100	994300	H3K27me3 repressed
chrIII	994300	995000	Low signal
chrIII	995000	995100	H3K27me3 repressed
chrIII	995100	996800	Heterochromatin
chrIII	996800	997300	Low signal
chrIII	997300	997400	Heterochromatin
chrIII	997400	997500	H3K27me3 repressed
chrIII	997500	997800	Heterochromatin
chrIII	997800	998000	Heterochromatin
chrIII	998000	999900	Heterochromatin
chrIII	999900	1000100	H3K27me3 repressed
chrIII	1000100	1000300	Heterochromatin
chrIII	1000300	1000400	H3K27me3 repressed
chrIII	1000400	1001300	Heterochromatin
chrIII	1001300	1002700	Low signal
chrIII	1002700	1002800	H3K27me3 repressed
chrIII	1002800	1003300	Heterochromatin
chrIII	1003300	1003400	Heterochromatin
chrIII	1003400	1003500	H3K27me3 repressed
chrIII	1003500	1005900	Heterochromatin
chrIII	1005900	1006100	H3K27me3 repressed
chrIII	1006100	1007300	Heterochromatin
chrIII	1007300	1007500	Heterochromatin
chrIII	1007500	1007800	Heterochromatin
chrIII	1007800	1008500	Low signal
chrIII	1008500	1009600	Heterochromatin
chrIII	1009600	1009700	H3K27me3 repressed
chrIII	1009700	1011400	Heterochromatin
chrIII	1011400	1011500	H3K27me3 repressed
chrIII	1011500	1011600	Heterochromatin
chrIII	1011600	1012300	Heterochromatin
chrIII	1012300	1015600	Low signal
chrIII	1015600	1015800	H3K27me3 repressed
chrIII	1015800	1016900	Heterochromatin
chrIII	1016900	1017200	Heterochromatin
chrIII	1017200	1017400	Heterochromatin
chrIII	1017400	1021600	Low signal
chrIII	1021600	1021700	H3K27me3 repressed
chrIII	1021700	1021900	Low signal
chrIII	1021900	1022900	Heterochromatin
chrIII	1022900	1023100	Heterochromatin
chrIII	1023100	1026000	Heterochromatin
chrIII	1026000	1026900	Low signal
chrIII	1026900	1027600	Transcribed gene body
chrIII	1027600	1028500	Low signal
chrIII	1028500	1028900	Repressed enhancer
chrIII	1028900	1029700	Low signal
chrIII	1029700	1030000	Transcribed gene body
chrIII	1030000	1030600	Low signal
chrIII	1030600	1031800	Transcribed gene body
chrIII	1031800	1031900	Low signal
chrIII	1031900	1032600	Transcribed gene body
chrIII	1032600	1032800	Transcribed gene body
chrIII	1032800	1032900	Transcribed gene body
chrIII	1032900	1035200	Transcribed gene body
chrIII	1035200	1035500	Transcribed gene body
chrIII	1035500	1036600	Transcribed gene body
chrIII	1036600	1036700	Transcribed gene body
chrIII	1036700	1037100	TSS/Promoter
chrIII	1037100	1037300	TSS/Promoter
chrIII	1037300	1037700	TSS/Promoter
chrIII	1037700	1038000	TSS/Promoter
chrIII	1038000	1039100	Transcribed gene body
chrIII	1039100	1039500	Active enhancer
chrIII	1039500	1039900	Transcribed gene body
chrIII	1039900	1041200	Transcribed gene body
chrIII	1041200	1041800	Low signal
chrIII	1041800	1041900	Transcribed gene body
chrIII	1041900	1042000	Transcribed gene body
[truncated: 167,789 more rows]
