# Supplementary material for: Chromatin accessibility dynamics reveal novel functional enhancers in C. elegans
Source: Genome Res. 2017 Dec;27(12):2096–107. doi: 10.1101/gr.226233.117 (PMC5741055; doi:10.1101/gr.226233.117)
Supplement: Supplemental Material [file supp_gr.226233.117_Supplemental_Table_S11.xlsx]

## Sheet: S11 - YA ChromHMM predictions
chrIII	0	200	H3K27me3 repressed
chrIII	200	300	H3K27me3 repressed
chrIII	300	600	Heterochromatin
chrIII	600	900	H3K27me3 repressed
chrIII	900	1000	Heterochromatin
chrIII	1000	1200	Heterochromatin
chrIII	1200	1900	Heterochromatin
chrIII	1900	2700	Low signal
chrIII	2700	2900	H3K27me3 repressed
chrIII	2900	3300	Low signal
chrIII	3300	3400	Heterochromatin
chrIII	3400	3800	Low signal
chrIII	3800	4000	H3K27me3 repressed
chrIII	4000	6100	Low signal
chrIII	6100	6200	H3K27me3 repressed
chrIII	6200	6600	Low signal
chrIII	6600	6800	Heterochromatin
chrIII	6800	6900	H3K27me3 repressed
chrIII	6900	7200	Active enhancer
chrIII	7200	7300	Active enhancer
chrIII	7300	7400	Active enhancer
chrIII	7400	8100	Low signal
chrIII	8100	8500	Repressed enhancer
chrIII	8500	8900	Low signal
chrIII	8900	9100	Low signal
chrIII	9100	10200	Heterochromatin
chrIII	10200	10300	H3K27me3 repressed
chrIII	10300	10400	Heterochromatin
chrIII	10400	10600	Heterochromatin
chrIII	10600	10800	Heterochromatin
chrIII	10800	11100	H3K27me3 repressed
chrIII	11100	11700	Heterochromatin
chrIII	11700	11900	H3K27me3 repressed
chrIII	11900	12700	Heterochromatin
chrIII	12700	13300	H3K27me3 repressed
chrIII	13300	13500	Heterochromatin
chrIII	13500	13600	H3K27me3 repressed
chrIII	13600	14100	Active enhancer
chrIII	14100	14300	Low signal
chrIII	14300	14700	H3K27me3 repressed
chrIII	14700	16300	Active enhancer
chrIII	16300	16500	Low signal
chrIII	16500	16600	Active enhancer
chrIII	16600	17700	Low signal
chrIII	17700	18000	Repressed enhancer
chrIII	18000	18100	H3K27me3 repressed
chrIII	18100	18500	Heterochromatin
chrIII	18500	18800	Heterochromatin
chrIII	18800	18900	H3K27me3 repressed
chrIII	18900	19600	Heterochromatin
chrIII	19600	19800	H3K27me3 repressed
chrIII	19800	21100	Heterochromatin
chrIII	21100	21800	H3K27me3 repressed
chrIII	21800	22800	Heterochromatin
chrIII	22800	23400	H3K27me3 repressed
chrIII	23400	23600	Heterochromatin
chrIII	23600	23700	H3K27me3 repressed
chrIII	23700	23900	Low signal
chrIII	23900	24000	Repressed enhancer
chrIII	24000	25100	Low signal
chrIII	25100	25700	Active enhancer
chrIII	25700	25900	H3K27me3 repressed
chrIII	25900	27100	Heterochromatin
chrIII	27100	27200	H3K27me3 repressed
chrIII	27200	27300	Active enhancer
chrIII	27300	27500	Low signal
chrIII	27500	27800	Active enhancer
chrIII	27800	28300	Low signal
chrIII	28300	28900	Active enhancer
chrIII	28900	29100	Active enhancer
chrIII	29100	31400	Active enhancer
chrIII	31400	31700	Low signal
chrIII	31700	31800	H3K27me3 repressed
chrIII	31800	32900	Heterochromatin
chrIII	32900	33100	H3K27me3 repressed
chrIII	33100	33900	Heterochromatin
chrIII	33900	34000	H3K27me3 repressed
chrIII	34000	34500	Heterochromatin
chrIII	34500	35400	Heterochromatin
chrIII	35400	35700	Heterochromatin
chrIII	35700	36400	Heterochromatin
chrIII	36400	37000	Heterochromatin
chrIII	37000	38300	Heterochromatin
chrIII	38300	39400	Heterochromatin
chrIII	39400	39500	H3K27me3 repressed
chrIII	39500	39700	Heterochromatin
chrIII	39700	39900	H3K27me3 repressed
chrIII	39900	40600	Heterochromatin
chrIII	40600	40800	H3K27me3 repressed
chrIII	40800	41000	Heterochromatin
chrIII	41000	43100	Heterochromatin
chrIII	43100	43300	H3K27me3 repressed
chrIII	43300	43400	Heterochromatin
chrIII	43400	43600	Heterochromatin
chrIII	43600	43700	H3K27me3 repressed
chrIII	43700	45100	Heterochromatin
chrIII	45100	45600	Heterochromatin
chrIII	45600	46400	Heterochromatin
chrIII	46400	46600	H3K27me3 repressed
chrIII	46600	47000	Heterochromatin
chrIII	47000	47100	H3K27me3 repressed
chrIII	47100	47800	Heterochromatin
chrIII	47800	48000	H3K27me3 repressed
chrIII	48000	48400	Heterochromatin
chrIII	48400	48700	H3K27me3 repressed
chrIII	48700	49100	Heterochromatin
chrIII	49100	50000	H3K27me3 repressed
chrIII	50000	50300	Heterochromatin
chrIII	50300	50400	H3K27me3 repressed
chrIII	50400	50500	Heterochromatin
chrIII	50500	51300	H3K27me3 repressed
chrIII	51300	51500	Heterochromatin
chrIII	51500	51900	H3K27me3 repressed
chrIII	51900	52600	Heterochromatin
chrIII	52600	53400	H3K27me3 repressed
chrIII	53400	53800	Heterochromatin
chrIII	53800	54200	H3K27me3 repressed
chrIII	54200	55400	Heterochromatin
chrIII	55400	55500	H3K27me3 repressed
chrIII	55500	56100	Heterochromatin
chrIII	56100	56400	Low signal
chrIII	56400	56500	H3K27me3 repressed
chrIII	56500	57100	Low signal
chrIII	57100	57700	Low signal
chrIII	57700	58200	Transcribed gene body
chrIII	58200	58300	Transcribed gene body
chrIII	58300	58400	Transcribed gene body
chrIII	58400	58500	Transcribed gene body
chrIII	58500	58600	Transcribed gene body
chrIII	58600	58800	Transcribed gene body
chrIII	58800	58900	Transcribed gene body
chrIII	58900	59400	Low signal
chrIII	59400	59800	H3K27me3 repressed
chrIII	59800	62100	Heterochromatin
chrIII	62100	62300	H3K27me3 repressed
chrIII	62300	63000	Heterochromatin
chrIII	63000	63200	H3K27me3 repressed
chrIII	63200	63400	Heterochromatin
chrIII	63400	64300	H3K27me3 repressed
chrIII	64300	64700	Low signal
chrIII	64700	65200	Active enhancer
chrIII	65200	65300	Active enhancer
chrIII	65300	66400	Active enhancer
chrIII	66400	66500	Active enhancer
chrIII	66500	68200	Active enhancer
chrIII	68200	68900	Low signal
chrIII	68900	69200	Transcribed gene body
chrIII	69200	69400	Transcribed gene body
chrIII	69400	69600	Transcribed gene body
chrIII	69600	69700	Transcribed gene body
chrIII	69700	70000	Transcribed gene body
chrIII	70000	71000	Transcribed gene body
chrIII	71000	71200	Transcribed gene body
chrIII	71200	71400	Transcribed gene body
chrIII	71400	71500	Transcribed gene body
chrIII	71500	71600	Transcribed gene body
chrIII	71600	72100	Transcribed gene body
chrIII	72100	72400	TSS/Promoter
chrIII	72400	72700	Transcribed gene body
chrIII	72700	73400	Transcribed gene body
chrIII	73400	73500	Transcribed gene body
chrIII	73500	73600	Transcribed gene body
chrIII	73600	73900	TSS/Promoter
chrIII	73900	74200	Transcribed gene body
chrIII	74200	74400	Transcribed gene body
chrIII	74400	74500	Transcribed gene body
chrIII	74500	74700	Transcribed gene body
chrIII	74700	74800	Transcribed gene body
chrIII	74800	75100	Transcribed gene body
chrIII	75100	75300	Transcribed gene body
chrIII	75300	75400	Transcribed gene body
chrIII	75400	75500	Transcribed gene body
chrIII	75500	76000	Transcribed gene body
chrIII	76000	76600	Transcribed gene body
chrIII	76600	76800	Transcribed gene body
chrIII	76800	77100	TSS/Promoter
chrIII	77100	77300	Transcribed gene body
chrIII	77300	77700	Transcribed gene body
chrIII	77700	77900	Transcribed gene body
chrIII	77900	78400	Transcribed gene body
chrIII	78400	78600	Transcribed gene body
chrIII	78600	78700	Transcribed gene body
chrIII	78700	79500	Low signal
chrIII	79500	79900	Transcribed gene body
chrIII	79900	80400	Transcribed gene body
chrIII	80400	81000	Transcribed gene body
chrIII	81000	81100	Transcribed gene body
chrIII	81100	81200	Transcribed gene body
chrIII	81200	81300	Transcribed gene body
chrIII	81300	82600	Transcribed gene body
chrIII	82600	82900	Transcribed gene body
chrIII	82900	83600	Transcribed gene body
chrIII	83600	84000	Transcribed gene body
chrIII	84000	84800	Transcribed gene body
chrIII	84800	85200	TSS/Promoter
chrIII	85200	85700	Transcribed gene body
chrIII	85700	85800	Transcribed gene body
chrIII	85800	86300	TSS/Promoter
chrIII	86300	86400	TSS/Promoter
chrIII	86400	86800	TSS/Promoter
chrIII	86800	87100	TSS/Promoter
chrIII	87100	87500	TSS/Promoter
chrIII	87500	87600	TSS/Promoter
chrIII	87600	88200	TSS/Promoter
chrIII	88200	88300	Transcribed gene body
chrIII	88300	88800	Transcribed gene body
chrIII	88800	89100	Transcribed gene body
chrIII	89100	89300	Transcribed gene body
chrIII	89300	89400	Repressed enhancer
chrIII	89400	89700	Low signal
chrIII	89700	90000	Repressed enhancer
chrIII	90000	90100	Low signal
chrIII	90100	90300	Active enhancer
chrIII	90300	90400	TSS/Promoter
chrIII	90400	90700	TSS/Promoter
chrIII	90700	91100	Transcribed gene body
chrIII	91100	91200	Transcribed gene body
chrIII	91200	91300	Transcribed gene body
chrIII	91300	91600	Transcribed gene body
chrIII	91600	91900	TSS/Promoter
chrIII	91900	92400	Transcribed gene body
chrIII	92400	92600	Transcribed gene body
chrIII	92600	93100	Transcribed gene body
chrIII	93100	93300	Transcribed gene body
chrIII	93300	93800	Transcribed gene body
chrIII	93800	93900	Transcribed gene body
chrIII	93900	94100	TSS/Promoter
chrIII	94100	94200	TSS/Promoter
chrIII	94200	94700	Transcribed gene body
chrIII	94700	94900	TSS/Promoter
chrIII	94900	95200	Active enhancer
chrIII	95200	95400	Active enhancer
chrIII	95400	95600	Active enhancer
chrIII	95600	95800	Low signal
chrIII	95800	96100	Active enhancer
chrIII	96100	96200	Active enhancer
chrIII	96200	97000	Repressed enhancer
chrIII	97000	104200	Low signal
chrIII	104200	104300	H3K27me3 repressed
chrIII	104300	105700	Low signal
chrIII	105700	105800	Repressed enhancer
chrIII	105800	107200	Low signal
chrIII	107200	107500	Repressed enhancer
chrIII	107500	108900	Low signal
chrIII	108900	109100	H3K27me3 repressed
chrIII	109100	110100	Low signal
chrIII	110100	110200	H3K27me3 repressed
chrIII	110200	111200	Low signal
chrIII	111200	111600	Low signal
chrIII	111600	112100	Repressed enhancer
chrIII	112100	112200	Low signal
chrIII	112200	113200	Low signal
chrIII	113200	113300	H3K27me3 repressed
chrIII	113300	113400	Low signal
chrIII	113400	113500	H3K27me3 repressed
chrIII	113500	114100	Low signal
chrIII	114100	114500	Heterochromatin
chrIII	114500	114700	H3K27me3 repressed
chrIII	114700	115200	Active enhancer
chrIII	115200	115800	H3K27me3 repressed
chrIII	115800	116000	Heterochromatin
chrIII	116000	116400	Heterochromatin
chrIII	116400	116700	Heterochromatin
chrIII	116700	117200	H3K27me3 repressed
chrIII	117200	117600	Heterochromatin
chrIII	117600	118800	Heterochromatin
chrIII	118800	120900	Heterochromatin
chrIII	120900	121400	Heterochromatin
chrIII	121400	122200	Heterochromatin
chrIII	122200	122400	H3K27me3 repressed
chrIII	122400	124400	Heterochromatin
chrIII	124400	124800	Low signal
chrIII	124800	125000	H3K27me3 repressed
chrIII	125000	125500	Low signal
chrIII	125500	125800	H3K27me3 repressed
chrIII	125800	126600	Low signal
chrIII	126600	126700	H3K27me3 repressed
chrIII	126700	127000	Low signal
chrIII	127000	127100	H3K27me3 repressed
chrIII	127100	127800	Low signal
chrIII	127800	127900	H3K27me3 repressed
chrIII	127900	128500	Low signal
chrIII	128500	128700	H3K27me3 repressed
chrIII	128700	129700	Low signal
chrIII	129700	129800	H3K27me3 repressed
chrIII	129800	130500	Low signal
chrIII	130500	130600	H3K27me3 repressed
chrIII	130600	130800	Low signal
chrIII	130800	130900	H3K27me3 repressed
chrIII	130900	131400	Low signal
chrIII	131400	131500	Repressed enhancer
chrIII	131500	131600	Active enhancer
chrIII	131600	131700	Active enhancer
chrIII	131700	132200	Low signal
chrIII	132200	133000	Transcribed gene body
chrIII	133000	133700	Low signal
chrIII	133700	134000	Transcribed gene body
chrIII	134000	134300	Transcribed gene body
chrIII	134300	134600	Transcribed gene body
chrIII	134600	136000	Low signal
chrIII	136000	136300	Transcribed gene body
chrIII	136300	136500	Transcribed gene body
chrIII	136500	136700	Low signal
chrIII	136700	137500	H3K27me3 repressed
chrIII	137500	137600	Heterochromatin
chrIII	137600	137800	H3K27me3 repressed
chrIII	137800	138300	Heterochromatin
chrIII	138300	138500	Heterochromatin
chrIII	138500	139700	Heterochromatin
chrIII	139700	139900	Heterochromatin
chrIII	139900	140000	H3K27me3 repressed
chrIII	140000	140200	Heterochromatin
chrIII	140200	140300	Heterochromatin
chrIII	140300	140400	H3K27me3 repressed
chrIII	140400	141100	Heterochromatin
chrIII	141100	141200	Low signal
chrIII	141200	141400	H3K27me3 repressed
chrIII	141400	141500	Heterochromatin
chrIII	141500	141900	H3K27me3 repressed
chrIII	141900	143300	Low signal
chrIII	143300	143500	H3K27me3 repressed
chrIII	143500	144600	Low signal
chrIII	144600	144700	H3K27me3 repressed
chrIII	144700	145200	Low signal
chrIII	145200	145400	H3K27me3 repressed
chrIII	145400	146100	Low signal
chrIII	146100	146200	H3K27me3 repressed
chrIII	146200	146500	Low signal
chrIII	146500	146600	Repressed enhancer
chrIII	146600	147000	Low signal
chrIII	147000	147500	H3K27me3 repressed
chrIII	147500	147900	Active enhancer
chrIII	147900	148100	Low signal
chrIII	148100	148200	Active enhancer
chrIII	148200	148400	Low signal
chrIII	148400	148900	Low signal
chrIII	148900	149000	H3K27me3 repressed
chrIII	149000	150100	Low signal
chrIII	150100	150200	H3K27me3 repressed
chrIII	150200	150900	Low signal
chrIII	150900	151500	H3K27me3 repressed
chrIII	151500	152100	Low signal
chrIII	152100	152200	H3K27me3 repressed
chrIII	152200	152700	Low signal
chrIII	152700	153100	H3K27me3 repressed
chrIII	153100	154000	Heterochromatin
chrIII	154000	154100	H3K27me3 repressed
chrIII	154100	154700	Heterochromatin
chrIII	154700	155300	Heterochromatin
chrIII	155300	155700	Heterochromatin
chrIII	155700	156500	Heterochromatin
chrIII	156500	157100	Heterochromatin
chrIII	157100	160100	Heterochromatin
chrIII	160100	160900	H3K27me3 repressed
chrIII	160900	161900	Heterochromatin
chrIII	161900	162400	H3K27me3 repressed
chrIII	162400	162600	Heterochromatin
chrIII	162600	162800	Heterochromatin
chrIII	162800	163200	Heterochromatin
chrIII	163200	163500	Heterochromatin
chrIII	163500	163700	Heterochromatin
chrIII	163700	164700	Heterochromatin
chrIII	164700	165700	Heterochromatin
chrIII	165700	166200	Heterochromatin
chrIII	166200	168000	Heterochromatin
chrIII	168000	169300	Heterochromatin
chrIII	169300	169600	Heterochromatin
chrIII	169600	170100	Heterochromatin
chrIII	170100	170600	Heterochromatin
chrIII	170600	171900	Heterochromatin
chrIII	171900	172200	Heterochromatin
chrIII	172200	173500	Heterochromatin
chrIII	173500	173700	Heterochromatin
chrIII	173700	173800	Heterochromatin
chrIII	173800	174000	Heterochromatin
chrIII	174000	174500	Heterochromatin
chrIII	174500	174800	Heterochromatin
chrIII	174800	176400	Heterochromatin
chrIII	176400	176900	Heterochromatin
chrIII	176900	177600	Heterochromatin
chrIII	177600	177900	H3K27me3 repressed
chrIII	177900	178100	Heterochromatin
chrIII	178100	178300	Heterochromatin
chrIII	178300	178500	H3K27me3 repressed
chrIII	178500	178700	Heterochromatin
chrIII	178700	178900	H3K27me3 repressed
chrIII	178900	179300	Heterochromatin
chrIII	179300	179600	H3K27me3 repressed
chrIII	179600	180500	Heterochromatin
chrIII	180500	180700	Heterochromatin
chrIII	180700	181400	Heterochromatin
chrIII	181400	181800	H3K27me3 repressed
chrIII	181800	182200	Heterochromatin
chrIII	182200	182700	H3K27me3 repressed
chrIII	182700	183300	Low signal
chrIII	183300	183500	Low signal
chrIII	183500	183800	Repressed enhancer
chrIII	183800	184100	Transcribed gene body
chrIII	184100	184400	Transcribed gene body
chrIII	184400	184500	Transcribed gene body
chrIII	184500	184800	Repressed enhancer
chrIII	184800	185400	Low signal
chrIII	185400	185600	Active enhancer
chrIII	185600	186100	Low signal
chrIII	186100	186200	Repressed enhancer
chrIII	186200	186300	Transcribed gene body
chrIII	186300	186500	Transcribed gene body
chrIII	186500	188100	TSS/Promoter
chrIII	188100	188200	TSS/Promoter
chrIII	188200	188800	TSS/Promoter
chrIII	188800	188900	TSS/Promoter
chrIII	188900	189800	TSS/Promoter
chrIII	189800	189900	Transcribed gene body
chrIII	189900	190300	Transcribed gene body
chrIII	190300	190900	Transcribed gene body
chrIII	190900	191000	Transcribed gene body
chrIII	191000	191200	Transcribed gene body
chrIII	191200	191600	Transcribed gene body
chrIII	191600	191900	Transcribed gene body
chrIII	191900	192100	Transcribed gene body
chrIII	192100	193400	Transcribed gene body
chrIII	193400	193500	Transcribed gene body
chrIII	193500	193700	Transcribed gene body
chrIII	193700	194000	Transcribed gene body
chrIII	194000	194100	Transcribed gene body
chrIII	194100	194300	Transcribed gene body
chrIII	194300	194400	Transcribed gene body
chrIII	194400	194600	Transcribed gene body
chrIII	194600	195300	Transcribed gene body
chrIII	195300	195500	Transcribed gene body
chrIII	195500	195600	Transcribed gene body
chrIII	195600	195800	Transcribed gene body
chrIII	195800	196100	Transcribed gene body
chrIII	196100	196400	Transcribed gene body
chrIII	196400	196600	Transcribed gene body
chrIII	196600	196700	Transcribed gene body
chrIII	196700	197100	Transcribed gene body
chrIII	197100	197400	Transcribed gene body
chrIII	197400	197500	Transcribed gene body
chrIII	197500	197600	Transcribed gene body
chrIII	197600	198000	TSS/Promoter
chrIII	198000	200000	Low signal
chrIII	200000	200400	Transcribed gene body
chrIII	200400	201000	Low signal
chrIII	201000	201500	Transcribed gene body
chrIII	201500	201900	Transcribed gene body
chrIII	201900	202000	Transcribed gene body
chrIII	202000	202300	Transcribed gene body
chrIII	202300	202800	Transcribed gene body
chrIII	202800	203100	Transcribed gene body
chrIII	203100	203300	Transcribed gene body
chrIII	203300	204100	Transcribed gene body
chrIII	204100	204400	Transcribed gene body
chrIII	204400	205700	Transcribed gene body
chrIII	205700	207600	Transcribed gene body
chrIII	207600	207800	Transcribed gene body
chrIII	207800	208500	Transcribed gene body
chrIII	208500	208900	Transcribed gene body
chrIII	208900	210300	Transcribed gene body
chrIII	210300	210400	Transcribed gene body
chrIII	210400	210800	Transcribed gene body
chrIII	210800	211300	Transcribed gene body
chrIII	211300	211700	Transcribed gene body
chrIII	211700	212000	Transcribed gene body
chrIII	212000	212400	Transcribed gene body
chrIII	212400	212500	Transcribed gene body
chrIII	212500	212700	Transcribed gene body
chrIII	212700	213100	Transcribed gene body
chrIII	213100	213200	Transcribed gene body
chrIII	213200	213500	Transcribed gene body
chrIII	213500	214900	Transcribed gene body
chrIII	214900	215400	Transcribed gene body
chrIII	215400	215800	Transcribed gene body
chrIII	215800	216400	Transcribed gene body
chrIII	216400	216900	Transcribed gene body
chrIII	216900	217400	Transcribed gene body
chrIII	217400	217800	Transcribed gene body
chrIII	217800	218000	Transcribed gene body
chrIII	218000	218200	Transcribed gene body
chrIII	218200	218600	Transcribed gene body
chrIII	218600	218800	Transcribed gene body
chrIII	218800	220400	Transcribed gene body
chrIII	220400	220700	Active enhancer
chrIII	220700	221500	Transcribed gene body
chrIII	221500	221900	Active enhancer
chrIII	221900	224600	Transcribed gene body
chrIII	224600	225000	Transcribed gene body
chrIII	225000	225100	Transcribed gene body
chrIII	225100	225300	Transcribed gene body
chrIII	225300	225700	Transcribed gene body
chrIII	225700	226300	Transcribed gene body
chrIII	226300	227600	Transcribed gene body
chrIII	227600	228600	Transcribed gene body
chrIII	228600	228900	Transcribed gene body
chrIII	228900	230400	Transcribed gene body
chrIII	230400	230800	Transcribed gene body
chrIII	230800	231200	Transcribed gene body
chrIII	231200	231500	Transcribed gene body
chrIII	231500	232300	Transcribed gene body
chrIII	232300	232500	Transcribed gene body
chrIII	232500	232700	Transcribed gene body
chrIII	232700	233000	Transcribed gene body
chrIII	233000	233400	Low signal
chrIII	233400	233500	Transcribed gene body
chrIII	233500	233600	Transcribed gene body
chrIII	233600	233900	Transcribed gene body
chrIII	233900	234000	Transcribed gene body
chrIII	234000	234600	Transcribed gene body
chrIII	234600	235100	Active enhancer
chrIII	235100	235500	Active enhancer
chrIII	235500	235700	TSS/Promoter
chrIII	235700	236200	TSS/Promoter
chrIII	236200	237000	Transcribed gene body
chrIII	237000	237200	Transcribed gene body
chrIII	237200	239600	Transcribed gene body
chrIII	239600	240200	Transcribed gene body
chrIII	240200	241000	Transcribed gene body
chrIII	241000	241200	Transcribed gene body
chrIII	241200	241400	Transcribed gene body
chrIII	241400	241800	Transcribed gene body
chrIII	241800	242000	Transcribed gene body
chrIII	242000	242400	Transcribed gene body
chrIII	242400	242700	Transcribed gene body
chrIII	242700	243100	Transcribed gene body
chrIII	243100	243500	Transcribed gene body
chrIII	243500	243700	Transcribed gene body
chrIII	243700	244500	Transcribed gene body
chrIII	244500	244900	Transcribed gene body
chrIII	244900	245500	Transcribed gene body
chrIII	245500	245700	Transcribed gene body
chrIII	245700	245900	Transcribed gene body
chrIII	245900	246700	Transcribed gene body
chrIII	246700	247100	Transcribed gene body
chrIII	247100	247400	Transcribed gene body
chrIII	247400	247600	Transcribed gene body
chrIII	247600	247700	Transcribed gene body
chrIII	247700	247800	Transcribed gene body
chrIII	247800	248000	Transcribed gene body
chrIII	248000	248300	Transcribed gene body
chrIII	248300	248700	Transcribed gene body
chrIII	248700	249000	Transcribed gene body
chrIII	249000	249400	Transcribed gene body
chrIII	249400	249500	Transcribed gene body
chrIII	249500	249700	Transcribed gene body
chrIII	249700	249800	Transcribed gene body
chrIII	249800	250200	Transcribed gene body
chrIII	250200	250500	Transcribed gene body
chrIII	250500	250700	Transcribed gene body
chrIII	250700	251000	Transcribed gene body
chrIII	251000	251300	Transcribed gene body
chrIII	251300	252100	Transcribed gene body
chrIII	252100	252200	Transcribed gene body
chrIII	252200	252300	Transcribed gene body
chrIII	252300	252800	Transcribed gene body
chrIII	252800	252900	Transcribed gene body
chrIII	252900	253300	Transcribed gene body
chrIII	253300	253400	Transcribed gene body
chrIII	253400	253500	Transcribed gene body
chrIII	253500	254500	Transcribed gene body
chrIII	254500	254800	Transcribed gene body
chrIII	254800	254900	Transcribed gene body
chrIII	254900	255000	Transcribed gene body
chrIII	255000	259300	Transcribed gene body
chrIII	259300	259600	Transcribed gene body
chrIII	259600	260000	Transcribed gene body
chrIII	260000	260300	Transcribed gene body
chrIII	260300	260500	Transcribed gene body
chrIII	260500	260600	Transcribed gene body
chrIII	260600	261100	Transcribed gene body
chrIII	261100	261500	Transcribed gene body
chrIII	261500	262100	Transcribed gene body
chrIII	262100	262200	Transcribed gene body
chrIII	262200	262900	Low signal
chrIII	262900	263000	Transcribed gene body
chrIII	263000	263200	Transcribed gene body
chrIII	263200	263600	Transcribed gene body
chrIII	263600	263800	Transcribed gene body
chrIII	263800	264000	Transcribed gene body
chrIII	264000	264400	Transcribed gene body
chrIII	264400	264600	Transcribed gene body
chrIII	264600	265100	Transcribed gene body
chrIII	265100	265200	Transcribed gene body
chrIII	265200	265400	Transcribed gene body
chrIII	265400	265500	Transcribed gene body
chrIII	265500	266300	Transcribed gene body
chrIII	266300	266600	Transcribed gene body
chrIII	266600	267000	Transcribed gene body
chrIII	267000	267300	Transcribed gene body
chrIII	267300	268400	Low signal
chrIII	268400	268900	Transcribed gene body
chrIII	268900	269000	Transcribed gene body
chrIII	269000	269500	Transcribed gene body
chrIII	269500	269800	Transcribed gene body
chrIII	269800	270300	Transcribed gene body
chrIII	270300	270400	Transcribed gene body
chrIII	270400	270600	Transcribed gene body
chrIII	270600	270700	Transcribed gene body
chrIII	270700	271500	Low signal
chrIII	271500	272100	Transcribed gene body
chrIII	272100	272800	Transcribed gene body
chrIII	272800	272900	Transcribed gene body
chrIII	272900	276600	Low signal
chrIII	276600	278800	Transcribed gene body
chrIII	278800	278900	Transcribed gene body
chrIII	278900	279100	Transcribed gene body
chrIII	279100	280800	Transcribed gene body
chrIII	280800	281400	Transcribed gene body
chrIII	281400	281500	Transcribed gene body
chrIII	281500	281900	Transcribed gene body
chrIII	281900	282100	Transcribed gene body
chrIII	282100	282500	Transcribed gene body
chrIII	282500	282600	Transcribed gene body
chrIII	282600	282900	Transcribed gene body
chrIII	282900	283000	Transcribed gene body
chrIII	283000	283500	Low signal
chrIII	283500	283600	Repressed enhancer
chrIII	283600	283700	Transcribed gene body
chrIII	283700	284100	Transcribed gene body
chrIII	284100	284900	Transcribed gene body
chrIII	284900	285300	Transcribed gene body
chrIII	285300	285500	Transcribed gene body
chrIII	285500	285600	Transcribed gene body
chrIII	285600	286100	Transcribed gene body
chrIII	286100	286300	Transcribed gene body
chrIII	286300	286500	Transcribed gene body
chrIII	286500	286600	Transcribed gene body
chrIII	286600	287100	Transcribed gene body
chrIII	287100	287500	Transcribed gene body
chrIII	287500	287600	Transcribed gene body
chrIII	287600	287700	Transcribed gene body
chrIII	287700	289900	Transcribed gene body
chrIII	289900	290000	Transcribed gene body
chrIII	290000	292300	Low signal
chrIII	292300	292800	Transcribed gene body
chrIII	292800	293800	Transcribed gene body
chrIII	293800	294800	Transcribed gene body
chrIII	294800	295700	Transcribed gene body
chrIII	295700	296800	Transcribed gene body
chrIII	296800	297200	Transcribed gene body
chrIII	297200	298700	Transcribed gene body
chrIII	298700	299700	TSS/Promoter
chrIII	299700	301600	Transcribed gene body
chrIII	301600	302600	Low signal
chrIII	302600	303100	Transcribed gene body
chrIII	303100	303400	Transcribed gene body
chrIII	303400	304400	Transcribed gene body
chrIII	304400	304800	Transcribed gene body
chrIII	304800	305400	Transcribed gene body
chrIII	305400	305600	Transcribed gene body
chrIII	305600	305700	Transcribed gene body
chrIII	305700	305800	Transcribed gene body
chrIII	305800	307200	Transcribed gene body
chrIII	307200	307400	Transcribed gene body
chrIII	307400	307600	Transcribed gene body
chrIII	307600	307800	Transcribed gene body
chrIII	307800	308700	Transcribed gene body
chrIII	308700	308900	Transcribed gene body
chrIII	308900	309100	Transcribed gene body
chrIII	309100	309600	Transcribed gene body
chrIII	309600	309900	Transcribed gene body
chrIII	309900	310500	Transcribed gene body
chrIII	310500	311200	Low signal
chrIII	311200	311400	Active enhancer
chrIII	311400	311500	Repressed enhancer
chrIII	311500	312800	Low signal
chrIII	312800	313000	TSS/Promoter
chrIII	313000	313700	Low signal
chrIII	313700	313900	Transcribed gene body
chrIII	313900	314200	Transcribed gene body
chrIII	314200	314800	Transcribed gene body
chrIII	314800	315000	Transcribed gene body
chrIII	315000	315400	Transcribed gene body
chrIII	315400	315600	Active enhancer
chrIII	315600	315800	Transcribed gene body
chrIII	315800	316000	Transcribed gene body
chrIII	316000	316800	Low signal
chrIII	316800	316900	Repressed enhancer
chrIII	316900	319800	Low signal
chrIII	319800	320000	H3K27me3 repressed
chrIII	320000	320400	Heterochromatin
chrIII	320400	320600	H3K27me3 repressed
chrIII	320600	321400	Heterochromatin
chrIII	321400	321500	H3K27me3 repressed
chrIII	321500	332500	Low signal
chrIII	332500	333100	Low signal
chrIII	333100	333700	Transcribed gene body
chrIII	333700	333800	Transcribed gene body
chrIII	333800	334600	Transcribed gene body
chrIII	334600	335100	Transcribed gene body
chrIII	335100	335300	Transcribed gene body
chrIII	335300	335900	Transcribed gene body
chrIII	335900	336300	Transcribed gene body
chrIII	336300	336600	Transcribed gene body
chrIII	336600	336900	Transcribed gene body
chrIII	336900	337000	Transcribed gene body
chrIII	337000	337100	Transcribed gene body
chrIII	337100	337200	Transcribed gene body
chrIII	337200	337300	Transcribed gene body
chrIII	337300	337400	Transcribed gene body
chrIII	337400	337500	Transcribed gene body
chrIII	337500	338100	Transcribed gene body
chrIII	338100	338600	Transcribed gene body
chrIII	338600	338900	Transcribed gene body
chrIII	338900	339200	Transcribed gene body
chrIII	339200	339500	Transcribed gene body
chrIII	339500	339800	Transcribed gene body
chrIII	339800	340000	Transcribed gene body
chrIII	340000	340100	Transcribed gene body
chrIII	340100	340200	Transcribed gene body
chrIII	340200	340300	Transcribed gene body
chrIII	340300	340600	TSS/Promoter
chrIII	340600	340800	Transcribed gene body
chrIII	340800	341300	Low signal
chrIII	341300	341400	Transcribed gene body
chrIII	341400	341600	TSS/Promoter
chrIII	341600	341900	Transcribed gene body
chrIII	341900	342400	Transcribed gene body
chrIII	342400	342600	Transcribed gene body
chrIII	342600	343000	Transcribed gene body
chrIII	343000	343100	Transcribed gene body
chrIII	343100	343600	TSS/Promoter
chrIII	343600	343700	TSS/Promoter
chrIII	343700	344200	TSS/Promoter
chrIII	344200	344300	Active enhancer
chrIII	344300	344400	Active enhancer
chrIII	344400	344700	Repressed enhancer
chrIII	344700	344900	Transcribed gene body
chrIII	344900	345100	Transcribed gene body
chrIII	345100	345400	Transcribed gene body
chrIII	345400	345500	Transcribed gene body
chrIII	345500	345800	TSS/Promoter
chrIII	345800	346000	Transcribed gene body
chrIII	346000	346300	Transcribed gene body
chrIII	346300	346500	TSS/Promoter
chrIII	346500	346600	Transcribed gene body
chrIII	346600	347500	TSS/Promoter
chrIII	347500	347800	Transcribed gene body
chrIII	347800	347900	Transcribed gene body
chrIII	347900	348000	Transcribed gene body
chrIII	348000	348400	TSS/Promoter
chrIII	348400	348500	TSS/Promoter
chrIII	348500	348900	TSS/Promoter
chrIII	348900	349800	TSS/Promoter
chrIII	349800	350000	TSS/Promoter
chrIII	350000	350100	TSS/Promoter
chrIII	350100	350200	TSS/Promoter
chrIII	350200	350300	TSS/Promoter
chrIII	350300	350400	TSS/Promoter
chrIII	350400	350500	TSS/Promoter
chrIII	350500	350700	TSS/Promoter
chrIII	350700	351100	TSS/Promoter
chrIII	351100	351300	TSS/Promoter
chrIII	351300	352100	TSS/Promoter
chrIII	352100	352200	Active enhancer
chrIII	352200	353000	TSS/Promoter
chrIII	353000	353200	Transcribed gene body
chrIII	353200	353400	Low signal
chrIII	353400	353600	Transcribed gene body
chrIII	353600	353700	TSS/Promoter
chrIII	353700	353800	TSS/Promoter
chrIII	353800	353900	TSS/Promoter
chrIII	353900	354100	TSS/Promoter
chrIII	354100	354600	TSS/Promoter
chrIII	354600	354700	TSS/Promoter
chrIII	354700	354800	TSS/Promoter
chrIII	354800	355900	TSS/Promoter
chrIII	355900	356000	TSS/Promoter
chrIII	356000	356100	TSS/Promoter
chrIII	356100	356500	Low signal
chrIII	356500	357300	Active enhancer
chrIII	357300	357500	Low signal
chrIII	357500	358500	Low signal
chrIII	358500	358600	H3K27me3 repressed
chrIII	358600	360100	Low signal
chrIII	360100	360200	H3K27me3 repressed
chrIII	360200	360400	Low signal
chrIII	360400	360500	Repressed enhancer
chrIII	360500	360600	Active enhancer
chrIII	360600	362200	Low signal
chrIII	362200	363200	Heterochromatin
chrIII	363200	363400	H3K27me3 repressed
chrIII	363400	364400	Heterochromatin
chrIII	364400	365100	H3K27me3 repressed
chrIII	365100	366400	Heterochromatin
chrIII	366400	367300	H3K27me3 repressed
chrIII	367300	367600	Heterochromatin
chrIII	367600	368100	H3K27me3 repressed
chrIII	368100	368300	Transcribed gene body
chrIII	368300	368500	Transcribed gene body
chrIII	368500	369800	Transcribed gene body
chrIII	369800	370200	Low signal
chrIII	370200	371200	H3K27me3 repressed
chrIII	371200	371900	Low signal
chrIII	371900	373200	Transcribed gene body
chrIII	373200	373500	Transcribed gene body
chrIII	373500	374100	Transcribed gene body
chrIII	374100	374200	H3K27me3 repressed
chrIII	374200	376100	Heterochromatin
chrIII	376100	376600	H3K27me3 repressed
chrIII	376600	377000	Heterochromatin
chrIII	377000	377400	H3K27me3 repressed
chrIII	377400	378200	Heterochromatin
chrIII	378200	378600	H3K27me3 repressed
chrIII	378600	378900	Heterochromatin
chrIII	378900	379100	Heterochromatin
chrIII	379100	379600	Heterochromatin
chrIII	379600	379700	H3K27me3 repressed
chrIII	379700	380900	Heterochromatin
chrIII	380900	381300	H3K27me3 repressed
chrIII	381300	381600	Heterochromatin
chrIII	381600	381900	Heterochromatin
chrIII	381900	382100	Heterochromatin
chrIII	382100	382400	H3K27me3 repressed
chrIII	382400	382600	Heterochromatin
chrIII	382600	382800	H3K27me3 repressed
chrIII	382800	383400	Heterochromatin
chrIII	383400	383600	Heterochromatin
chrIII	383600	384600	Heterochromatin
chrIII	384600	385100	H3K27me3 repressed
chrIII	385100	385600	Heterochromatin
chrIII	385600	385900	H3K27me3 repressed
chrIII	385900	386100	Transcribed gene body
chrIII	386100	386300	Transcribed gene body
chrIII	386300	386600	Transcribed gene body
chrIII	386600	386900	Transcribed gene body
chrIII	386900	387700	Transcribed gene body
chrIII	387700	387800	Transcribed gene body
chrIII	387800	388000	Transcribed gene body
chrIII	388000	388200	Transcribed gene body
chrIII	388200	389200	Low signal
chrIII	389200	391000	Low signal
chrIII	391000	391200	H3K27me3 repressed
chrIII	391200	392000	Heterochromatin
chrIII	392000	392500	H3K27me3 repressed
chrIII	392500	393000	Heterochromatin
chrIII	393000	393300	H3K27me3 repressed
chrIII	393300	396400	Low signal
chrIII	396400	396600	Transcribed gene body
chrIII	396600	397800	Low signal
chrIII	397800	398800	Transcribed gene body
chrIII	398800	399100	Transcribed gene body
chrIII	399100	400000	Transcribed gene body
chrIII	400000	400600	Transcribed gene body
chrIII	400600	400700	Transcribed gene body
chrIII	400700	402000	Transcribed gene body
chrIII	402000	402900	Transcribed gene body
chrIII	402900	403500	Transcribed gene body
chrIII	403500	403800	Transcribed gene body
chrIII	403800	404000	Transcribed gene body
chrIII	404000	405300	Transcribed gene body
chrIII	405300	406800	Transcribed gene body
chrIII	406800	407000	Transcribed gene body
chrIII	407000	407600	Low signal
chrIII	407600	407800	Repressed enhancer
chrIII	407800	408400	Low signal
chrIII	408400	408600	Transcribed gene body
chrIII	408600	409100	Transcribed gene body
chrIII	409100	409700	Low signal
chrIII	409700	410500	Transcribed gene body
chrIII	410500	410900	Transcribed gene body
chrIII	410900	411200	Transcribed gene body
chrIII	411200	411400	Transcribed gene body
chrIII	411400	411900	Transcribed gene body
chrIII	411900	412100	Transcribed gene body
chrIII	412100	412300	TSS/Promoter
chrIII	412300	412400	Transcribed gene body
chrIII	412400	413000	Low signal
chrIII	413000	413100	Transcribed gene body
chrIII	413100	413700	Low signal
chrIII	413700	413900	Transcribed gene body
chrIII	413900	415300	Low signal
chrIII	415300	415600	Transcribed gene body
chrIII	415600	416500	Low signal
chrIII	416500	416600	Transcribed gene body
chrIII	416600	416900	Low signal
chrIII	416900	417100	Transcribed gene body
chrIII	417100	418300	Transcribed gene body
chrIII	418300	418600	Transcribed gene body
chrIII	418600	418700	Transcribed gene body
chrIII	418700	418800	Transcribed gene body
chrIII	418800	420400	Low signal
chrIII	420400	420700	Transcribed gene body
chrIII	420700	421000	Active enhancer
chrIII	421000	421100	Transcribed gene body
chrIII	421100	421600	Transcribed gene body
chrIII	421600	421800	Transcribed gene body
chrIII	421800	422100	Transcribed gene body
chrIII	422100	422300	Low signal
chrIII	422300	422500	Repressed enhancer
chrIII	422500	422700	Low signal
chrIII	422700	422800	Active enhancer
chrIII	422800	423100	Repressed enhancer
chrIII	423100	423200	Active enhancer
chrIII	423200	423800	Active enhancer
chrIII	423800	423900	TSS/Promoter
chrIII	423900	424000	TSS/Promoter
chrIII	424000	424300	Active enhancer
chrIII	424300	428200	Low signal
chrIII	428200	428400	H3K27me3 repressed
chrIII	428400	428500	Low signal
chrIII	428500	428600	Active enhancer
chrIII	428600	428700	H3K27me3 repressed
chrIII	428700	429000	Low signal
chrIII	429000	429200	Low signal
chrIII	429200	429300	Heterochromatin
chrIII	429300	430100	Low signal
chrIII	430100	430200	Low signal
chrIII	430200	430300	Transcribed gene body
chrIII	430300	430800	Transcribed gene body
chrIII	430800	430900	Transcribed gene body
chrIII	430900	431000	Transcribed gene body
chrIII	431000	431200	Low signal
chrIII	431200	431600	H3K27me3 repressed
chrIII	431600	434300	Low signal
chrIII	434300	434400	Active enhancer
chrIII	434400	434600	Active enhancer
chrIII	434600	434800	Active enhancer
chrIII	434800	435000	Low signal
chrIII	435000	435400	Transcribed gene body
chrIII	435400	435500	Transcribed gene body
chrIII	435500	435900	Transcribed gene body
chrIII	435900	436200	Transcribed gene body
chrIII	436200	436400	Transcribed gene body
chrIII	436400	436600	Transcribed gene body
chrIII	436600	436900	Transcribed gene body
chrIII	436900	437000	Transcribed gene body
chrIII	437000	437400	Transcribed gene body
chrIII	437400	437900	Transcribed gene body
chrIII	437900	438100	Transcribed gene body
chrIII	438100	438200	Transcribed gene body
chrIII	438200	438300	Transcribed gene body
chrIII	438300	438400	Transcribed gene body
chrIII	438400	438800	Transcribed gene body
chrIII	438800	439000	Transcribed gene body
chrIII	439000	439600	Transcribed gene body
chrIII	439600	439800	TSS/Promoter
chrIII	439800	439900	Transcribed gene body
chrIII	439900	440000	Transcribed gene body
chrIII	440000	440600	Low signal
chrIII	440600	440800	H3K27me3 repressed
chrIII	440800	441000	Heterochromatin
chrIII	441000	443700	Heterochromatin
chrIII	443700	444200	Heterochromatin
chrIII	444200	444300	H3K27me3 repressed
chrIII	444300	444700	Heterochromatin
chrIII	444700	444900	H3K27me3 repressed
chrIII	444900	445500	Low signal
chrIII	445500	445600	Repressed enhancer
chrIII	445600	445900	Low signal
chrIII	445900	446200	H3K27me3 repressed
chrIII	446200	446800	Low signal
chrIII	446800	447000	H3K27me3 repressed
chrIII	447000	448400	Low signal
chrIII	448400	448700	H3K27me3 repressed
chrIII	448700	448900	Low signal
chrIII	448900	449200	H3K27me3 repressed
chrIII	449200	452000	Low signal
chrIII	452000	452100	H3K27me3 repressed
chrIII	452100	453700	Low signal
chrIII	453700	454000	H3K27me3 repressed
chrIII	454000	454300	Heterochromatin
chrIII	454300	454800	Heterochromatin
chrIII	454800	455200	Heterochromatin
chrIII	455200	456000	Heterochromatin
chrIII	456000	456600	H3K27me3 repressed
chrIII	456600	457400	Heterochromatin
chrIII	457400	458000	H3K27me3 repressed
chrIII	458000	458600	Heterochromatin
chrIII	458600	458900	H3K27me3 repressed
chrIII	458900	459000	Heterochromatin
chrIII	459000	459100	H3K27me3 repressed
chrIII	459100	459600	Heterochromatin
chrIII	459600	460100	H3K27me3 repressed
chrIII	460100	460500	Heterochromatin
chrIII	460500	460800	H3K27me3 repressed
chrIII	460800	461400	Low signal
chrIII	461400	461500	Transcribed gene body
chrIII	461500	463000	Transcribed gene body
chrIII	463000	463300	Transcribed gene body
chrIII	463300	463700	Transcribed gene body
chrIII	463700	463900	Transcribed gene body
chrIII	463900	464400	Transcribed gene body
chrIII	464400	464600	Transcribed gene body
chrIII	464600	464800	Transcribed gene body
chrIII	464800	464900	Transcribed gene body
chrIII	464900	465200	TSS/Promoter
chrIII	465200	465700	Transcribed gene body
chrIII	465700	466100	Transcribed gene body
chrIII	466100	467000	Transcribed gene body
chrIII	467000	467400	Transcribed gene body
chrIII	467400	467800	Transcribed gene body
chrIII	467800	467900	Transcribed gene body
chrIII	467900	468100	Transcribed gene body
chrIII	468100	468400	Transcribed gene body
chrIII	468400	468600	TSS/Promoter
chrIII	468600	469300	Transcribed gene body
chrIII	469300	469900	Transcribed gene body
chrIII	469900	470100	Transcribed gene body
chrIII	470100	470200	Transcribed gene body
chrIII	470200	470400	Transcribed gene body
chrIII	470400	471000	Transcribed gene body
chrIII	471000	471400	TSS/Promoter
chrIII	471400	471800	TSS/Promoter
chrIII	471800	472200	TSS/Promoter
chrIII	472200	472400	TSS/Promoter
chrIII	472400	472900	TSS/Promoter
chrIII	472900	473000	Transcribed gene body
chrIII	473000	473200	Transcribed gene body
chrIII	473200	473500	Transcribed gene body
chrIII	473500	473900	TSS/Promoter
chrIII	473900	474000	Transcribed gene body
chrIII	474000	474400	Transcribed gene body
chrIII	474400	475100	Transcribed gene body
chrIII	475100	475200	Transcribed gene body
chrIII	475200	475400	Transcribed gene body
chrIII	475400	475500	Transcribed gene body
chrIII	475500	475700	Transcribed gene body
chrIII	475700	475900	Transcribed gene body
chrIII	475900	477100	Transcribed gene body
chrIII	477100	477400	Transcribed gene body
chrIII	477400	477500	Transcribed gene body
chrIII	477500	477800	Transcribed gene body
chrIII	477800	478100	Transcribed gene body
chrIII	478100	478700	Transcribed gene body
chrIII	478700	479500	Transcribed gene body
chrIII	479500	479600	Transcribed gene body
chrIII	479600	479800	Transcribed gene body
chrIII	479800	480500	Transcribed gene body
chrIII	480500	480700	TSS/Promoter
chrIII	480700	481200	Transcribed gene body
chrIII	481200	481500	Transcribed gene body
chrIII	481500	481800	Transcribed gene body
chrIII	481800	482000	Transcribed gene body
chrIII	482000	482200	TSS/Promoter
chrIII	482200	482300	Transcribed gene body
chrIII	482300	483700	Transcribed gene body
chrIII	483700	483900	Transcribed gene body
chrIII	483900	484300	Transcribed gene body
chrIII	484300	484800	Transcribed gene body
chrIII	484800	484900	H3K27me3 repressed
chrIII	484900	485200	Heterochromatin
chrIII	485200	485500	H3K27me3 repressed
chrIII	485500	486200	Heterochromatin
chrIII	486200	486400	H3K27me3 repressed
chrIII	486400	488800	Heterochromatin
chrIII	488800	489200	Heterochromatin
chrIII	489200	489900	Heterochromatin
chrIII	489900	490200	H3K27me3 repressed
chrIII	490200	490700	Heterochromatin
chrIII	490700	490800	H3K27me3 repressed
chrIII	490800	491000	Active enhancer
chrIII	491000	491100	Active enhancer
chrIII	491100	491500	TSS/Promoter
chrIII	491500	491700	TSS/Promoter
chrIII	491700	492000	TSS/Promoter
chrIII	492000	492100	Transcribed gene body
chrIII	492100	492600	Transcribed gene body
chrIII	492600	493400	Low signal
chrIII	493400	493500	Transcribed gene body
chrIII	493500	493900	Transcribed gene body
chrIII	493900	494400	Transcribed gene body
chrIII	494400	494900	TSS/Promoter
chrIII	494900	495000	Transcribed gene body
chrIII	495000	496200	Transcribed gene body
chrIII	496200	496600	Transcribed gene body
chrIII	496600	496900	Transcribed gene body
chrIII	496900	497800	Transcribed gene body
chrIII	497800	498100	Transcribed gene body
chrIII	498100	498400	Transcribed gene body
chrIII	498400	498500	Transcribed gene body
chrIII	498500	498800	Transcribed gene body
chrIII	498800	499000	Transcribed gene body
chrIII	499000	499100	Transcribed gene body
chrIII	499100	499300	Transcribed gene body
chrIII	499300	499600	Transcribed gene body
chrIII	499600	500400	Transcribed gene body
chrIII	500400	500600	Transcribed gene body
chrIII	500600	500700	Transcribed gene body
chrIII	500700	500900	Transcribed gene body
chrIII	500900	501100	Transcribed gene body
chrIII	501100	501200	Transcribed gene body
chrIII	501200	501600	Transcribed gene body
chrIII	501600	502000	Transcribed gene body
chrIII	502000	502100	Transcribed gene body
chrIII	502100	504600	Low signal
chrIII	504600	504800	H3K27me3 repressed
chrIII	504800	505700	Heterochromatin
chrIII	505700	509700	H3K27me3 repressed
chrIII	509700	510500	Heterochromatin
chrIII	510500	510700	Heterochromatin
chrIII	510700	510800	Heterochromatin
chrIII	510800	511200	H3K27me3 repressed
chrIII	511200	512100	Heterochromatin
chrIII	512100	512400	H3K27me3 repressed
chrIII	512400	513200	Heterochromatin
chrIII	513200	513700	H3K27me3 repressed
chrIII	513700	513800	Heterochromatin
chrIII	513800	514200	Heterochromatin
chrIII	514200	514400	Heterochromatin
chrIII	514400	516300	H3K27me3 repressed
chrIII	516300	517500	Heterochromatin
chrIII	517500	517800	H3K27me3 repressed
chrIII	517800	518400	Heterochromatin
chrIII	518400	518800	H3K27me3 repressed
chrIII	518800	519100	Heterochromatin
chrIII	519100	522900	Heterochromatin
chrIII	522900	524000	Heterochromatin
chrIII	524000	524600	H3K27me3 repressed
chrIII	524600	525400	Heterochromatin
chrIII	525400	525600	H3K27me3 repressed
chrIII	525600	527100	Heterochromatin
chrIII	527100	527300	H3K27me3 repressed
chrIII	527300	527900	Heterochromatin
chrIII	527900	528000	H3K27me3 repressed
chrIII	528000	529300	Heterochromatin
chrIII	529300	529600	Repressed enhancer
chrIII	529600	530300	Low signal
chrIII	530300	530400	Repressed enhancer
chrIII	530400	531300	Low signal
chrIII	531300	531400	Active enhancer
chrIII	531400	531500	Active enhancer
chrIII	531500	532000	Repressed enhancer
chrIII	532000	532500	Low signal
chrIII	532500	532700	H3K27me3 repressed
chrIII	532700	532900	Heterochromatin
chrIII	532900	533100	H3K27me3 repressed
chrIII	533100	533600	Low signal
chrIII	533600	534000	Repressed enhancer
chrIII	534000	534200	Low signal
chrIII	534200	535100	Repressed enhancer
chrIII	535100	535600	Low signal
chrIII	535600	535700	Repressed enhancer
chrIII	535700	535900	Low signal
chrIII	535900	536200	Repressed enhancer
chrIII	536200	536400	Low signal
chrIII	536400	536500	Repressed enhancer
chrIII	536500	536700	Low signal
chrIII	536700	536800	Repressed enhancer
chrIII	536800	537500	Low signal
chrIII	537500	537700	Repressed enhancer
chrIII	537700	538600	Low signal
chrIII	538600	538700	Repressed enhancer
chrIII	538700	539100	Low signal
chrIII	539100	539300	Repressed enhancer
chrIII	539300	539700	Low signal
chrIII	539700	539800	Repressed enhancer
chrIII	539800	539900	Low signal
chrIII	539900	540000	Repressed enhancer
chrIII	540000	540900	Low signal
chrIII	540900	541300	Repressed enhancer
chrIII	541300	542100	Low signal
chrIII	542100	542300	Repressed enhancer
chrIII	542300	542800	Low signal
chrIII	542800	542900	Transcribed gene body
chrIII	542900	543100	Transcribed gene body
chrIII	543100	543300	Low signal
chrIII	543300	543400	Repressed enhancer
chrIII	543400	543700	Low signal
chrIII	543700	544100	Repressed enhancer
chrIII	544100	544800	Low signal
chrIII	544800	544900	Repressed enhancer
chrIII	544900	545100	Active enhancer
chrIII	545100	545200	Active enhancer
chrIII	545200	545700	Low signal
chrIII	545700	545800	Repressed enhancer
chrIII	545800	546300	Transcribed gene body
chrIII	546300	547100	Low signal
chrIII	547100	547300	Repressed enhancer
chrIII	547300	547800	Low signal
chrIII	547800	547900	Repressed enhancer
chrIII	547900	548300	Low signal
chrIII	548300	548400	H3K27me3 repressed
chrIII	548400	548700	Heterochromatin
chrIII	548700	548800	H3K27me3 repressed
chrIII	548800	549400	Heterochromatin
chrIII	549400	550000	H3K27me3 repressed
chrIII	550000	550400	Heterochromatin
chrIII	550400	550900	H3K27me3 repressed
chrIII	550900	551300	Heterochromatin
chrIII	551300	551500	Heterochromatin
chrIII	551500	551700	Heterochromatin
chrIII	551700	551800	H3K27me3 repressed
chrIII	551800	552500	Heterochromatin
chrIII	552500	552800	H3K27me3 repressed
chrIII	552800	553300	Heterochromatin
chrIII	553300	553500	H3K27me3 repressed
chrIII	553500	555000	Low signal
chrIII	555000	555100	Repressed enhancer
chrIII	555100	556700	Low signal
chrIII	556700	556800	Repressed enhancer
chrIII	556800	558100	Low signal
chrIII	558100	558300	Active enhancer
chrIII	558300	558900	Low signal
chrIII	558900	559000	Repressed enhancer
chrIII	559000	559500	Low signal
chrIII	559500	559700	Repressed enhancer
chrIII	559700	560500	Low signal
chrIII	560500	560600	Active enhancer
chrIII	560600	560900	Active enhancer
chrIII	560900	561000	Active enhancer
chrIII	561000	561100	Repressed enhancer
chrIII	561100	561600	Low signal
chrIII	561600	561800	Transcribed gene body
chrIII	561800	562000	Transcribed gene body
chrIII	562000	562100	Transcribed gene body
chrIII	562100	562300	Active enhancer
chrIII	562300	563100	Low signal
chrIII	563100	563200	Active enhancer
chrIII	563200	563300	Repressed enhancer
chrIII	563300	563800	Low signal
chrIII	563800	563900	Repressed enhancer
chrIII	563900	564400	Low signal
chrIII	564400	564500	Repressed enhancer
chrIII	564500	564800	Low signal
chrIII	564800	565000	Repressed enhancer
chrIII	565000	565100	Active enhancer
chrIII	565100	565400	Low signal
chrIII	565400	565600	Transcribed gene body
chrIII	565600	565800	Active enhancer
chrIII	565800	566700	Transcribed gene body
chrIII	566700	566800	Transcribed gene body
chrIII	566800	567000	Low signal
chrIII	567000	567100	Transcribed gene body
chrIII	567100	567400	Low signal
chrIII	567400	567900	Transcribed gene body
chrIII	567900	568300	Transcribed gene body
chrIII	568300	568900	Low signal
chrIII	568900	569000	Repressed enhancer
chrIII	569000	569600	Low signal
chrIII	569600	569800	Active enhancer
chrIII	569800	570800	Low signal
chrIII	570800	570900	Repressed enhancer
chrIII	570900	571400	Low signal
chrIII	571400	571500	Active enhancer
chrIII	571500	571600	Active enhancer
chrIII	571600	571800	Low signal
chrIII	571800	571900	Repressed enhancer
chrIII	571900	572000	Low signal
chrIII	572000	572200	Active enhancer
chrIII	572200	572700	Low signal
chrIII	572700	572800	Repressed enhancer
chrIII	572800	573300	Low signal
chrIII	573300	574000	Transcribed gene body
chrIII	574000	574500	Transcribed gene body
chrIII	574500	574800	Transcribed gene body
chrIII	574800	575100	Transcribed gene body
chrIII	575100	575600	Transcribed gene body
chrIII	575600	576100	Low signal
chrIII	576100	576300	TSS/Promoter
chrIII	576300	577400	Transcribed gene body
chrIII	577400	577600	Transcribed gene body
chrIII	577600	577900	Transcribed gene body
chrIII	577900	578200	Transcribed gene body
chrIII	578200	579200	Transcribed gene body
chrIII	579200	579600	Transcribed gene body
chrIII	579600	579700	Transcribed gene body
chrIII	579700	579900	Transcribed gene body
chrIII	579900	580500	Transcribed gene body
chrIII	580500	581000	Transcribed gene body
chrIII	581000	581500	Low signal
chrIII	581500	582200	Transcribed gene body
chrIII	582200	582700	Low signal
chrIII	582700	583200	Transcribed gene body
chrIII	583200	583800	Low signal
chrIII	583800	584200	Transcribed gene body
chrIII	584200	584600	Transcribed gene body
chrIII	584600	584800	Transcribed gene body
chrIII	584800	584900	Transcribed gene body
chrIII	584900	585200	Transcribed gene body
chrIII	585200	585700	Transcribed gene body
chrIII	585700	586000	Transcribed gene body
chrIII	586000	587400	Transcribed gene body
chrIII	587400	587700	Transcribed gene body
chrIII	587700	588200	Transcribed gene body
chrIII	588200	588500	Transcribed gene body
chrIII	588500	590800	Low signal
chrIII	590800	590900	Transcribed gene body
chrIII	590900	591100	Transcribed gene body
chrIII	591100	591300	Transcribed gene body
chrIII	591300	591400	Transcribed gene body
chrIII	591400	591700	Transcribed gene body
chrIII	591700	591900	Transcribed gene body
chrIII	591900	592400	Transcribed gene body
chrIII	592400	593400	Transcribed gene body
chrIII	593400	593600	Transcribed gene body
chrIII	593600	593700	Transcribed gene body
chrIII	593700	593800	Transcribed gene body
chrIII	593800	593900	Transcribed gene body
chrIII	593900	594200	Transcribed gene body
chrIII	594200	594600	Transcribed gene body
chrIII	594600	595000	Transcribed gene body
chrIII	595000	595700	Transcribed gene body
chrIII	595700	595900	TSS/Promoter
chrIII	595900	596000	Transcribed gene body
chrIII	596000	596500	Transcribed gene body
chrIII	596500	597000	Transcribed gene body
chrIII	597000	597200	Transcribed gene body
chrIII	597200	597400	Transcribed gene body
chrIII	597400	597900	Transcribed gene body
chrIII	597900	598500	Active enhancer
chrIII	598500	599000	Active enhancer
chrIII	599000	600000	Low signal
chrIII	600000	600300	Active enhancer
chrIII	600300	600400	Active enhancer
chrIII	600400	600800	Low signal
chrIII	600800	603200	Low signal
chrIII	603200	603500	H3K27me3 repressed
chrIII	603500	603600	Heterochromatin
chrIII	603600	603800	H3K27me3 repressed
chrIII	603800	604600	Heterochromatin
chrIII	604600	604800	Heterochromatin
chrIII	604800	606100	Heterochromatin
chrIII	606100	606600	H3K27me3 repressed
chrIII	606600	607000	Heterochromatin
chrIII	607000	607200	H3K27me3 repressed
chrIII	607200	607400	Heterochromatin
chrIII	607400	607700	Heterochromatin
chrIII	607700	608700	Heterochromatin
chrIII	608700	608900	Heterochromatin
chrIII	608900	611400	Heterochromatin
chrIII	611400	611500	H3K27me3 repressed
chrIII	611500	612000	Heterochromatin
chrIII	612000	612200	Heterochromatin
chrIII	612200	613100	Heterochromatin
chrIII	613100	613400	H3K27me3 repressed
chrIII	613400	613700	Heterochromatin
chrIII	613700	614100	Heterochromatin
chrIII	614100	615100	Heterochromatin
chrIII	615100	615200	H3K27me3 repressed
chrIII	615200	615400	Low signal
chrIII	615400	616100	Low signal
chrIII	616100	616300	Low signal
chrIII	616300	616400	Repressed enhancer
chrIII	616400	616700	Low signal
chrIII	616700	616800	H3K27me3 repressed
chrIII	616800	617400	Low signal
chrIII	617400	617500	H3K27me3 repressed
chrIII	617500	618300	Low signal
chrIII	618300	618700	Low signal
chrIII	618700	618800	Transcribed gene body
chrIII	618800	619100	Transcribed gene body
chrIII	619100	619200	Transcribed gene body
chrIII	619200	619600	Transcribed gene body
chrIII	619600	619700	Transcribed gene body
chrIII	619700	620000	Low signal
chrIII	620000	621500	Active enhancer
chrIII	621500	621800	Active enhancer
chrIII	621800	621900	Active enhancer
chrIII	621900	622600	Low signal
chrIII	622600	622700	Repressed enhancer
chrIII	622700	622900	Low signal
chrIII	622900	623000	Repressed enhancer
chrIII	623000	623500	Low signal
chrIII	623500	624100	Active enhancer
chrIII	624100	624200	Active enhancer
chrIII	624200	624300	Active enhancer
chrIII	624300	624800	Low signal
chrIII	624800	624900	H3K27me3 repressed
chrIII	624900	625100	Heterochromatin
chrIII	625100	625200	H3K27me3 repressed
chrIII	625200	625700	Heterochromatin
chrIII	625700	625900	H3K27me3 repressed
chrIII	625900	626200	Heterochromatin
chrIII	626200	626300	H3K27me3 repressed
chrIII	626300	626600	Heterochromatin
chrIII	626600	627000	H3K27me3 repressed
chrIII	627000	628300	Heterochromatin
chrIII	628300	628400	H3K27me3 repressed
chrIII	628400	629000	Low signal
chrIII	629000	629200	Repressed enhancer
chrIII	629200	630300	Low signal
chrIII	630300	631000	Repressed enhancer
chrIII	631000	631300	Low signal
chrIII	631300	631500	Repressed enhancer
chrIII	631500	631800	Low signal
chrIII	631800	631900	Repressed enhancer
chrIII	631900	632000	Low signal
chrIII	632000	632600	Transcribed gene body
chrIII	632600	632900	Transcribed gene body
chrIII	632900	634200	Transcribed gene body
chrIII	634200	634500	TSS/Promoter
chrIII	634500	634800	TSS/Promoter
chrIII	634800	634900	Active enhancer
chrIII	634900	635200	Active enhancer
chrIII	635200	635400	Transcribed gene body
chrIII	635400	635700	Transcribed gene body
chrIII	635700	636400	Transcribed gene body
chrIII	636400	636600	Transcribed gene body
chrIII	636600	636700	Transcribed gene body
chrIII	636700	637200	Transcribed gene body
chrIII	637200	637600	Transcribed gene body
chrIII	637600	638100	Transcribed gene body
chrIII	638100	638300	Transcribed gene body
chrIII	638300	638400	Transcribed gene body
chrIII	638400	638500	Transcribed gene body
chrIII	638500	638600	Transcribed gene body
chrIII	638600	638700	Transcribed gene body
chrIII	638700	638900	Transcribed gene body
chrIII	638900	639000	Transcribed gene body
chrIII	639000	639700	Transcribed gene body
chrIII	639700	640200	TSS/Promoter
chrIII	640200	640300	TSS/Promoter
chrIII	640300	640800	TSS/Promoter
chrIII	640800	641000	TSS/Promoter
chrIII	641000	641500	TSS/Promoter
chrIII	641500	642000	Transcribed gene body
chrIII	642000	642900	Transcribed gene body
chrIII	642900	643300	Transcribed gene body
chrIII	643300	643900	Transcribed gene body
chrIII	643900	644400	Transcribed gene body
chrIII	644400	644900	Transcribed gene body
chrIII	644900	645300	Transcribed gene body
chrIII	645300	645600	Transcribed gene body
chrIII	645600	646100	Transcribed gene body
chrIII	646100	646200	Transcribed gene body
chrIII	646200	646300	Transcribed gene body
chrIII	646300	646600	Low signal
chrIII	646600	646800	Repressed enhancer
chrIII	646800	647800	Active enhancer
chrIII	647800	647900	Transcribed gene body
chrIII	647900	648000	Transcribed gene body
chrIII	648000	648400	Transcribed gene body
chrIII	648400	648500	Transcribed gene body
chrIII	648500	648600	Transcribed gene body
chrIII	648600	648800	Transcribed gene body
chrIII	648800	652000	Transcribed gene body
chrIII	652000	652900	Transcribed gene body
chrIII	652900	653100	Active enhancer
chrIII	653100	653800	Transcribed gene body
chrIII	653800	654200	Transcribed gene body
chrIII	654200	654300	Transcribed gene body
chrIII	654300	654500	Transcribed gene body
chrIII	654500	654700	Transcribed gene body
chrIII	654700	655800	Low signal
chrIII	655800	656000	H3K27me3 repressed
chrIII	656000	656800	Low signal
chrIII	656800	657100	Low signal
chrIII	657100	657200	Repressed enhancer
chrIII	657200	657500	H3K27me3 repressed
chrIII	657500	657600	Repressed enhancer
chrIII	657600	658700	Low signal
chrIII	658700	658900	H3K27me3 repressed
chrIII	658900	659600	Heterochromatin
chrIII	659600	659700	H3K27me3 repressed
chrIII	659700	660900	Heterochromatin
chrIII	660900	661300	Heterochromatin
chrIII	661300	662900	Heterochromatin
chrIII	662900	663300	H3K27me3 repressed
chrIII	663300	664200	Heterochromatin
chrIII	664200	664400	H3K27me3 repressed
chrIII	664400	664500	Heterochromatin
chrIII	664500	664700	Heterochromatin
chrIII	664700	665200	Heterochromatin
chrIII	665200	665500	H3K27me3 repressed
chrIII	665500	666200	Heterochromatin
chrIII	666200	667400	Low signal
chrIII	667400	667500	H3K27me3 repressed
chrIII	667500	667900	Low signal
chrIII	667900	668100	Low signal
chrIII	668100	668200	Active enhancer
chrIII	668200	668300	Active enhancer
chrIII	668300	668500	Repressed enhancer
chrIII	668500	670100	Low signal
chrIII	670100	670300	Repressed enhancer
chrIII	670300	670800	Low signal
chrIII	670800	671600	Active enhancer
chrIII	671600	671700	Heterochromatin
chrIII	671700	671900	Low signal
chrIII	671900	672100	H3K27me3 repressed
chrIII	672100	675300	Low signal
chrIII	675300	675400	Active enhancer
chrIII	675400	675500	Active enhancer
chrIII	675500	676100	Active enhancer
chrIII	676100	676200	Active enhancer
chrIII	676200	676300	Active enhancer
chrIII	676300	676800	Low signal
chrIII	676800	676900	Low signal
chrIII	676900	677000	H3K27me3 repressed
chrIII	677000	677300	Low signal
chrIII	677300	677400	H3K27me3 repressed
chrIII	677400	678100	Heterochromatin
chrIII	678100	678200	H3K27me3 repressed
chrIII	678200	679000	Low signal
chrIII	679000	679200	Transcribed gene body
chrIII	679200	679900	Low signal
chrIII	679900	680000	Repressed enhancer
chrIII	680000	680700	Low signal
chrIII	680700	681000	H3K27me3 repressed
chrIII	681000	682200	Heterochromatin
chrIII	682200	682400	Heterochromatin
chrIII	682400	683400	Heterochromatin
chrIII	683400	683900	Low signal
chrIII	683900	684000	Heterochromatin
chrIII	684000	685000	Low signal
chrIII	685000	685100	H3K27me3 repressed
chrIII	685100	685300	Low signal
chrIII	685300	685500	H3K27me3 repressed
chrIII	685500	686700	Low signal
chrIII	686700	686900	H3K27me3 repressed
chrIII	686900	687800	Low signal
chrIII	687800	687900	H3K27me3 repressed
chrIII	687900	688000	H3K27me3 repressed
chrIII	688000	688400	Heterochromatin
chrIII	688400	688600	H3K27me3 repressed
chrIII	688600	689800	Heterochromatin
chrIII	689800	690100	H3K27me3 repressed
chrIII	690100	690400	Heterochromatin
chrIII	690400	690700	H3K27me3 repressed
chrIII	690700	692000	Heterochromatin
chrIII	692000	692200	Heterochromatin
chrIII	692200	692600	Heterochromatin
chrIII	692600	693100	H3K27me3 repressed
chrIII	693100	693500	Low signal
chrIII	693500	693600	Transcribed gene body
chrIII	693600	694500	Transcribed gene body
chrIII	694500	694700	Transcribed gene body
chrIII	694700	694800	Transcribed gene body
chrIII	694800	695100	Transcribed gene body
chrIII	695100	695300	Transcribed gene body
chrIII	695300	695600	Transcribed gene body
chrIII	695600	695800	Transcribed gene body
chrIII	695800	696900	Low signal
chrIII	696900	697000	Repressed enhancer
chrIII	697000	697200	Low signal
chrIII	697200	698000	Low signal
chrIII	698000	698500	Heterochromatin
chrIII	698500	699000	Heterochromatin
chrIII	699000	699200	H3K27me3 repressed
chrIII	699200	699500	Heterochromatin
chrIII	699500	699700	H3K27me3 repressed
chrIII	699700	701000	Heterochromatin
chrIII	701000	701500	Low signal
chrIII	701500	701600	H3K27me3 repressed
chrIII	701600	704700	Low signal
chrIII	704700	705300	Heterochromatin
chrIII	705300	705800	Heterochromatin
chrIII	705800	706000	Heterochromatin
chrIII	706000	706300	H3K27me3 repressed
chrIII	706300	707900	Heterochromatin
chrIII	707900	708200	H3K27me3 repressed
chrIII	708200	708500	Heterochromatin
chrIII	708500	708700	Heterochromatin
chrIII	708700	708900	Heterochromatin
chrIII	708900	709200	H3K27me3 repressed
chrIII	709200	710000	Heterochromatin
chrIII	710000	710300	H3K27me3 repressed
chrIII	710300	710500	Heterochromatin
chrIII	710500	710600	H3K27me3 repressed
chrIII	710600	711000	Heterochromatin
chrIII	711000	712200	H3K27me3 repressed
chrIII	712200	712500	Heterochromatin
chrIII	712500	712700	H3K27me3 repressed
chrIII	712700	713300	Low signal
chrIII	713300	713400	H3K27me3 repressed
chrIII	713400	714200	Low signal
chrIII	714200	714400	H3K27me3 repressed
chrIII	714400	715400	Low signal
chrIII	715400	715500	H3K27me3 repressed
chrIII	715500	717900	Low signal
chrIII	717900	718000	H3K27me3 repressed
chrIII	718000	718500	Low signal
chrIII	718500	718800	Heterochromatin
chrIII	718800	719000	H3K27me3 repressed
chrIII	719000	719500	Heterochromatin
chrIII	719500	719900	H3K27me3 repressed
chrIII	719900	720700	Low signal
chrIII	720700	720900	H3K27me3 repressed
chrIII	720900	722300	Low signal
chrIII	722300	722700	H3K27me3 repressed
chrIII	722700	725100	Low signal
chrIII	725100	725500	H3K27me3 repressed
chrIII	725500	725900	Low signal
chrIII	725900	726000	H3K27me3 repressed
chrIII	726000	726500	Low signal
chrIII	726500	726600	H3K27me3 repressed
chrIII	726600	727600	Low signal
chrIII	727600	727700	Repressed enhancer
chrIII	727700	728000	Low signal
chrIII	728000	728400	H3K27me3 repressed
chrIII	728400	731500	Heterochromatin
chrIII	731500	731800	Heterochromatin
chrIII	731800	732400	Heterochromatin
chrIII	732400	733100	Heterochromatin
chrIII	733100	733700	Heterochromatin
chrIII	733700	733800	H3K27me3 repressed
chrIII	733800	734300	Heterochromatin
chrIII	734300	735200	Heterochromatin
chrIII	735200	735800	Heterochromatin
chrIII	735800	735900	H3K27me3 repressed
chrIII	735900	736700	Heterochromatin
chrIII	736700	736900	H3K27me3 repressed
chrIII	736900	737600	Heterochromatin
chrIII	737600	737900	Heterochromatin
chrIII	737900	738200	Heterochromatin
chrIII	738200	738400	H3K27me3 repressed
chrIII	738400	738600	Heterochromatin
chrIII	738600	738700	Heterochromatin
chrIII	738700	738800	Heterochromatin
chrIII	738800	739300	Heterochromatin
chrIII	739300	739800	Heterochromatin
chrIII	739800	740100	H3K27me3 repressed
chrIII	740100	740400	Heterochromatin
chrIII	740400	740500	H3K27me3 repressed
chrIII	740500	740700	Heterochromatin
chrIII	740700	740900	H3K27me3 repressed
chrIII	740900	741400	Heterochromatin
chrIII	741400	742100	H3K27me3 repressed
chrIII	742100	742400	Heterochromatin
chrIII	742400	742700	H3K27me3 repressed
chrIII	742700	743300	Heterochromatin
chrIII	743300	743900	Low signal
chrIII	743900	744500	Low signal
chrIII	744500	744600	Repressed enhancer
chrIII	744600	744800	Low signal
chrIII	744800	744900	Repressed enhancer
chrIII	744900	747000	Low signal
chrIII	747000	747200	Repressed enhancer
chrIII	747200	747500	Low signal
chrIII	747500	747600	Low signal
chrIII	747600	747700	H3K27me3 repressed
chrIII	747700	748000	Heterochromatin
chrIII	748000	748300	H3K27me3 repressed
chrIII	748300	748900	Heterochromatin
chrIII	748900	749100	H3K27me3 repressed
chrIII	749100	749700	Heterochromatin
chrIII	749700	749900	H3K27me3 repressed
chrIII	749900	750100	Heterochromatin
chrIII	750100	750300	H3K27me3 repressed
chrIII	750300	752600	Heterochromatin
chrIII	752600	752900	H3K27me3 repressed
chrIII	752900	753300	Heterochromatin
chrIII	753300	753600	Heterochromatin
chrIII	753600	754600	Heterochromatin
chrIII	754600	754900	H3K27me3 repressed
chrIII	754900	755700	Heterochromatin
chrIII	755700	756100	Heterochromatin
chrIII	756100	757500	Heterochromatin
chrIII	757500	757700	H3K27me3 repressed
chrIII	757700	759800	Heterochromatin
chrIII	759800	760200	H3K27me3 repressed
chrIII	760200	762200	Low signal
chrIII	762200	762300	H3K27me3 repressed
chrIII	762300	763200	Low signal
chrIII	763200	763300	H3K27me3 repressed
chrIII	763300	764300	Low signal
chrIII	764300	764400	Repressed enhancer
chrIII	764400	764600	Active enhancer
chrIII	764600	765200	Low signal
chrIII	765200	765300	Repressed enhancer
chrIII	765300	766400	Low signal
chrIII	766400	766600	Repressed enhancer
chrIII	766600	766800	Low signal
chrIII	766800	767000	Repressed enhancer
chrIII	767000	767400	Low signal
chrIII	767400	767500	Repressed enhancer
chrIII	767500	768100	Low signal
chrIII	768100	768400	Transcribed gene body
chrIII	768400	768600	Transcribed gene body
chrIII	768600	769300	Transcribed gene body
chrIII	769300	770300	Transcribed gene body
chrIII	770300	770400	Transcribed gene body
chrIII	770400	770700	Transcribed gene body
chrIII	770700	770800	Transcribed gene body
chrIII	770800	773400	Transcribed gene body
chrIII	773400	773500	Active enhancer
chrIII	773500	774000	Transcribed gene body
chrIII	774000	774400	Transcribed gene body
chrIII	774400	775200	Transcribed gene body
chrIII	775200	775500	Transcribed gene body
chrIII	775500	775700	TSS/Promoter
chrIII	775700	775800	Transcribed gene body
chrIII	775800	775900	Transcribed gene body
chrIII	775900	776000	Transcribed gene body
chrIII	776000	776200	Transcribed gene body
chrIII	776200	776400	Transcribed gene body
chrIII	776400	776600	Transcribed gene body
chrIII	776600	777000	Transcribed gene body
chrIII	777000	777300	Transcribed gene body
chrIII	777300	777500	Transcribed gene body
chrIII	777500	778100	TSS/Promoter
chrIII	778100	778400	TSS/Promoter
chrIII	778400	779100	TSS/Promoter
chrIII	779100	779500	Transcribed gene body
chrIII	779500	780000	Transcribed gene body
chrIII	780000	780500	Transcribed gene body
chrIII	780500	781000	Transcribed gene body
chrIII	781000	781600	Transcribed gene body
chrIII	781600	781800	Transcribed gene body
chrIII	781800	782300	Transcribed gene body
chrIII	782300	782800	Transcribed gene body
chrIII	782800	783200	TSS/Promoter
chrIII	783200	783300	TSS/Promoter
chrIII	783300	783700	TSS/Promoter
chrIII	783700	783900	TSS/Promoter
chrIII	783900	784500	Transcribed gene body
chrIII	784500	784600	Transcribed gene body
chrIII	784600	784900	Transcribed gene body
chrIII	784900	785200	Transcribed gene body
chrIII	785200	785700	Transcribed gene body
chrIII	785700	785900	Transcribed gene body
chrIII	785900	786000	Transcribed gene body
chrIII	786000	786500	Transcribed gene body
chrIII	786500	786900	Transcribed gene body
chrIII	786900	787300	Transcribed gene body
chrIII	787300	787600	Transcribed gene body
chrIII	787600	787900	Transcribed gene body
chrIII	787900	788800	Transcribed gene body
chrIII	788800	789200	Transcribed gene body
chrIII	789200	790200	Transcribed gene body
chrIII	790200	790700	Transcribed gene body
chrIII	790700	792200	Transcribed gene body
chrIII	792200	792400	Transcribed gene body
chrIII	792400	792600	Transcribed gene body
chrIII	792600	792700	Transcribed gene body
chrIII	792700	793200	Active enhancer
chrIII	793200	793400	Active enhancer
chrIII	793400	793500	Active enhancer
chrIII	793500	793900	Active enhancer
chrIII	793900	794000	TSS/Promoter
chrIII	794000	794300	TSS/Promoter
chrIII	794300	794700	TSS/Promoter
chrIII	794700	795100	Transcribed gene body
chrIII	795100	795600	TSS/Promoter
chrIII	795600	795900	Transcribed gene body
chrIII	795900	796000	Transcribed gene body
chrIII	796000	796200	Transcribed gene body
chrIII	796200	796300	Transcribed gene body
chrIII	796300	796800	Transcribed gene body
chrIII	796800	797200	Transcribed gene body
chrIII	797200	797400	Transcribed gene body
chrIII	797400	797700	Transcribed gene body
chrIII	797700	798900	Transcribed gene body
chrIII	798900	799500	Transcribed gene body
chrIII	799500	799800	Transcribed gene body
chrIII	799800	800600	Transcribed gene body
chrIII	800600	801000	Transcribed gene body
chrIII	801000	801300	Transcribed gene body
chrIII	801300	801600	Transcribed gene body
chrIII	801600	802100	Transcribed gene body
chrIII	802100	802300	Transcribed gene body
chrIII	802300	802900	Transcribed gene body
chrIII	802900	803000	Transcribed gene body
chrIII	803000	803300	Transcribed gene body
chrIII	803300	803500	Transcribed gene body
chrIII	803500	803700	Transcribed gene body
chrIII	803700	803800	Transcribed gene body
chrIII	803800	803900	Transcribed gene body
chrIII	803900	805500	Transcribed gene body
chrIII	805500	806200	Transcribed gene body
chrIII	806200	806400	Transcribed gene body
chrIII	806400	806600	Transcribed gene body
chrIII	806600	807300	Transcribed gene body
chrIII	807300	807400	Transcribed gene body
chrIII	807400	807700	Transcribed gene body
chrIII	807700	808600	Transcribed gene body
chrIII	808600	809300	Transcribed gene body
chrIII	809300	809600	Transcribed gene body
chrIII	809600	809900	Transcribed gene body
chrIII	809900	810100	Transcribed gene body
chrIII	810100	810400	Transcribed gene body
chrIII	810400	810600	Transcribed gene body
chrIII	810600	811700	Low signal
chrIII	811700	812400	H3K27me3 repressed
chrIII	812400	812700	Heterochromatin
chrIII	812700	813100	H3K27me3 repressed
chrIII	813100	813300	Heterochromatin
chrIII	813300	813400	Heterochromatin
chrIII	813400	813500	H3K27me3 repressed
chrIII	813500	814200	Heterochromatin
chrIII	814200	814700	Low signal
chrIII	814700	814800	Heterochromatin
chrIII	814800	815600	Low signal
chrIII	815600	815700	H3K27me3 repressed
chrIII	815700	816700	Low signal
chrIII	816700	816900	H3K27me3 repressed
chrIII	816900	817300	Low signal
chrIII	817300	817400	Heterochromatin
chrIII	817400	818300	Low signal
chrIII	818300	818700	H3K27me3 repressed
chrIII	818700	819400	Heterochromatin
chrIII	819400	819600	H3K27me3 repressed
chrIII	819600	823300	Heterochromatin
chrIII	823300	823500	Heterochromatin
chrIII	823500	823600	Heterochromatin
chrIII	823600	824100	H3K27me3 repressed
chrIII	824100	825500	Heterochromatin
chrIII	825500	825700	Heterochromatin
chrIII	825700	826200	Heterochromatin
chrIII	826200	826300	H3K27me3 repressed
chrIII	826300	826500	Heterochromatin
chrIII	826500	828100	Low signal
chrIII	828100	828500	Repressed enhancer
chrIII	828500	829900	Low signal
chrIII	829900	830100	Repressed enhancer
chrIII	830100	830600	Low signal
chrIII	830600	830700	Active enhancer
chrIII	830700	831000	Repressed enhancer
chrIII	831000	831700	Low signal
chrIII	831700	832400	Active enhancer
chrIII	832400	832600	Active enhancer
chrIII	832600	834400	Active enhancer
chrIII	834400	834500	TSS/Promoter
chrIII	834500	834600	TSS/Promoter
chrIII	834600	834900	TSS/Promoter
chrIII	834900	835100	TSS/Promoter
chrIII	835100	835600	TSS/Promoter
chrIII	835600	835900	Low signal
chrIII	835900	836000	Active enhancer
chrIII	836000	836100	Active enhancer
chrIII	836100	836800	Low signal
chrIII	836800	840600	Low signal
chrIII	840600	840700	Repressed enhancer
chrIII	840700	841000	Low signal
chrIII	841000	841200	H3K27me3 repressed
chrIII	841200	843200	Low signal
chrIII	843200	843300	Repressed enhancer
chrIII	843300	843400	Low signal
chrIII	843400	843600	Repressed enhancer
chrIII	843600	843900	Low signal
chrIII	843900	844200	Active enhancer
chrIII	844200	844300	Active enhancer
chrIII	844300	844600	Active enhancer
chrIII	844600	845400	Active enhancer
chrIII	845400	845500	Active enhancer
chrIII	845500	845600	Active enhancer
chrIII	845600	845800	Active enhancer
chrIII	845800	845900	TSS/Promoter
chrIII	845900	846000	TSS/Promoter
chrIII	846000	846100	TSS/Promoter
chrIII	846100	846700	TSS/Promoter
chrIII	846700	846800	Transcribed gene body
chrIII	846800	847100	Transcribed gene body
chrIII	847100	847300	Transcribed gene body
chrIII	847300	847500	Transcribed gene body
chrIII	847500	847700	Transcribed gene body
chrIII	847700	848000	Transcribed gene body
chrIII	848000	848500	Transcribed gene body
chrIII	848500	848700	Transcribed gene body
chrIII	848700	849000	Transcribed gene body
chrIII	849000	849600	Transcribed gene body
chrIII	849600	850200	TSS/Promoter
chrIII	850200	850400	Transcribed gene body
chrIII	850400	850800	Transcribed gene body
chrIII	850800	851000	Transcribed gene body
chrIII	851000	851300	Transcribed gene body
chrIII	851300	851500	Transcribed gene body
chrIII	851500	851800	TSS/Promoter
chrIII	851800	852100	Transcribed gene body
chrIII	852100	852400	Transcribed gene body
chrIII	852400	852900	Transcribed gene body
chrIII	852900	853400	Transcribed gene body
chrIII	853400	853800	TSS/Promoter
chrIII	853800	854000	TSS/Promoter
chrIII	854000	854300	TSS/Promoter
chrIII	854300	854400	TSS/Promoter
chrIII	854400	854700	TSS/Promoter
chrIII	854700	855800	Transcribed gene body
chrIII	855800	856000	Transcribed gene body
chrIII	856000	856400	Transcribed gene body
chrIII	856400	856600	Transcribed gene body
chrIII	856600	858000	Transcribed gene body
chrIII	858000	858200	Transcribed gene body
chrIII	858200	858600	Transcribed gene body
chrIII	858600	859100	Transcribed gene body
chrIII	859100	859700	Transcribed gene body
chrIII	859700	859900	Transcribed gene body
chrIII	859900	860200	Transcribed gene body
chrIII	860200	860400	Transcribed gene body
chrIII	860400	860600	Transcribed gene body
chrIII	860600	861200	Transcribed gene body
chrIII	861200	861900	Low signal
chrIII	861900	862000	TSS/Promoter
chrIII	862000	862400	TSS/Promoter
chrIII	862400	862500	Transcribed gene body
chrIII	862500	862600	Transcribed gene body
chrIII	862600	863300	Transcribed gene body
chrIII	863300	863800	Transcribed gene body
chrIII	863800	864000	Transcribed gene body
chrIII	864000	864700	Low signal
chrIII	864700	864800	Transcribed gene body
chrIII	864800	865000	Transcribed gene body
chrIII	865000	865200	Transcribed gene body
chrIII	865200	865400	Transcribed gene body
chrIII	865400	865600	Transcribed gene body
chrIII	865600	866800	Low signal
chrIII	866800	867000	H3K27me3 repressed
chrIII	867000	867500	Heterochromatin
chrIII	867500	867900	H3K27me3 repressed
chrIII	867900	868500	Heterochromatin
chrIII	868500	868800	H3K27me3 repressed
chrIII	868800	869600	Heterochromatin
chrIII	869600	869800	Heterochromatin
chrIII	869800	869900	Heterochromatin
chrIII	869900	870100	H3K27me3 repressed
chrIII	870100	870600	Heterochromatin
chrIII	870600	870800	H3K27me3 repressed
chrIII	870800	871700	Heterochromatin
chrIII	871700	871900	H3K27me3 repressed
chrIII	871900	872800	Low signal
chrIII	872800	873000	Repressed enhancer
chrIII	873000	875600	Low signal
chrIII	875600	876200	Repressed enhancer
chrIII	876200	876400	Low signal
chrIII	876400	876500	Repressed enhancer
chrIII	876500	876600	Low signal
chrIII	876600	876800	Transcribed gene body
chrIII	876800	877700	Transcribed gene body
chrIII	877700	877900	Transcribed gene body
chrIII	877900	878000	Transcribed gene body
chrIII	878000	878200	Transcribed gene body
chrIII	878200	878300	Transcribed gene body
chrIII	878300	878500	Transcribed gene body
chrIII	878500	878600	Transcribed gene body
chrIII	878600	878800	Transcribed gene body
chrIII	878800	879200	Transcribed gene body
chrIII	879200	880100	Transcribed gene body
chrIII	880100	880200	Active enhancer
chrIII	880200	880300	TSS/Promoter
chrIII	880300	880600	Transcribed gene body
chrIII	880600	880700	Transcribed gene body
chrIII	880700	880800	Transcribed gene body
chrIII	880800	881100	TSS/Promoter
chrIII	881100	882400	Transcribed gene body
chrIII	882400	882700	Transcribed gene body
chrIII	882700	883000	Transcribed gene body
chrIII	883000	883100	Transcribed gene body
chrIII	883100	883300	Transcribed gene body
chrIII	883300	883500	Transcribed gene body
chrIII	883500	885900	Transcribed gene body
chrIII	885900	886100	Transcribed gene body
chrIII	886100	886200	Transcribed gene body
chrIII	886200	886700	TSS/Promoter
chrIII	886700	887900	TSS/Promoter
chrIII	887900	888300	Active enhancer
chrIII	888300	888600	Active enhancer
chrIII	888600	888700	TSS/Promoter
chrIII	888700	888900	TSS/Promoter
chrIII	888900	889800	Active enhancer
chrIII	889800	889900	Active enhancer
chrIII	889900	890300	Repressed enhancer
chrIII	890300	890600	Transcribed gene body
chrIII	890600	891000	Transcribed gene body
chrIII	891000	891100	Transcribed gene body
chrIII	891100	891400	Transcribed gene body
chrIII	891400	891900	TSS/Promoter
chrIII	891900	892400	Transcribed gene body
chrIII	892400	893200	Transcribed gene body
chrIII	893200	893400	Transcribed gene body
chrIII	893400	894200	Transcribed gene body
chrIII	894200	894600	Transcribed gene body
chrIII	894600	895300	Transcribed gene body
chrIII	895300	895400	Transcribed gene body
chrIII	895400	896000	Transcribed gene body
chrIII	896000	897800	Transcribed gene body
chrIII	897800	897900	Transcribed gene body
chrIII	897900	898100	Transcribed gene body
chrIII	898100	898400	Transcribed gene body
chrIII	898400	899000	Transcribed gene body
chrIII	899000	899300	Transcribed gene body
chrIII	899300	900000	Transcribed gene body
chrIII	900000	900300	Transcribed gene body
chrIII	900300	900900	Transcribed gene body
chrIII	900900	901400	TSS/Promoter
chrIII	901400	901600	TSS/Promoter
chrIII	901600	901800	TSS/Promoter
chrIII	901800	901900	TSS/Promoter
chrIII	901900	902100	TSS/Promoter
chrIII	902100	902400	Low signal
chrIII	902400	903200	Transcribed gene body
chrIII	903200	903300	Transcribed gene body
chrIII	903300	903500	Transcribed gene body
chrIII	903500	903700	Transcribed gene body
chrIII	903700	904500	Transcribed gene body
chrIII	904500	904700	Transcribed gene body
chrIII	904700	904900	Transcribed gene body
chrIII	904900	905400	Transcribed gene body
chrIII	905400	906100	Transcribed gene body
chrIII	906100	906300	Transcribed gene body
chrIII	906300	907000	Transcribed gene body
chrIII	907000	907600	TSS/Promoter
chrIII	907600	907900	Transcribed gene body
chrIII	907900	908500	Active enhancer
chrIII	908500	908600	TSS/Promoter
chrIII	908600	908900	TSS/Promoter
chrIII	908900	909300	TSS/Promoter
chrIII	909300	909400	Transcribed gene body
chrIII	909400	909600	Transcribed gene body
chrIII	909600	910200	Transcribed gene body
chrIII	910200	910500	TSS/Promoter
chrIII	910500	910700	TSS/Promoter
chrIII	910700	911200	TSS/Promoter
chrIII	911200	911300	TSS/Promoter
chrIII	911300	911500	TSS/Promoter
chrIII	911500	912000	Transcribed gene body
chrIII	912000	912200	Transcribed gene body
chrIII	912200	912600	Low signal
chrIII	912600	912800	Repressed enhancer
chrIII	912800	913900	Low signal
chrIII	913900	914000	Repressed enhancer
chrIII	914000	914100	Low signal
[truncated: 201,451+ more rows]
