# Supplementary material for: Chromatin accessibility dynamics reveal novel functional enhancers in C. elegans
Source: Genome Res. 2017 Dec;27(12):2096–107. doi: 10.1101/gr.226233.117 (PMC5741055; doi:10.1101/gr.226233.117)
Supplement: Supplemental Material [file supp_gr.226233.117_Supplemental_Table_S12.xlsx]

## Sheet: S12 -Putative regulatory region
Gene	Putative enhancer regions			Size (bp)	Enhancer #	Differential Accessibility: EE vs L3 (FDR)	Differential Accessibility: L3 vs. YA (FDR)	Assignment note
LIN-41	chrI	9343583	9344448	1255
DAF-12	chrX	10636841	10638205	1600
best-10	chrI	14211128	14211489	556	3	EE (2.17E-25)	YA (8.88E-01)
ergo-1	chrV	1013537	1014229	894	5	EE (1.35E-21)	YA (2.81E-08)
K12C11.3	chrI	1334141	1334906	1280	4	EE (4.33E-21)	YA (4.08E-08)
C45G7.4	chrIV	2426510	2426916	600
DCS-1	chrV	20089752	20090143	572
hlh-11	chrIII	9618857	9619810	1177	7	L3 (1.11E-25)	L3 (5.84E-01)
Y40C5A.3	chrIV	7344076	7344215	443
Y73B6A.1	chrIV	6664237	6664728	674
csn-3	chrIV	195433	195958
tcc-1	chrV	17857815	17858370	775	8	L3 (1.26E-19)	L3 (9.69E-01)
C45G7.4/Y38F2AR.12	chrIV	2426510	2426916	600
Y17D7C.1	chrV	18706410	18706635	426	9	EE (1.31E-16)	L3 (3.89E-01)
cutl-16	chrII	6436806	6437219	697
F23C8.13/zwl-1	chrI	2411733	2412099	657
mltn-12	chrIV	8994557	8994895	585	10	EE (9.32E-16)	YA (1.69E-10)
jmjd-3.1	chrX	8575889	8576173	771
bed-1	chrV	19120360	19120642
dcs-1	chrV	20088320	20088925	795	12	EE (6.71E-01)	YA (2.58E-08)
c54g6.3 / c54g6.2	chrI	998885	999818	1099
W08F4.7/mlt-8	chrII	574137	574430	498	13	L3 (5.78E-02)	L3 (7.60E-04)	At the 3' end of W08F4.7 and upstream of mlt-8; was assigned to mlt-8 due to its expression pattern - hypodermal
C15H7.3/gei-13	chrIII	9646330	9646662	500	14	L3 (1.28E-03)	L3 (7.92E-04)	At the 3' end of C15H7.3 and upstream ofgei-13; was assigned to gei-13 due to its expression pattern - hypodermal, and that fact that it overlapped with a previously used promoter construct of gei-13
lon-8 / y59a8b.19	chrV	18003710	18004420	871	13
y48g8al.15	chrI	1255918	1256385	698	14
swip-10	chrX	2116352	2117003	826	15	L3 (1.67E-05)	L3 (1.50E-03)
nhr-25	chrX	13014303	13014628	543	16	L3 (2.60E-02)	L3 (1.52E-03)
C54G6.3 / C54G6.2	chrI	1000921	1001216	493	17	L3 (4.51E-05)	L3 (1.52E-03)
