# Supplementary material for: Chromatin accessibility dynamics reveal novel functional enhancers in C. elegans
Source: Genome Res. 2017 Dec;27(12):2096–107. doi: 10.1101/gr.226233.117 (PMC5741055; doi:10.1101/gr.226233.117)
Supplement: Supplemental Material [file supp_gr.226233.117_Supplemental_Table_S13.xlsx]

## Sheet: S13 - Primers
Oligo Name	Sequence
F best-10	CGGGGATTGGGGATCCC AGG CCT gca tca aaa atg ttt tgg ttt t
R best-10	CGGGGATTGGGGATCCCTCT AGA cgc gtt tta agg aaa att gc
F K12C11.3	CGGGGATTGGGGATCCCAGG CCT GGA TCC CGA TCG AGA CCT AT
R K12C11.3	CGGGGATTGGGGATCCCTCT AGA CCG CTC AAA GAA AAG TGA CG
F hlh-11	CGGGGATTGGGGATCCCAGG CCT TCA AGC ACA CCA GGC AAT TA
R hlh-11	CGGGGATTGGGGATCCCTCT AGA TCT ACT CCC GCA ATT TTT GG
F tcc-1	CGGGGATTGGGGATCCCAGG CCT AGA GAA ACC TGG CCC AAA AC
R tcc-1	CGGGGATTGGGGATCCCTCT AGA CAC ATT TTT CCG GGG ATT T
F Y17D7C.1	CGGGGATTGGGGATCCCAGG CCT TTT TTC GTT GGA AAA TTG GAA
R Y17D7C.1	CGGGGATTGGGGATCCCTCT AGA TTT TTC GTT GGA AAA TTG GAA
F mltn-12	CGGGGATTGGGGATCCCAGG CCT TGA TCT TCC TGA TTC TCC TCT TG
R mltn-12	CGGGGATTGGGGATCCCTCT AGA AGA CTC GAC ACG AAG GAT CAA
F K09F6.4/K09F6.3	CGGGGATTGGGGATCCCAGG CCT GGA CAT GAA GAC AGC CGA AG
R K09F6.4/K09F6.3	CGGGGATTGGGGATCCCTCT AGA AAG GAA GAA GAA GGA TGC TTG A
F dcs-1	CGGGGATTGGGGATCCCAGG CCT TTT TTA AGG GAA TTT GGC TTT T
R dcs-1	CGGGGATTGGGGATCCCTCT AGA CAA GTT TCG CAC AAT AGT ACC G
F W08F4.7	CGGGGATTGGGGATCCCAGG CCT TTG TCT ACG TAC ACT TCA AAC TTA AAA
R W08F4.7	CGGGGATTGGGGATCCCTCT AGA TCG TAA ATC TTC AAT GAA ATA AGA AA
F C15H7.3	CGGGGATTGGGGATCCCAGG CCT TCA AAT GCC GTA GAA AAA GAA A
R C15H7.3	CGGGGATTGGGGATCCCTCT AGA TCC GCT TTG TGG ACA TAC AA
F F53B1.6	CGGGGATTGGGGATCCCAGG CCT ttG AAA ATC TAT CCA ATG TAG TGT TG
R F53B1.6	CGGGGATTGGGGATCCCTCT AGA TTG TTA CAA AAG ATT CCT GCG TTA
F nhr-25	CGGGGATTGGGGATCCCAGG CCT TCT ACA AAG GGC GTT TTT CC
R nhr-25	CGGGGATTGGGGATCCCTCT AGA TTG ATC CCT TCC ACT GTT CC
F C54G6.3/C54G6.2	CGGGGATTGGGGATCCCAGG CCT CCA GAG CAC CCA CAG AAA A
R C54G6.3/C54G6.2	CGGGGATTGGGGATCCCTCT AGA GGA AAA GGT GCT CCT GCT AA
F flank4	CGGGGATTGGGGATCCC TCTAGA gaaggccagaacccagtgTA
R flank4	AG CTTGCATGCC TGC AGGCCT GATCGGGATCCACTGAAGAA
F flank7	AG CTTGCATGCC TGC AGGCCT TGATTTGCTTGAGCTGTTCG
R flank7	CGGGGATTGGGGATCCC TCTAGA GCAATTTGCGCCTTATGAAT
F flank8	AG CTTGCATGCC TGC AGGCCT TCGGAAGGAAAAGCTTCAAA
R flank8	CGGGGATTGGGGATCCC TCTAGA CAAGGTCATTTTCGCACTCA
F flank9	CGGGGATTGGGGATCCC TCTAGA TTGTCTGTAACCTCAGTGTGTgg
R flank9	AG CTTGCATGCC TGC AGGCCT ccgccaaatttgtttctcaa
F flank12	AG CTTGCATGCC TGC AGGCCT CGGTACTATTGTGCGAAACTTG
R flank12	CGGGGATTGGGGATCCC TCTAGA GGGTGTACAATTGCCTGGAA
F flank13	AG CTTGCATGCC TGC AGGCCT GCATGCTGAGGAATATGCAA
R flank13	CGGGGATTGGGGATCCC TCTAGA GCAATCAAAATTTGTAGCCCTTT
F flank14	AG CTTGCATGCC TGC AGGCCT CTCCAGTGATGTGCGAAATG
R flank14	CGGGGATTGGGGATCCC TCTAGA GAACCTGCATCAATGCTCAA
F flank15	AG CTTGCATGCC TGC AGGCCT CTGCGATTTTGGAGCGTTAT
R flank15	CGGGGATTGGGGATCCC TCTAGA AAGGCATGTAAAATTTAAACAACA
F flank16	CGGGGATTGGGGATCCC TCTAGA GTGATTTTACGGCGTTGGAG
R flank16	AG CTTGCATGCC TGC AGGCCT CTGCAGGATGGGTTGTTTTT
F flank17	CGGGGATTGGGGATCCC TCTAGA acgcgttgtccatctgaag
R flank17	AG CTTGCATGCC TGC AGGCCT ccgtgCGTTTGAGAATTTTT
Ad1_noMX	AATGATACGGCGACCACCGAGATCTACACTCGTCGGCAGCGTCAGATGTG
Ad2.1_TAAGGCGA	CAAGCAGAAGACGGCATACGAGATTCGCCTTAGTCTCGTGGGCTCGGAGATGT
Ad2.2_CGTACTAG	CAAGCAGAAGACGGCATACGAGATCTAGTACGGTCTCGTGGGCTCGGAGATGT
Ad2.3_AGGCAGAA	CAAGCAGAAGACGGCATACGAGATTTCTGCCTGTCTCGTGGGCTCGGAGATGT
Ad2.4_TCCTGAGC	CAAGCAGAAGACGGCATACGAGATGCTCAGGAGTCTCGTGGGCTCGGAGATGT
Ad2.5_GGACTCCT	CAAGCAGAAGACGGCATACGAGATAGGAGTCCGTCTCGTGGGCTCGGAGATGT
Ad2.6_TAGGCATG	CAAGCAGAAGACGGCATACGAGATCATGCCTAGTCTCGTGGGCTCGGAGATGT
