# Supplementary material for: Chromatin accessibility dynamics reveal novel functional enhancers in C. elegans
Source: Genome Res. 2017 Dec;27(12):2096–107. doi: 10.1101/gr.226233.117 (PMC5741055; doi:10.1101/gr.226233.117)
Supplement: Supplemental Material [file supp_gr.226233.117_Supplemental_Table_S14.xlsx]

## Sheet: S14 - TF ChIP-seqs
Stage	TF	Strain
EE	PAX-1	DCC3856
EE	CEH-39	DCC3858
EE	NHR-2	DCC3859
EE	BLMP-1	DCC4036
EE	GEI-11	OP179
EE	UNC-39	OP186
EE	NHR-76	OP203
EE	NHR-237	OP228
EE	ZTF-11	OP236
EE	MAB-5	OP27
EE	NHR-28	OP317
EE	NHR-12	OP318
EE	F23F12	OP327
EE	LSY-2	OP367
EE	LIN-13	OP51
EE	UNC-62	OP600
EE	HLH-1	OP64
EE	MEP-1	OP70
EE	ELT-3	OP75
EE	TBP-1	SDQ0839
L3	EGL-5	DCC3159
L3	FKH-10	DCC4027
L3	NHR-67	DCC4031
L3	CES-1	OP174
L3	EGL-27	OP177
L3	GEI-11	OP179
L3	LIN-15B	OP184
L3	LIN-15B	OP184
L3	FKH-2	OP185
L3	UNC-39	OP186
L3	SEA-2	OP193
L3	MML-1	OP198
L3	PQM-1	OP201
L3	PQM-1	OP201
L3	CEH-9	OP202
L3	NHR-76	OP203
L3	F45C12	OP212
L3	ALY-2	OP217
L3	R02D3	OP218
L3	DAF-12	OP222
L3	NHR-237	OP228
L3	ZK546	OP231
L3	JUN-1	OP234
L3	ZTF-11	OP236
L3	CEH-28	OP241
L3	FOS-1	OP304
L3	NHR-11	OP305
L3	NHR-28	OP317
L3	NHR-12	OP318
L3	ZTF-4	OP322
L3	FKH-10	OP337
L3	NHR-25	OP33
L3	SKN-1	OP342
L3	NHR-77	OP353
L3	ELT-1	OP354
L3	SAX-3	OP355
L3	PHA-4	OP37
L3	NHR-23	OP43
L3	UNC-62	OP600
L3	UNC-62	OP602
L3	ELT-3	OP75
L3	EOR-1	OP81
L3	CEH-16	OP82
L3	ZAG-1	OP83
L3	HPL-2	SDQ2340
L3	HAD-1	SDQ2354
YA	W03F9	DCC3217
YA	HPL-2	DCC4641
YA	GEI-11	OP179
YA	PHA-4	OP37
YA	DPL-1	YL390
YA	LIN-35	YL402
YA	EFL-1	YL445
YA	GEI-11	YL457
YA	LIN-35	YL468
YA	RPC-15	YL517
YA	LIN-35	YL521
